# Supplementary material for: Comparison of Gene Expression Profile in Embryonic Mesencephalon and Neuronal Primary Cultures
Source: PubMed Central journal article supplement (PMC2654915; doi:10.1371/journal.pone.0004977), 2009-03-23
Supplement: pone.0004977.s004.pdf [file pone.0004977.s004.pdf]

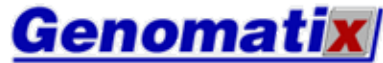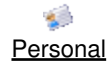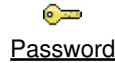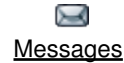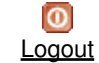

[LitInspector](#)
[GEMS Launcher](#)
[EIDorado](#)
[Gene2Promoter](#)
[MatBase](#)  
[FAQ](#)
[Projects](#)
[GenomatixPortal](#)
[Protocol](#)
[Help](#)

GEMS Launcher Task: *ModelInspector*: Search for user-defined models working on Rat Promoters

### Output overview of ModelInspector matches (1264 matches)

go to: [ [Output overview](#) ] [ [Detailed output](#) ] [ [Statistics](#) ]

ModelInspector Release 5.5 February 2008

Tue May 27 16:48:09 2008

#### Solution parameters:

**Sequence file:** Rat Promoters  
**Models:** User-defined/EGRF-SP1F.model  
**Strand(s) searched:** both strands  
**Threshold for number of elements:** 100.0 % (2 of 2 elements)  
**Output sorted by:** match positions on the sequences  
**Maximum number of matches:** 1000

#### Match List:

| Sequence                                                                                                                                         | Model Name | Position  | Strand | Select Match |
|--------------------------------------------------------------------------------------------------------------------------------------------------|------------|-----------|--------|--------------|
| GXP_960 [GXP_960] (1 - 609)<br>Hs3st2, GXL_704, GeneID: 293451, Rattus norvegicus chr. 1<br>heparan sulfate (glucosamine) 3-O-sulfotransferase 2 | EGRF-SP1F  | 537 - 557 | (+)    |              |
| GXP_991 [GXP_991] (1 - 1100)<br>Fgf3, GXL_732, GeneID: 170633, Rattus norvegicus chr. 1<br>fibroblast growth factor 3                            | EGRF-SP1F  | 831 - 851 | (+)    |              |
| GXP_995 [GXP_995] (1 - 680)<br>P4ha3, GXL_736, GeneID: 361612, Rattus norvegicus chr. 1                                                          | EGRF-SP1F  | 186 - 206 | (+)    |              |
|                                                                                                                                                  | EGRF-SP1F  | 192 - 212 | (+)    |              |

procollagen-proline, 2-oxoglutarate 4-dioxygenase (proline 4-hydroxylase), alpha polypeptide III

**GXP\_1027** [[GXP\\_1027](#)] (1 - 881)

**Arrb1**, GXL\_766, GeneID: 25387, Rattus norvegicus chr. 1  
arrestin, beta 1

**GXP\_1043** [[GXP\\_1043](#)] (1 - 792)

**Prp\_c predicted**, GXL\_782, GeneID: 293118, Rattus norvegicus chr. 1  
prolylcarboxypeptidase (angiotensinase C) (predicted)

**GXP\_1410284** [[GXP\\_1410284](#)] (1 - 601)

**Itgad**, GXL\_793, GeneID: 64350, Rattus norvegicus chr. 1  
integrin, alpha D

**GXP\_1069** [[GXP\\_1069](#)] (1 - 760)

**Ap2a2**, GXL\_807, GeneID: 81637, Rattus norvegicus chr. 1  
adaptor protein complex AP-2, alpha 2 subunit

**GXP\_1073** [[GXP\\_1073](#)] (1 - 1375)

**Bckdk**, GXL\_811, GeneID: 29603, Rattus norvegicus chr. 1  
branched chain ketoacid dehydrogenase kinase

**GXP\_1082** [[GXP\\_1082](#)] (1 - 780)

**Cd81**, GXL\_820, GeneID: 25621, Rattus norvegicus chr. 1  
CD 81 antigen

**GXP\_1093** [[GXP\\_1093](#)] (1 - 601)

**Picalm**, GXL\_831, GeneID: 89816, Rattus norvegicus chr. 1  
phosphatidylinositol binding clathrin assembly protein

**GXP\_1129** [[GXP\\_1129](#)] (1 - 601)

**Olr20 predicted**, GXL\_867, GeneID: 293083, Rattus norvegicus chr. 1  
olfactory receptor 20 (predicted)

**GXP\_1409786** [[GXP\\_1409786](#)] (1 - 601)

**Slc28a1**, GXL\_869, GeneID: 116642, Rattus norvegicus chr. 1  
solute carrier family 28 (sodium-coupled nucleoside transporter), member 1

**GXP\_1150** [[GXP\\_1150](#)] (1 - 601)

**Olr154 predicted**, GXL\_887, GeneID: 365333, Rattus norvegicus chr. 1  
olfactory receptor 154 (predicted)

**GXP\_1159002** [[GXP\\_1159002](#)] (1 - 650)

**Phkg2**, GXL\_903, GeneID: 140671, Rattus norvegicus chr. 1  
phosphorylase kinase, gamma 2 (testis)

**GXP\_1410256** [[GXP\\_1410256](#)] (1 - 601)

**Phkg2**, GXL\_903, GeneID: 140671, Rattus norvegicus chr. 1  
phosphorylase kinase, gamma 2 (testis)

|                           |                           |     |
|---------------------------|---------------------------|-----|
| <a href="#">EGRF-SP1F</a> | <a href="#">523 - 501</a> | (-) |
| <a href="#">EGRF-SP1F</a> | <a href="#">661 - 641</a> | (-) |
| <a href="#">EGRF-SP1F</a> | <a href="#">178 - 157</a> | (-) |
| <a href="#">EGRF-SP1F</a> | <a href="#">691 - 670</a> | (-) |
| <a href="#">EGRF-SP1F</a> | <a href="#">697 - 676</a> | (-) |
| <a href="#">EGRF-SP1F</a> | <a href="#">331 - 351</a> | (+) |
| <a href="#">EGRF-SP1F</a> | <a href="#">476 - 456</a> | (-) |
| <a href="#">EGRF-SP1F</a> | <a href="#">428 - 448</a> | (+) |
| <a href="#">EGRF-SP1F</a> | <a href="#">569 - 547</a> | (-) |
| <a href="#">EGRF-SP1F</a> | <a href="#">230 - 206</a> | (-) |
| <a href="#">EGRF-SP1F</a> | <a href="#">146 - 126</a> | (-) |
| <a href="#">EGRF-SP1F</a> | <a href="#">211 - 189</a> | (-) |
| <a href="#">EGRF-SP1F</a> | <a href="#">217 - 195</a> | (-) |
| <a href="#">EGRF-SP1F</a> | <a href="#">223 - 201</a> | (-) |
| <a href="#">EGRF-SP1F</a> | <a href="#">367 - 389</a> | (+) |
| <a href="#">EGRF-SP1F</a> | <a href="#">219 - 242</a> | (+) |
| <a href="#">EGRF-SP1F</a> | <a href="#">283 - 303</a> | (+) |
| <a href="#">EGRF-SP1F</a> | <a href="#">135 - 113</a> | (-) |
| <a href="#">EGRF-SP1F</a> | <a href="#">39 - 19</a>   | (-) |

|                                                                                                                                         |                           |                           |     |
|-----------------------------------------------------------------------------------------------------------------------------------------|---------------------------|---------------------------|-----|
| <b>GXP_1179</b> [ <a href="#">GXP_1179</a> ] (1 - 1136)                                                                                 | <a href="#">EGRF-SP1F</a> | <a href="#">567 - 587</a> | (+) |
| <b>Isq20</b> , GXL_915, GeneID: 293052, Rattus norvegicus chr. 1<br>interferon stimulated exonuclease 20                                | <a href="#">EGRF-SP1F</a> | <a href="#">953 - 976</a> | (+) |
| <b>GXP_1409737</b> [ <a href="#">GXP_1409737</a> ] (1 - 602)                                                                            | <a href="#">EGRF-SP1F</a> | <a href="#">240 - 216</a> | (-) |
| <b>Abhd2_predicted</b> , GXL_917, GeneID: 293050, Rattus norvegicus chr. 1<br>abhydrolase domain containing 2 (predicted)               | <a href="#">EGRF-SP1F</a> | <a href="#">469 - 448</a> | (-) |
| <b>GXP_1196</b> [ <a href="#">GXP_1196</a> ] (1 - 1110)                                                                                 | <a href="#">EGRF-SP1F</a> | <a href="#">612 - 633</a> | (+) |
| <b>Pde3b</b> , GXL_932, GeneID: 29516, Rattus norvegicus chr. 1<br>phosphodiesterase 3B                                                 | <a href="#">EGRF-SP1F</a> | <a href="#">904 - 882</a> | (-) |
| <b>GXP_1209</b> [ <a href="#">GXP_1209</a> ] (1 - 1227)                                                                                 | <a href="#">EGRF-SP1F</a> | <a href="#">190 - 213</a> | (+) |
| <b>Ric8a</b> , GXL_945, GeneID: 293614, Rattus norvegicus chr. 1<br>resistance to inhibitors of cholinesterase 8 homolog A (C. elegans) | <a href="#">EGRF-SP1F</a> | <a href="#">469 - 447</a> | (-) |
| <b>GXP_1409694</b> [ <a href="#">GXP_1409694</a> ] (1 - 621)                                                                            | <a href="#">EGRF-SP1F</a> | <a href="#">679 - 656</a> | (-) |
| <b>Igf1r</b> , GXL_953, GeneID: 25718, Rattus norvegicus chr. 1<br>insulin-like growth factor 1 receptor                                | <a href="#">EGRF-SP1F</a> | <a href="#">477 - 454</a> | (-) |
| <b>GXP_1410370</b> [ <a href="#">GXP_1410370</a> ] (1 - 647)                                                                            | <a href="#">EGRF-SP1F</a> | <a href="#">483 - 459</a> | (-) |
| <b>Ppp2r2d</b> , GXL_957, GeneID: 246255, Rattus norvegicus chr. 1<br>protein phosphatase 2, regulatory subunit B, delta isoform        | <a href="#">EGRF-SP1F</a> | <a href="#">488 - 465</a> | (-) |
| <b>GXP_1236</b> [ <a href="#">GXP_1236</a> ] (1 - 844)                                                                                  | <a href="#">EGRF-SP1F</a> | <a href="#">580 - 558</a> | (-) |
| <b>Mesdc2</b> , GXL_972, GeneID: 308796, Rattus norvegicus chr. 1<br>mesoderm development candiate 2                                    | <a href="#">EGRF-SP1F</a> | <a href="#">577 - 597</a> | (+) |
| <b>GXP_1244</b> [ <a href="#">GXP_1244</a> ] (1 - 729)                                                                                  | <a href="#">EGRF-SP1F</a> | <a href="#">675 - 696</a> | (+) |
| <b>Pde2a</b> , GXL_980, GeneID: 81743, Rattus norvegicus chr. 1<br>phosphodiesterase 2A, cGMP-stimulated                                | <a href="#">EGRF-SP1F</a> | <a href="#">646 - 623</a> | (-) |
| <b>GXP_1249</b> [ <a href="#">GXP_1249</a> ] (1 - 847)                                                                                  | <a href="#">EGRF-SP1F</a> | <a href="#">855 - 878</a> | (+) |
| <b>Pde8a</b> , GXL_985, GeneID: 308776, Rattus norvegicus chr. 1<br>phosphodiesterase 8A                                                | <a href="#">EGRF-SP1F</a> | <a href="#">907 - 928</a> | (+) |
| <b>GXP_1410231</b> [ <a href="#">GXP_1410231</a> ] (1 - 931)                                                                            | <a href="#">EGRF-SP1F</a> | <a href="#">85 - 108</a>  | (+) |
| <b>Doc2a</b> , GXL_991, GeneID: 65031, Rattus norvegicus chr. 1<br>double C2, alpha                                                     | <a href="#">EGRF-SP1F</a> | <a href="#">137 - 158</a> | (+) |
| <b>GXP_1410232</b> [ <a href="#">GXP_1410232</a> ] (1 - 601)                                                                            | <a href="#">EGRF-SP1F</a> | <a href="#">440 - 461</a> | (+) |
| <b>Doc2a</b> , GXL_991, GeneID: 65031, Rattus norvegicus chr. 1<br>double C2, alpha                                                     | <a href="#">EGRF-SP1F</a> | <a href="#">445 - 467</a> | (+) |
| <b>GXP_1258</b> [ <a href="#">GXP_1258</a> ] (1 - 860)                                                                                  | <a href="#">EGRF-SP1F</a> | <a href="#">449 - 471</a> | (+) |
| <b>Agc1</b> , GXL_994, GeneID: 58968, Rattus norvegicus chr. 1<br>aggrecan 1                                                            | <a href="#">EGRF-SP1F</a> | <a href="#">732 - 756</a> | (+) |

|                                                                                                                                                                                                        |                           |                           |     |
|--------------------------------------------------------------------------------------------------------------------------------------------------------------------------------------------------------|---------------------------|---------------------------|-----|
| <b>GXP_1266</b> [ <a href="#">GXP_1266</a> ] (1 - 684)<br><b>Rnf40</b> , GXL_1002, GeneID: 266712, Rattus norvegicus chr. 1<br>ring finger protein 40                                                  | <a href="#">EGRF-SP1F</a> | <a href="#">450 - 430</a> | (-) |
| <b>GXP_1410257</b> [ <a href="#">GXP_1410257</a> ] (1 - 602)<br><b>Rnf40</b> , GXL_1002, GeneID: 266712, Rattus norvegicus chr. 1<br>ring finger protein 40                                            | <a href="#">EGRF-SP1F</a> | <a href="#">162 - 142</a> | (-) |
| <b>GXP_1281</b> [ <a href="#">GXP_1281</a> ] (1 - 675)<br><b>Lcmt1</b> , GXL_1017, GeneID: 361643, Rattus norvegicus chr. 1<br>leucine carboxyl methyltransferase 1                                    | <a href="#">EGRF-SP1F</a> | <a href="#">530 - 507</a> | (-) |
| <b>GXP_1287</b> [ <a href="#">GXP_1287</a> ] (1 - 1290)<br><b>Tbx6_predicted</b> , GXL_1023, GeneID: 365371, Rattus norvegicus chr. 1<br>T-box 6 (predicted)                                           | <a href="#">EGRF-SP1F</a> | <a href="#">375 - 353</a> | (-) |
| <b>GXP_1410223</b> [ <a href="#">GXP_1410223</a> ] (1 - 601)<br><b>Tbx6_predicted</b> , GXL_1023, GeneID: 365371, Rattus norvegicus chr. 1<br>T-box 6 (predicted)                                      | <a href="#">EGRF-SP1F</a> | <a href="#">25 - 49</a>   | (+) |
| <b>GXP_1295</b> [ <a href="#">GXP_1295</a> ] (1 - 618)<br><b>Prap1</b> , GXL_1031, GeneID: 60574, Rattus norvegicus chr. 1<br>proline-rich acidic protein 1                                            | <a href="#">EGRF-SP1F</a> | <a href="#">407 - 387</a> | (-) |
| <b>GXP_1409874</b> [ <a href="#">GXP_1409874</a> ] (1 - 679)<br><b>Pak1</b> , GXL_1044, GeneID: 29431, Rattus norvegicus chr. 1<br>p21 (CDKN1A)-activated kinase 1                                     | <a href="#">EGRF-SP1F</a> | <a href="#">467 - 487</a> | (+) |
| <b>GXP_1318</b> [ <a href="#">GXP_1318</a> ] (1 - 701)<br><b>Gab2</b> , GXL_1053, GeneID: 84477, Rattus norvegicus chr. 1<br>growth factor receptor bound protein 2-associated protein 2               | <a href="#">EGRF-SP1F</a> | <a href="#">471 - 492</a> | (+) |
| <b>GXP_1350</b> [ <a href="#">GXP_1350</a> ] (1 - 601)<br><b>Olr41_predicted</b> , GXL_1085, GeneID: 293195, Rattus norvegicus chr. 1<br>olfactory receptor 41 (predicted)                             | <a href="#">EGRF-SP1F</a> | <a href="#">70 - 47</a>   | (-) |
| <b>GXP_1354</b> [ <a href="#">GXP_1354</a> ] (1 - 601)<br><b>Bag3</b> , GXL_1089, GeneID: 293524, Rattus norvegicus chr. 1<br>Bcl2-associated athanogene 3                                             | <a href="#">EGRF-SP1F</a> | <a href="#">488 - 509</a> | (+) |
| <b>GXP_1409960</b> [ <a href="#">GXP_1409960</a> ] (1 - 602)<br><b>Trpc2</b> , GXL_1119, GeneID: 64573, Rattus norvegicus chr. 1<br>transient receptor potential cation channel, subfamily C, member 2 | <a href="#">EGRF-SP1F</a> | <a href="#">127 - 147</a> | (+) |
| <b>GXP_1385</b> [ <a href="#">GXP_1385</a> ] (1 - 601)<br><b>Mgmt</b> , GXL_1120, GeneID: 25332, Rattus norvegicus chr. 1<br>O-6-methylguanine-DNA methyltransferase                                   | <a href="#">EGRF-SP1F</a> | <a href="#">268 - 292</a> | (+) |
| <b>GXP_1393</b> [ <a href="#">GXP_1393</a> ] (1 - 700)<br><b>Prc1_predicted</b> , GXL_1128, GeneID: 308761, Rattus norvegicus chr. 1<br>protein regulator of cytokinesis 1 (predicted)                 | <a href="#">EGRF-SP1F</a> | <a href="#">337 - 357</a> | (+) |
|                                                                                                                                                                                                        | <a href="#">EGRF-SP1F</a> | <a href="#">340 - 361</a> | (+) |
|                                                                                                                                                                                                        | <a href="#">EGRF-SP1F</a> | <a href="#">306 - 326</a> | (+) |
|                                                                                                                                                                                                        | <a href="#">EGRF-SP1F</a> | <a href="#">440 - 417</a> | (-) |
|                                                                                                                                                                                                        | <a href="#">EGRF-SP1F</a> | <a href="#">467 - 446</a> | (-) |

**GXP\_1419** [[GXP\\_1419](#)] (1 - 601)  
**Tm6sf1 predicted**, GXL\_1154, GeneID: 361600, Rattus norvegicus chr. 1  
transmembrane 6 superfamily member 1 (predicted)

**GXP\_1425** [[GXP\\_1425](#)] (1 - 742)  
**Fgf15**, GXL\_1160, GeneID: 170582, Rattus norvegicus chr. 1  
fibroblast growth factor 15

**GXP\_1446** [[GXP\\_1446](#)] (1 - 634)  
**Ncoa2**, GXL\_1181, GeneID: 83724, Rattus norvegicus chr. 5  
nuclear receptor coactivator 2

**GXP\_1453** [[GXP\\_1453](#)] (1 - 601)  
**C1gg**, GXL\_1188, GeneID: 362634, Rattus norvegicus chr. 5  
complement component 1, q subcomponent, gamma polypeptide

**GXP\_1416679** [[GXP\\_1416679](#)] (1 - 607)  
**Clcnkb**, GXL\_1198, GeneID: 79430, Rattus norvegicus chr. 5  
chloride channel Kb

**GXP\_1504** [[GXP\\_1504](#)] (1 - 669)  
**Zfp483**, GXL\_1237, GeneID: 170955, Rattus norvegicus chr. 5  
zinc finger protein 483

**GXP\_1509** [[GXP\\_1509](#)] (1 - 601)  
**Spink4**, GXL\_1242, GeneID: 408233, Rattus norvegicus chr. 5  
Kazal type serine protease inhibitor 4

**GXP\_1527** [[GXP\\_1527](#)] (1 - 864)  
**Cdw92**, GXL\_1260, GeneID: 85254, Rattus norvegicus chr. 5  
CDW92 antigen

**GXP\_1545** [[GXP\\_1545](#)] (1 - 601)  
**Ccin**, GXL\_1276, GeneID: 298392, Rattus norvegicus chr. 5  
calicin

**GXP\_1547** [[GXP\\_1547](#)] (1 - 601)  
**Rab2**, GXL\_1278, GeneID: 65158, Rattus norvegicus chr. 5  
RAB2, member RAS oncogene family

**GXP\_1415645** [[GXP\\_1415645](#)] (1 - 601)  
**Rab2**, GXL\_1278, GeneID: 65158, Rattus norvegicus chr. 5  
RAB2, member RAS oncogene family

**GXP\_1558** [[GXP\\_1558](#)] (1 - 982)  
**Faah**, GXL\_1289, GeneID: 29347, Rattus norvegicus chr. 5  
fatty acid amide hydrolase

**GXP\_1570** [[GXP\\_1570](#)] (1 - 1176)  
**Ttc22 predicted**, GXL\_1300, GeneID: 298300, Rattus norvegicus chr. 5

|                           |                           |     |
|---------------------------|---------------------------|-----|
| <a href="#">EGRF-SP1F</a> | <a href="#">295 - 318</a> | (+) |
| <a href="#">EGRF-SP1F</a> | <a href="#">413 - 389</a> | (-) |
| <a href="#">EGRF-SP1F</a> | <a href="#">275 - 251</a> | (-) |
| <a href="#">EGRF-SP1F</a> | <a href="#">277 - 256</a> | (-) |
| <a href="#">EGRF-SP1F</a> | <a href="#">279 - 258</a> | (-) |
| <a href="#">EGRF-SP1F</a> | <a href="#">287 - 264</a> | (-) |
| <a href="#">EGRF-SP1F</a> | <a href="#">424 - 403</a> | (-) |
| <a href="#">EGRF-SP1F</a> | <a href="#">565 - 589</a> | (+) |
| <a href="#">EGRF-SP1F</a> | <a href="#">416 - 395</a> | (-) |
| <a href="#">EGRF-SP1F</a> | <a href="#">360 - 384</a> | (+) |
| <a href="#">EGRF-SP1F</a> | <a href="#">366 - 388</a> | (+) |
| <a href="#">EGRF-SP1F</a> | <a href="#">116 - 137</a> | (+) |
| <a href="#">EGRF-SP1F</a> | <a href="#">576 - 556</a> | (-) |
| <a href="#">EGRF-SP1F</a> | <a href="#">498 - 519</a> | (+) |
| <a href="#">EGRF-SP1F</a> | <a href="#">501 - 523</a> | (+) |
| <a href="#">EGRF-SP1F</a> | <a href="#">395 - 374</a> | (-) |
| <a href="#">EGRF-SP1F</a> | <a href="#">291 - 268</a> | (-) |
| <a href="#">EGRF-SP1F</a> | <a href="#">276 - 256</a> | (-) |
| <a href="#">EGRF-SP1F</a> | <a href="#">312 - 333</a> | (+) |
| <a href="#">EGRF-SP1F</a> | <a href="#">317 - 338</a> | (+) |
| <a href="#">EGRF-SP1F</a> | <a href="#">321 - 342</a> | (+) |
| <a href="#">EGRF-SP1F</a> | <a href="#">127 - 107</a> | (-) |
| <a href="#">EGRF-SP1F</a> | <a href="#">129 - 109</a> | (-) |

tetratricopeptide repeat domain 22 (predicted)

**GXP\_1580** [[GXP\\_1580](#)] (1 - 1148)

**Wdr32\_predicted**, GXL\_1310, GeneID: 313242, Rattus norvegicus chr. 5  
WD repeat domain 32 (predicted)

[EGRF-SP1F](#) [674 - 651](#) (-)

**GXP\_1589** [[GXP\\_1589](#)] (1 - 651)

**Sdcbp**, GXL\_1319, GeneID: 83841, Rattus norvegicus chr. 5  
syndecan binding protein

[EGRF-SP1F](#) [438 - 418](#) (-)

**GXP\_1415635** [[GXP\\_1415635](#)] (1 - 601)

**Sdcbp**, GXL\_1319, GeneID: 83841, Rattus norvegicus chr. 5  
syndecan binding protein

[EGRF-SP1F](#) [384 - 364](#) (-)

**GXP\_1600** [[GXP\\_1600](#)] (1 - 728)

**Klhl17**, GXL\_1329, GeneID: 246757, Rattus norvegicus chr. 5  
kelch-like 17 (Drosophila)

[EGRF-SP1F](#) [699 - 720](#) (+)

**GXP\_1610** [[GXP\\_1610](#)] (1 - 844)

**Faf1**, GXL\_1339, GeneID: 140657, Rattus norvegicus chr. 5  
Fas-associated factor 1

[EGRF-SP1F](#) [481 - 460](#) (-)

**GXP\_1613** [[GXP\\_1613](#)] (1 - 632)

**Tmod1**, GXL\_1342, GeneID: 25566, Rattus norvegicus chr. 5  
tropomodulin 1

[EGRF-SP1F](#) [457 - 436](#) (-)

[EGRF-SP1F](#) [475 - 453](#) (-)

**GXP\_1614** [[GXP\\_1614](#)] (1 - 788)

**Clta**, GXL\_1343, GeneID: 83800, Rattus norvegicus chr. 5  
clathrin, light polypeptide (Lca)

[EGRF-SP1F](#) [638 - 615](#) (-)

**GXP\_1624** [[GXP\\_1624](#)] (1 - 796)

**Kif1b**, GXL\_1353, GeneID: 117548, Rattus norvegicus chr. 5  
kinesin family member 1B

[EGRF-SP1F](#) [343 - 363](#) (+)

**GXP\_517848** [[GXP\\_517848](#)] (1 - 726)

**Fbxo6b**, GXL\_1362, GeneID: 192351, Rattus norvegicus chr. 5  
F-box only protein 6b

[EGRF-SP1F](#) [499 - 477](#) (-)

**GXP\_1167450** [[GXP\\_1167450](#)] (1 - 601)

**Pde4b**, GXL\_1405, GeneID: 24626, Rattus norvegicus chr. 5  
phosphodiesterase 4B, cAMP specific

[EGRF-SP1F](#) [171 - 191](#) (+)

[EGRF-SP1F](#) [332 - 311](#) (-)

**GXP\_1679** [[GXP\\_1679](#)] (1 - 647)

**Clcnk1**, GXL\_1407, GeneID: 79425, Rattus norvegicus chr. 5  
chloride channel K1

[EGRF-SP1F](#) [470 - 448](#) (-)

[EGRF-SP1F](#) [475 - 454](#) (-)

**GXP\_1682** [[GXP\\_1682](#)] (1 - 998)

**Nr4a3**, GXL\_1409, GeneID: 58853, Rattus norvegicus chr. 5  
nuclear receptor subfamily 4, group A, member 3

[EGRF-SP1F](#) [550 - 570](#) (+)

**GXP\_1167102** [[GXP\\_1167102](#)] (1 - 601)

**Nr4a3**, GXL\_1409, GeneID: 58853, Rattus norvegicus chr. 5  
nuclear receptor subfamily 4, group A, member 3

[EGRF-SP1F](#) [428 - 452](#) (+)

|                                                                                                                                                                                                         |                           |                           |     |
|---------------------------------------------------------------------------------------------------------------------------------------------------------------------------------------------------------|---------------------------|---------------------------|-----|
| <b>GXP_1688</b> [ <a href="#">GXP_1688</a> ] (1 - 602)<br><b>Anp32b</b> , GXL_1415, GeneID: 170724, Rattus norvegicus chr. 5<br>acidic nuclear phosphoprotein 32 family, member B                       | <a href="#">EGRF-SP1F</a> | <a href="#">213 - 233</a> | (+) |
| <b>GXP_1713</b> [ <a href="#">GXP_1713</a> ] (1 - 680)<br><b>Gabrd</b> , GXL_1439, GeneID: 29689, Rattus norvegicus chr. 5<br>gamma-aminobutyric acid A receptor, delta                                 | <a href="#">EGRF-SP1F</a> | <a href="#">454 - 432</a> | (-) |
| <b>GXP_1416639</b> [ <a href="#">GXP_1416639</a> ] (1 - 602)<br><b>Pla2g5</b> , GXL_1442, GeneID: 29354, Rattus norvegicus chr. 5<br>phospholipase A2, group V                                          | <a href="#">EGRF-SP1F</a> | <a href="#">539 - 559</a> | (+) |
| <b>GXP_1757</b> [ <a href="#">GXP_1757</a> ] (1 - 630)<br><b>Tesk1</b> , GXL_1483, GeneID: 29460, Rattus norvegicus chr. 5<br>testis specific protein kinase 1                                          | <a href="#">EGRF-SP1F</a> | <a href="#">602 - 582</a> | (-) |
| <b>GXP_1415804</b> [ <a href="#">GXP_1415804</a> ] (1 - 613)<br><b>Tesk1</b> , GXL_1483, GeneID: 29460, Rattus norvegicus chr. 5<br>testis specific protein kinase 1                                    | <a href="#">EGRF-SP1F</a> | <a href="#">297 - 277</a> | (-) |
| <b>GXP_1763</b> [ <a href="#">GXP_1763</a> ] (1 - 614)<br><b>Tnfrsf1b</b> , GXL_1489, GeneID: 156767, Rattus norvegicus chr. 5<br>tumor necrosis factor receptor superfamily, member 1b                 | <a href="#">EGRF-SP1F</a> | <a href="#">440 - 464</a> | (+) |
| <b>GXP_1775</b> [ <a href="#">GXP_1775</a> ] (1 - 601)<br><b>Pomgnt1</b> , GXL_1501, GeneID: 362567, Rattus norvegicus chr. 5<br>protein O-linked mannose beta1, 2-N-acetylglucosaminyltransferase      | <a href="#">EGRF-SP1F</a> | <a href="#">496 - 474</a> | (-) |
| <b>GXP_1789</b> [ <a href="#">GXP_1789</a> ] (1 - 671)<br><b>Atp6v1g1_predicted</b> , GXL_1514, GeneID: 298103, Rattus norvegicus chr. 5<br>ATPase, H transporting, lysosomal V1 subunit G1 (predicted) | <a href="#">EGRF-SP1F</a> | <a href="#">431 - 453</a> | (+) |
| <b>GXP_1826</b> [ <a href="#">GXP_1826</a> ] (1 - 662)<br><b>Ubap1</b> , GXL_1551, GeneID: 362502, Rattus norvegicus chr. 5<br>ubiquitin-associated protein 1                                           | <a href="#">EGRF-SP1F</a> | <a href="#">496 - 475</a> | (-) |
| <b>GXP_1416627</b> [ <a href="#">GXP_1416627</a> ] (1 - 784)<br><b>Pink1_predicted</b> , GXL_1553, GeneID: 298575, Rattus norvegicus chr. 5<br>PTEN induced putative kinase 1 (predicted)               | <a href="#">EGRF-SP1F</a> | <a href="#">264 - 242</a> | (-) |
| <b>GXP_1829</b> [ <a href="#">GXP_1829</a> ] (1 - 916)<br><b>Msc_predicted</b> , GXL_1554, GeneID: 312897, Rattus norvegicus chr. 5<br>musculin (predicted)                                             | <a href="#">EGRF-SP1F</a> | <a href="#">466 - 489</a> | (+) |
| <b>GXP_1416092</b> [ <a href="#">GXP_1416092</a> ] (1 - 602)<br><b>Nfia</b> , GXL_1576, GeneID: 25492, Rattus norvegicus chr. 5<br>nuclear factor I/A                                                   | <a href="#">EGRF-SP1F</a> | <a href="#">191 - 171</a> | (-) |
| <b>GXP_1416094</b> [ <a href="#">GXP_1416094</a> ] (1 - 601)<br><b>Nfia</b> , GXL_1576, GeneID: 25492, Rattus norvegicus chr. 5<br>nuclear factor I/A                                                   | <a href="#">EGRF-SP1F</a> | <a href="#">193 - 173</a> | (-) |
|                                                                                                                                                                                                         | <a href="#">EGRF-SP1F</a> | <a href="#">331 - 352</a> | (+) |
|                                                                                                                                                                                                         | <a href="#">EGRF-SP1F</a> | <a href="#">232 - 252</a> | (+) |

|                                                                                                                                                     |                           |                           |     |
|-----------------------------------------------------------------------------------------------------------------------------------------------------|---------------------------|---------------------------|-----|
| <b>GXP_1854</b> [ <a href="#">GXP_1854</a> ] (1 - 618)                                                                                              | <a href="#">EGRF-SP1F</a> | <a href="#">330 - 351</a> | (+) |
| <b>Eps15</b> , GXL_1579, GeneID: 313474, Rattus norvegicus chr. 5<br>epidermal growth factor receptor pathway substrate 15                          | <a href="#">EGRF-SP1F</a> | <a href="#">485 - 463</a> | (-) |
|                                                                                                                                                     | <a href="#">EGRF-SP1F</a> | <a href="#">490 - 468</a> | (-) |
| <b>GXP_1867</b> [ <a href="#">GXP_1867</a> ] (1 - 601)                                                                                              | <a href="#">EGRF-SP1F</a> | <a href="#">428 - 449</a> | (+) |
| <b>Tmeff1</b> , GXL_1591, GeneID: 63845, Rattus norvegicus chr. 5<br>transmembrane protein with EGF-like and two follistatin-like domains 1         |                           |                           |     |
| <b>GXP_1890</b> [ <a href="#">GXP_1890</a> ] (1 - 674)                                                                                              | <a href="#">EGRF-SP1F</a> | <a href="#">502 - 480</a> | (-) |
| <b>Alpl</b> , GXL_1614, GeneID: 25586, Rattus norvegicus chr. 5<br>alkaline phosphatase, tissue-nonspecific                                         |                           |                           |     |
| <b>GXP_1168112</b> [ <a href="#">GXP_1168112</a> ] (1 - 601)                                                                                        | <a href="#">EGRF-SP1F</a> | <a href="#">362 - 340</a> | (-) |
| <b>Alpl</b> , GXL_1614, GeneID: 25586, Rattus norvegicus chr. 5<br>alkaline phosphatase, tissue-nonspecific                                         |                           |                           |     |
| <b>GXP_1891</b> [ <a href="#">GXP_1891</a> ] (1 - 1032)                                                                                             | <a href="#">EGRF-SP1F</a> | <a href="#">319 - 341</a> | (+) |
| <b>Per3</b> , GXL_1615, GeneID: 78962, Rattus norvegicus chr. 5<br>period homolog 3 (Drosophila)                                                    |                           |                           |     |
| <b>GXP_1897</b> [ <a href="#">GXP_1897</a> ] (1 - 683)                                                                                              | <a href="#">EGRF-SP1F</a> | <a href="#">289 - 309</a> | (+) |
| <b>Ssbp3</b> , GXL_1621, GeneID: 84354, Rattus norvegicus chr. 5<br>single stranded DNA binding protein 3                                           | <a href="#">EGRF-SP1F</a> | <a href="#">588 - 567</a> | (-) |
|                                                                                                                                                     | <a href="#">EGRF-SP1F</a> | <a href="#">652 - 630</a> | (-) |
| <b>GXP_1416170</b> [ <a href="#">GXP_1416170</a> ] (1 - 603)                                                                                        | <a href="#">EGRF-SP1F</a> | <a href="#">161 - 138</a> | (-) |
| <b>Ssbp3</b> , GXL_1621, GeneID: 84354, Rattus norvegicus chr. 5<br>single stranded DNA binding protein 3                                           |                           |                           |     |
| <b>GXP_1898</b> [ <a href="#">GXP_1898</a> ] (1 - 1134)                                                                                             | <a href="#">EGRF-SP1F</a> | <a href="#">608 - 586</a> | (-) |
| <b>Ugcg</b> , GXL_1622, GeneID: 83626, Rattus norvegicus chr. 5<br>UDP-glucose ceramide glucosyltransferase                                         |                           |                           |     |
| <b>GXP_1905</b> [ <a href="#">GXP_1905</a> ] (1 - 602)                                                                                              | <a href="#">EGRF-SP1F</a> | <a href="#">111 - 133</a> | (+) |
| <b>Spsb1 predicted</b> , GXL_1629, GeneID: 313722, Rattus norvegicus chr. 5<br>splA/ryanodine receptor domain and SOCS box containing 1 (predicted) | <a href="#">EGRF-SP1F</a> | <a href="#">115 - 138</a> | (+) |
|                                                                                                                                                     | <a href="#">EGRF-SP1F</a> | <a href="#">315 - 292</a> | (-) |
| <b>GXP_1416770</b> [ <a href="#">GXP_1416770</a> ] (1 - 640)                                                                                        | <a href="#">EGRF-SP1F</a> | <a href="#">319 - 297</a> | (-) |
| <b>Spsb1 predicted</b> , GXL_1629, GeneID: 313722, Rattus norvegicus chr. 5<br>splA/ryanodine receptor domain and SOCS box containing 1 (predicted) | <a href="#">EGRF-SP1F</a> | <a href="#">324 - 303</a> | (-) |
|                                                                                                                                                     | <a href="#">EGRF-SP1F</a> | <a href="#">331 - 308</a> | (-) |
| <b>GXP_1913</b> [ <a href="#">GXP_1913</a> ] (1 - 985)                                                                                              | <a href="#">EGRF-SP1F</a> | <a href="#">615 - 637</a> | (+) |
| <b>Pdpn</b> , GXL_1637, GeneID: 54320, Rattus norvegicus chr. 5<br>podoplanin                                                                       | <a href="#">EGRF-SP1F</a> | <a href="#">619 - 643</a> | (+) |
| <b>GXP_1917</b> [ <a href="#">GXP_1917</a> ] (1 - 601)                                                                                              | <a href="#">EGRF-SP1F</a> | <a href="#">405 - 428</a> | (+) |
| <b>Unc13b</b> , GXL_1641, GeneID: 64830, Rattus norvegicus chr. 5<br>unc-13 homolog B (C. elegans)                                                  |                           |                           |     |
| <b>GXP_1415859</b> [ <a href="#">GXP_1415859</a> ] (1 - 602)                                                                                        | <a href="#">EGRF-SP1F</a> | <a href="#">311 - 291</a> | (-) |
| <b>Tdrd7</b> , GXL_1644, GeneID: 85425, Rattus norvegicus chr. 5                                                                                    |                           |                           |     |



tudor domain containing 7

**GXP\_1417545** [[GXP\\_1417545](#)] (1 - 604)**Npuk68**, GXL\_10174, GeneID: 192359, Rattus norvegicus chr. 6  
nuclear protein UKp68**GXP\_12416** [[GXP\\_12416](#)] (1 - 706)**Nrcam**, GXL\_10179, GeneID: 497815, Rattus norvegicus chr. 6  
neuron-glia-CAM-related cell adhesion molecule**GXP\_12433** [[GXP\\_12433](#)] (1 - 601)**Crip2**, GXL\_10195, GeneID: 338401, Rattus norvegicus chr. 6  
cysteine-rich protein 2**GXP\_12478** [[GXP\\_12478](#)] (1 - 1313)**Rhoj**, GXL\_10240, GeneID: 299145, Rattus norvegicus chr. 6  
ras homolog gene family, member J**GXP\_12489** [[GXP\\_12489](#)] (1 - 850)**Cgref1**, GXL\_10251, GeneID: 245918, Rattus norvegicus chr. 6  
cell growth regulator with EF hand domain 1**GXP\_1417032** [[GXP\\_1417032](#)] (1 - 601)**Cgref1**, GXL\_10251, GeneID: 245918, Rattus norvegicus chr. 6  
cell growth regulator with EF hand domain 1**GXP\_12520** [[GXP\\_12520](#)] (1 - 609)**Slc5a6**, GXL\_10282, GeneID: 170551, Rattus norvegicus chr. 6  
solute carrier family 5 (sodium-dependent vitamin transporter), member 6**GXP\_1168670** [[GXP\\_1168670](#)] (1 - 904)**Slc5a6**, GXL\_10282, GeneID: 170551, Rattus norvegicus chr. 6  
solute carrier family 5 (sodium-dependent vitamin transporter), member 6**GXP\_12531** [[GXP\\_12531](#)] (1 - 601)**Dnmt3a**, GXL\_10291, GeneID: 444984, Rattus norvegicus chr. 6  
DNA methyltransferase 3A**GXP\_12533** [[GXP\\_12533](#)] (1 - 601)**Foxg1**, GXL\_10293, GeneID: 24370, Rattus norvegicus chr. 6  
forkhead box G1**GXP\_12580** [[GXP\\_12580](#)] (1 - 601)**Smoc1**, GXL\_10340, GeneID: 314280, Rattus norvegicus chr. 6  
SPARC-related modular calcium binding protein 1**GXP\_12584** [[GXP\\_12584](#)] (1 - 757)**Rock2**, GXL\_10344, GeneID: 25537, Rattus norvegicus chr. 6

|                           |                           |     |
|---------------------------|---------------------------|-----|
| <a href="#">EGRF-SP1F</a> | <a href="#">352 - 373</a> | (+) |
| <a href="#">EGRF-SP1F</a> | <a href="#">346 - 322</a> | (-) |
| <a href="#">EGRF-SP1F</a> | <a href="#">410 - 386</a> | (-) |
| <a href="#">EGRF-SP1F</a> | <a href="#">515 - 491</a> | (-) |
| <a href="#">EGRF-SP1F</a> | <a href="#">508 - 484</a> | (-) |
| <a href="#">EGRF-SP1F</a> | <a href="#">206 - 186</a> | (-) |
| <a href="#">EGRF-SP1F</a> | <a href="#">821 - 800</a> | (-) |
| <a href="#">EGRF-SP1F</a> | <a href="#">333 - 356</a> | (+) |
| <a href="#">EGRF-SP1F</a> | <a href="#">250 - 228</a> | (-) |
| <a href="#">EGRF-SP1F</a> | <a href="#">443 - 421</a> | (-) |
| <a href="#">EGRF-SP1F</a> | <a href="#">789 - 767</a> | (-) |
| <a href="#">EGRF-SP1F</a> | <a href="#">449 - 469</a> | (+) |
| <a href="#">EGRF-SP1F</a> | <a href="#">470 - 492</a> | (+) |
| <a href="#">EGRF-SP1F</a> | <a href="#">488 - 509</a> | (+) |
| <a href="#">EGRF-SP1F</a> | <a href="#">512 - 536</a> | (+) |
| <a href="#">EGRF-SP1F</a> | <a href="#">296 - 273</a> | (-) |
| <a href="#">EGRF-SP1F</a> | <a href="#">310 - 287</a> | (-) |
| <a href="#">EGRF-SP1F</a> | <a href="#">315 - 292</a> | (-) |
| <a href="#">EGRF-SP1F</a> | <a href="#">321 - 298</a> | (-) |
| <a href="#">EGRF-SP1F</a> | <a href="#">327 - 303</a> | (-) |
| <a href="#">EGRF-SP1F</a> | <a href="#">89 - 69</a>   | (-) |
| <a href="#">EGRF-SP1F</a> | <a href="#">186 - 207</a> | (+) |
| <a href="#">EGRF-SP1F</a> | <a href="#">296 - 273</a> | (-) |

|                                                                                                                                    |                  |                  |     |
|------------------------------------------------------------------------------------------------------------------------------------|------------------|------------------|-----|
| Rho-associated coiled-coil forming kinase 2                                                                                        | <u>EGRF-SP1F</u> | <u>640 - 617</u> | (-) |
| <b>GXP_12617</b> [ <u>GXP_12617</u> ] (1 - 630)                                                                                    | <u>EGRF-SP1F</u> | <u>45 - 24</u>   | (-) |
| <b>Hpcal1</b> , GXL_10377, GeneID: 50871, Rattus norvegicus chr. 6<br>hippocalcin-like 1                                           | <u>EGRF-SP1F</u> | <u>48 - 28</u>   | (-) |
| <b>GXP_1417113</b> [ <u>GXP_1417113</u> ] (1 - 601)                                                                                | <u>EGRF-SP1F</u> | <u>202 - 179</u> | (-) |
| <b>Hpcal1</b> , GXL_10377, GeneID: 50871, Rattus norvegicus chr. 6<br>hippocalcin-like 1                                           | <u>EGRF-SP1F</u> | <u>490 - 510</u> | (+) |
| <b>GXP_1168703</b> [ <u>GXP_1168703</u> ] (1 - 784)                                                                                | <u>EGRF-SP1F</u> | <u>275 - 297</u> | (+) |
| <b>Dtnb</b> , GXL_10420, GeneID: 362715, Rattus norvegicus chr. 6<br>dystrobrevin, beta                                            | <u>EGRF-SP1F</u> | <u>565 - 542</u> | (-) |
| <b>GXP_12666</b> [ <u>GXP_12666</u> ] (1 - 890)                                                                                    | <u>EGRF-SP1F</u> | <u>760 - 781</u> | (+) |
| <b>Ppm1a</b> , GXL_10425, GeneID: 24666, Rattus norvegicus chr. 6<br>protein phosphatase 1A, magnesium dependent, alpha isoform    | <u>EGRF-SP1F</u> | <u>22 - 45</u>   | (+) |
| <b>GXP_1169102</b> [ <u>GXP_1169102</u> ] (1 - 601)                                                                                | <u>EGRF-SP1F</u> | <u>889 - 866</u> | (-) |
| <b>Ppm1a</b> , GXL_10425, GeneID: 24666, Rattus norvegicus chr. 6<br>protein phosphatase 1A, magnesium dependent, alpha isoform    | <u>EGRF-SP1F</u> | <u>272 - 296</u> | (+) |
| <b>GXP_12672</b> [ <u>GXP_12672</u> ] (1 - 926)                                                                                    | <u>EGRF-SP1F</u> | <u>510 - 486</u> | (-) |
| <b>Glrx5 predicted</b> , GXL_10431, GeneID: 362776, Rattus norvegicus chr. 6<br>glutaredoxin 5 homolog (S. cerevisiae) (predicted) | <u>EGRF-SP1F</u> | <u>694 - 674</u> | (-) |
| <b>GXP_12675</b> [ <u>GXP_12675</u> ] (1 - 852)                                                                                    | <u>EGRF-SP1F</u> | <u>229 - 209</u> | (-) |
| <b>Prkch</b> , GXL_10434, GeneID: 81749, Rattus norvegicus chr. 6<br>protein kinase C, eta                                         | <u>EGRF-SP1F</u> | <u>370 - 390</u> | (+) |
| <b>GXP_12681</b> [ <u>GXP_12681</u> ] (1 - 601)                                                                                    | <u>EGRF-SP1F</u> | <u>426 - 450</u> | (+) |
| <b>Yy1</b> , GXL_10440, GeneID: 24919, Rattus norvegicus chr. 6<br>YY1 transcription factor                                        | <u>EGRF-SP1F</u> | <u>408 - 384</u> | (-) |
| <b>GXP_1417434</b> [ <u>GXP_1417434</u> ] (1 - 775)                                                                                | <u>EGRF-SP1F</u> | <u>270 - 249</u> | (-) |
| <b>Sfrs5</b> , GXL_10459, GeneID: 29667, Rattus norvegicus chr. 6<br>splicing factor, arginine/serine-rich 5                       | <u>EGRF-SP1F</u> | <u>379 - 400</u> | (+) |
| <b>GXP_1417644</b> [ <u>GXP_1417644</u> ] (1 - 601)                                                                                | <u>EGRF-SP1F</u> | <u>379 - 400</u> | (+) |
| <b>Begain</b> , GXL_10479, GeneID: 79146, Rattus norvegicus chr. 6<br>brain-enriched guanylate kinase-associated                   | <u>EGRF-SP1F</u> | <u>179 - 157</u> | (-) |
| <b>GXP_1168719</b> [ <u>GXP_1168719</u> ] (1 - 601)                                                                                | <u>EGRF-SP1F</u> | <u>956 - 977</u> | (+) |
| <b>Adcy3</b> , GXL_10517, GeneID: 64508, Rattus norvegicus chr. 6<br>adenylate cyclase 3                                           | <u>EGRF-SP1F</u> | <u>179 - 157</u> | (-) |
| <b>GXP_1417058</b> [ <u>GXP_1417058</u> ] (1 - 944)                                                                                | <u>EGRF-SP1F</u> | <u>179 - 157</u> | (-) |
| <b>Adcy3</b> , GXL_10517, GeneID: 64508, Rattus norvegicus chr. 6<br>adenylate cyclase 3                                           | <u>EGRF-SP1F</u> | <u>956 - 977</u> | (+) |
| <b>GXP_1414890</b> [ <u>GXP_1414890</u> ] (1 - 1046)                                                                               | <u>EGRF-SP1F</u> | <u>956 - 977</u> | (+) |
| <b>Chn2</b> , GXL_15677, GeneID: 84031, Rattus norvegicus chr. 4                                                                   |                  |                  |     |

|                                                                                      |                           |                           |     |
|--------------------------------------------------------------------------------------|---------------------------|---------------------------|-----|
| chimerin (chimaerin) 2                                                               |                           |                           |     |
| <b>GXP_1414892</b> [ <a href="#">GXP_1414892</a> ] (1 - 601)                         | <a href="#">EGRF-SP1F</a> | <a href="#">527 - 505</a> | (-) |
| <b>Chn2</b> , GXL_15677, GeneID: 84031, Rattus norvegicus chr. 4                     |                           |                           |     |
| chimerin (chimaerin) 2                                                               | <a href="#">EGRF-SP1F</a> | <a href="#">529 - 507</a> | (-) |
| <b>GXP_19429</b> [ <a href="#">GXP_19429</a> ] (1 - 601)                             |                           |                           |     |
| <b>Rtkn</b> , GXL_15689, GeneID: 297383, Rattus norvegicus chr. 4                    | <a href="#">EGRF-SP1F</a> | <a href="#">495 - 515</a> | (+) |
| rhotekin                                                                             |                           |                           |     |
| <b>GXP_19431</b> [ <a href="#">GXP_19431</a> ] (1 - 624)                             |                           |                           |     |
| <b>Sftpb</b> , GXL_15691, GeneID: 192155, Rattus norvegicus chr. 4                   | <a href="#">EGRF-SP1F</a> | <a href="#">87 - 65</a>   | (-) |
| surfactant associated protein B                                                      |                           |                           |     |
| <b>GXP_19451</b> [ <a href="#">GXP_19451</a> ] (1 - 601)                             | <a href="#">EGRF-SP1F</a> | <a href="#">90 - 112</a>  | (+) |
| <b>Oact5</b> , GXL_15710, GeneID: 362434, Rattus norvegicus chr. 4                   | <a href="#">EGRF-SP1F</a> | <a href="#">98 - 118</a>  | (+) |
| O-acyltransferase (membrane bound) domain containing 5                               |                           |                           |     |
| <b>GXP_19467</b> [ <a href="#">GXP_19467</a> ] (1 - 640)                             |                           |                           |     |
| <b>Npy</b> , GXL_15726, GeneID: 24604, Rattus norvegicus chr. 4                      | <a href="#">EGRF-SP1F</a> | <a href="#">371 - 351</a> | (-) |
| neuropeptide Y                                                                       |                           |                           |     |
| <b>GXP_1414757</b> [ <a href="#">GXP_1414757</a> ] (1 - 601)                         |                           |                           |     |
| <b>Tbxas1</b> , GXL_15732, GeneID: 24886, Rattus norvegicus chr. 4                   | <a href="#">EGRF-SP1F</a> | <a href="#">250 - 270</a> | (+) |
| thromboxane A synthase 1                                                             |                           |                           |     |
| <b>GXP_19492</b> [ <a href="#">GXP_19492</a> ] (1 - 601)                             |                           |                           |     |
| <b>V1rb6</b> , GXL_15749, GeneID: 494310, Rattus norvegicus chr. 4                   | <a href="#">EGRF-SP1F</a> | <a href="#">215 - 195</a> | (-) |
| vomeronasal V1r-type receptor V1rb6                                                  |                           |                           |     |
| <b>GXP_1415212</b> [ <a href="#">GXP_1415212</a> ] (1 - 641)                         |                           |                           |     |
| <b>Slc6a1</b> , GXL_15750, GeneID: 79212, Rattus norvegicus chr. 4                   | <a href="#">EGRF-SP1F</a> | <a href="#">469 - 490</a> | (+) |
| solute carrier family 6 (neurotransmitter transporter, GABA), member 1               |                           |                           |     |
| <b>GXP_19501</b> [ <a href="#">GXP_19501</a> ] (1 - 761)                             |                           |                           |     |
| <b>Cav2</b> , GXL_15758, GeneID: 363425, Rattus norvegicus chr. 4                    | <a href="#">EGRF-SP1F</a> | <a href="#">444 - 464</a> | (+) |
| caveolin 2                                                                           |                           |                           |     |
| <b>GXP_19504</b> [ <a href="#">GXP_19504</a> ] (1 - 1089)                            | <a href="#">EGRF-SP1F</a> | <a href="#">700 - 678</a> | (-) |
| <b>Ppp4r2</b> <b>predicted</b> , GXL_15761, GeneID: 297486, Rattus norvegicus chr. 4 | <a href="#">EGRF-SP1F</a> | <a href="#">901 - 877</a> | (-) |
| protein phosphatase 4, regulatory subunit 2 (predicted)                              | <a href="#">EGRF-SP1F</a> | <a href="#">913 - 889</a> | (-) |
|                                                                                      | <a href="#">EGRF-SP1F</a> | <a href="#">917 - 895</a> | (-) |
| <b>GXP_1414450</b> [ <a href="#">GXP_1414450</a> ] (1 - 1120)                        |                           |                           |     |
| <b>Prkag2</b> , GXL_15763, GeneID: 373545, Rattus norvegicus chr. 4                  | <a href="#">EGRF-SP1F</a> | <a href="#">855 - 877</a> | (+) |
| protein kinase, AMP-activated, gamma 2 non-catalytic subunit                         |                           |                           |     |
| <b>GXP_19524</b> [ <a href="#">GXP_19524</a> ] (1 - 665)                             |                           |                           |     |
| <b>Zfp384</b> , GXL_15781, GeneID: 171018, Rattus norvegicus chr. 4                  | <a href="#">EGRF-SP1F</a> | <a href="#">375 - 397</a> | (+) |
| zinc finger protein 384                                                              |                           |                           |     |
| <b>GXP_515772</b> [ <a href="#">GXP_515772</a> ] (1 - 668)                           | <a href="#">EGRF-SP1F</a> | <a href="#">311 - 333</a> | (+) |

**Zfp384**, GXL\_15781, GeneID: 171018, Rattus norvegicus chr. 4  
zinc finger protein 384

**GXP\_1415353** [[GXP\\_1415353](#)] (1 - 623)

**Zfp384**, GXL\_15781, GeneID: 171018, Rattus norvegicus chr. 4  
zinc finger protein 384

**GXP\_1415354** [[GXP\\_1415354](#)] (1 - 838)

**Zfp384**, GXL\_15781, GeneID: 171018, Rattus norvegicus chr. 4  
zinc finger protein 384

**GXP\_19534** [[GXP\\_19534](#)] (1 - 764)

**Arf5**, GXL\_15791, GeneID: 79117, Rattus norvegicus chr. 4  
ADP-ribosylation factor 5

**GXP\_1414617** [[GXP\\_1414617](#)] (1 - 751)

**Met**, GXL\_15792, GeneID: 24553, Rattus norvegicus chr. 4  
met proto-oncogene

**GXP\_19543** [[GXP\\_19543](#)] (1 - 921)

**Bhlhb2**, GXL\_15800, GeneID: 79431, Rattus norvegicus chr. 4  
basic helix-loop-helix domain containing, class B2

**GXP\_860742** [[GXP\\_860742](#)] (1 - 601)

**Grid2**, GXL\_15805, GeneID: 79220, Rattus norvegicus chr. 4  
glutamate receptor, ionotropic, delta 2

**GXP\_19550** [[GXP\\_19550](#)] (1 - 601)

**V1rb5**, GXL\_15806, GeneID: 497787, Rattus norvegicus chr. 4  
vomeronasal V1r-type receptor V1rb5

**GXP\_19559** [[GXP\\_19559](#)] (1 - 981)

**Cyp51**, GXL\_15815, GeneID: 25427, Rattus norvegicus chr. 4  
cytochrome P450, subfamily 51

**GXP\_19577** [[GXP\\_19577](#)] (1 - 1032)

**Tacr1**, GXL\_15832, GeneID: 24807, Rattus norvegicus chr. 4  
tachykinin receptor 1

**GXP\_19587** [[GXP\\_19587](#)] (1 - 675)

**C1galt1**, GXL\_15842, GeneID: 65044, Rattus norvegicus chr. 4  
core 1 UDP-galactose:N-acetylgalactosamine-alpha-R beta 1,3-galactosyltransferase

**GXP\_19599** [[GXP\\_19599](#)] (1 - 1396)

**Tm6p1**, GXL\_15854, GeneID: 245966, Rattus norvegicus chr. 4  
fasting-inducible integral membrane protein TM6P1

**GXP\_19604** [[GXP\\_19604](#)] (1 - 851)

**Mfap5\_predicted**, GXL\_15859, GeneID: 362429, Rattus norvegicus chr. 4  
microfibrillar associated protein 5 (predicted)

**GXP\_1166289** [[GXP\\_1166289](#)] (1 - 601)

**Mfap5\_predicted**, GXL\_15859, GeneID: 362429, Rattus norvegicus chr. 4

[EGRF-SP1F](#) [506 - 528](#) (+)

[EGRF-SP1F](#) [93 - 115](#) (+)

[EGRF-SP1F](#) [500 - 477](#) (-)

[EGRF-SP1F](#) [220 - 197](#) (-)

[EGRF-SP1F](#) [272 - 292](#) (+)

[EGRF-SP1F](#) [253 - 229](#) (-)

[EGRF-SP1F](#) [466 - 489](#) (+)

[EGRF-SP1F](#) [265 - 287](#) (+)

[EGRF-SP1F](#) [170 - 150](#) (-)

[EGRF-SP1F](#) [659 - 681](#) (+)

[EGRF-SP1F](#) [121 - 143](#) (+)

[EGRF-SP1F](#) [448 - 468](#) (+)

[EGRF-SP1F](#) [1114 - 1136](#) (+)

[EGRF-SP1F](#) [632 - 652](#) (+)

[EGRF-SP1F](#) [634 - 654](#) (+)

[EGRF-SP1F](#) [195 - 172](#) (-)

microfibrillar associated protein 5 (predicted)

**GXP\_19608** [[GXP\\_19608](#)] (1 - 663)

**Tmub1**, GXL\_15863, GeneID: 362301, Rattus norvegicus chr. 4  
transmembrane and ubiquitin-like domain containing 1

**GXP\_1415018** [[GXP\\_1415018](#)] (1 - 601)

**Dctn1**, GXL\_15878, GeneID: 29167, Rattus norvegicus chr. 4  
dynactin 1

**GXP\_19631** [[GXP\\_19631](#)] (1 - 691)

**Mlf2 predicted**, GXL\_15886, GeneID: 312709, Rattus norvegicus chr. 4  
myeloid leukemia factor 2 (predicted)

**GXP\_19645** [[GXP\\_19645](#)] (1 - 601)

**Syn2**, GXL\_15900, GeneID: 29179, Rattus norvegicus chr. 4  
synapsin II

**GXP\_19646** [[GXP\\_19646](#)] (1 - 601)

**Fkbp9**, GXL\_15901, GeneID: 297123, Rattus norvegicus chr. 4  
FK506 binding protein 9

**GXP\_19652** [[GXP\\_19652](#)] (1 - 601)

**Casp2**, GXL\_15907, GeneID: 64314, Rattus norvegicus chr. 4  
caspase 2

**GXP\_1414477** [[GXP\\_1414477](#)] (1 - 602)

**Kcnh2**, GXL\_15922, GeneID: 117018, Rattus norvegicus chr. 4  
potassium voltage-gated channel, subfamily H (eag-related), member 2

**GXP\_1414479** [[GXP\\_1414479](#)] (1 - 622)

**Kcnh2**, GXL\_15922, GeneID: 117018, Rattus norvegicus chr. 4  
potassium voltage-gated channel, subfamily H (eag-related), member 2

**GXP\_19692** [[GXP\\_19692](#)] (1 - 753)

**Retsat**, GXL\_15947, GeneID: 246298, Rattus norvegicus chr. 4  
all-trans-13,14-dihydroretinol saturase

**GXP\_860704** [[GXP\\_860704](#)] (1 - 601)

**Cr16**, GXL\_15950, GeneID: 259242, Rattus norvegicus chr. 4  
SH3 domain binding protein CR16

**GXP\_1414894** [[GXP\\_1414894](#)] (1 - 601)

**Cr16**, GXL\_15950, GeneID: 259242, Rattus norvegicus chr. 4  
SH3 domain binding protein CR16

**GXP\_19700** [[GXP\\_19700](#)] (1 - 601)

**Smarcd3**, GXL\_15955, GeneID: 296732, Rattus norvegicus chr. 4  
SWI/SNF related, matrix associated, actin dependent regulator of chromatin, subfamily d, member 3

**GXP\_1414457** [[GXP\\_1414457](#)] (1 - 1011)

[EGRF-SP1F](#) [390 - 368](#) (-)

[EGRF-SP1F](#) [397 - 377](#) (-)

[EGRF-SP1F](#) [424 - 445](#) (+)

[EGRF-SP1F](#) [427 - 448](#) (+)

[EGRF-SP1F](#) [145 - 123](#) (-)

[EGRF-SP1F](#) [524 - 502](#) (-)

[EGRF-SP1F](#) [442 - 419](#) (-)

[EGRF-SP1F](#) [560 - 537](#) (-)

[EGRF-SP1F](#) [566 - 542](#) (-)

[EGRF-SP1F](#) [483 - 463](#) (-)

[EGRF-SP1F](#) [320 - 344](#) (+)

[EGRF-SP1F](#) [104 - 80](#) (-)

[EGRF-SP1F](#) [106 - 82](#) (-)

[EGRF-SP1F](#) [97 - 117](#) (+)

[EGRF-SP1F](#) [415 - 437](#) (+)

[EGRF-SP1F](#) [419 - 439](#) (+)

[EGRF-SP1F](#) [422 - 443](#) (+)

[EGRF-SP1F](#) [424 - 445](#) (+)

[EGRF-SP1F](#) [735 - 713](#) (-)

|                                                                                                                                                                                  |                  |                  |     |
|----------------------------------------------------------------------------------------------------------------------------------------------------------------------------------|------------------|------------------|-----|
| <b><u>Smarcd3</u></b> , GXL_15955, GeneID: 296732, Rattus norvegicus chr. 4<br>SWI/SNF related, matrix associated, actin dependent regulator of chromatin, subfamily d, member 3 | <u>EGRF-SP1F</u> | <u>738 - 717</u> | (-) |
| <b>GXP_19728</b> [ <u>GXP_19728</u> ] (1 - 697)                                                                                                                                  |                  |                  |     |
| <b><u>Akap3</u></b> , GXL_15982, GeneID: 312720, Rattus norvegicus chr. 4<br>A kinase (PRKA) anchor protein 3                                                                    | <u>EGRF-SP1F</u> | <u>30 - 10</u>   | (-) |
| <b>GXP_19752</b> [ <u>GXP_19752</u> ] (1 - 716)                                                                                                                                  |                  |                  |     |
| <b><u>Cxcl12</u></b> , GXL_16006, GeneID: 24772, Rattus norvegicus chr. 4<br>chemokine (C-X-C motif) ligand 12                                                                   | <u>EGRF-SP1F</u> | <u>593 - 613</u> | (+) |
| <b>GXP_1415200</b> [ <u>GXP_1415200</u> ] (1 - 602)                                                                                                                              |                  |                  |     |
| <b><u>Il17re</u></b> , GXL_16035, GeneID: 362417, Rattus norvegicus chr. 4<br>interleukin 17 receptor E                                                                          | <u>EGRF-SP1F</u> | <u>570 - 590</u> | (+) |
| <b>GXP_19786</b> [ <u>GXP_19786</u> ] (1 - 608)                                                                                                                                  |                  |                  |     |
| <b><u>Mrps35 predicted</u></b> , GXL_16040, GeneID: 297727, Rattus norvegicus chr. 4<br>mitochondrial ribosomal protein S35 (predicted)                                          | <u>EGRF-SP1F</u> | <u>474 - 496</u> | (+) |
| <b>GXP_1415225</b> [ <u>GXP_1415225</u> ] (1 - 601)                                                                                                                              |                  |                  |     |
| <b><u>Pparg</u></b> , GXL_16044, GeneID: 25664, Rattus norvegicus chr. 4<br>peroxisome proliferator activated receptor gamma                                                     | <u>EGRF-SP1F</u> | <u>324 - 301</u> | (-) |
| <b>GXP_19797</b> [ <u>GXP_19797</u> ] (1 - 897)                                                                                                                                  |                  |                  |     |
| <b><u>Reln</u></b> , GXL_16051, GeneID: 24718, Rattus norvegicus chr. 4<br>reelin                                                                                                | <u>EGRF-SP1F</u> | <u>350 - 330</u> | (-) |
| <b>GXP_19798</b> [ <u>GXP_19798</u> ] (1 - 788)                                                                                                                                  |                  |                  |     |
| <b><u>Slc6a11</u></b> , GXL_16052, GeneID: 79213, Rattus norvegicus chr. 4<br>solute carrier family 6 (neurotransmitter transporter, GABA), member 11                            | <u>EGRF-SP1F</u> | <u>412 - 392</u> | (-) |
| <b>GXP_1415019</b> [ <u>GXP_1415019</u> ] (1 - 603)                                                                                                                              |                  |                  |     |
| <b><u>Slc4a5</u></b> , GXL_16055, GeneID: 297386, Rattus norvegicus chr. 4<br>solute carrier family 4, sodium bicarbonate cotransporter, member 5                                | <u>EGRF-SP1F</u> | <u>652 - 631</u> | (-) |
| <b>GXP_1414849</b> [ <u>GXP_1414849</u> ] (1 - 619)                                                                                                                              |                  |                  |     |
| <b><u>Abp1</u></b> , GXL_16063, GeneID: 65029, Rattus norvegicus chr. 4<br>amiloride binding protein 1 (amine oxidase, copper-containing)                                        | <u>EGRF-SP1F</u> | <u>242 - 220</u> | (-) |
| <b>GXP_19810</b> [ <u>GXP_19810</u> ] (1 - 712)                                                                                                                                  |                  |                  |     |
| <b><u>Ptpn12</u></b> , GXL_16064, GeneID: 117255, Rattus norvegicus chr. 4<br>protein tyrosine phosphatase, non-receptor type 12                                                 | <u>EGRF-SP1F</u> | <u>423 - 445</u> | (+) |
| <b>GXP_860371</b> [ <u>GXP_860371</u> ] (1 - 601)                                                                                                                                |                  |                  |     |
| <b><u>Ptpn12</u></b> , GXL_16064, GeneID: 117255, Rattus norvegicus chr. 4<br>protein tyrosine phosphatase, non-receptor type 12                                                 | <u>EGRF-SP1F</u> | <u>423 - 445</u> | (+) |
| <b>GXP_19824</b> [ <u>GXP_19824</u> ] (1 - 601)                                                                                                                                  |                  |                  |     |
| <b><u>Gpr27</u></b> , GXL_16078, GeneID: 65275, Rattus norvegicus chr. 4<br>G protein-coupled receptor 27                                                                        | <u>EGRF-SP1F</u> | <u>337 - 317</u> | (-) |
| <b>GXP_19832</b> [ <u>GXP_19832</u> ] (1 - 637)                                                                                                                                  |                  |                  |     |
| <b><u>Spsb2</u></b> , GXL_16086, GeneID: 297592, Rattus norvegicus chr. 4                                                                                                        | <u>EGRF-SP1F</u> | <u>572 - 552</u> | (-) |
|                                                                                                                                                                                  | <u>EGRF-SP1F</u> | <u>636 - 613</u> | (-) |
|                                                                                                                                                                                  | <u>EGRF-SP1F</u> | <u>562 - 542</u> | (-) |
|                                                                                                                                                                                  | <u>EGRF-SP1F</u> | <u>541 - 517</u> | (-) |
|                                                                                                                                                                                  | <u>EGRF-SP1F</u> | <u>472 - 449</u> | (-) |

splA/ryanodine receptor domain and SOCS box containing 2

**GXP\_1415343** [[GXP\\_1415343](#)] (1 - 1155)

**Spsb2**, GXL\_16086, GeneID: 297592, Rattus norvegicus chr. 4  
splA/ryanodine receptor domain and SOCS box containing 2

[EGRF-SP1F](#) [162 - 139](#) (-)

**GXP\_19844** [[GXP\\_19844](#)] (1 - 700)

**Foxm1**, GXL\_16098, GeneID: 58921, Rattus norvegicus chr. 4  
forkhead box M1

[EGRF-SP1F](#) [537 - 560](#) (+)

**GXP\_19845** [[GXP\\_19845](#)] (1 - 710)

**Bcl2l13 predicted**, GXL\_16099, GeneID: 312682, Rattus norvegicus chr. 4  
BCL2-like 13 (apoptosis facilitator) (predicted)

[EGRF-SP1F](#) [464 - 487](#) (+)

**GXP\_515687** [[GXP\\_515687](#)] (1 - 601)

**Bcl2l13 predicted**, GXL\_16099, GeneID: 312682, Rattus norvegicus chr. 4  
BCL2-like 13 (apoptosis facilitator) (predicted)

[EGRF-SP1F](#) [240 - 260](#) (+)

**GXP\_19849** [[GXP\\_19849](#)] (1 - 601)

**RSA-14-44**, GXL\_16103, GeneID: 297173, Rattus norvegicus chr. 4  
RSA-14-44 protein

[EGRF-SP1F](#) [41 - 63](#) (+)

**GXP\_22666** [[GXP\\_22666](#)] (1 - 618)

**Prkab2**, GXL\_18682, GeneID: 64562, Rattus norvegicus chr. 2  
protein kinase, AMP-activated, beta 2 non-catalytic subunit

[EGRF-SP1F](#) [450 - 427](#) (-)

**GXP\_22677** [[GXP\\_22677](#)] (1 - 1217)

**Cryz**, GXL\_18692, GeneID: 362061, Rattus norvegicus chr. 2  
crystallin, zeta

[EGRF-SP1F](#) [68 - 48](#) (-)

[EGRF-SP1F](#) [626 - 603](#) (-)

[EGRF-SP1F](#) [628 - 608](#) (-)

[EGRF-SP1F](#) [407 - 430](#) (+)

**GXP\_22685** [[GXP\\_22685](#)] (1 - 833)

**Gclm**, GXL\_18700, GeneID: 29739, Rattus norvegicus chr. 2  
glutamate cysteine ligase, modifier subunit

[EGRF-SP1F](#) [413 - 433](#) (+)

**GXP\_22690** [[GXP\\_22690](#)] (1 - 602)

**Cxxc4**, GXL\_18705, GeneID: 83824, Rattus norvegicus chr. 2  
CXXC finger 4

[EGRF-SP1F](#) [355 - 331](#) (-)

[EGRF-SP1F](#) [376 - 352](#) (-)

[EGRF-SP1F](#) [379 - 358](#) (-)

**GXP\_1412759** [[GXP\\_1412759](#)] (1 - 719)

**Cxxc4**, GXL\_18705, GeneID: 83824, Rattus norvegicus chr. 2  
CXXC finger 4

[EGRF-SP1F](#) [215 - 193](#) (-)

**GXP\_22724** [[GXP\\_22724](#)] (1 - 824)

**Cct3**, GXL\_18739, GeneID: 295230, Rattus norvegicus chr. 2  
chaperonin subunit 3 (gamma)

[EGRF-SP1F](#) [124 - 101](#) (-)

**GXP\_22737** [[GXP\\_22737](#)] (1 - 1385)

**Pias3**, GXL\_18752, GeneID: 83614, Rattus norvegicus chr. 2  
protein inhibitor of activated STAT 3

[EGRF-SP1F](#) [1189 - 1167](#) (-)

**GXP\_22740** [[GXP\\_22740](#)] (1 - 1052)

**Tspan5**, GXL\_18755, GeneID: 362048, Rattus norvegicus chr. 2

[EGRF-SP1F](#) [600 - 579](#) (-)

tetraspanin 5

**GXP\_1412790** [[GXP\\_1412790](#)] (1 - 602)**Tspan5**, GXL\_18755, GeneID: 362048, Rattus norvegicus chr. 2

tetraspanin 5

**GXP\_22752** [[GXP\\_22752](#)] (1 - 789)**Ubqln4 predicted**, GXL\_18767, GeneID: 310633, Rattus norvegicus chr. 2

ubiquilin 4 (predicted)

**GXP\_22767** [[GXP\\_22767](#)] (1 - 646)**Adar**, GXL\_18782, GeneID: 81635, Rattus norvegicus chr. 2

adenosine deaminase, RNA-specific

**GXP\_22772** [[GXP\\_22772](#)] (1 - 740)**Crabp2**, GXL\_18787, GeneID: 29563, Rattus norvegicus chr. 2

cellular retinoic acid binding protein 2

**GXP\_22775** [[GXP\\_22775](#)] (1 - 839)**Sf3b4**, GXL\_18790, GeneID: 295270, Rattus norvegicus chr. 2

splicing factor 3b, subunit 4

**GXP\_22776** [[GXP\\_22776](#)] (1 - 1247)**Ppp3ca**, GXL\_18791, GeneID: 24674, Rattus norvegicus chr. 2

protein phosphatase 3, catalytic subunit, alpha isoform

**GXP\_1412772** [[GXP\\_1412772](#)] (1 - 605)**Ppp3ca**, GXL\_18791, GeneID: 24674, Rattus norvegicus chr. 2

protein phosphatase 3, catalytic subunit, alpha isoform

**GXP\_22806** [[GXP\\_22806](#)] (1 - 665)**Plrg1**, GXL\_18820, GeneID: 60376, Rattus norvegicus chr. 2

pleiotropic regulator 1, PRL1 homolog (Arabidopsis)

**GXP\_22820** [[GXP\\_22820](#)] (1 - 1214)**Lmo4**, GXL\_18834, GeneID: 362051, Rattus norvegicus chr. 2

LIM domain only 4

**GXP\_1412808** [[GXP\\_1412808](#)] (1 - 634)**Lmo4**, GXL\_18834, GeneID: 362051, Rattus norvegicus chr. 2

LIM domain only 4

**GXP\_1412809** [[GXP\\_1412809](#)] (1 - 961)**Lmo4**, GXL\_18834, GeneID: 362051, Rattus norvegicus chr. 2

LIM domain only 4

**GXP\_22838** [[GXP\\_22838](#)] (1 - 914)**Negr1**, GXL\_18852, GeneID: 59318, Rattus norvegicus chr. 2

neuronal growth regulator 1

[EGRF-SP1F](#) [312 - 292](#) (-)[EGRF-SP1F](#) [319 - 296](#) (-)[EGRF-SP1F](#) [545 - 522](#) (-)[EGRF-SP1F](#) [547 - 527](#) (-)[EGRF-SP1F](#) [451 - 474](#) (+)[EGRF-SP1F](#) [452 - 429](#) (-)[EGRF-SP1F](#) [2 - 22](#) (+)[EGRF-SP1F](#) [21 - 45](#) (+)[EGRF-SP1F](#) [488 - 464](#) (-)[EGRF-SP1F](#) [776 - 799](#) (+)[EGRF-SP1F](#) [896 - 919](#) (+)[EGRF-SP1F](#) [127 - 107](#) (-)[EGRF-SP1F](#) [343 - 365](#) (+)[EGRF-SP1F](#) [353 - 377](#) (+)[EGRF-SP1F](#) [757 - 737](#) (-)[EGRF-SP1F](#) [1037 - 1058](#) (+)[EGRF-SP1F](#) [465 - 485](#) (+)[EGRF-SP1F](#) [171 - 191](#) (+)[EGRF-SP1F](#) [430 - 408](#) (-)[EGRF-SP1F](#) [538 - 514](#) (-)[EGRF-SP1F](#) [783 - 763](#) (-)[EGRF-SP1F](#) [666 - 646](#) (-)[EGRF-SP1F](#) [206 - 229](#) (+)



|                                                                                                                                                                                                  |                           |                             |     |
|--------------------------------------------------------------------------------------------------------------------------------------------------------------------------------------------------|---------------------------|-----------------------------|-----|
| <b>GXP_22839</b> [ <a href="#">GXP_22839</a> ] (1 - 602)<br><b>Pdgfc</b> , GXL_18853, GeneID: 79429, Rattus norvegicus chr. 2<br>platelet-derived growth factor, C polypeptide                   | <a href="#">EGRF-SP1F</a> | <a href="#">211 - 231</a>   | (+) |
| <b>GXP_22841</b> [ <a href="#">GXP_22841</a> ] (1 - 667)<br><b>Pla2g12a_predicted</b> , GXL_18855, GeneID: 362039, Rattus norvegicus chr. 2<br>phospholipase A2, group XIIA (predicted)          | <a href="#">EGRF-SP1F</a> | <a href="#">569 - 589</a>   | (+) |
| <b>GXP_22859</b> [ <a href="#">GXP_22859</a> ] (1 - 670)<br><b>S100a10</b> , GXL_18873, GeneID: 81778, Rattus norvegicus chr. 2<br>S100 calcium binding protein A10 (calpactin)                  | <a href="#">EGRF-SP1F</a> | <a href="#">431 - 408</a>   | (-) |
| <b>GXP_1412674</b> [ <a href="#">GXP_1412674</a> ] (1 - 602)<br><b>Cnn3</b> , GXL_18894, GeneID: 54321, Rattus norvegicus chr. 2<br>calponin 3, acidic                                           | <a href="#">EGRF-SP1F</a> | <a href="#">434 - 414</a>   | (-) |
| <b>GXP_22885</b> [ <a href="#">GXP_22885</a> ] (1 - 1045)<br><b>Pde5a</b> , GXL_18899, GeneID: 171115, Rattus norvegicus chr. 2<br>phosphodiesterase 5A, cGMP-specific                           | <a href="#">EGRF-SP1F</a> | <a href="#">348 - 328</a>   | (-) |
| <b>GXP_22886</b> [ <a href="#">GXP_22886</a> ] (1 - 601)<br><b>S100a6</b> , GXL_18900, GeneID: 85247, Rattus norvegicus chr. 2<br>S100 calcium binding protein A6 (calcyclin)                    | <a href="#">EGRF-SP1F</a> | <a href="#">410 - 387</a>   | (-) |
| <b>GXP_1412243</b> [ <a href="#">GXP_1412243</a> ] (1 - 658)<br><b>Accn5</b> , GXL_18906, GeneID: 63866, Rattus norvegicus chr. 2<br>amiloride-sensitive cation channel 5, intestinal            | <a href="#">EGRF-SP1F</a> | <a href="#">366 - 387</a>   | (+) |
| <b>GXP_22897</b> [ <a href="#">GXP_22897</a> ] (1 - 601)<br><b>Arhgap29</b> , GXL_18911, GeneID: 310833, Rattus norvegicus chr. 2<br>Rho GTPase activating protein 29                            | <a href="#">EGRF-SP1F</a> | <a href="#">418 - 395</a>   | (-) |
| <b>GXP_22899</b> [ <a href="#">GXP_22899</a> ] (1 - 1071)<br><b>Rsbm1_predicted</b> , GXL_18913, GeneID: 310749, Rattus norvegicus chr. 2<br>rosbin, round spermatid basic protein 1 (predicted) | <a href="#">EGRF-SP1F</a> | <a href="#">719 - 699</a>   | (-) |
| <b>GXP_22901</b> [ <a href="#">GXP_22901</a> ] (1 - 823)<br><b>Tspan2</b> , GXL_18915, GeneID: 64521, Rattus norvegicus chr. 2<br>tetraspanin 2                                                  | <a href="#">EGRF-SP1F</a> | <a href="#">1028 - 1007</a> | (-) |
| <b>GXP_1412514</b> [ <a href="#">GXP_1412514</a> ] (1 - 602)<br><b>Tspan2</b> , GXL_18915, GeneID: 64521, Rattus norvegicus chr. 2<br>tetraspanin 2                                              | <a href="#">EGRF-SP1F</a> | <a href="#">638 - 660</a>   | (+) |
| <b>GXP_1412515</b> [ <a href="#">GXP_1412515</a> ] (1 - 602)<br><b>Tspan2</b> , GXL_18915, GeneID: 64521, Rattus norvegicus chr. 2<br>tetraspanin 2                                              | <a href="#">EGRF-SP1F</a> | <a href="#">194 - 216</a>   | (+) |
| <b>GXP_22907</b> [ <a href="#">GXP_22907</a> ] (1 - 847)<br><b>Prss12</b> , GXL_18921, GeneID: 85266, Rattus norvegicus chr. 2<br>peptidase, serine, 12 (neurotrypsin, motopsin)                 | <a href="#">EGRF-SP1F</a> | <a href="#">194 - 172</a>   | (-) |
|                                                                                                                                                                                                  | <a href="#">EGRF-SP1F</a> | <a href="#">677 - 699</a>   | (+) |
|                                                                                                                                                                                                  | <a href="#">EGRF-SP1F</a> | <a href="#">821 - 844</a>   | (+) |
|                                                                                                                                                                                                  | <a href="#">EGRF-SP1F</a> | <a href="#">298 - 278</a>   | (-) |

|                                                                                                                                                                                                              |                           |                           |     |
|--------------------------------------------------------------------------------------------------------------------------------------------------------------------------------------------------------------|---------------------------|---------------------------|-----|
| <b>GXP_22926</b> [ <a href="#">GXP_22926</a> ] (1 - 601)<br><b>Tram111_predicted</b> , GXL_18940, GeneID: 310846, Rattus norvegicus chr. 2<br>translocation associated membrane protein 1-like 1 (predicted) |                           |                           |     |
| <b>GXP_1412530</b> [ <a href="#">GXP_1412530</a> ] (1 - 606)<br><b>Syt6</b> , GXL_18958, GeneID: 60565, Rattus norvegicus chr. 2<br>synaptotagmin VI                                                         | <a href="#">EGRF-SP1F</a> | <a href="#">275 - 251</a> | (-) |
| <b>GXP_1162606</b> [ <a href="#">GXP_1162606</a> ] (1 - 1251)<br><b>Pitx2</b> , GXL_18962, GeneID: 54284, Rattus norvegicus chr. 2<br>paired-like homeodomain transcription factor 2                         | <a href="#">EGRF-SP1F</a> | <a href="#">112 - 92</a>  | (-) |
| <b>GXP_22950</b> [ <a href="#">GXP_22950</a> ] (1 - 601)<br><b>Isg20l2</b> , GXL_18964, GeneID: 361977, Rattus norvegicus chr. 2<br>interferon stimulated exonuclease gene 20-like 2                         | <a href="#">EGRF-SP1F</a> | <a href="#">638 - 616</a> | (-) |
| <b>GXP_22965</b> [ <a href="#">GXP_22965</a> ] (1 - 974)<br><b>Unc5c</b> , GXL_18979, GeneID: 362049, Rattus norvegicus chr. 2<br>unc-5 homolog C (C. elegans)                                               | <a href="#">EGRF-SP1F</a> | <a href="#">519 - 543</a> | (+) |
| <b>GXP_1162377</b> [ <a href="#">GXP_1162377</a> ] (1 - 835)<br><b>Kcnd3</b> , GXL_19014, GeneID: 65195, Rattus norvegicus chr. 2<br>potassium voltage gated channel, Shal-related family, member 3          | <a href="#">EGRF-SP1F</a> | <a href="#">407 - 385</a> | (-) |
| <b>GXP_1412560</b> [ <a href="#">GXP_1412560</a> ] (1 - 601)<br><b>Kcnd3</b> , GXL_19014, GeneID: 65195, Rattus norvegicus chr. 2<br>potassium voltage gated channel, Shal-related family, member 3          | <a href="#">EGRF-SP1F</a> | <a href="#">27 - 49</a>   | (+) |
| <b>GXP_23001</b> [ <a href="#">GXP_23001</a> ] (1 - 893)<br><b>Sep15</b> , GXL_19015, GeneID: 113922, Rattus norvegicus chr. 2<br>selenoprotein                                                              | <a href="#">EGRF-SP1F</a> | <a href="#">465 - 488</a> | (+) |
| <b>GXP_23003</b> [ <a href="#">GXP_23003</a> ] (1 - 835)<br><b>Notch2</b> , GXL_19017, GeneID: 29492, Rattus norvegicus chr. 2<br>notch gene homolog 2 (Drosophila)                                          | <a href="#">EGRF-SP1F</a> | <a href="#">106 - 129</a> | (+) |
| <b>GXP_23004</b> [ <a href="#">GXP_23004</a> ] (1 - 601)<br><b>Map2k1ip1</b> , GXL_19018, GeneID: 362045, Rattus norvegicus chr. 2<br>mitogen-activated protein kinase kinase 1 interacting protein 1        | <a href="#">EGRF-SP1F</a> | <a href="#">290 - 313</a> | (+) |
| <b>GXP_1412777</b> [ <a href="#">GXP_1412777</a> ] (1 - 602)<br><b>Map2k1ip1</b> , GXL_19018, GeneID: 362045, Rattus norvegicus chr. 2<br>mitogen-activated protein kinase kinase 1 interacting protein 1    | <a href="#">EGRF-SP1F</a> | <a href="#">280 - 258</a> | (-) |
| <b>GXP_25354</b> [ <a href="#">GXP_25354</a> ] (1 - 690)<br><b>Ptpn1</b> , GXL_21003, GeneID: 24697, Rattus norvegicus chr. 3<br>protein tyrosine phosphatase, non-receptor type 1                           | <a href="#">EGRF-SP1F</a> | <a href="#">390 - 368</a> | (-) |
| <b>GXP_25360</b> [ <a href="#">GXP_25360</a> ] (1 - 601)<br><b>Plcg1</b> , GXL_21008, GeneID: 25738, Rattus norvegicus chr. 3<br>phospholipase C, gamma 1                                                    | <a href="#">EGRF-SP1F</a> | <a href="#">96 - 74</a>   | (-) |
|                                                                                                                                                                                                              | <a href="#">EGRF-SP1F</a> | <a href="#">260 - 284</a> | (+) |
|                                                                                                                                                                                                              | <a href="#">EGRF-SP1F</a> | <a href="#">412 - 434</a> | (+) |
|                                                                                                                                                                                                              | <a href="#">EGRF-SP1F</a> | <a href="#">416 - 439</a> | (+) |
|                                                                                                                                                                                                              | <a href="#">EGRF-SP1F</a> | <a href="#">540 - 561</a> | (+) |
|                                                                                                                                                                                                              | <a href="#">EGRF-SP1F</a> | <a href="#">609 - 632</a> | (+) |

|                                                                                                                                                                                                                            |                           |                           |     |
|----------------------------------------------------------------------------------------------------------------------------------------------------------------------------------------------------------------------------|---------------------------|---------------------------|-----|
| <b>GXP_25362</b> [ <a href="#">GXP_25362</a> ] (1 - 1338)<br><b>Slc32a1</b> , GXL_21010, GeneID: 83612, Rattus norvegicus chr. 3<br>solute carrier family 32 (GABA vesicular transporter), member 1                        |                           |                           |     |
| <b>GXP_25370</b> [ <a href="#">GXP_25370</a> ] (1 - 709)<br><b>Gdap11l1 predicted</b> , GXL_21018, GeneID: 311616, Rattus norvegicus chr. 3<br>ganglioside-induced differentiation-associated protein 1-like 1 (predicted) | <a href="#">EGRF-SP1F</a> | <a href="#">521 - 499</a> | (-) |
| <b>GXP_25374</b> [ <a href="#">GXP_25374</a> ] (1 - 772)<br><b>Pofut1</b> , GXL_21022, GeneID: 311551, Rattus norvegicus chr. 3<br>protein O-fucosyltransferase 1                                                          | <a href="#">EGRF-SP1F</a> | <a href="#">312 - 332</a> | (+) |
|                                                                                                                                                                                                                            | <a href="#">EGRF-SP1F</a> | <a href="#">314 - 337</a> | (+) |
|                                                                                                                                                                                                                            | <a href="#">EGRF-SP1F</a> | <a href="#">619 - 640</a> | (+) |
|                                                                                                                                                                                                                            | <a href="#">EGRF-SP1F</a> | <a href="#">133 - 111</a> | (-) |
| <b>GXP_25383</b> [ <a href="#">GXP_25383</a> ] (1 - 889)<br><b>Tcfap2c</b> , GXL_21031, GeneID: 362280, Rattus norvegicus chr. 3<br>transcription factor AP-2, gamma                                                       | <a href="#">EGRF-SP1F</a> | <a href="#">748 - 728</a> | (-) |
| <b>GXP_1414342</b> [ <a href="#">GXP_1414342</a> ] (1 - 602)<br><b>Tcfap2c</b> , GXL_21031, GeneID: 362280, Rattus norvegicus chr. 3<br>transcription factor AP-2, gamma                                                   | <a href="#">EGRF-SP1F</a> | <a href="#">168 - 146</a> | (-) |
| <b>GXP_1414141</b> [ <a href="#">GXP_1414141</a> ] (1 - 611)<br><b>A</b> , GXL_21039, GeneID: 24152, Rattus norvegicus chr. 3<br>agouti                                                                                    | <a href="#">EGRF-SP1F</a> | <a href="#">455 - 477</a> | (+) |
| <b>GXP_25392</b> [ <a href="#">GXP_25392</a> ] (1 - 698)<br><b>Epb4.1l1</b> , GXL_21040, GeneID: 59317, Rattus norvegicus chr. 3<br>erythrocyte protein band 4.1-like 1                                                    | <a href="#">EGRF-SP1F</a> | <a href="#">274 - 296</a> | (+) |
|                                                                                                                                                                                                                            | <a href="#">EGRF-SP1F</a> | <a href="#">614 - 637</a> | (+) |
| <b>GXP_1414183</b> [ <a href="#">GXP_1414183</a> ] (1 - 796)<br><b>Epb4.1l1</b> , GXL_21040, GeneID: 59317, Rattus norvegicus chr. 3<br>erythrocyte protein band 4.1-like 1                                                | <a href="#">EGRF-SP1F</a> | <a href="#">634 - 613</a> | (-) |
| <b>GXP_25402</b> [ <a href="#">GXP_25402</a> ] (1 - 766)<br><b>Hnf4a</b> , GXL_21050, GeneID: 25735, Rattus norvegicus chr. 3<br>hepatocyte nuclear factor 4, alpha                                                        | <a href="#">EGRF-SP1F</a> | <a href="#">414 - 437</a> | (+) |
| <b>GXP_25418</b> [ <a href="#">GXP_25418</a> ] (1 - 883)<br><b>Ss18l1</b> , GXL_21066, GeneID: 192352, Rattus norvegicus chr. 3<br>synovial sarcoma translocation gene on chromosome 18-like 1                             | <a href="#">EGRF-SP1F</a> | <a href="#">404 - 425</a> | (+) |
|                                                                                                                                                                                                                            | <a href="#">EGRF-SP1F</a> | <a href="#">682 - 706</a> | (+) |
| <b>GXP_25421</b> [ <a href="#">GXP_25421</a> ] (1 - 639)<br><b>Rps21</b> , GXL_21069, GeneID: 81775, Rattus norvegicus chr. 3<br>ribosomal protein S21                                                                     | <a href="#">EGRF-SP1F</a> | <a href="#">310 - 290</a> | (-) |
| <b>GXP_1414360</b> [ <a href="#">GXP_1414360</a> ] (1 - 603)<br><b>Rps21</b> , GXL_21069, GeneID: 81775, Rattus norvegicus chr. 3<br>ribosomal protein S21                                                                 | <a href="#">EGRF-SP1F</a> | <a href="#">75 - 55</a>   | (-) |
| <b>GXP_25426</b> [ <a href="#">GXP_25426</a> ] (1 - 642)<br><b>Trp53rk predicted</b> , GXL_21074, GeneID: 362272, Rattus norvegicus chr. 3<br>TP53 regulating kinase (predicted)                                           | <a href="#">EGRF-SP1F</a> | <a href="#">469 - 447</a> | (-) |
|                                                                                                                                                                                                                            | <a href="#">EGRF-SP1F</a> | <a href="#">472 - 452</a> | (-) |
|                                                                                                                                                                                                                            | <a href="#">EGRF-SP1F</a> | <a href="#">692 - 672</a> | (-) |

|                                                                                                                                                                                                                          |                           |                           |     |
|--------------------------------------------------------------------------------------------------------------------------------------------------------------------------------------------------------------------------|---------------------------|---------------------------|-----|
| <b>GXP_25430</b> [ <a href="#">GXP_25430</a> ] (1 - 733)<br><b>Zgpat</b> , GXL_21078, GeneID: 296478, Rattus norvegicus chr. 3<br>zinc finger, CCCH-type with G patch domain                                             |                           |                           |     |
| <b>GXP_1164963</b> [ <a href="#">GXP_1164963</a> ] (1 - 604)<br><b>Zgpat</b> , GXL_21078, GeneID: 296478, Rattus norvegicus chr. 3<br>zinc finger, CCCH-type with G patch domain                                         | <a href="#">EGRF-SP1F</a> | <a href="#">405 - 425</a> | (+) |
| <b>GXP_1414207</b> [ <a href="#">GXP_1414207</a> ] (1 - 636)<br><b>Src</b> , GXL_21079, GeneID: 83805, Rattus norvegicus chr. 3<br>Rous sarcoma oncogene                                                                 | <a href="#">EGRF-SP1F</a> | <a href="#">326 - 305</a> | (-) |
| <b>GXP_25434</b> [ <a href="#">GXP_25434</a> ] (1 - 802)<br><b>Bpi</b> , GXL_21082, GeneID: 296321, Rattus norvegicus chr. 3<br>bactericidal/permeability-increasing protein                                             | <a href="#">EGRF-SP1F</a> | <a href="#">568 - 588</a> | (+) |
| <b>GXP_1414219</b> [ <a href="#">GXP_1414219</a> ] (1 - 601)<br><b>Bpi</b> , GXL_21082, GeneID: 296321, Rattus norvegicus chr. 3<br>bactericidal/permeability-increasing protein                                         | <a href="#">EGRF-SP1F</a> | <a href="#">336 - 313</a> | (-) |
| <b>GXP_25447</b> [ <a href="#">GXP_25447</a> ] (1 - 801)<br><b>Xkr7</b> , GXL_21095, GeneID: 311549, Rattus norvegicus chr. 3<br>X Kell blood group precursor related family member 7 homolog (human)                    | <a href="#">EGRF-SP1F</a> | <a href="#">473 - 495</a> | (+) |
|                                                                                                                                                                                                                          | <a href="#">EGRF-SP1F</a> | <a href="#">790 - 767</a> | (-) |
|                                                                                                                                                                                                                          | <a href="#">EGRF-SP1F</a> | <a href="#">792 - 772</a> | (-) |
|                                                                                                                                                                                                                          | <a href="#">EGRF-SP1F</a> | <a href="#">731 - 754</a> | (+) |
| <b>GXP_25462</b> [ <a href="#">GXP_25462</a> ] (1 - 929)<br><b>Bwk1</b> , GXL_21110, GeneID: 296466, Rattus norvegicus chr. 3<br>Bwk1 leukemia-related gene                                                              | <a href="#">EGRF-SP1F</a> | <a href="#">803 - 826</a> | (+) |
| <b>GXP_1164639</b> [ <a href="#">GXP_1164639</a> ] (1 - 601)<br><b>Dlgap4</b> , GXL_21115, GeneID: 286930, Rattus norvegicus chr. 3<br>discs, large homolog-associated protein 4 (Drosophila)                            | <a href="#">EGRF-SP1F</a> | <a href="#">326 - 347</a> | (+) |
| <b>GXP_1164641</b> [ <a href="#">GXP_1164641</a> ] (1 - 601)<br><b>Dlgap4</b> , GXL_21115, GeneID: 286930, Rattus norvegicus chr. 3<br>discs, large homolog-associated protein 4 (Drosophila)                            | <a href="#">EGRF-SP1F</a> | <a href="#">443 - 466</a> | (+) |
| <b>GXP_25490</b> [ <a href="#">GXP_25490</a> ] (1 - 769)<br><b>Arfgef2</b> , GXL_21138, GeneID: 296380, Rattus norvegicus chr. 3<br>ADP-ribosylation factor guanine nucleotide-exchange factor 2 (brefeldin A-inhibited) | <a href="#">EGRF-SP1F</a> | <a href="#">363 - 387</a> | (+) |
| <b>GXP_25506</b> [ <a href="#">GXP_25506</a> ] (1 - 601)<br><b>Top1</b> , GXL_21154, GeneID: 64550, Rattus norvegicus chr. 3<br>topoisomerase (DNA) I                                                                    | <a href="#">EGRF-SP1F</a> | <a href="#">290 - 312</a> | (+) |
| <b>GXP_25509</b> [ <a href="#">GXP_25509</a> ] (1 - 605)<br><b>Dnmt3b</b> , GXL_21157, GeneID: 444985, Rattus norvegicus chr. 3<br>DNA methyltransferase 3B                                                              | <a href="#">EGRF-SP1F</a> | <a href="#">423 - 400</a> | (-) |
| <b>GXP_25517</b> [ <a href="#">GXP_25517</a> ] (1 - 790)<br><b>Vapb</b> , GXL_21165, GeneID: 60431, Rattus norvegicus chr. 3<br>vesicle-associated membrane protein, associated protein B and C                          | <a href="#">EGRF-SP1F</a> | <a href="#">607 - 629</a> | (+) |
|                                                                                                                                                                                                                          | <a href="#">EGRF-SP1F</a> | <a href="#">617 - 641</a> | (+) |
|                                                                                                                                                                                                                          | <a href="#">EGRF-SP1F</a> | <a href="#">155 - 178</a> | (+) |

|                                                                                                                                                                                                         |                           |                           |     |
|---------------------------------------------------------------------------------------------------------------------------------------------------------------------------------------------------------|---------------------------|---------------------------|-----|
| <b>GXP_27556</b> [ <a href="#">GXP_27556</a> ] (1 - 748)<br><b>Psap</b> , GXL_23131, GeneID: 25524, Rattus norvegicus chr. 20<br>prosaposin                                                             | <a href="#">EGRF-SP1F</a> | <a href="#">480 - 500</a> | (+) |
| <b>GXP_27566</b> [ <a href="#">GXP_27566</a> ] (1 - 768)<br><b>Cd164</b> , GXL_23141, GeneID: 83689, Rattus norvegicus chr. 20<br>CD164 antigen                                                         | <a href="#">EGRF-SP1F</a> | <a href="#">465 - 488</a> | (+) |
| <b>GXP_27578</b> [ <a href="#">GXP_27578</a> ] (1 - 785)<br><b>Prep</b> , GXL_23153, GeneID: 83471, Rattus norvegicus chr. 20<br>prolyl endopeptidase                                                   | <a href="#">EGRF-SP1F</a> | <a href="#">187 - 166</a> | (-) |
| <b>GXP_27620</b> [ <a href="#">GXP_27620</a> ] (1 - 920)<br><b>Fabp7</b> , GXL_23195, GeneID: 80841, Rattus norvegicus chr. 20<br>fatty acid binding protein 7, brain                                   | <a href="#">EGRF-SP1F</a> | <a href="#">618 - 638</a> | (+) |
| <b>GXP_27621</b> [ <a href="#">GXP_27621</a> ] (1 - 615)<br><b>Cd24</b> , GXL_23196, GeneID: 25145, Rattus norvegicus chr. 20<br>CD24 antigen                                                           | <a href="#">EGRF-SP1F</a> | <a href="#">197 - 176</a> | (-) |
| <b>GXP_27627</b> [ <a href="#">GXP_27627</a> ] (1 - 691)<br><b>Gja1</b> , GXL_23202, GeneID: 24392, Rattus norvegicus chr. 20<br>gap junction membrane channel protein alpha 1                          | <a href="#">EGRF-SP1F</a> | <a href="#">178 - 198</a> | (+) |
| <b>GXP_27631</b> [ <a href="#">GXP_27631</a> ] (1 - 601)<br><b>Neurog3</b> , GXL_23206, GeneID: 60329, Rattus norvegicus chr. 20<br>neurogenin 3                                                        | <a href="#">EGRF-SP1F</a> | <a href="#">403 - 380</a> | (-) |
| <b>GXP_45150</b> [ <a href="#">GXP_45150</a> ] (1 - 802)<br><b>Fnbp1</b> , GXL_37299, GeneID: 192348, Rattus norvegicus chr. 3<br>formin binding protein 1                                              | <a href="#">EGRF-SP1F</a> | <a href="#">491 - 469</a> | (-) |
| <b>GXP_1413530</b> [ <a href="#">GXP_1413530</a> ] (1 - 601)<br><b>Gylt1b</b> , GXL_37302, GeneID: 311202, Rattus norvegicus chr. 3<br>glycosyltransferase-like 1B                                      | <a href="#">EGRF-SP1F</a> | <a href="#">450 - 472</a> | (+) |
| <b>GXP_45169</b> [ <a href="#">GXP_45169</a> ] (1 - 676)<br><b>Ndufs3 predicted</b> , GXL_37318, GeneID: 295923, Rattus norvegicus chr. 3<br>NADH dehydrogenase (ubiquinone) Fe-S protein 3 (predicted) | <a href="#">EGRF-SP1F</a> | <a href="#">472 - 494</a> | (+) |
| <b>GXP_45172</b> [ <a href="#">GXP_45172</a> ] (1 - 663)<br><b>Ptges</b> , GXL_37320, GeneID: 59103, Rattus norvegicus chr. 3<br>prostaglandin E synthase                                               | <a href="#">EGRF-SP1F</a> | <a href="#">771 - 751</a> | (-) |
| <b>GXP_45174</b> [ <a href="#">GXP_45174</a> ] (1 - 601)<br><b>Nfe2l2</b> , GXL_37322, GeneID: 83619, Rattus norvegicus chr. 3<br>nuclear factor, erythroid derived 2, like 2                           | <a href="#">EGRF-SP1F</a> | <a href="#">163 - 183</a> | (+) |
| <b>GXP_1413439</b> [ <a href="#">GXP_1413439</a> ] (1 - 626)<br><b>Tmx2</b> , GXL_37330, GeneID: 295701, Rattus norvegicus chr. 3<br>thioredoxin-related transmembrane protein 2                        | <a href="#">EGRF-SP1F</a> | <a href="#">210 - 234</a> | (+) |
|                                                                                                                                                                                                         | <a href="#">EGRF-SP1F</a> | <a href="#">472 - 449</a> | (-) |
|                                                                                                                                                                                                         | <a href="#">EGRF-SP1F</a> | <a href="#">433 - 410</a> | (-) |
|                                                                                                                                                                                                         | <a href="#">EGRF-SP1F</a> | <a href="#">38 - 18</a>   | (-) |
|                                                                                                                                                                                                         | <a href="#">EGRF-SP1F</a> | <a href="#">425 - 402</a> | (-) |

|                                                                                                                                                                                                                                 |                           |                           |     |
|---------------------------------------------------------------------------------------------------------------------------------------------------------------------------------------------------------------------------------|---------------------------|---------------------------|-----|
| <b>GXP_45200</b> [ <a href="#">GXP_45200</a> ] (1 - 601)<br><b>Atp5g3</b> , GXL_37348, GeneID: 114630, Rattus norvegicus chr. 3<br>ATP synthase, H+ transporting, mitochondrial F0 complex, subunit c (subunit 9) isoform 3     | <a href="#">EGRF-SP1F</a> | <a href="#">644 - 621</a> | (-) |
| <b>GXP_1413375</b> [ <a href="#">GXP_1413375</a> ] (1 - 955)<br><b>Atp5g3</b> , GXL_37348, GeneID: 114630, Rattus norvegicus chr. 3<br>ATP synthase, H+ transporting, mitochondrial F0 complex, subunit c (subunit 9) isoform 3 | <a href="#">EGRF-SP1F</a> | <a href="#">307 - 330</a> | (+) |
| <b>GXP_45219</b> [ <a href="#">GXP_45219</a> ] (1 - 601)<br><b>Tmem15 predicted</b> , GXL_37367, GeneID: 311847, Rattus norvegicus chr. 3<br>transmembrane protein 15 (predicted)                                               | <a href="#">EGRF-SP1F</a> | <a href="#">534 - 557</a> | (+) |
| <b>GXP_45246</b> [ <a href="#">GXP_45246</a> ] (1 - 897)<br><b>Kcnh7</b> , GXL_37394, GeneID: 170739, Rattus norvegicus chr. 3<br>potassium voltage-gated channel, subfamily H (eag-related), member 7                          | <a href="#">EGRF-SP1F</a> | <a href="#">541 - 562</a> | (+) |
| <b>GXP_45266</b> [ <a href="#">GXP_45266</a> ] (1 - 655)<br><b>Lcn2</b> , GXL_37414, GeneID: 170496, Rattus norvegicus chr. 3<br>lipocalin 2                                                                                    | <a href="#">EGRF-SP1F</a> | <a href="#">142 - 120</a> | (-) |
|                                                                                                                                                                                                                                 | <a href="#">EGRF-SP1F</a> | <a href="#">216 - 193</a> | (-) |
|                                                                                                                                                                                                                                 | <a href="#">EGRF-SP1F</a> | <a href="#">222 - 198</a> | (-) |
|                                                                                                                                                                                                                                 | <a href="#">EGRF-SP1F</a> | <a href="#">307 - 327</a> | (+) |
|                                                                                                                                                                                                                                 | <a href="#">EGRF-SP1F</a> | <a href="#">448 - 469</a> | (+) |
| <b>GXP_1163336</b> [ <a href="#">GXP_1163336</a> ] (1 - 710)<br><b>Cacnb4</b> , GXL_37423, GeneID: 58942, Rattus norvegicus chr. 3<br>calcium channel, voltage-dependent, beta 4 subunit                                        | <a href="#">EGRF-SP1F</a> | <a href="#">523 - 543</a> | (+) |
| <b>GXP_1413218</b> [ <a href="#">GXP_1413218</a> ] (1 - 663)<br><b>Cacnb4</b> , GXL_37423, GeneID: 58942, Rattus norvegicus chr. 3<br>calcium channel, voltage-dependent, beta 4 subunit                                        | <a href="#">EGRF-SP1F</a> | <a href="#">188 - 209</a> | (+) |
| <b>GXP_45279</b> [ <a href="#">GXP_45279</a> ] (1 - 849)<br><b>Fibcd1 predicted</b> , GXL_37427, GeneID: 311861, Rattus norvegicus chr. 3<br>fibrinogen C domain containing 1 (predicted)                                       | <a href="#">EGRF-SP1F</a> | <a href="#">263 - 283</a> | (+) |
| <b>GXP_45284</b> [ <a href="#">GXP_45284</a> ] (1 - 894)<br><b>Ubadc1</b> , GXL_37432, GeneID: 362087, Rattus norvegicus chr. 3<br>ubiquitin associated domain containing 1                                                     | <a href="#">EGRF-SP1F</a> | <a href="#">706 - 729</a> | (+) |
| <b>GXP_45311</b> [ <a href="#">GXP_45311</a> ] (1 - 1418)<br><b>Cdk9</b> , GXL_37459, GeneID: 362110, Rattus norvegicus chr. 3<br>cyclin-dependent kinase 9 (CDC2-related kinase)                                               | <a href="#">EGRF-SP1F</a> | <a href="#">620 - 597</a> | (-) |
| <b>GXP_45327</b> [ <a href="#">GXP_45327</a> ] (1 - 784)<br><b>Psmc5 predicted</b> , GXL_37475, GeneID: 296651, Rattus norvegicus chr. 3<br>proteasome (prosome, macropain) 26S subunit, non-ATPase, 5 (predicted)              | <a href="#">EGRF-SP1F</a> | <a href="#">219 - 199</a> | (-) |
| <b>GXP_1413607</b> [ <a href="#">GXP_1413607</a> ] (1 - 601)<br><b>Hipk3</b> , GXL_37476, GeneID: 83617, Rattus norvegicus chr. 3<br>homeodomain interacting protein kinase 3                                                   | <a href="#">EGRF-SP1F</a> | <a href="#">897 - 873</a> | (-) |
| <b>GXP_45331</b> [ <a href="#">GXP_45331</a> ] (1 - 850)<br><b>Arl5a</b> , GXL_37479, GeneID: 117050, Rattus norvegicus chr. 3<br>ADP-ribosylation factor-like 5A                                                               | <a href="#">EGRF-SP1F</a> | <a href="#">112 - 136</a> | (+) |
|                                                                                                                                                                                                                                 | <a href="#">EGRF-SP1F</a> | <a href="#">118 - 138</a> | (+) |
|                                                                                                                                                                                                                                 | <a href="#">EGRF-SP1F</a> | <a href="#">386 - 406</a> | (+) |
|                                                                                                                                                                                                                                 | <a href="#">EGRF-SP1F</a> | <a href="#">563 - 583</a> | (+) |
|                                                                                                                                                                                                                                 | <a href="#">EGRF-SP1F</a> | <a href="#">571 - 591</a> | (+) |

|                                                                                                                                      |                           |                           |     |
|--------------------------------------------------------------------------------------------------------------------------------------|---------------------------|---------------------------|-----|
| <b>GXP_45333</b> [ <a href="#">GXP_45333</a> ] (1 - 918)                                                                             | <a href="#">EGRF-SP1F</a> | <a href="#">579 - 603</a> | (+) |
| <b>Grin1</b> , GXL_37481, GeneID: 24408, Rattus norvegicus chr. 3<br>glutamate receptor, ionotropic, N-methyl D-aspartate 1          | <a href="#">EGRF-SP1F</a> | <a href="#">541 - 518</a> | (-) |
| <b>GXP_1412915</b> [ <a href="#">GXP_1412915</a> ] (1 - 602)                                                                         | <a href="#">EGRF-SP1F</a> | <a href="#">142 - 163</a> | (+) |
| <b>Grin1</b> , GXL_37481, GeneID: 24408, Rattus norvegicus chr. 3<br>glutamate receptor, ionotropic, N-methyl D-aspartate 1          | <a href="#">EGRF-SP1F</a> | <a href="#">391 - 368</a> | (-) |
| <b>GXP_1412916</b> [ <a href="#">GXP_1412916</a> ] (1 - 601)                                                                         | <a href="#">EGRF-SP1F</a> | <a href="#">339 - 316</a> | (-) |
| <b>Grin1</b> , GXL_37481, GeneID: 24408, Rattus norvegicus chr. 3<br>glutamate receptor, ionotropic, N-methyl D-aspartate 1          | <a href="#">EGRF-SP1F</a> | <a href="#">345 - 321</a> | (-) |
| <b>GXP_1163272</b> [ <a href="#">GXP_1163272</a> ] (1 - 601)                                                                         | <a href="#">EGRF-SP1F</a> | <a href="#">512 - 488</a> | (-) |
| <b>Rpl35</b> , GXL_37484, GeneID: 296709, Rattus norvegicus chr. 3<br>ribosomal protein L35                                          | <a href="#">EGRF-SP1F</a> | <a href="#">624 - 604</a> | (-) |
| <b>GXP_45351</b> [ <a href="#">GXP_45351</a> ] (1 - 828)                                                                             | <a href="#">EGRF-SP1F</a> | <a href="#">720 - 743</a> | (+) |
| <b>Cacna1b</b> , GXL_37498, GeneID: 257648, Rattus norvegicus chr. 3<br>calcium channel, voltage-dependent, N type, alpha 1B subunit | <a href="#">EGRF-SP1F</a> | <a href="#">26 - 46</a>   | (+) |
| <b>GXP_45396</b> [ <a href="#">GXP_45396</a> ] (1 - 1018)                                                                            | <a href="#">EGRF-SP1F</a> | <a href="#">28 - 51</a>   | (+) |
| <b>Stk39</b> , GXL_37542, GeneID: 54348, Rattus norvegicus chr. 3<br>serine/threonine kinase 39, STE20/SPS1 homolog (yeast)          | <a href="#">EGRF-SP1F</a> | <a href="#">155 - 179</a> | (+) |
| <b>GXP_1413101</b> [ <a href="#">GXP_1413101</a> ] (1 - 602)                                                                         | <a href="#">EGRF-SP1F</a> | <a href="#">179 - 200</a> | (+) |
| <b>Stxbp1</b> , GXL_37543, GeneID: 25558, Rattus norvegicus chr. 3<br>syntaxin binding protein 1                                     | <a href="#">EGRF-SP1F</a> | <a href="#">183 - 206</a> | (+) |
| <b>GXP_45417</b> [ <a href="#">GXP_45417</a> ] (1 - 715)                                                                             | <a href="#">EGRF-SP1F</a> | <a href="#">155 - 133</a> | (-) |
| <b>Calcr1</b> , GXL_37563, GeneID: 25029, Rattus norvegicus chr. 3<br>calcitonin receptor-like                                       | <a href="#">EGRF-SP1F</a> | <a href="#">105 - 85</a>  | (-) |
| <b>GXP_45424</b> [ <a href="#">GXP_45424</a> ] (1 - 656)                                                                             | <a href="#">EGRF-SP1F</a> | <a href="#">354 - 374</a> | (+) |
| <b>Serp1ng1</b> , GXL_37570, GeneID: 295703, Rattus norvegicus chr. 3<br>serine (or cysteine) peptidase inhibitor, clade G, member 1 | <a href="#">EGRF-SP1F</a> | <a href="#">307 - 287</a> | (-) |
| <b>GXP_45441</b> [ <a href="#">GXP_45441</a> ] (1 - 770)                                                                             | <a href="#">EGRF-SP1F</a> | <a href="#">476 - 499</a> | (+) |
| <b>Pde11a</b> , GXL_37587, GeneID: 140928, Rattus norvegicus chr. 3<br>phosphodiesterase 11A                                         | <a href="#">EGRF-SP1F</a> | <a href="#">484 - 505</a> | (+) |
| <b>GXP_1413385</b> [ <a href="#">GXP_1413385</a> ] (1 - 602)                                                                         |                           |                           |     |
| <b>Pde11a</b> , GXL_37587, GeneID: 140928, Rattus norvegicus chr. 3<br>phosphodiesterase 11A                                         |                           |                           |     |
| <b>GXP_45447</b> [ <a href="#">GXP_45447</a> ] (1 - 710)                                                                             |                           |                           |     |
| <b>Atf2</b> , GXL_37593, GeneID: 81647, Rattus norvegicus chr. 3<br>activating transcription factor 2                                |                           |                           |     |
| <b>GXP_45479</b> [ <a href="#">GXP_45479</a> ] (1 - 620)                                                                             |                           |                           |     |
| <b>Rtn4rl2</b> , GXL_37625, GeneID: 311169, Rattus norvegicus chr. 3<br>reticulon 4 receptor-like 2                                  |                           |                           |     |

**GXP\_45489** [[GXP\\_45489](#)] (1 - 841)**Chn1**, GXL\_37635, GeneID: 84030, Rattus norvegicus chr. 3  
chimerin (chimaerin) 1[EGRF-SP1F](#) [544 - 523](#) (-)**GXP\_45503** [[GXP\\_45503](#)] (1 - 601)**Cd44**, GXL\_37649, GeneID: 25406, Rattus norvegicus chr. 3  
CD44 antigen[EGRF-SP1F](#) [298 - 278](#) (-)**GXP\_1412908** [[GXP\\_1412908](#)] (1 - 602)**Slc34a3**, GXL\_37660, GeneID: 246234, Rattus norvegicus chr. 3  
solute carrier family 34 (sodium phosphate), member 3[EGRF-SP1F](#) [354 - 334](#) (-)[EGRF-SP1F](#) [144 - 168](#) (+)[EGRF-SP1F](#) [256 - 276](#) (+)[EGRF-SP1F](#) [337 - 357](#) (+)[EGRF-SP1F](#) [339 - 362](#) (+)[EGRF-SP1F](#) [372 - 393](#) (+)[EGRF-SP1F](#) [436 - 458](#) (+)[EGRF-SP1F](#) [441 - 463](#) (+)[EGRF-SP1F](#) [454 - 477](#) (+)[EGRF-SP1F](#) [66 - 86](#) (+)[EGRF-SP1F](#) [147 - 167](#) (+)[EGRF-SP1F](#) [149 - 172](#) (+)[EGRF-SP1F](#) [182 - 203](#) (+)[EGRF-SP1F](#) [246 - 268](#) (+)[EGRF-SP1F](#) [251 - 273](#) (+)[EGRF-SP1F](#) [264 - 287](#) (+)**GXP\_1413236** [[GXP\\_1413236](#)] (1 - 601)**Acvr1**, GXL\_37664, GeneID: 79558, Rattus norvegicus chr. 3  
activin A receptor, type 1[EGRF-SP1F](#) [198 - 218](#) (+)**GXP\_45522** [[GXP\\_45522](#)] (1 - 601)**Rbms1**, GXL\_37668, GeneID: 362138, Rattus norvegicus chr. 3  
RNA binding motif, single stranded interacting protein 1**GXP\_1412907** [[GXP\\_1412907](#)] (1 - 602)**Tubb2c**, GXL\_37681, GeneID: 296554, Rattus norvegicus chr. 3  
tubulin, beta 2c[EGRF-SP1F](#) [352 - 332](#) (-)**GXP\_45537** [[GXP\\_45537](#)] (1 - 601)**Olr678 predicted**, GXL\_37683, GeneID: 295884, Rattus norvegicus chr. 3  
olfactory receptor 678 (predicted)[EGRF-SP1F](#) [86 - 109](#) (+)**GXP\_45562** [[GXP\\_45562](#)] (1 - 702)**Dgkz**, GXL\_37708, GeneID: 81821, Rattus norvegicus chr. 3  
diacylglycerol kinase zeta[EGRF-SP1F](#) [307 - 287](#) (-)**GXP\_1162920** [[GXP\\_1162920](#)] (1 - 601)**Phpt1 predicted**, GXL\_37713, GeneID: 296571, Rattus norvegicus chr. 3[EGRF-SP1F](#) [396 - 373](#) (-)



phosphohistidine phosphatase 1 (predicted)

**GXP\_45583** [[GXP\\_45583](#)] (1 - 813)

**Sh3glb2**, GXL\_37729, GeneID: 311848, Rattus norvegicus chr. 3  
SH3-domain GRB2-like endophilin B2

[EGRF-SP1F](#) [661 - 638](#) (-)

**GXP\_45608** [[GXP\\_45608](#)] (1 - 956)

**Dlx2**, GXL\_37754, GeneID: 296499, Rattus norvegicus chr. 3  
distal-less homeobox 2

[EGRF-SP1F](#) [730 - 753](#) (+)

**GXP\_52111** [[GXP\\_52111](#)] (1 - 601)

**Olr917\_predicted**, GXL\_42851, GeneID: 288795, Rattus norvegicus chr. 7  
olfactory receptor 917 (predicted)

[EGRF-SP1F](#) [46 - 26](#) (-)

**GXP\_52136** [[GXP\\_52136](#)] (1 - 627)

**Akap8**, GXL\_42875, GeneID: 116633, Rattus norvegicus chr. 7  
A kinase (PRKA) anchor protein 8

[EGRF-SP1F](#) [152 - 131](#) (-)

**GXP\_52137** [[GXP\\_52137](#)] (1 - 603)

**Aes**, GXL\_42876, GeneID: 29466, Rattus norvegicus chr. 7  
amino-terminal enhancer of split

[EGRF-SP1F](#) [472 - 452](#) (-)

**GXP\_1417784** [[GXP\\_1417784](#)] (1 - 1021)

**Aes**, GXL\_42876, GeneID: 29466, Rattus norvegicus chr. 7  
amino-terminal enhancer of split

[EGRF-SP1F](#) [70 - 49](#) (-)

[EGRF-SP1F](#) [1021 - 997](#) (-)

**GXP\_52151** [[GXP\\_52151](#)] (1 - 917)

**Tmem19**, GXL\_42890, GeneID: 299800, Rattus norvegicus chr. 7  
transmembrane protein 19

[EGRF-SP1F](#) [511 - 489](#) (-)

**GXP\_52154** [[GXP\\_52154](#)] (1 - 682)

**Hrsp12**, GXL\_42893, GeneID: 65151, Rattus norvegicus chr. 7  
heat-responsive protein 12

[EGRF-SP1F](#) [23 - 43](#) (+)

**GXP\_52157** [[GXP\\_52157](#)] (1 - 896)

**Map2k2**, GXL\_42896, GeneID: 58960, Rattus norvegicus chr. 7  
mitogen activated protein kinase kinase 2

[EGRF-SP1F](#) [535 - 514](#) (-)

**GXP\_52161** [[GXP\\_52161](#)] (1 - 919)

**Zbtb7a**, GXL\_42900, GeneID: 117107, Rattus norvegicus chr. 7  
zinc finger and BTB domain containing 7a

[EGRF-SP1F](#) [237 - 257](#) (+)

[EGRF-SP1F](#) [544 - 566](#) (+)

[EGRF-SP1F](#) [808 - 830](#) (+)

**GXP\_52165** [[GXP\\_52165](#)] (1 - 695)

**Vps28\_predicted**, GXL\_42903, GeneID: 300052, Rattus norvegicus chr. 7  
vacuolar protein sorting 28 (yeast) (predicted)

[EGRF-SP1F](#) [435 - 415](#) (-)

**GXP\_52172** [[GXP\\_52172](#)] (1 - 602)

**Matk**, GXL\_42910, GeneID: 60450, Rattus norvegicus chr. 7  
megakaryocyte-associated tyrosine kinase

[EGRF-SP1F](#) [468 - 488](#) (+)

**GXP\_1417808** [[GXP\\_1417808](#)] (1 - 601)

**Matk**, GXL\_42910, GeneID: 60450, Rattus norvegicus chr. 7  
megakaryocyte-associated tyrosine kinase

[EGRF-SP1F](#) [159 - 179](#) (+)

|                                                                                                                                                                                      |                  |                  |     |
|--------------------------------------------------------------------------------------------------------------------------------------------------------------------------------------|------------------|------------------|-----|
| <b>GXP_52173</b> [ <a href="#">GXP_52173</a> ] (1 - 633)<br><b>Lynx1 predicted</b> , GXL_42911, GeneID: 300018, Rattus norvegicus chr. 7<br>Ly6/neurotoxin 1 (predicted)             | <u>EGRF-SP1F</u> | <u>488 - 466</u> | (-) |
| <b>GXP_52177</b> [ <a href="#">GXP_52177</a> ] (1 - 601)<br><b>Ptbp1</b> , GXL_42914, GeneID: 29497, Rattus norvegicus chr. 7<br>polypyrimidine tract binding protein 1              | <u>EGRF-SP1F</u> | <u>218 - 240</u> | (+) |
| <b>GXP_52180</b> [ <a href="#">GXP_52180</a> ] (1 - 1010)<br><b>Cand1</b> , GXL_42917, GeneID: 117152, Rattus norvegicus chr. 7<br>cullin associated and neddylation disassociated 1 | <u>EGRF-SP1F</u> | <u>603 - 583</u> | (-) |
| <b>GXP_52189</b> [ <a href="#">GXP_52189</a> ] (1 - 1084)<br><b>Cart1</b> , GXL_42926, GeneID: 25401, Rattus norvegicus chr. 7<br>cartilage homeo protein 1                          | <u>EGRF-SP1F</u> | <u>409 - 389</u> | (-) |
|                                                                                                                                                                                      | <u>EGRF-SP1F</u> | <u>679 - 656</u> | (-) |
|                                                                                                                                                                                      | <u>EGRF-SP1F</u> | <u>683 - 661</u> | (-) |
|                                                                                                                                                                                      | <u>EGRF-SP1F</u> | <u>876 - 896</u> | (+) |
| <b>GXP_52203</b> [ <a href="#">GXP_52203</a> ] (1 - 804)<br><b>Plec1</b> , GXL_42940, GeneID: 64204, Rattus norvegicus chr. 7<br>plectin 1                                           | <u>EGRF-SP1F</u> | <u>15 - 35</u>   | (+) |
| <b>GXP_1170757</b> [ <a href="#">GXP_1170757</a> ] (1 - 601)<br><b>Plec1</b> , GXL_42940, GeneID: 64204, Rattus norvegicus chr. 7<br>plectin 1                                       | <u>EGRF-SP1F</u> | <u>128 - 108</u> | (-) |
|                                                                                                                                                                                      | <u>EGRF-SP1F</u> | <u>131 - 110</u> | (-) |
|                                                                                                                                                                                      | <u>EGRF-SP1F</u> | <u>550 - 528</u> | (-) |
| <b>GXP_1418410</b> [ <a href="#">GXP_1418410</a> ] (1 - 605)<br><b>Plec1</b> , GXL_42940, GeneID: 64204, Rattus norvegicus chr. 7<br>plectin 1                                       | <u>EGRF-SP1F</u> | <u>434 - 454</u> | (+) |
| <b>GXP_1418412</b> [ <a href="#">GXP_1418412</a> ] (1 - 662)<br><b>Plec1</b> , GXL_42940, GeneID: 64204, Rattus norvegicus chr. 7<br>plectin 1                                       | <u>EGRF-SP1F</u> | <u>315 - 295</u> | (-) |
| <b>GXP_1418416</b> [ <a href="#">GXP_1418416</a> ] (1 - 657)<br><b>Plec1</b> , GXL_42940, GeneID: 64204, Rattus norvegicus chr. 7<br>plectin 1                                       | <u>EGRF-SP1F</u> | <u>454 - 432</u> | (-) |
|                                                                                                                                                                                      | <u>EGRF-SP1F</u> | <u>459 - 437</u> | (-) |
|                                                                                                                                                                                      | <u>EGRF-SP1F</u> | <u>465 - 442</u> | (-) |
|                                                                                                                                                                                      | <u>EGRF-SP1F</u> | <u>469 - 447</u> | (-) |
| <b>GXP_1418418</b> [ <a href="#">GXP_1418418</a> ] (1 - 602)<br><b>Plec1</b> , GXL_42940, GeneID: 64204, Rattus norvegicus chr. 7<br>plectin 1                                       | <u>EGRF-SP1F</u> | <u>174 - 154</u> | (-) |
|                                                                                                                                                                                      | <u>EGRF-SP1F</u> | <u>177 - 156</u> | (-) |
|                                                                                                                                                                                      | <u>EGRF-SP1F</u> | <u>596 - 574</u> | (-) |
| <b>GXP_52220</b> [ <a href="#">GXP_52220</a> ] (1 - 666)<br><b>Tra1 predicted</b> , GXL_42957, GeneID: 362862, Rattus norvegicus chr. 7<br>tumor rejection antigen gp96 (predicted)  | <u>EGRF-SP1F</u> | <u>616 - 593</u> | (-) |
| <b>GXP_1170421</b> [ <a href="#">GXP_1170421</a> ] (1 - 1063)<br><b>Gef1</b> , GXL_42965, GeneID: 314904, Rattus norvegicus chr. 7<br>RAC/CDC42 exchange factor                      | <u>EGRF-SP1F</u> | <u>198 - 178</u> | (-) |
|                                                                                                                                                                                      | <u>EGRF-SP1F</u> | <u>937 - 915</u> | (-) |

|                                                                                                                                                                                                                               |                           |                           |     |
|-------------------------------------------------------------------------------------------------------------------------------------------------------------------------------------------------------------------------------|---------------------------|---------------------------|-----|
| <b>GXP_1418207</b> [ <a href="#">GXP_1418207</a> ] (1 - 601)<br><b>Geft</b> , GXL_42965, GeneID: 314904, Rattus norvegicus chr. 7<br>RAC/CDC42 exchange factor                                                                | <a href="#">EGRF-SP1F</a> | <a href="#">51 - 27</a>   | (-) |
| <b>GXP_52230</b> [ <a href="#">GXP_52230</a> ] (1 - 601)<br><b>Usp15</b> , GXL_42967, GeneID: 171329, Rattus norvegicus chr. 7<br>ubiquitin specific peptidase 15                                                             | <a href="#">EGRF-SP1F</a> | <a href="#">565 - 588</a> | (+) |
| <b>GXP_52233</b> [ <a href="#">GXP_52233</a> ] (1 - 724)<br><b>Shmt2</b> , GXL_42970, GeneID: 299857, Rattus norvegicus chr. 7<br>serine hydroxymethyltransferase 2 (mitochondrial)                                           | <a href="#">EGRF-SP1F</a> | <a href="#">394 - 418</a> | (+) |
| <b>GXP_52246</b> [ <a href="#">GXP_52246</a> ] (1 - 665)<br><b>Rpl30</b> , GXL_42983, GeneID: 64640, Rattus norvegicus chr. 7<br>ribosomal protein L30                                                                        | <a href="#">EGRF-SP1F</a> | <a href="#">402 - 422</a> | (+) |
| <b>GXP_52262</b> [ <a href="#">GXP_52262</a> ] (1 - 948)<br><b>Hcn2</b> , GXL_42999, GeneID: 114244, Rattus norvegicus chr. 7<br>hyperpolarization activated cyclic nucleotide-gated potassium channel 2                      | <a href="#">EGRF-SP1F</a> | <a href="#">413 - 392</a> | (-) |
| <b>GXP_52275</b> [ <a href="#">GXP_52275</a> ] (1 - 962)<br><b>Ywhaz</b> , GXL_43012, GeneID: 25578, Rattus norvegicus chr. 7<br>tyrosine 3-monooxygenase/tryptophan 5-monooxygenase activation protein, zeta polypeptide     | <a href="#">EGRF-SP1F</a> | <a href="#">137 - 115</a> | (-) |
| <b>GXP_1418271</b> [ <a href="#">GXP_1418271</a> ] (1 - 604)<br><b>Ywhaz</b> , GXL_43012, GeneID: 25578, Rattus norvegicus chr. 7<br>tyrosine 3-monooxygenase/tryptophan 5-monooxygenase activation protein, zeta polypeptide | <a href="#">EGRF-SP1F</a> | <a href="#">877 - 898</a> | (+) |
| <b>GXP_1418272</b> [ <a href="#">GXP_1418272</a> ] (1 - 602)<br><b>Ywhaz</b> , GXL_43012, GeneID: 25578, Rattus norvegicus chr. 7<br>tyrosine 3-monooxygenase/tryptophan 5-monooxygenase activation protein, zeta polypeptide | <a href="#">EGRF-SP1F</a> | <a href="#">269 - 292</a> | (+) |
| <b>GXP_1418273</b> [ <a href="#">GXP_1418273</a> ] (1 - 602)<br><b>Ywhaz</b> , GXL_43012, GeneID: 25578, Rattus norvegicus chr. 7<br>tyrosine 3-monooxygenase/tryptophan 5-monooxygenase activation protein, zeta polypeptide | <a href="#">EGRF-SP1F</a> | <a href="#">522 - 501</a> | (-) |
| <b>GXP_52298</b> [ <a href="#">GXP_52298</a> ] (1 - 1171)<br><b>Tmipo</b> , GXL_43035, GeneID: 25359, Rattus norvegicus chr. 7<br>thymopoietin                                                                                | <a href="#">EGRF-SP1F</a> | <a href="#">526 - 506</a> | (-) |
| <b>GXP_52312</b> [ <a href="#">GXP_52312</a> ] (1 - 649)<br><b>Fstl3</b> , GXL_43049, GeneID: 114031, Rattus norvegicus chr. 7<br>follistatin-like 3                                                                          | <a href="#">EGRF-SP1F</a> | <a href="#">393 - 373</a> | (-) |
| <b>GXP_519485</b> [ <a href="#">GXP_519485</a> ] (1 - 601)<br><b>Suox</b> , GXL_43054, GeneID: 81805, Rattus norvegicus chr. 7<br>sulfite oxidase                                                                             | <a href="#">EGRF-SP1F</a> | <a href="#">376 - 397</a> | (+) |
| <b>GXP_52330</b> [ <a href="#">GXP_52330</a> ] (1 - 689)<br><b>Notch3</b> , GXL_43067, GeneID: 56761, Rattus norvegicus chr. 7<br>Notch gene homolog 3 (Drosophila)                                                           | <a href="#">EGRF-SP1F</a> | <a href="#">464 - 485</a> | (+) |
|                                                                                                                                                                                                                               | <a href="#">EGRF-SP1F</a> | <a href="#">411 - 431</a> | (+) |
|                                                                                                                                                                                                                               | <a href="#">EGRF-SP1F</a> | <a href="#">419 - 443</a> | (+) |
|                                                                                                                                                                                                                               | <a href="#">EGRF-SP1F</a> | <a href="#">582 - 605</a> | (+) |
|                                                                                                                                                                                                                               | <a href="#">EGRF-SP1F</a> | <a href="#">448 - 470</a> | (+) |
|                                                                                                                                                                                                                               | <a href="#">EGRF-SP1F</a> | <a href="#">468 - 490</a> | (+) |
|                                                                                                                                                                                                                               | <a href="#">EGRF-SP1F</a> | <a href="#">639 - 660</a> | (+) |

|                                                                                                                                                                                                                                                                        |                  |                    |     |
|------------------------------------------------------------------------------------------------------------------------------------------------------------------------------------------------------------------------------------------------------------------------|------------------|--------------------|-----|
| <b>GXP_52346</b> [ <a href="#">GXP_52346</a> ] (1 - 821)<br><b>Dgat1</b> , GXL_43083, GeneID: 84497, Rattus norvegicus chr. 7<br>diacylglycerol O-acyltransferase 1                                                                                                    | <u>EGRF-SP1F</u> | <u>650 - 626</u>   | (-) |
| <b>GXP_52355</b> [ <a href="#">GXP_52355</a> ] (1 - 601)<br><b>Tdg</b> , GXL_43092, GeneID: 114521, Rattus norvegicus chr. 7<br>thymine-DNA glycosylase                                                                                                                | <u>EGRF-SP1F</u> | <u>254 - 274</u>   | (+) |
| <b>GXP_52364</b> [ <a href="#">GXP_52364</a> ] (1 - 601)<br><b>Siahbp1</b> , GXL_43101, GeneID: 84401, Rattus norvegicus chr. 7<br>siah binding protein 1, FBP interacting repressor, pyrimidine tract binding splicing factor, Ro ribonucleoprotein-binding protein 1 | <u>EGRF-SP1F</u> | <u>322 - 342</u>   | (+) |
| <b>GXP_52366</b> [ <a href="#">GXP_52366</a> ] (1 - 853)<br><b>Naprt1</b> , GXL_43103, GeneID: 315085, Rattus norvegicus chr. 7<br>nicotinate phosphoribosyltransferase domain containing 1                                                                            | <u>EGRF-SP1F</u> | <u>710 - 689</u>   | (-) |
| <b>GXP_863846</b> [ <a href="#">GXP_863846</a> ] (1 - 601)<br><b>Naprt1</b> , GXL_43103, GeneID: 315085, Rattus norvegicus chr. 7<br>nicotinate phosphoribosyltransferase domain containing 1                                                                          | <u>EGRF-SP1F</u> | <u>137 - 157</u>   | (+) |
| <b>GXP_52398</b> [ <a href="#">GXP_52398</a> ] (1 - 677)<br><b>Vezt</b> , GXL_43135, GeneID: 299738, Rattus norvegicus chr. 7<br>vezatin, adherens junctions transmembrane protein                                                                                     | <u>EGRF-SP1F</u> | <u>392 - 414</u>   | (+) |
| <b>GXP_52405</b> [ <a href="#">GXP_52405</a> ] (1 - 756)<br><b>Nxph4</b> , GXL_43142, GeneID: 59316, Rattus norvegicus chr. 7<br>neurexophilin 4                                                                                                                       | <u>EGRF-SP1F</u> | <u>425 - 405</u>   | (-) |
|                                                                                                                                                                                                                                                                        | <u>EGRF-SP1F</u> | <u>458 - 481</u>   | (+) |
|                                                                                                                                                                                                                                                                        | <u>EGRF-SP1F</u> | <u>501 - 524</u>   | (+) |
| <b>GXP_52448</b> [ <a href="#">GXP_52448</a> ] (1 - 756)<br><b>Glipr1</b> , GXL_43185, GeneID: 299783, Rattus norvegicus chr. 7<br>GLI pathogenesis-related 1 (glioma)                                                                                                 | <u>EGRF-SP1F</u> | <u>368 - 345</u>   | (-) |
|                                                                                                                                                                                                                                                                        | <u>EGRF-SP1F</u> | <u>374 - 352</u>   | (-) |
|                                                                                                                                                                                                                                                                        | <u>EGRF-SP1F</u> | <u>382 - 358</u>   | (-) |
| <b>GXP_52461</b> [ <a href="#">GXP_52461</a> ] (1 - 694)<br><b>Fbxo7</b> , GXL_43198, GeneID: 366854, Rattus norvegicus chr. 7<br>F-box only protein 7                                                                                                                 | <u>EGRF-SP1F</u> | <u>359 - 336</u>   | (-) |
| <b>GXP_1170056</b> [ <a href="#">GXP_1170056</a> ] (1 - 609)<br><b>Fbxo7</b> , GXL_43198, GeneID: 366854, Rattus norvegicus chr. 7<br>F-box only protein 7                                                                                                             | <u>EGRF-SP1F</u> | <u>101 - 78</u>    | (-) |
| <b>GXP_1418136</b> [ <a href="#">GXP_1418136</a> ] (1 - 656)<br><b>Yeats4 predicted</b> , GXL_43224, GeneID: 299810, Rattus norvegicus chr. 7<br>YEATS domain containing 4 (predicted)                                                                                 | <u>EGRF-SP1F</u> | <u>541 - 517</u>   | (-) |
| <b>GXP_52490</b> [ <a href="#">GXP_52490</a> ] (1 - 1079)<br><b>Kcng3</b> , GXL_43227, GeneID: 29682, Rattus norvegicus chr. 7<br>potassium voltage-gated channel, subfamily Q, member 3                                                                               | <u>EGRF-SP1F</u> | <u>505 - 481</u>   | (-) |
|                                                                                                                                                                                                                                                                        | <u>EGRF-SP1F</u> | <u>797 - 777</u>   | (-) |
|                                                                                                                                                                                                                                                                        | <u>EGRF-SP1F</u> | <u>1014 - 993</u>  | (-) |
|                                                                                                                                                                                                                                                                        | <u>EGRF-SP1F</u> | <u>1051 - 1030</u> | (-) |
| <b>GXP_1418044</b> [ <a href="#">GXP_1418044</a> ] (1 - 686)<br><b>Socs2</b> , GXL_43253, GeneID: 84607, Rattus norvegicus chr. 7                                                                                                                                      | <u>EGRF-SP1F</u> | <u>466 - 446</u>   | (-) |

suppressor of cytokine signaling 2

**GXP\_52556** [[GXP\\_52556](#)] (1 - 844)  
**Rab21**, GXL\_43293, GeneID: 299799, Rattus norvegicus chr. 7  
 RAB21, member RAS oncogene family

**GXP\_52578** [[GXP\\_52578](#)] (1 - 614)  
**Ascl1**, GXL\_43315, GeneID: 64186, Rattus norvegicus chr. 7  
 achaete-scute complex homolog-like 1 (Drosophila)

**GXP\_52583** [[GXP\\_52583](#)] (1 - 834)  
**Has2**, GXL\_43320, GeneID: 25694, Rattus norvegicus chr. 7  
 hyaluronan synthase 2

**GXP\_1417835** [[GXP\\_1417835](#)] (1 - 602)  
**Csnk1g2**, GXL\_43324, GeneID: 65278, Rattus norvegicus chr. 7  
 casein kinase 1, gamma 2

**GXP\_1418130** [[GXP\\_1418130](#)] (1 - 1321)  
**Cnot2**, GXL\_43336, GeneID: 299805, Rattus norvegicus chr. 7  
 CCR4-NOT transcription complex, subunit 2

**GXP\_52602** [[GXP\\_52602](#)] (1 - 696)  
**Cyp4f6**, GXL\_43339, GeneID: 266689, Rattus norvegicus chr. 7  
 cytochrome P450 4F6

**GXP\_59022** [[GXP\\_59022](#)] (1 - 1224)  
**Gpr157**, GXL\_48343, GeneID: 313725, Rattus norvegicus chr. 5  
 G protein-coupled receptor 157

**GXP\_59024** [[GXP\\_59024](#)] (1 - 601)  
**Capzb**, GXL\_48345, GeneID: 298584, Rattus norvegicus chr. 5  
 capping protein (actin filament) muscle Z-line, beta

**GXP\_59036** [[GXP\\_59036](#)] (1 - 980)  
**Id3**, GXL\_48357, GeneID: 25585, Rattus norvegicus chr. 5  
 inhibitor of DNA binding 3

**GXP\_1416790** [[GXP\\_1416790](#)] (1 - 736)  
**Plekhg5**, GXL\_48371, GeneID: 310999, Rattus norvegicus chr. 5  
 pleckstrin homology domain containing, family G (with RhoGef domain) member 5

**GXP\_59056** [[GXP\\_59056](#)] (1 - 915)  
**Heyl\_predicted**, GXL\_48377, GeneID: 313575, Rattus norvegicus chr. 5  
 hairy/enhancer-of-split related with YRPW motif-like (predicted)

**GXP\_59059** [[GXP\\_59059](#)] (1 - 601)  
**Pou3f1**, GXL\_48380, GeneID: 192110, Rattus norvegicus chr. 5  
 POU domain, class 3, transcription factor 1

**GXP\_1168288** [[GXP\\_1168288](#)] (1 - 869)  
**Mad2l2**, GXL\_48384, GeneID: 313702, Rattus norvegicus chr. 5

|                           |                             |     |
|---------------------------|-----------------------------|-----|
| <a href="#">EGRF-SP1F</a> | <a href="#">776 - 753</a>   | (-) |
| <a href="#">EGRF-SP1F</a> | <a href="#">779 - 758</a>   | (-) |
| <a href="#">EGRF-SP1F</a> | <a href="#">365 - 344</a>   | (-) |
| <a href="#">EGRF-SP1F</a> | <a href="#">402 - 382</a>   | (-) |
| <a href="#">EGRF-SP1F</a> | <a href="#">437 - 417</a>   | (-) |
| <a href="#">EGRF-SP1F</a> | <a href="#">445 - 465</a>   | (+) |
| <a href="#">EGRF-SP1F</a> | <a href="#">383 - 360</a>   | (-) |
| <a href="#">EGRF-SP1F</a> | <a href="#">1167 - 1144</a> | (-) |
| <a href="#">EGRF-SP1F</a> | <a href="#">1171 - 1149</a> | (-) |
| <a href="#">EGRF-SP1F</a> | <a href="#">1174 - 1154</a> | (-) |
| <a href="#">EGRF-SP1F</a> | <a href="#">282 - 262</a>   | (-) |
| <a href="#">EGRF-SP1F</a> | <a href="#">109 - 130</a>   | (+) |
| <a href="#">EGRF-SP1F</a> | <a href="#">180 - 201</a>   | (+) |
| <a href="#">EGRF-SP1F</a> | <a href="#">307 - 331</a>   | (+) |
| <a href="#">EGRF-SP1F</a> | <a href="#">473 - 451</a>   | (-) |
| <a href="#">EGRF-SP1F</a> | <a href="#">782 - 760</a>   | (-) |
| <a href="#">EGRF-SP1F</a> | <a href="#">426 - 402</a>   | (-) |
| <a href="#">EGRF-SP1F</a> | <a href="#">279 - 299</a>   | (+) |
| <a href="#">EGRF-SP1F</a> | <a href="#">731 - 710</a>   | (-) |
| <a href="#">EGRF-SP1F</a> | <a href="#">31 - 53</a>     | (+) |
| <a href="#">EGRF-SP1F</a> | <a href="#">173 - 196</a>   | (+) |
| <a href="#">EGRF-SP1F</a> | <a href="#">459 - 435</a>   | (-) |

MAD2 mitotic arrest deficient-like 2 (yeast)

**GXP\_59064** [[GXP\\_59064](#)] (1 - 644)

**Lyk4**, GXL\_48385, GeneID: 360230, Rattus norvegicus chr. 5  
Ser/Thr-like protein kinase lyk4

**GXP\_1416774** [[GXP\\_1416774](#)] (1 - 648)

**Slc2a5**, GXL\_48397, GeneID: 65197, Rattus norvegicus chr. 5  
solute carrier family 2, member 5

**GXP\_1416312** [[GXP\\_1416312](#)] (1 - 601)

**Ebna1bp2**, GXL\_48417, GeneID: 114021, Rattus norvegicus chr. 5  
EBNA1 binding protein 2

**GXP\_1416316** [[GXP\\_1416316](#)] (1 - 985)

**Ebna1bp2**, GXL\_48417, GeneID: 114021, Rattus norvegicus chr. 5  
EBNA1 binding protein 2

**GXP\_1416557** [[GXP\\_1416557](#)] (1 - 601)

**Ubx5**, GXL\_48432, GeneID: 192207, Rattus norvegicus chr. 5  
UBX domain containing 5

**GXP\_1416351** [[GXP\\_1416351](#)] (1 - 870)

**Rims3**, GXL\_48441, GeneID: 65025, Rattus norvegicus chr. 5  
regulating synaptic membrane exocytosis 3

**GXP\_59155** [[GXP\\_59155](#)] (1 - 650)

**Hpcal4**, GXL\_48474, GeneID: 50872, Rattus norvegicus chr. 5  
hippocalcin-like 4

**GXP\_1416363** [[GXP\\_1416363](#)] (1 - 903)

**Hpcal4**, GXL\_48474, GeneID: 50872, Rattus norvegicus chr. 5  
hippocalcin-like 4

**GXP\_59157** [[GXP\\_59157](#)] (1 - 859)

**Wnt4**, GXL\_48476, GeneID: 84426, Rattus norvegicus chr. 5  
wingless-related MMTV integration site 4

**GXP\_1416567** [[GXP\\_1416567](#)] (1 - 616)

**Pafah2**, GXL\_48480, GeneID: 313611, Rattus norvegicus chr. 5  
platelet-activating factor acetylhydrolase 2

**GXP\_59171** [[GXP\\_59171](#)] (1 - 760)

**Srm**, GXL\_48490, GeneID: 84596, Rattus norvegicus chr. 5  
spermidine synthase

**GXP\_59178** [[GXP\\_59178](#)] (1 - 679)

**Nt5c1a predicted**, GXL\_48497, GeneID: 313574, Rattus norvegicus chr. 5  
5'-nucleotidase, cytosolic IA (predicted)

**GXP\_59180** [[GXP\\_59180](#)] (1 - 642)

**Nppb**, GXL\_48499, GeneID: 25105, Rattus norvegicus chr. 5  
natriuretic peptide precursor type B

EGRF-SP1F 583 - 603 (+)

EGRF-SP1F 591 - 615 (+)

EGRF-SP1F 44 - 22 (-)

EGRF-SP1F 90 - 113 (+)

EGRF-SP1F 96 - 119 (+)

EGRF-SP1F 215 - 195 (-)

EGRF-SP1F 165 - 189 (+)

EGRF-SP1F 642 - 663 (+)

EGRF-SP1F 106 - 84 (-)

EGRF-SP1F 109 - 88 (-)

EGRF-SP1F 269 - 249 (-)

EGRF-SP1F 635 - 613 (-)

EGRF-SP1F 638 - 617 (-)

EGRF-SP1F 262 - 241 (-)

EGRF-SP1F 118 - 139 (+)

EGRF-SP1F 293 - 316 (+)

EGRF-SP1F 586 - 606 (+)

EGRF-SP1F 441 - 420 (-)

EGRF-SP1F 277 - 299 (+)

|                                                                                                                                                                                                              |                           |                           |     |
|--------------------------------------------------------------------------------------------------------------------------------------------------------------------------------------------------------------|---------------------------|---------------------------|-----|
| <b>GXP_1416448</b> [ <a href="#">GXP_1416448</a> ] (1 - 603)<br><b>Dlgap3</b> , GXL_48527, GeneID: 286923, Rattus norvegicus chr. 5<br>discs, large (Drosophila) homolog-associated protein 3                | <a href="#">EGRF-SP1F</a> | <a href="#">417 - 437</a> | (+) |
| <b>GXP_59209</b> [ <a href="#">GXP_59209</a> ] (1 - 967)<br><b>Nppa</b> , GXL_48528, GeneID: 24602, Rattus norvegicus chr. 5<br>natriuretic peptide precursor type A                                         | <a href="#">EGRF-SP1F</a> | <a href="#">357 - 377</a> | (+) |
| <b>GXP_59216</b> [ <a href="#">GXP_59216</a> ] (1 - 813)<br><b>Casp9</b> , GXL_48535, GeneID: 58918, Rattus norvegicus chr. 5<br>caspase 9                                                                   | <a href="#">EGRF-SP1F</a> | <a href="#">615 - 595</a> | (-) |
| <b>GXP_59218</b> [ <a href="#">GXP_59218</a> ] (1 - 733)<br><b>Grik3</b> , GXL_48537, GeneID: 298521, Rattus norvegicus chr. 5<br>glutamate receptor, ionotropic, kainate 3                                  | <a href="#">EGRF-SP1F</a> | <a href="#">653 - 630</a> | (-) |
| <b>GXP_59251</b> [ <a href="#">GXP_59251</a> ] (1 - 620)<br><b>Mfap2_predicted</b> , GXL_48570, GeneID: 313662, Rattus norvegicus chr. 5<br>microfibrillar-associated protein 2 (predicted)                  | <a href="#">EGRF-SP1F</a> | <a href="#">655 - 635</a> | (-) |
| <b>GXP_59253</b> [ <a href="#">GXP_59253</a> ] (1 - 703)<br><b>Padi2</b> , GXL_48572, GeneID: 29511, Rattus norvegicus chr. 5<br>peptidyl arginine deiminase, type II                                        | <a href="#">EGRF-SP1F</a> | <a href="#">197 - 176</a> | (-) |
| <b>GXP_59270</b> [ <a href="#">GXP_59270</a> ] (1 - 1231)<br><b>Usp48</b> , GXL_48589, GeneID: 362636, Rattus norvegicus chr. 5<br>ubiquitin specific protease 48                                            | <a href="#">EGRF-SP1F</a> | <a href="#">487 - 465</a> | (-) |
| <b>GXP_1168070</b> [ <a href="#">GXP_1168070</a> ] (1 - 1000)<br><b>Gale</b> , GXL_48593, GeneID: 114860, Rattus norvegicus chr. 5<br>galactose-4-epimerase, UDP                                             | <a href="#">EGRF-SP1F</a> | <a href="#">458 - 478</a> | (+) |
| <b>GXP_59279</b> [ <a href="#">GXP_59279</a> ] (1 - 687)<br><b>Acot7</b> , GXL_48598, GeneID: 26759, Rattus norvegicus chr. 5<br>acyl-CoA thioesterase 7                                                     | <a href="#">EGRF-SP1F</a> | <a href="#">460 - 483</a> | (+) |
| <b>GXP_1150373</b> [ <a href="#">GXP_1150373</a> ] (1 - 601)<br><b>Acads</b> , GXL_50825, GeneID: 64304, Rattus norvegicus chr. 12<br>acetyl-Coenzyme A dehydrogenase, short chain                           | <a href="#">EGRF-SP1F</a> | <a href="#">982 - 960</a> | (-) |
| <b>GXP_61679</b> [ <a href="#">GXP_61679</a> ] (1 - 1089)<br><b>Rnf10</b> , GXL_50826, GeneID: 288710, Rattus norvegicus chr. 12<br>ring finger protein 10                                                   | <a href="#">EGRF-SP1F</a> | <a href="#">101 - 81</a>  | (-) |
| <b>GXP_61684</b> [ <a href="#">GXP_61684</a> ] (1 - 631)<br><b>Abcb9</b> , GXL_50831, GeneID: 63886, Rattus norvegicus chr. 12<br>ATP-binding cassette, sub-family B (MDR/TAP), member 9                     | <a href="#">EGRF-SP1F</a> | <a href="#">501 - 478</a> | (-) |
| <b>GXP_1404556</b> [ <a href="#">GXP_1404556</a> ] (1 - 1168)<br><b>Atp2a2</b> , GXL_50840, GeneID: 29693, Rattus norvegicus chr. 12<br>ATPase, Ca <sup>++</sup> transporting, cardiac muscle, slow twitch 2 | <a href="#">EGRF-SP1F</a> | <a href="#">219 - 243</a> | (+) |
|                                                                                                                                                                                                              | <a href="#">EGRF-SP1F</a> | <a href="#">633 - 654</a> | (+) |
|                                                                                                                                                                                                              | <a href="#">EGRF-SP1F</a> | <a href="#">506 - 526</a> | (+) |
|                                                                                                                                                                                                              | <a href="#">EGRF-SP1F</a> | <a href="#">690 - 713</a> | (+) |
|                                                                                                                                                                                                              | <a href="#">EGRF-SP1F</a> | <a href="#">475 - 499</a> | (+) |
|                                                                                                                                                                                                              | <a href="#">EGRF-SP1F</a> | <a href="#">824 - 801</a> | (-) |
|                                                                                                                                                                                                              | <a href="#">EGRF-SP1F</a> | <a href="#">413 - 435</a> | (+) |

|                                                                                                                                                                                                      |                  |                  |     |
|------------------------------------------------------------------------------------------------------------------------------------------------------------------------------------------------------|------------------|------------------|-----|
| <b>GXP_61694</b> [ <a href="#">GXP_61694</a> ] (1 - 754)<br><b>Pxmp2</b> , GXL_50841, GeneID: 29533, Rattus norvegicus chr. 12<br>peroxisomal membrane protein 2                                     |                  |                  |     |
| <b>GXP_61722</b> [ <a href="#">GXP_61722</a> ] (1 - 601)<br><b>Dynll1</b> , GXL_50869, GeneID: 58945, Rattus norvegicus chr. 12<br>dynein light chain LC8-type 1                                     | <u>EGRF-SP1F</u> | <u>280 - 260</u> | (-) |
| <b>GXP_61739</b> [ <a href="#">GXP_61739</a> ] (1 - 827)<br><b>Gtpbp6_predicted</b> , GXL_50886, GeneID: 363931, Rattus norvegicus chr. 12<br>GTP binding protein 6 (putative) (predicted)           | <u>EGRF-SP1F</u> | <u>88 - 68</u>   | (-) |
| <b>GXP_61745</b> [ <a href="#">GXP_61745</a> ] (1 - 1042)<br><b>Tcf1</b> , GXL_50892, GeneID: 24817, Rattus norvegicus chr. 12<br>transcription factor 1                                             | <u>EGRF-SP1F</u> | <u>296 - 317</u> | (+) |
|                                                                                                                                                                                                      | <u>EGRF-SP1F</u> | <u>298 - 319</u> | (+) |
|                                                                                                                                                                                                      | <u>EGRF-SP1F</u> | <u>300 - 321</u> | (+) |
|                                                                                                                                                                                                      | <u>EGRF-SP1F</u> | <u>302 - 323</u> | (+) |
|                                                                                                                                                                                                      | <u>EGRF-SP1F</u> | <u>560 - 582</u> | (+) |
| <b>GXP_61747</b> [ <a href="#">GXP_61747</a> ] (1 - 784)<br><b>Erp29</b> , GXL_50894, GeneID: 117030, Rattus norvegicus chr. 12<br>endoplasmic reticulum protein 29                                  | <u>EGRF-SP1F</u> | <u>419 - 443</u> | (+) |
| <b>GXP_61754</b> [ <a href="#">GXP_61754</a> ] (1 - 647)<br><b>Diablo</b> , GXL_50901, GeneID: 288753, Rattus norvegicus chr. 12<br>diablo homolog (Drosophila)                                      | <u>EGRF-SP1F</u> | <u>169 - 191</u> | (+) |
|                                                                                                                                                                                                      | <u>EGRF-SP1F</u> | <u>174 - 196</u> | (+) |
|                                                                                                                                                                                                      | <u>EGRF-SP1F</u> | <u>179 - 201</u> | (+) |
|                                                                                                                                                                                                      | <u>EGRF-SP1F</u> | <u>244 - 264</u> | (+) |
| <b>GXP_61755</b> [ <a href="#">GXP_61755</a> ] (1 - 707)<br><b>Ptpn11</b> , GXL_50902, GeneID: 25622, Rattus norvegicus chr. 12<br>protein tyrosine phosphatase, non-receptor type 11                | <u>EGRF-SP1F</u> | <u>536 - 516</u> | (-) |
| <b>GXP_61759</b> [ <a href="#">GXP_61759</a> ] (1 - 623)<br><b>Eif2b1</b> , GXL_50906, GeneID: 64514, Rattus norvegicus chr. 12<br>eukaryotic translation initiation factor 2B, subunit 1 alpha      | <u>EGRF-SP1F</u> | <u>326 - 346</u> | (+) |
| <b>GXP_61763</b> [ <a href="#">GXP_61763</a> ] (1 - 635)<br><b>Trpv4</b> , GXL_50910, GeneID: 66026, Rattus norvegicus chr. 12<br>transient receptor potential cation channel, subfamily V, member 4 | <u>EGRF-SP1F</u> | <u>490 - 466</u> | (-) |
| <b>GXP_1404540</b> [ <a href="#">GXP_1404540</a> ] (1 - 682)<br><b>Vps33a</b> , GXL_50912, GeneID: 65081, Rattus norvegicus chr. 12<br>vacuolar protein sorting 33A (yeast)                          | <u>EGRF-SP1F</u> | <u>439 - 415</u> | (-) |
| <b>GXP_1404541</b> [ <a href="#">GXP_1404541</a> ] (1 - 602)<br><b>Vps33a</b> , GXL_50912, GeneID: 65081, Rattus norvegicus chr. 12<br>vacuolar protein sorting 33A (yeast)                          | <u>EGRF-SP1F</u> | <u>561 - 540</u> | (-) |
| <b>GXP_61767</b> [ <a href="#">GXP_61767</a> ] (1 - 601)<br><b>Lnk</b> , GXL_50914, GeneID: 58838, Rattus norvegicus chr. 12<br>linker of T-cell receptor pathways                                   | <u>EGRF-SP1F</u> | <u>265 - 286</u> | (+) |



|                                                                                                                                                                                                |                           |                           |     |
|------------------------------------------------------------------------------------------------------------------------------------------------------------------------------------------------|---------------------------|---------------------------|-----|
| <b>GXP_508171</b> [ <a href="#">GXP_508171</a> ] (1 - 703)<br><b>Mbp</b> , GXL_52005, GeneID: 24547, Rattus norvegicus chr. 18<br>myelin basic protein                                         | <a href="#">EGRF-SP1F</a> | <a href="#">568 - 545</a> | (-) |
| <b>GXP_1404014</b> [ <a href="#">GXP_1404014</a> ] (1 - 602)<br><b>Fgf12</b> , GXL_60581, GeneID: 170630, Rattus norvegicus chr. 11<br>fibroblast growth factor 12                             | <a href="#">EGRF-SP1F</a> | <a href="#">287 - 265</a> | (-) |
| <b>GXP_1404015</b> [ <a href="#">GXP_1404015</a> ] (1 - 756)<br><b>Fgf12</b> , GXL_60581, GeneID: 170630, Rattus norvegicus chr. 11<br>fibroblast growth factor 12                             | <a href="#">EGRF-SP1F</a> | <a href="#">107 - 130</a> | (+) |
|                                                                                                                                                                                                | <a href="#">EGRF-SP1F</a> | <a href="#">114 - 137</a> | (+) |
|                                                                                                                                                                                                | <a href="#">EGRF-SP1F</a> | <a href="#">221 - 242</a> | (+) |
| <b>GXP_72925</b> [ <a href="#">GXP_72925</a> ] (1 - 608)<br><b>Scarf2 predicted</b> , GXL_60614, GeneID: 287949, Rattus norvegicus chr. 11<br>scavenger receptor class F, member 2 (predicted) | <a href="#">EGRF-SP1F</a> | <a href="#">223 - 244</a> | (+) |
|                                                                                                                                                                                                | <a href="#">EGRF-SP1F</a> | <a href="#">225 - 246</a> | (+) |
|                                                                                                                                                                                                | <a href="#">EGRF-SP1F</a> | <a href="#">499 - 523</a> | (+) |
|                                                                                                                                                                                                | <a href="#">EGRF-SP1F</a> | <a href="#">570 - 594</a> | (+) |
| <b>GXP_72937</b> [ <a href="#">GXP_72937</a> ] (1 - 601)<br><b>Dscr1</b> , GXL_60625, GeneID: 266766, Rattus norvegicus chr. 11<br>Down syndrome critical region homolog 1 (human)             | <a href="#">EGRF-SP1F</a> | <a href="#">398 - 419</a> | (+) |
| <b>GXP_1149481</b> [ <a href="#">GXP_1149481</a> ] (1 - 601)<br><b>Txnrd2</b> , GXL_60673, GeneID: 50551, Rattus norvegicus chr. 11<br>thioredoxin reductase 2                                 | <a href="#">EGRF-SP1F</a> | <a href="#">53 - 29</a>   | (-) |
| <b>GXP_72992</b> [ <a href="#">GXP_72992</a> ] (1 - 797)<br><b>P2rxl1</b> , GXL_60679, GeneID: 25041, Rattus norvegicus chr. 11<br>purinergic receptor P2X-like 1, orphan receptor             | <a href="#">EGRF-SP1F</a> | <a href="#">158 - 138</a> | (-) |
| <b>GXP_72995</b> [ <a href="#">GXP_72995</a> ] (1 - 728)<br><b>Ttc3 predicted</b> , GXL_60682, GeneID: 360702, Rattus norvegicus chr. 11<br>tetratricopeptide repeat domain 3 (predicted)      | <a href="#">EGRF-SP1F</a> | <a href="#">549 - 529</a> | (-) |
| <b>GXP_73016</b> [ <a href="#">GXP_73016</a> ] (1 - 601)<br><b>Alcam</b> , GXL_60703, GeneID: 79559, Rattus norvegicus chr. 11<br>activated leukocyte cell adhesion molecule                   | <a href="#">EGRF-SP1F</a> | <a href="#">484 - 464</a> | (-) |
| <b>GXP_73018</b> [ <a href="#">GXP_73018</a> ] (1 - 601)<br><b>Lrrc15</b> , GXL_60705, GeneID: 246296, Rattus norvegicus chr. 11<br>leucine rich repeat containing 15                          | <a href="#">EGRF-SP1F</a> | <a href="#">89 - 69</a>   | (-) |
|                                                                                                                                                                                                | <a href="#">EGRF-SP1F</a> | <a href="#">492 - 472</a> | (-) |
|                                                                                                                                                                                                | <a href="#">EGRF-SP1F</a> | <a href="#">129 - 108</a> | (-) |
|                                                                                                                                                                                                | <a href="#">EGRF-SP1F</a> | <a href="#">131 - 110</a> | (-) |
|                                                                                                                                                                                                | <a href="#">EGRF-SP1F</a> | <a href="#">133 - 112</a> | (-) |
|                                                                                                                                                                                                | <a href="#">EGRF-SP1F</a> | <a href="#">135 - 114</a> | (-) |
| <b>GXP_73033</b> [ <a href="#">GXP_73033</a> ] (1 - 676)<br><b>Bdh1</b> , GXL_60720, GeneID: 117099, Rattus norvegicus chr. 11<br>3-hydroxybutyrate dehydrogenase, type 1                      | <a href="#">EGRF-SP1F</a> | <a href="#">474 - 496</a> | (+) |
| <b>GXP_73036</b> [ <a href="#">GXP_73036</a> ] (1 - 1188)<br><b>Masp1</b> , GXL_60723, GeneID: 64023, Rattus norvegicus chr. 11<br>mannan-binding lectin serine peptidase 1                    | <a href="#">EGRF-SP1F</a> | <a href="#">949 - 929</a> | (-) |

|                                                                                                                                                                                                                                                    |                  |                  |     |
|----------------------------------------------------------------------------------------------------------------------------------------------------------------------------------------------------------------------------------------------------|------------------|------------------|-----|
| <b>GXP_1403943</b> [ <a href="#">GXP_1403943</a> ] (1 - 601)<br><b>Slc12a8</b> , GXL_60751, GeneID: 266733, Rattus norvegicus chr. 11<br>solute carrier family 12 (potassium/chloride transporters), member 8                                      | <u>EGRF-SP1F</u> | <u>478 - 498</u> | (+) |
| <b>GXP_1403856</b> [ <a href="#">GXP_1403856</a> ] (1 - 602)<br><b>Qtrtd1_predicted</b> , GXL_60761, GeneID: 288364, Rattus norvegicus chr. 11<br>queuine tRNA-ribosyltransferase domain containing 1 (predicted)                                  | <u>EGRF-SP1F</u> | <u>300 - 320</u> | (+) |
| <b>GXP_1403858</b> [ <a href="#">GXP_1403858</a> ] (1 - 601)<br><b>Qtrtd1_predicted</b> , GXL_60761, GeneID: 288364, Rattus norvegicus chr. 11<br>queuine tRNA-ribosyltransferase domain containing 1 (predicted)                                  | <u>EGRF-SP1F</u> | <u>114 - 135</u> | (+) |
| <b>GXP_1403741</b> [ <a href="#">GXP_1403741</a> ] (1 - 601)<br><b>Erg</b> , GXL_60785, GeneID: 170909, Rattus norvegicus chr. 11<br>v-ets erythroblastosis virus E26 oncogene like (avian)                                                        | <u>EGRF-SP1F</u> | <u>411 - 390</u> | (-) |
| <b>GXP_73124</b> [ <a href="#">GXP_73124</a> ] (1 - 602)<br><b>St3gal6</b> , GXL_60809, GeneID: 304023, Rattus norvegicus chr. 11<br>ST3 beta-galactoside alpha-2,3-sialyltransferase 6                                                            | <u>EGRF-SP1F</u> | <u>421 - 399</u> | (-) |
| <b>GXP_73139</b> [ <a href="#">GXP_73139</a> ] (1 - 671)<br><b>B4galt4</b> , GXL_60824, GeneID: 303923, Rattus norvegicus chr. 11<br>UDP-Gal:betaGlcNAc beta 1,4-galactosyltransferase, polypeptide 4                                              | <u>EGRF-SP1F</u> | <u>105 - 125</u> | (+) |
| <b>GXP_1403875</b> [ <a href="#">GXP_1403875</a> ] (1 - 601)<br><b>B4galt4</b> , GXL_60824, GeneID: 303923, Rattus norvegicus chr. 11<br>UDP-Gal:betaGlcNAc beta 1,4-galactosyltransferase, polypeptide 4                                          | <u>EGRF-SP1F</u> | <u>531 - 510</u> | (-) |
| <b>GXP_1404054</b> [ <a href="#">GXP_1404054</a> ] (1 - 656)<br><b>Dgkg</b> , GXL_60839, GeneID: 25666, Rattus norvegicus chr. 11<br>diacylglycerol kinase, gamma                                                                                  | <u>EGRF-SP1F</u> | <u>447 - 426</u> | (-) |
| <b>GXP_73158</b> [ <a href="#">GXP_73158</a> ] (1 - 703)<br><b>Ncam2</b> , GXL_60843, GeneID: 288280, Rattus norvegicus chr. 11<br>neural cell adhesion molecule 2                                                                                 | <u>EGRF-SP1F</u> | <u>32 - 55</u>   | (+) |
| <b>GXP_73159</b> [ <a href="#">GXP_73159</a> ] (1 - 601)<br><b>Adamts5</b> , GXL_60844, GeneID: 304135, Rattus norvegicus chr. 11<br>a disintegrin-like and metallopeptidase (reprolysin type) with thrombospondin type 1 motif, 5 (aggrecanase-2) | <u>EGRF-SP1F</u> | <u>462 - 482</u> | (+) |
| <b>GXP_73168</b> [ <a href="#">GXP_73168</a> ] (1 - 955)<br><b>Tnk2</b> , GXL_60853, GeneID: 303882, Rattus norvegicus chr. 11<br>tyrosine kinase, non-receptor, 2                                                                                 | <u>EGRF-SP1F</u> | <u>470 - 492</u> | (+) |
| <b>GXP_1149316</b> [ <a href="#">GXP_1149316</a> ] (1 - 601)<br><b>Tnk2</b> , GXL_60853, GeneID: 303882, Rattus norvegicus chr. 11<br>tyrosine kinase, non-receptor, 2                                                                             | <u>EGRF-SP1F</u> | <u>399 - 423</u> | (+) |
| <b>GXP_1403972</b> [ <a href="#">GXP_1403972</a> ] (1 - 602)<br><b>Tnk2</b> , GXL_60853, GeneID: 303882, Rattus norvegicus chr. 11<br>tyrosine kinase, non-receptor, 2                                                                             | <u>EGRF-SP1F</u> | <u>77 - 53</u>   | (-) |
|                                                                                                                                                                                                                                                    | <u>EGRF-SP1F</u> | <u>272 - 251</u> | (-) |
|                                                                                                                                                                                                                                                    | <u>EGRF-SP1F</u> | <u>273 - 294</u> | (+) |
|                                                                                                                                                                                                                                                    | <u>EGRF-SP1F</u> | <u>435 - 457</u> | (+) |
|                                                                                                                                                                                                                                                    | <u>EGRF-SP1F</u> | <u>393 - 373</u> | (-) |

|                                                                                                                                                                                                                   |                           |                           |     |
|-------------------------------------------------------------------------------------------------------------------------------------------------------------------------------------------------------------------|---------------------------|---------------------------|-----|
| <b>GXP_73173</b> [ <a href="#">GXP_73173</a> ] (1 - 668)<br><b>Cxadr</b> , GXL_60858, GeneID: 89843, Rattus norvegicus chr. 11<br>coxsackie virus and adenovirus receptor                                         | <a href="#">EGRF-SP1F</a> | <a href="#">399 - 375</a> | (-) |
| <b>GXP_73189</b> [ <a href="#">GXP_73189</a> ] (1 - 601)<br><b>Gsk3b</b> , GXL_60874, GeneID: 84027, Rattus norvegicus chr. 11<br>glycogen synthase kinase 3 beta                                                 | <a href="#">EGRF-SP1F</a> | <a href="#">27 - 48</a>   | (+) |
| <b>GXP_73209</b> [ <a href="#">GXP_73209</a> ] (1 - 601)<br><b>Atp5j</b> , GXL_60894, GeneID: 94271, Rattus norvegicus chr. 11<br>ATP synthase, H+ transporting, mitochondrial F0 complex, subunit F6             | <a href="#">EGRF-SP1F</a> | <a href="#">583 - 563</a> | (-) |
| <b>GXP_73215</b> [ <a href="#">GXP_73215</a> ] (1 - 839)<br><b>Cln2</b> , GXL_60900, GeneID: 29232, Rattus norvegicus chr. 11<br>chloride channel 2                                                               | <a href="#">EGRF-SP1F</a> | <a href="#">285 - 308</a> | (+) |
| <b>GXP_73243</b> [ <a href="#">GXP_73243</a> ] (1 - 601)<br><b>Ap2m1</b> , GXL_60928, GeneID: 116563, Rattus norvegicus chr. 11<br>adaptor-related protein complex 2, mu 1 subunit                                | <a href="#">EGRF-SP1F</a> | <a href="#">240 - 220</a> | (-) |
| <b>GXP_73247</b> [ <a href="#">GXP_73247</a> ] (1 - 1041)<br><b>Sfrs10</b> , GXL_60932, GeneID: 117259, Rattus norvegicus chr. 11<br>splicing factor, arginine/serine-rich 10 (transformer 2 homolog, Drosophila) | <a href="#">EGRF-SP1F</a> | <a href="#">868 - 848</a> | (-) |
| <b>GXP_73256</b> [ <a href="#">GXP_73256</a> ] (1 - 601)<br><b>Clic6</b> , GXL_60941, GeneID: 304081, Rattus norvegicus chr. 11<br>chloride intracellular channel 6                                               | <a href="#">EGRF-SP1F</a> | <a href="#">35 - 55</a>   | (+) |
| <b>GXP_73294</b> [ <a href="#">GXP_73294</a> ] (1 - 601)<br><b>Tssk2</b> , GXL_60979, GeneID: 304181, Rattus norvegicus chr. 11<br>testis-specific serine kinase 2                                                | <a href="#">EGRF-SP1F</a> | <a href="#">336 - 313</a> | (-) |
| <b>GXP_73296</b> [ <a href="#">GXP_73296</a> ] (1 - 847)<br><b>lfnar1_predicted</b> , GXL_60981, GeneID: 288264, Rattus norvegicus chr. 11<br>interferon (alpha and beta) receptor 1 (predicted)                  | <a href="#">EGRF-SP1F</a> | <a href="#">667 - 646</a> | (-) |
| <b>GXP_73336</b> [ <a href="#">GXP_73336</a> ] (1 - 739)<br><b>Kcne1</b> , GXL_61021, GeneID: 25471, Rattus norvegicus chr. 11<br>potassium voltage-gated channel, Isk-related subfamily, member 1                | <a href="#">EGRF-SP1F</a> | <a href="#">338 - 318</a> | (-) |
| <b>GXP_73356</b> [ <a href="#">GXP_73356</a> ] (1 - 742)<br><b>Cd47</b> , GXL_61041, GeneID: 29364, Rattus norvegicus chr. 11<br>CD47 antigen (Rh-related antigen, integrin-associated signal transducer)         | <a href="#">EGRF-SP1F</a> | <a href="#">555 - 535</a> | (-) |
| <b>GXP_73359</b> [ <a href="#">GXP_73359</a> ] (1 - 601)<br><b>Adcy5</b> , GXL_61044, GeneID: 64532, Rattus norvegicus chr. 11<br>adenylate cyclase 5                                                             | <a href="#">EGRF-SP1F</a> | <a href="#">282 - 303</a> | (+) |
| <b>GXP_73380</b> [ <a href="#">GXP_73380</a> ] (1 - 775)<br><b>Rtn4r</b> , GXL_61065, GeneID: 113912, Rattus norvegicus chr. 11<br>reticulon 4 receptor                                                           | <a href="#">EGRF-SP1F</a> | <a href="#">350 - 373</a> | (+) |
|                                                                                                                                                                                                                   | <a href="#">EGRF-SP1F</a> | <a href="#">448 - 427</a> | (-) |

|                                                                                                                                                                                                                         |                           |                           |     |
|-------------------------------------------------------------------------------------------------------------------------------------------------------------------------------------------------------------------------|---------------------------|---------------------------|-----|
| <b>GXP_1408509</b> [ <a href="#">GXP_1408509</a> ] (1 - 620)<br><b>Tradd</b> , GXL_64615, GeneID: 246756, Rattus norvegicus chr. 19<br>TNFRSF1A-associated via death domain                                             |                           |                           |     |
| <b>GXP_1408439</b> [ <a href="#">GXP_1408439</a> ] (1 - 601)<br><b>Lphn1</b> , GXL_64617, GeneID: 65096, Rattus norvegicus chr. 19<br>latrophilin 1                                                                     | <a href="#">EGRF-SP1F</a> | <a href="#">196 - 220</a> | (+) |
| <b>GXP_77652</b> [ <a href="#">GXP_77652</a> ] (1 - 721)<br><b>Dhps</b> , GXL_64625, GeneID: 288923, Rattus norvegicus chr. 19<br>deoxyhypusine synthase                                                                | <a href="#">EGRF-SP1F</a> | <a href="#">504 - 526</a> | (+) |
| <b>GXP_77664</b> [ <a href="#">GXP_77664</a> ] (1 - 757)<br><b>Cd97</b> , GXL_64637, GeneID: 361383, Rattus norvegicus chr. 19<br>CD97 antigen                                                                          | <a href="#">EGRF-SP1F</a> | <a href="#">752 - 731</a> | (-) |
| <b>GXP_77688</b> [ <a href="#">GXP_77688</a> ] (1 - 654)<br><b>Tfip11</b> , GXL_64659, GeneID: 288718, Rattus norvegicus chr. 19<br>tuftelin interacting protein 11                                                     | <a href="#">EGRF-SP1F</a> | <a href="#">631 - 608</a> | (-) |
| <b>GXP_77691</b> [ <a href="#">GXP_77691</a> ] (1 - 679)<br><b>Slc12a4</b> , GXL_64661, GeneID: 29501, Rattus norvegicus chr. 19<br>solute carrier family 12, member 4                                                  | <a href="#">EGRF-SP1F</a> | <a href="#">472 - 448</a> | (-) |
| <b>GXP_1408375</b> [ <a href="#">GXP_1408375</a> ] (1 - 603)<br><b>Gpt2_predicted</b> , GXL_64667, GeneID: 307759, Rattus norvegicus chr. 19<br>glutamic pyruvate transaminase (alanine aminotransferase) 2 (predicted) | <a href="#">EGRF-SP1F</a> | <a href="#">332 - 354</a> | (+) |
| <b>GXP_1408573</b> [ <a href="#">GXP_1408573</a> ] (1 - 658)<br><b>Has3</b> , GXL_64675, GeneID: 266805, Rattus norvegicus chr. 19<br>hyaluronan synthase 3                                                             | <a href="#">EGRF-SP1F</a> | <a href="#">121 - 101</a> | (-) |
| <b>GXP_1408533</b> [ <a href="#">GXP_1408533</a> ] (1 - 662)<br><b>Ctcf</b> , GXL_64687, GeneID: 83726, Rattus norvegicus chr. 19<br>CCCTC-binding factor                                                               | <a href="#">EGRF-SP1F</a> | <a href="#">117 - 137</a> | (+) |
|                                                                                                                                                                                                                         | <a href="#">EGRF-SP1F</a> | <a href="#">394 - 415</a> | (+) |
|                                                                                                                                                                                                                         | <a href="#">EGRF-SP1F</a> | <a href="#">414 - 436</a> | (+) |
| <b>GXP_77741</b> [ <a href="#">GXP_77741</a> ] (1 - 683)<br><b>MAST1</b> , GXL_64693, GeneID: 353118, Rattus norvegicus chr. 19<br>microtubule associated serine/threonine kinase 1                                     | <a href="#">EGRF-SP1F</a> | <a href="#">438 - 459</a> | (+) |
|                                                                                                                                                                                                                         | <a href="#">EGRF-SP1F</a> | <a href="#">443 - 465</a> | (+) |
|                                                                                                                                                                                                                         | <a href="#">EGRF-SP1F</a> | <a href="#">447 - 469</a> | (+) |
| <b>GXP_1408401</b> [ <a href="#">GXP_1408401</a> ] (1 - 686)<br><b>MAST1</b> , GXL_64693, GeneID: 353118, Rattus norvegicus chr. 19<br>microtubule associated serine/threonine kinase 1                                 | <a href="#">EGRF-SP1F</a> | <a href="#">505 - 525</a> | (+) |
| <b>GXP_77750</b> [ <a href="#">GXP_77750</a> ] (1 - 601)<br><b>Bcar1</b> , GXL_64702, GeneID: 25414, Rattus norvegicus chr. 19<br>breast cancer anti-estrogen resistance 1                                              | <a href="#">EGRF-SP1F</a> | <a href="#">443 - 422</a> | (-) |
| <b>GXP_508295</b> [ <a href="#">GXP_508295</a> ] (1 - 601)<br><b>Dok4_predicted</b> , GXL_64721, GeneID: 361364, Rattus norvegicus chr. 19<br>docking protein 4 (predicted)                                             | <a href="#">EGRF-SP1F</a> | <a href="#">437 - 413</a> | (-) |

|                                                                                                                                                                                       |                           |                             |     |
|---------------------------------------------------------------------------------------------------------------------------------------------------------------------------------------|---------------------------|-----------------------------|-----|
| <b>GXP_77775</b> [ <a href="#">GXP_77775</a> ] (1 - 1162)<br><b>Egln1</b> , GXL_64725, GeneID: 308913, Rattus norvegicus chr. 19<br>EGL nine homolog 1 (C. elegans)                   | <a href="#">EGRF-SP1F</a> | <a href="#">1122 - 1142</a> | (+) |
| <b>GXP_77781</b> [ <a href="#">GXP_77781</a> ] (1 - 602)<br><b>Gnao</b> , GXL_64729, GeneID: 50664, Rattus norvegicus chr. 19<br>guanine nucleotide binding protein, alpha o          | <a href="#">EGRF-SP1F</a> | <a href="#">1130 - 1152</a> | (+) |
| <b>GXP_1408282</b> [ <a href="#">GXP_1408282</a> ] (1 - 1241)<br><b>Gnao</b> , GXL_64729, GeneID: 50664, Rattus norvegicus chr. 19<br>guanine nucleotide binding protein, alpha o     | <a href="#">EGRF-SP1F</a> | <a href="#">129 - 109</a>   | (-) |
| <b>GXP_77791</b> [ <a href="#">GXP_77791</a> ] (1 - 770)<br><b>Vps4a</b> , GXL_64739, GeneID: 246772, Rattus norvegicus chr. 19<br>vacuolar protein sorting 4a (yeast)                | <a href="#">EGRF-SP1F</a> | <a href="#">734 - 757</a>   | (+) |
| <b>GXP_77808</b> [ <a href="#">GXP_77808</a> ] (1 - 601)<br><b>Pou4f2</b> , GXL_64755, GeneID: 171355, Rattus norvegicus chr. 19<br>POU domain, class 4, transcription factor 2       | <a href="#">EGRF-SP1F</a> | <a href="#">1082 - 1062</a> | (-) |
| <b>GXP_1408268</b> [ <a href="#">GXP_1408268</a> ] (1 - 668)<br><b>Nup93</b> , GXL_64781, GeneID: 291874, Rattus norvegicus chr. 19<br>nucleoporin 93                                 | <a href="#">EGRF-SP1F</a> | <a href="#">247 - 270</a>   | (+) |
| <b>GXP_1408273</b> [ <a href="#">GXP_1408273</a> ] (1 - 647)<br><b>Nup93</b> , GXL_64781, GeneID: 291874, Rattus norvegicus chr. 19<br>nucleoporin 93                                 | <a href="#">EGRF-SP1F</a> | <a href="#">428 - 406</a>   | (-) |
| <b>GXP_77876</b> [ <a href="#">GXP_77876</a> ] (1 - 753)<br><b>Hsd11b2</b> , GXL_64822, GeneID: 25117, Rattus norvegicus chr. 19<br>hydroxysteroid 11-beta dehydrogenase 2            | <a href="#">EGRF-SP1F</a> | <a href="#">432 - 410</a>   | (-) |
| <b>GXP_77881</b> [ <a href="#">GXP_77881</a> ] (1 - 601)<br><b>Gpr56</b> , GXL_64827, GeneID: 260326, Rattus norvegicus chr. 19<br>G protein-coupled receptor 56                      | <a href="#">EGRF-SP1F</a> | <a href="#">453 - 431</a>   | (-) |
| <b>GXP_77885</b> [ <a href="#">GXP_77885</a> ] (1 - 615)<br><b>Glg1</b> , GXL_64831, GeneID: 29476, Rattus norvegicus chr. 19<br>golgi apparatus protein 1                            | <a href="#">EGRF-SP1F</a> | <a href="#">457 - 435</a>   | (-) |
| <b>GXP_77901</b> [ <a href="#">GXP_77901</a> ] (1 - 797)<br><b>Atp6v0d1</b> , GXL_64847, GeneID: 291969, Rattus norvegicus chr. 19<br>ATPase, H+ transporting, V0 subunit D isoform 1 | <a href="#">EGRF-SP1F</a> | <a href="#">459 - 439</a>   | (-) |
| <b>GXP_77913</b> [ <a href="#">GXP_77913</a> ] (1 - 810)<br><b>Cirh1a</b> , GXL_64858, GeneID: 291987, Rattus norvegicus chr. 19                                                      | <a href="#">EGRF-SP1F</a> | <a href="#">420 - 400</a>   | (-) |
|                                                                                                                                                                                       | <a href="#">EGRF-SP1F</a> | <a href="#">390 - 413</a>   | (+) |
|                                                                                                                                                                                       | <a href="#">EGRF-SP1F</a> | <a href="#">387 - 364</a>   | (-) |
|                                                                                                                                                                                       | <a href="#">EGRF-SP1F</a> | <a href="#">389 - 369</a>   | (-) |
|                                                                                                                                                                                       | <a href="#">EGRF-SP1F</a> | <a href="#">436 - 459</a>   | (+) |
|                                                                                                                                                                                       | <a href="#">EGRF-SP1F</a> | <a href="#">447 - 470</a>   | (+) |
|                                                                                                                                                                                       | <a href="#">EGRF-SP1F</a> | <a href="#">588 - 611</a>   | (+) |
|                                                                                                                                                                                       | <a href="#">EGRF-SP1F</a> | <a href="#">462 - 440</a>   | (-) |
|                                                                                                                                                                                       | <a href="#">EGRF-SP1F</a> | <a href="#">540 - 520</a>   | (-) |
|                                                                                                                                                                                       | <a href="#">EGRF-SP1F</a> | <a href="#">96 - 73</a>     | (-) |
|                                                                                                                                                                                       | <a href="#">EGRF-SP1F</a> | <a href="#">348 - 370</a>   | (+) |

cirrhosis, autosomal recessive 1A (human)

**GXP\_77946** [[GXP\\_77946](#)] (1 - 775)

**Cyb5b**, GXL\_64891, GeneID: 80773, Rattus norvegicus chr. 19  
cytochrome b5 type B

**GXP\_77973** [[GXP\\_77973](#)] (1 - 601)

**Siah1a**, GXL\_64918, GeneID: 140941, Rattus norvegicus chr. 19  
seven in absentia 1A

**GXP\_77995** [[GXP\\_77995](#)] (1 - 720)

**Mbtps1**, GXL\_64939, GeneID: 89842, Rattus norvegicus chr. 19  
membrane-bound transcription factor peptidase, site 1

**GXP\_1408707** [[GXP\\_1408707](#)] (1 - 602)

**Mbtps1**, GXL\_64939, GeneID: 89842, Rattus norvegicus chr. 19  
membrane-bound transcription factor peptidase, site 1

**GXP\_77996** [[GXP\\_77996](#)] (1 - 601)

**Maf**, GXL\_64940, GeneID: 54267, Rattus norvegicus chr. 19  
v-maf musculoaponeurotic fibrosarcoma oncogene homolog (avian)

**GXP\_1408490** [[GXP\\_1408490](#)] (1 - 602)

**Mmaa\_predicted**, GXL\_64943, GeneID: 291939, Rattus norvegicus chr. 19  
methylmalonic aciduria (cobalamin deficiency) cblA type (predicted)

**GXP\_1408491** [[GXP\\_1408491](#)] (1 - 601)

**Mmaa\_predicted**, GXL\_64943, GeneID: 291939, Rattus norvegicus chr. 19  
methylmalonic aciduria (cobalamin deficiency) cblA type (predicted)

**GXP\_78006** [[GXP\\_78006](#)] (1 - 601)

**Pkn1**, GXL\_64950, GeneID: 29355, Rattus norvegicus chr. 19  
protein kinase N1

**GXP\_78009** [[GXP\\_78009](#)] (1 - 601)

**Sipa1l2**, GXL\_64953, GeneID: 361442, Rattus norvegicus chr. 19  
signal-induced proliferation-associated 1 like 2

**GXP\_78023** [[GXP\\_78023](#)] (1 - 670)

**Rnf166**, GXL\_64967, GeneID: 365022, Rattus norvegicus chr. 19  
ring finger protein 166

**GXP\_1408743** [[GXP\\_1408743](#)] (1 - 602)

**Rnf166**, GXL\_64967, GeneID: 365022, Rattus norvegicus chr. 19  
ring finger protein 166

**GXP\_78024** [[GXP\\_78024](#)] (1 - 638)

**Pdp2**, GXL\_64968, GeneID: 246311, Rattus norvegicus chr. 19  
pyruvate dehydrogenase phosphatase isoenzyme 2

**GXP\_78025** [[GXP\\_78025](#)] (1 - 1360)

|                           |                           |     |
|---------------------------|---------------------------|-----|
| <a href="#">EGRF-SP1F</a> | <a href="#">358 - 381</a> | (+) |
| <a href="#">EGRF-SP1F</a> | <a href="#">405 - 427</a> | (+) |
| <a href="#">EGRF-SP1F</a> | <a href="#">280 - 258</a> | (-) |
| <a href="#">EGRF-SP1F</a> | <a href="#">286 - 264</a> | (-) |
| <a href="#">EGRF-SP1F</a> | <a href="#">498 - 474</a> | (-) |
| <a href="#">EGRF-SP1F</a> | <a href="#">398 - 421</a> | (+) |
| <a href="#">EGRF-SP1F</a> | <a href="#">26 - 49</a>   | (+) |
| <a href="#">EGRF-SP1F</a> | <a href="#">489 - 469</a> | (-) |
| <a href="#">EGRF-SP1F</a> | <a href="#">501 - 477</a> | (-) |
| <a href="#">EGRF-SP1F</a> | <a href="#">488 - 468</a> | (-) |
| <a href="#">EGRF-SP1F</a> | <a href="#">232 - 212</a> | (-) |
| <a href="#">EGRF-SP1F</a> | <a href="#">383 - 407</a> | (+) |
| <a href="#">EGRF-SP1F</a> | <a href="#">389 - 412</a> | (+) |
| <a href="#">EGRF-SP1F</a> | <a href="#">462 - 439</a> | (-) |
| <a href="#">EGRF-SP1F</a> | <a href="#">472 - 450</a> | (-) |
| <a href="#">EGRF-SP1F</a> | <a href="#">475 - 454</a> | (-) |
| <a href="#">EGRF-SP1F</a> | <a href="#">578 - 554</a> | (-) |
| <a href="#">EGRF-SP1F</a> | <a href="#">405 - 383</a> | (-) |
| <a href="#">EGRF-SP1F</a> | <a href="#">351 - 372</a> | (+) |
| <a href="#">EGRF-SP1F</a> | <a href="#">372 - 349</a> | (-) |

|                                                                                                                                                                                                          |                  |                  |     |
|----------------------------------------------------------------------------------------------------------------------------------------------------------------------------------------------------------|------------------|------------------|-----|
| <b>Rasd2</b> , GXL_64969, GeneID: 171099, Rattus norvegicus chr. 19<br>RASD family, member 2<br><b>GXP_1408292</b> [ <b>GXP_1408292</b> ] (1 - 601)                                                      | <b>EGRF-SP1F</b> | <b>465 - 442</b> | (-) |
| <b>Rasd2</b> , GXL_64969, GeneID: 171099, Rattus norvegicus chr. 19<br>RASD family, member 2<br><b>GXP_78041</b> [ <b>GXP_78041</b> ] (1 - 948)                                                          | <b>EGRF-SP1F</b> | <b>519 - 498</b> | (-) |
| <b>Slc7a5</b> , GXL_64985, GeneID: 50719, Rattus norvegicus chr. 19<br>solute carrier family 7 (cationic amino acid transporter, y+ system), member 5<br><b>GXP_78042</b> [ <b>GXP_78042</b> ] (1 - 757) | <b>EGRF-SP1F</b> | <b>479 - 459</b> | (-) |
| <b>Tomm20</b> , GXL_64986, GeneID: 266601, Rattus norvegicus chr. 19<br>translocase of outer mitochondrial membrane 20 homolog (yeast)<br><b>GXP_78099</b> [ <b>GXP_78099</b> ] (1 - 785)                | <b>EGRF-SP1F</b> | <b>521 - 543</b> | (+) |
| <b>Dnaja2</b> , GXL_65043, GeneID: 84026, Rattus norvegicus chr. 19<br>DnaJ (Hsp40) homolog, subfamily A, member 2<br><b>GXP_1174919</b> [ <b>GXP_1174919</b> ] (1 - 601)                                | <b>EGRF-SP1F</b> | <b>150 - 174</b> | (+) |
| <b>Armxc6</b> , GXL_69230, GeneID: 363496, Rattus norvegicus chr. X<br>armadillo repeat containing, X-linked 6<br><b>GXP_83294</b> [ <b>GXP_83294</b> ] (1 - 647)                                        | <b>EGRF-SP1F</b> | <b>25 - 46</b>   | (+) |
| <b>Bcap31</b> , GXL_69231, GeneID: 293852, Rattus norvegicus chr. X<br>B-cell receptor-associated protein 31<br><b>GXP_83316</b> [ <b>GXP_83316</b> ] (1 - 761)                                          | <b>EGRF-SP1F</b> | <b>134 - 155</b> | (+) |
| <b>Timp1</b> , GXL_69253, GeneID: 116510, Rattus norvegicus chr. X<br>tissue inhibitor of metalloproteinase 1<br><b>GXP_83325</b> [ <b>GXP_83325</b> ] (1 - 664)                                         | <b>EGRF-SP1F</b> | <b>586 - 562</b> | (-) |
| <b>Cacna1f</b> , GXL_69262, GeneID: 114493, Rattus norvegicus chr. X<br>calcium channel, voltage-dependent, alpha 1F subunit<br><b>GXP_83346</b> [ <b>GXP_83346</b> ] (1 - 707)                          | <b>EGRF-SP1F</b> | <b>589 - 610</b> | (+) |
| <b>Gla</b> , GXL_69280, GeneID: 363494, Rattus norvegicus chr. X<br>galactosidase, alpha<br><b>GXP_83374</b> [ <b>GXP_83374</b> ] (1 - 1117)                                                             | <b>EGRF-SP1F</b> | <b>430 - 450</b> | (+) |
| <b>Ndufb1 predicted</b> , GXL_69308, GeneID: 299310, Rattus norvegicus chr. X<br>NADH dehydrogenase (ubiquinone) 1 beta subcomplex, 11 (predicted)<br><b>GXP_83385</b> [ <b>GXP_83385</b> ] (1 - 758)    | <b>EGRF-SP1F</b> | <b>91 - 68</b>   | (-) |
| <b>Igsf1</b> , GXL_69319, GeneID: 302822, Rattus norvegicus chr. X<br>immunoglobulin superfamily, member 1<br><b>GXP_83400</b> [ <b>GXP_83400</b> ] (1 - 1127)                                           | <b>EGRF-SP1F</b> | <b>70 - 46</b>   | (-) |
| <b>Otc</b> , GXL_69334, GeneID: 25611, Rattus norvegicus chr. X<br>ornithine transcarbamylase<br><b>GXP_1421009</b> [ <b>GXP_1421009</b> ] (1 - 1285)                                                    | <b>EGRF-SP1F</b> | <b>560 - 536</b> | (-) |
| <b>Mid1</b> , GXL_69368, GeneID: 54252, Rattus norvegicus chr. X                                                                                                                                         | <b>EGRF-SP1F</b> | <b>415 - 395</b> | (-) |
|                                                                                                                                                                                                          | <b>EGRF-SP1F</b> | <b>427 - 450</b> | (+) |

midline 1

|                                                                                                                                                                                                                            |                           |                           |     |
|----------------------------------------------------------------------------------------------------------------------------------------------------------------------------------------------------------------------------|---------------------------|---------------------------|-----|
| <b>GXP_83441</b> [ <a href="#">GXP_83441</a> ] (1 - 843)<br><b>Sh3kbp1</b> , GXL_69374, GeneID: 84357, Rattus norvegicus chr. X<br>SH3-domain kinase binding protein 1                                                     | <a href="#">EGRF-SP1F</a> | <a href="#">210 - 234</a> | (+) |
| <b>GXP_1421058</b> [ <a href="#">GXP_1421058</a> ] (1 - 640)<br><b>Sh3kbp1</b> , GXL_69374, GeneID: 84357, Rattus norvegicus chr. X<br>SH3-domain kinase binding protein 1                                                 | <a href="#">EGRF-SP1F</a> | <a href="#">470 - 447</a> | (-) |
| <b>GXP_1421059</b> [ <a href="#">GXP_1421059</a> ] (1 - 603)<br><b>Sh3kbp1</b> , GXL_69374, GeneID: 84357, Rattus norvegicus chr. X<br>SH3-domain kinase binding protein 1                                                 | <a href="#">EGRF-SP1F</a> | <a href="#">73 - 53</a>   | (-) |
|                                                                                                                                                                                                                            | <a href="#">EGRF-SP1F</a> | <a href="#">94 - 72</a>   | (-) |
|                                                                                                                                                                                                                            | <a href="#">EGRF-SP1F</a> | <a href="#">257 - 235</a> | (-) |
| <b>GXP_83475</b> [ <a href="#">GXP_83475</a> ] (1 - 602)<br><b>Birc4</b> , GXL_69408, GeneID: 63879, Rattus norvegicus chr. X<br>baculoviral IAP repeat-containing 4                                                       | <a href="#">EGRF-SP1F</a> | <a href="#">545 - 522</a> | (-) |
|                                                                                                                                                                                                                            | <a href="#">EGRF-SP1F</a> | <a href="#">547 - 527</a> | (-) |
|                                                                                                                                                                                                                            | <a href="#">EGRF-SP1F</a> | <a href="#">553 - 533</a> | (-) |
| <b>GXP_1420813</b> [ <a href="#">GXP_1420813</a> ] (1 - 612)<br><b>Birc4</b> , GXL_69408, GeneID: 63879, Rattus norvegicus chr. X<br>baculoviral IAP repeat-containing 4                                                   | <a href="#">EGRF-SP1F</a> | <a href="#">65 - 42</a>   | (-) |
|                                                                                                                                                                                                                            | <a href="#">EGRF-SP1F</a> | <a href="#">67 - 47</a>   | (-) |
|                                                                                                                                                                                                                            | <a href="#">EGRF-SP1F</a> | <a href="#">73 - 53</a>   | (-) |
| <b>GXP_83494</b> [ <a href="#">GXP_83494</a> ] (1 - 977)<br><b>Gdi1</b> , GXL_69427, GeneID: 25183, Rattus norvegicus chr. X<br>guanosine diphosphate dissociation inhibitor 1                                             | <a href="#">EGRF-SP1F</a> | <a href="#">484 - 462</a> | (-) |
| <b>GXP_1421121</b> [ <a href="#">GXP_1421121</a> ] (1 - 601)<br><b>Maged1</b> , GXL_69461, GeneID: 84469, Rattus norvegicus chr. X<br>melanoma antigen, family D, 1                                                        | <a href="#">EGRF-SP1F</a> | <a href="#">226 - 250</a> | (+) |
| <b>GXP_1421197</b> [ <a href="#">GXP_1421197</a> ] (1 - 602)<br><b>Taf9l</b> , GXL_69464, GeneID: 171152, Rattus norvegicus chr. X<br>TAF9-like RNA polymerase II, TATA box binding protein (TBP)-associated factor, 31kDa | <a href="#">EGRF-SP1F</a> | <a href="#">478 - 498</a> | (+) |
|                                                                                                                                                                                                                            | <a href="#">EGRF-SP1F</a> | <a href="#">427 - 403</a> | (-) |
|                                                                                                                                                                                                                            | <a href="#">EGRF-SP1F</a> | <a href="#">433 - 409</a> | (-) |
|                                                                                                                                                                                                                            | <a href="#">EGRF-SP1F</a> | <a href="#">435 - 415</a> | (-) |
| <b>GXP_1421255</b> [ <a href="#">GXP_1421255</a> ] (1 - 752)<br><b>Morf4l2</b> , GXL_69470, GeneID: 317413, Rattus norvegicus chr. X<br>mortality factor 4 like 2                                                          | <a href="#">EGRF-SP1F</a> | <a href="#">165 - 143</a> | (-) |
| <b>GXP_1421256</b> [ <a href="#">GXP_1421256</a> ] (1 - 602)<br><b>Morf4l2</b> , GXL_69470, GeneID: 317413, Rattus norvegicus chr. X<br>mortality factor 4 like 2                                                          | <a href="#">EGRF-SP1F</a> | <a href="#">376 - 354</a> | (-) |
| <b>GXP_1174480</b> [ <a href="#">GXP_1174480</a> ] (1 - 602)<br><b>Rbbp7</b> , GXL_69494, GeneID: 83712, Rattus norvegicus chr. X<br>retinoblastoma binding protein 7                                                      | <a href="#">EGRF-SP1F</a> | <a href="#">91 - 113</a>  | (+) |
| <b>GXP_524271</b> [ <a href="#">GXP_524271</a> ] (1 - 601)<br><b>Foxp3_predicted</b> , GXL_69502, GeneID: 317382, Rattus norvegicus chr. X<br>forkhead box P3 (predicted)                                                  | <a href="#">EGRF-SP1F</a> | <a href="#">510 - 487</a> | (-) |
|                                                                                                                                                                                                                            | <a href="#">EGRF-SP1F</a> | <a href="#">270 - 290</a> | (+) |



|                                                                                                                                                                                                                      |                           |                           |     |
|----------------------------------------------------------------------------------------------------------------------------------------------------------------------------------------------------------------------|---------------------------|---------------------------|-----|
| <b>GXP_83576</b> [ <a href="#">GXP_83576</a> ] (1 - 640)<br><b>Mig12</b> , GXL_69508, GeneID: 404280, Rattus norvegicus chr. X<br>MID1 interacting G12-like protein                                                  |                           |                           |     |
| <b>GXP_83595</b> [ <a href="#">GXP_83595</a> ] (1 - 684)<br><b>Atp1b4</b> , GXL_69526, GeneID: 84396, Rattus norvegicus chr. X<br>ATPase, (Na+)/K+ transporting, beta 4 polypeptide                                  | <a href="#">EGRF-SP1F</a> | <a href="#">123 - 143</a> | (+) |
| <b>GXP_1421286</b> [ <a href="#">GXP_1421286</a> ] (1 - 1106)<br><b>Tsc22d3</b> , GXL_69534, GeneID: 83514, Rattus norvegicus chr. X<br>TSC22 domain family 3                                                        | <a href="#">EGRF-SP1F</a> | <a href="#">632 - 609</a> | (-) |
| <b>GXP_83609</b> [ <a href="#">GXP_83609</a> ] (1 - 810)<br><b>L1cam</b> , GXL_69540, GeneID: 50687, Rattus norvegicus chr. X<br>L1 cell adhesion molecule                                                           | <a href="#">EGRF-SP1F</a> | <a href="#">636 - 614</a> | (-) |
| <b>GXP_1421408</b> [ <a href="#">GXP_1421408</a> ] (1 - 687)<br><b>L1cam</b> , GXL_69540, GeneID: 50687, Rattus norvegicus chr. X<br>L1 cell adhesion molecule                                                       | <a href="#">EGRF-SP1F</a> | <a href="#">595 - 619</a> | (+) |
| <b>GXP_83622</b> [ <a href="#">GXP_83622</a> ] (1 - 1216)<br><b>Rgn</b> , GXL_69553, GeneID: 25106, Rattus norvegicus chr. X<br>regucalcin                                                                           | <a href="#">EGRF-SP1F</a> | <a href="#">466 - 488</a> | (+) |
| <b>GXP_83634</b> [ <a href="#">GXP_83634</a> ] (1 - 635)<br><b>Gripap1</b> , GXL_69565, GeneID: 116493, Rattus norvegicus chr. X<br>GRIP1 associated protein 1                                                       | <a href="#">EGRF-SP1F</a> | <a href="#">335 - 358</a> | (+) |
| <b>GXP_1174253</b> [ <a href="#">GXP_1174253</a> ] (1 - 601)<br><b>Gripap1</b> , GXL_69565, GeneID: 116493, Rattus norvegicus chr. X<br>GRIP1 associated protein 1                                                   | <a href="#">EGRF-SP1F</a> | <a href="#">532 - 512</a> | (-) |
| <b>GXP_1421154</b> [ <a href="#">GXP_1421154</a> ] (1 - 603)<br><b>Slc7a3</b> , GXL_69585, GeneID: 29485, Rattus norvegicus chr. X<br>solute carrier family 7 (cationic amino acid transporter, y+ system), member 3 | <a href="#">EGRF-SP1F</a> | <a href="#">537 - 514</a> | (-) |
| <b>GXP_83663</b> [ <a href="#">GXP_83663</a> ] (1 - 655)<br><b>Atp6ap1</b> , GXL_69594, GeneID: 83615, Rattus norvegicus chr. X<br>ATPase, H+ transporting, lysosomal accessory protein 1                            | <a href="#">EGRF-SP1F</a> | <a href="#">75 - 95</a>   | (+) |
| <b>GXP_1421424</b> [ <a href="#">GXP_1421424</a> ] (1 - 601)<br><b>Atp6ap1</b> , GXL_69594, GeneID: 83615, Rattus norvegicus chr. X<br>ATPase, H+ transporting, lysosomal accessory protein 1                        | <a href="#">EGRF-SP1F</a> | <a href="#">195 - 215</a> | (+) |
| <b>GXP_83674</b> [ <a href="#">GXP_83674</a> ] (1 - 626)<br><b>Apelin</b> , GXL_69605, GeneID: 58812, Rattus norvegicus chr. X<br>apelin, AGTRL1 ligand                                                              | <a href="#">EGRF-SP1F</a> | <a href="#">508 - 485</a> | (-) |
| <b>GXP_1421022</b> [ <a href="#">GXP_1421022</a> ] (1 - 696)<br><b>Gpm6b</b> , GXL_69607, GeneID: 192179, Rattus norvegicus chr. X<br>glycoprotein m6b                                                               | <a href="#">EGRF-SP1F</a> | <a href="#">318 - 295</a> | (-) |
|                                                                                                                                                                                                                      | <a href="#">EGRF-SP1F</a> | <a href="#">396 - 418</a> | (+) |
|                                                                                                                                                                                                                      | <a href="#">EGRF-SP1F</a> | <a href="#">402 - 424</a> | (+) |
|                                                                                                                                                                                                                      | <a href="#">EGRF-SP1F</a> | <a href="#">406 - 430</a> | (+) |
|                                                                                                                                                                                                                      | <a href="#">EGRF-SP1F</a> | <a href="#">289 - 312</a> | (+) |
|                                                                                                                                                                                                                      | <a href="#">EGRF-SP1F</a> | <a href="#">295 - 315</a> | (+) |
|                                                                                                                                                                                                                      | <a href="#">EGRF-SP1F</a> | <a href="#">237 - 213</a> | (-) |

|                                                                                                                                                     |                  |                  |     |
|-----------------------------------------------------------------------------------------------------------------------------------------------------|------------------|------------------|-----|
| <b>GXP_83700</b> [ <a href="#">GXP_83700</a> ] (1 - 602)                                                                                            |                  |                  |     |
| <b>Slc38a5</b> , GXL_69631, GeneID: 192208, Rattus norvegicus chr. X<br>solute carrier family 38, member 5                                          |                  |                  |     |
| <b>GXP_1420900</b> [ <a href="#">GXP_1420900</a> ] (1 - 842)                                                                                        |                  |                  |     |
| <b>Slc38a5</b> , GXL_69631, GeneID: 192208, Rattus norvegicus chr. X<br>solute carrier family 38, member 5                                          | <u>EGRF-SP1F</u> | <u>813 - 791</u> | (-) |
| <b>GXP_1421381</b> [ <a href="#">GXP_1421381</a> ] (1 - 1469)                                                                                       |                  |                  |     |
| <b>Gabra3</b> , GXL_69638, GeneID: 24947, Rattus norvegicus chr. X<br>gamma-aminobutyric acid (GABA-A) receptor, subunit alpha 3                    | <u>EGRF-SP1F</u> | <u>993 - 971</u> | (-) |
| <b>GXP_1421240</b> [ <a href="#">GXP_1421240</a> ] (1 - 628)                                                                                        |                  |                  |     |
| <b>Btk</b> , GXL_69696, GeneID: 367901, Rattus norvegicus chr. X<br>Bruton agammaglobulinemia tyrosine kinase                                       | <u>EGRF-SP1F</u> | <u>375 - 354</u> | (-) |
| <b>GXP_102713</b> [ <a href="#">GXP_102713</a> ] (1 - 648)                                                                                          |                  |                  |     |
| <b>Dgcr14</b> , GXL_86327, GeneID: 360741, Rattus norvegicus chr. 11<br>DiGeorge syndrome critical region gene 14 homolog (human)                   | <u>EGRF-SP1F</u> | <u>510 - 531</u> | (+) |
| <b>GXP_102724</b> [ <a href="#">GXP_102724</a> ] (1 - 830)                                                                                          |                  |                  |     |
| <b>Dgcr2</b> , GXL_86337, GeneID: 360742, Rattus norvegicus chr. 11<br>DiGeorge syndrome critical region gene 2                                     | <u>EGRF-SP1F</u> | <u>237 - 257</u> | (+) |
| <b>GXP_102739</b> [ <a href="#">GXP_102739</a> ] (1 - 1010)                                                                                         |                  |                  |     |
| <b>Slc25a1</b> , GXL_86351, GeneID: 29743, Rattus norvegicus chr. 11<br>solute carrier family 25, member 1                                          | <u>EGRF-SP1F</u> | <u>493 - 513</u> | (+) |
| <b>GXP_1403539</b> [ <a href="#">GXP_1403539</a> ] (1 - 601)                                                                                        |                  |                  |     |
| <b>Sept9</b> , GXL_86458, GeneID: 83788, Rattus norvegicus chr. 10<br>septin 9                                                                      | <u>EGRF-SP1F</u> | <u>803 - 780</u> | (-) |
|                                                                                                                                                     | <u>EGRF-SP1F</u> | <u>424 - 402</u> | (-) |
|                                                                                                                                                     | <u>EGRF-SP1F</u> | <u>430 - 450</u> | (+) |
|                                                                                                                                                     | <u>EGRF-SP1F</u> | <u>590 - 570</u> | (-) |
| <b>GXP_102859</b> [ <a href="#">GXP_102859</a> ] (1 - 837)                                                                                          |                  |                  |     |
| <b>Slc9a3r1</b> , GXL_86465, GeneID: 59114, Rattus norvegicus chr. 10<br>solute carrier family 9 (sodium/hydrogen exchanger), isoform 3 regulator 1 | <u>EGRF-SP1F</u> | <u>92 - 70</u>   | (-) |
| <b>GXP_102869</b> [ <a href="#">GXP_102869</a> ] (1 - 1428)                                                                                         |                  |                  |     |
| <b>Axin2</b> , GXL_86473, GeneID: 29134, Rattus norvegicus chr. 10<br>axin2                                                                         | <u>EGRF-SP1F</u> | <u>209 - 186</u> | (-) |
|                                                                                                                                                     | <u>EGRF-SP1F</u> | <u>213 - 191</u> | (-) |
| <b>GXP_1403405</b> [ <a href="#">GXP_1403405</a> ] (1 - 659)                                                                                        |                  |                  |     |
| <b>Axin2</b> , GXL_86473, GeneID: 29134, Rattus norvegicus chr. 10<br>axin2                                                                         | <u>EGRF-SP1F</u> | <u>452 - 429</u> | (-) |
| <b>GXP_1403441</b> [ <a href="#">GXP_1403441</a> ] (1 - 602)                                                                                        |                  |                  |     |
| <b>Dnai2</b> , GXL_86480, GeneID: 360654, Rattus norvegicus chr. 10<br>dynein, axonemal, intermediate polypeptide 2                                 | <u>EGRF-SP1F</u> | <u>384 - 360</u> | (-) |
| <b>GXP_102880</b> [ <a href="#">GXP_102880</a> ] (1 - 863)                                                                                          |                  |                  |     |
| <b>Slc16a6</b> , GXL_86484, GeneID: 303772, Rattus norvegicus chr. 10<br>solute carrier family 16 (monocarboxylic acid transporters), member 6      | <u>EGRF-SP1F</u> | <u>587 - 564</u> | (-) |
|                                                                                                                                                     | <u>EGRF-SP1F</u> | <u>198 - 177</u> | (-) |

|                                                                                                                                                                                                                |                  |                  |     |
|----------------------------------------------------------------------------------------------------------------------------------------------------------------------------------------------------------------|------------------|------------------|-----|
| <b>GXP_1403408</b> [ <a href="#">GXP_1403408</a> ] (1 - 644)<br><b>Slc16a6</b> , GXL_86484, GeneID: 303772, Rattus norvegicus chr. 10<br>solute carrier family 16 (monocarboxylic acid transporters), member 6 |                  |                  |     |
| <b>GXP_102904</b> [ <a href="#">GXP_102904</a> ] (1 - 773)<br><b>Mrps7</b> , GXL_86508, GeneID: 113958, Rattus norvegicus chr. 10<br>mitochondrial ribosomal protein S7                                        | <u>EGRF-SP1F</u> | <u>260 - 237</u> | (-) |
| <b>GXP_107734</b> [ <a href="#">GXP_107734</a> ] (1 - 1016)<br><b>Vegfc</b> , GXL_90006, GeneID: 114111, Rattus norvegicus chr. 16<br>vascular endothelial growth factor C                                     | <u>EGRF-SP1F</u> | <u>93 - 115</u>  | (+) |
| <b>GXP_107743</b> [ <a href="#">GXP_107743</a> ] (1 - 602)<br><b>Lamp1</b> , GXL_90015, GeneID: 25328, Rattus norvegicus chr. 16<br>lysosomal membrane glycoprotein 1                                          | <u>EGRF-SP1F</u> | <u>434 - 454</u> | (+) |
| <b>GXP_107765</b> [ <a href="#">GXP_107765</a> ] (1 - 723)<br><b>Myo9b</b> , GXL_90036, GeneID: 25486, Rattus norvegicus chr. 16<br>myosin IXb                                                                 | <u>EGRF-SP1F</u> | <u>41 - 61</u>   | (+) |
| <b>GXP_1407147</b> [ <a href="#">GXP_1407147</a> ] (1 - 601)<br><b>Upf3a</b> , GXL_90080, GeneID: 361176, Rattus norvegicus chr. 16<br>UPF3 regulator of nonsense transcripts homolog A (yeast)                | <u>EGRF-SP1F</u> | <u>660 - 640</u> | (-) |
| <b>GXP_107831</b> [ <a href="#">GXP_107831</a> ] (1 - 601)<br><b>Prkcd</b> , GXL_90086, GeneID: 170538, Rattus norvegicus chr. 16<br>protein kinase C, delta                                                   | <u>EGRF-SP1F</u> | <u>476 - 455</u> | (-) |
| <b>GXP_1406736</b> [ <a href="#">GXP_1406736</a> ] (1 - 602)<br><b>Prkcd</b> , GXL_90086, GeneID: 170538, Rattus norvegicus chr. 16<br>protein kinase C, delta                                                 | <u>EGRF-SP1F</u> | <u>353 - 374</u> | (+) |
| <b>GXP_107851</b> [ <a href="#">GXP_107851</a> ] (1 - 751)<br><b>Cacna2d3</b> , GXL_90106, GeneID: 306243, Rattus norvegicus chr. 16<br>calcium channel, voltage-dependent, alpha 2/delta 3 subunit            | <u>EGRF-SP1F</u> | <u>56 - 33</u>   | (-) |
| <b>GXP_1406728</b> [ <a href="#">GXP_1406728</a> ] (1 - 631)<br><b>Chdh</b> , GXL_90115, GeneID: 290551, Rattus norvegicus chr. 16<br>choline dehydrogenase                                                    | <u>EGRF-SP1F</u> | <u>358 - 336</u> | (-) |
| <b>GXP_1406803</b> [ <a href="#">GXP_1406803</a> ] (1 - 611)<br><b>Bmpr1a</b> , GXL_90129, GeneID: 81507, Rattus norvegicus chr. 16<br>bone morphogenetic protein receptor, type 1A                            | <u>EGRF-SP1F</u> | <u>156 - 176</u> | (+) |
| <b>GXP_107885</b> [ <a href="#">GXP_107885</a> ] (1 - 601)<br><b>Lzts1</b> , GXL_90139, GeneID: 266711, Rattus norvegicus chr. 16<br>leucine zipper, putative tumor suppressor 1                               | <u>EGRF-SP1F</u> | <u>337 - 357</u> | (+) |
|                                                                                                                                                                                                                | <u>EGRF-SP1F</u> | <u>468 - 491</u> | (+) |
|                                                                                                                                                                                                                | <u>EGRF-SP1F</u> | <u>479 - 500</u> | (+) |
|                                                                                                                                                                                                                | <u>EGRF-SP1F</u> | <u>200 - 180</u> | (-) |
|                                                                                                                                                                                                                | <u>EGRF-SP1F</u> | <u>202 - 182</u> | (-) |
|                                                                                                                                                                                                                | <u>EGRF-SP1F</u> | <u>365 - 388</u> | (+) |
|                                                                                                                                                                                                                | <u>EGRF-SP1F</u> | <u>491 - 470</u> | (-) |
|                                                                                                                                                                                                                | <u>EGRF-SP1F</u> | <u>420 - 442</u> | (+) |
|                                                                                                                                                                                                                | <u>EGRF-SP1F</u> | <u>425 - 447</u> | (+) |
|                                                                                                                                                                                                                | <u>EGRF-SP1F</u> | <u>430 - 452</u> | (+) |
|                                                                                                                                                                                                                | <u>EGRF-SP1F</u> | <u>440 - 462</u> | (+) |
|                                                                                                                                                                                                                | <u>EGRF-SP1F</u> | <u>685 - 663</u> | (-) |

|                                                                                                                                                                                                           |                           |                           |     |
|-----------------------------------------------------------------------------------------------------------------------------------------------------------------------------------------------------------|---------------------------|---------------------------|-----|
| <b>GXP_107891</b> [ <a href="#">GXP_107891</a> ] (1 - 915)<br><b>Ppp2cb</b> , GXL_90145, GeneID: 24673, Rattus norvegicus chr. 16<br>protein phosphatase 2 (formerly 2A), catalytic subunit, beta isoform |                           |                           |     |
| <b>GXP_1406705</b> [ <a href="#">GXP_1406705</a> ] (1 - 602)<br><b>Arf4</b> , GXL_90154, GeneID: 79120, Rattus norvegicus chr. 16<br>ADP-ribosylation factor 4                                            | <a href="#">EGRF-SP1F</a> | <a href="#">246 - 266</a> | (+) |
| <b>GXP_107911</b> [ <a href="#">GXP_107911</a> ] (1 - 691)<br><b>Fgfr1</b> , GXL_90165, GeneID: 79114, Rattus norvegicus chr. 16<br>Fibroblast growth factor receptor 1                                   | <a href="#">EGRF-SP1F</a> | <a href="#">346 - 326</a> | (-) |
| <b>GXP_107919</b> [ <a href="#">GXP_107919</a> ] (1 - 846)<br><b>Sncg</b> , GXL_90173, GeneID: 64347, Rattus norvegicus chr. 16<br>synuclein, gamma                                                       | <a href="#">EGRF-SP1F</a> | <a href="#">557 - 578</a> | (+) |
| <b>GXP_1406888</b> [ <a href="#">GXP_1406888</a> ] (1 - 602)<br><b>Homer3</b> , GXL_90183, GeneID: 29548, Rattus norvegicus chr. 16<br>homer homolog 3 (Drosophila)                                       | <a href="#">EGRF-SP1F</a> | <a href="#">46 - 67</a>   | (+) |
| <b>GXP_107935</b> [ <a href="#">GXP_107935</a> ] (1 - 1055)<br><b>Dusp4</b> , GXL_90189, GeneID: 60587, Rattus norvegicus chr. 16<br>dual specificity phosphatase 4                                       | <a href="#">EGRF-SP1F</a> | <a href="#">141 - 121</a> | (-) |
| <b>GXP_107937</b> [ <a href="#">GXP_107937</a> ] (1 - 667)<br><b>Slc27a1</b> , GXL_90191, GeneID: 94172, Rattus norvegicus chr. 16<br>solute carrier family 27 (fatty acid transporter), member 1         | <a href="#">EGRF-SP1F</a> | <a href="#">469 - 446</a> | (-) |
| <b>GXP_1407166</b> [ <a href="#">GXP_1407166</a> ] (1 - 601)<br><b>F7</b> , GXL_90200, GeneID: 260320, Rattus norvegicus chr. 16<br>coagulation factor VII                                                | <a href="#">EGRF-SP1F</a> | <a href="#">497 - 475</a> | (-) |
| <b>GXP_107999</b> [ <a href="#">GXP_107999</a> ] (1 - 902)<br><b>Ghitm</b> , GXL_90249, GeneID: 290596, Rattus norvegicus chr. 16<br>growth hormone inducible transmembrane protein                       | <a href="#">EGRF-SP1F</a> | <a href="#">549 - 569</a> | (+) |
| <b>GXP_108003</b> [ <a href="#">GXP_108003</a> ] (1 - 601)<br><b>Casp3</b> , GXL_90253, GeneID: 25402, Rattus norvegicus chr. 16<br>caspase 3, apoptosis related cysteine protease                        | <a href="#">EGRF-SP1F</a> | <a href="#">886 - 863</a> | (-) |
| <b>GXP_108022</b> [ <a href="#">GXP_108022</a> ] (1 - 601)<br><b>Itih3</b> , GXL_90272, GeneID: 50693, Rattus norvegicus chr. 16<br>inter-alpha trypsin inhibitor, heavy chain 3                          | <a href="#">EGRF-SP1F</a> | <a href="#">454 - 431</a> | (-) |
| <b>GXP_108068</b> [ <a href="#">GXP_108068</a> ] (1 - 795)<br><b>Mustn1</b> , GXL_90318, GeneID: 290553, Rattus norvegicus chr. 16<br>musculoskeletal, embryonic nuclear protein 1                        | <a href="#">EGRF-SP1F</a> | <a href="#">465 - 442</a> | (-) |
| <b>GXP_1407121</b> [ <a href="#">GXP_1407121</a> ] (1 - 601)<br><b>Vps36 predicted</b> , GXL_90322, GeneID: 290851, Rattus norvegicus chr. 16<br>vacuolar protein sorting 36 (yeast) (predicted)          | <a href="#">EGRF-SP1F</a> | <a href="#">369 - 389</a> | (+) |
|                                                                                                                                                                                                           | <a href="#">EGRF-SP1F</a> | <a href="#">368 - 388</a> | (+) |
|                                                                                                                                                                                                           | <a href="#">EGRF-SP1F</a> | <a href="#">225 - 245</a> | (+) |
|                                                                                                                                                                                                           | <a href="#">EGRF-SP1F</a> | <a href="#">124 - 104</a> | (-) |

|                                                                                                                                                                                                                            |                           |                           |     |
|----------------------------------------------------------------------------------------------------------------------------------------------------------------------------------------------------------------------------|---------------------------|---------------------------|-----|
| <b>GXP_108098</b> [ <a href="#">GXP_108098</a> ] (1 - 601)<br><b>Mk1</b> , GXL_90348, GeneID: 171436, Rattus norvegicus chr. 16<br>Mk1 protein                                                                             |                           |                           |     |
| <b>GXP_108112</b> [ <a href="#">GXP_108112</a> ] (1 - 672)<br><b>Spfh2 predicted</b> , GXL_90362, GeneID: 290823, Rattus norvegicus chr. 16<br>SPFH domain family, member 2 (predicted)                                    | <a href="#">EGRF-SP1F</a> | <a href="#">476 - 456</a> | (-) |
| <b>GXP_1406943</b> [ <a href="#">GXP_1406943</a> ] (1 - 768)<br><b>Sh3md2</b> , GXL_90363, GeneID: 306417, Rattus norvegicus chr. 16<br>putative scaffolding protein POSH                                                  | <a href="#">EGRF-SP1F</a> | <a href="#">594 - 572</a> | (-) |
| <b>GXP_108117</b> [ <a href="#">GXP_108117</a> ] (1 - 601)<br><b>B3gnt3 predicted</b> , GXL_90367, GeneID: 290638, Rattus norvegicus chr. 16<br>UDP-GlcNAc:betaGal beta-1, 3-N-acetylglucosaminyltransferase 3 (predicted) | <a href="#">EGRF-SP1F</a> | <a href="#">201 - 181</a> | (-) |
|                                                                                                                                                                                                                            | <a href="#">EGRF-SP1F</a> | <a href="#">443 - 423</a> | (-) |
|                                                                                                                                                                                                                            | <a href="#">EGRF-SP1F</a> | <a href="#">449 - 427</a> | (-) |
| <b>GXP_1406725</b> [ <a href="#">GXP_1406725</a> ] (1 - 967)<br><b>Wnt5a</b> , GXL_90368, GeneID: 64566, Rattus norvegicus chr. 16<br>wingless-type MMTV integration site 5A                                               | <a href="#">EGRF-SP1F</a> | <a href="#">433 - 457</a> | (+) |
| <b>GXP_108131</b> [ <a href="#">GXP_108131</a> ] (1 - 745)<br><b>Sh3bp5</b> , GXL_90381, GeneID: 117186, Rattus norvegicus chr. 16<br>SH3-domain binding protein 5 (BTK-associated)                                        | <a href="#">EGRF-SP1F</a> | <a href="#">35 - 55</a>   | (+) |
| <b>GXP_1406767</b> [ <a href="#">GXP_1406767</a> ] (1 - 620)<br><b>Sh3bp5</b> , GXL_90381, GeneID: 117186, Rattus norvegicus chr. 16<br>SH3-domain binding protein 5 (BTK-associated)                                      | <a href="#">EGRF-SP1F</a> | <a href="#">37 - 16</a>   | (-) |
| <b>GXP_108137</b> [ <a href="#">GXP_108137</a> ] (1 - 1150)<br><b>Nr2f6</b> , GXL_90387, GeneID: 245980, Rattus norvegicus chr. 16<br>nuclear receptor subfamily 2, group F, member 6                                      | <a href="#">EGRF-SP1F</a> | <a href="#">159 - 136</a> | (-) |
|                                                                                                                                                                                                                            | <a href="#">EGRF-SP1F</a> | <a href="#">360 - 382</a> | (+) |
|                                                                                                                                                                                                                            | <a href="#">EGRF-SP1F</a> | <a href="#">475 - 498</a> | (+) |
|                                                                                                                                                                                                                            | <a href="#">EGRF-SP1F</a> | <a href="#">71 - 51</a>   | (-) |
| <b>GXP_1153595</b> [ <a href="#">GXP_1153595</a> ] (1 - 601)<br><b>Nr2f6</b> , GXL_90387, GeneID: 245980, Rattus norvegicus chr. 16<br>nuclear receptor subfamily 2, group F, member 6                                     | <a href="#">EGRF-SP1F</a> | <a href="#">80 - 59</a>   | (-) |
| <b>GXP_108154</b> [ <a href="#">GXP_108154</a> ] (1 - 1099)<br><b>Glt8d1</b> , GXL_90404, GeneID: 306253, Rattus norvegicus chr. 16<br>glycosyltransferase 8 domain containing 1                                           | <a href="#">EGRF-SP1F</a> | <a href="#">953 - 931</a> | (-) |
|                                                                                                                                                                                                                            | <a href="#">EGRF-SP1F</a> | <a href="#">959 - 936</a> | (-) |
|                                                                                                                                                                                                                            | <a href="#">EGRF-SP1F</a> | <a href="#">961 - 941</a> | (-) |
| <b>GXP_108156</b> [ <a href="#">GXP_108156</a> ] (1 - 728)<br><b>Aadat</b> , GXL_90406, GeneID: 29416, Rattus norvegicus chr. 16<br>aminoadipate aminotransferase                                                          | <a href="#">EGRF-SP1F</a> | <a href="#">398 - 374</a> | (-) |
| <b>GXP_1407005</b> [ <a href="#">GXP_1407005</a> ] (1 - 616)<br><b>Argbp2</b> , GXL_90408, GeneID: 114901, Rattus norvegicus chr. 16<br>Arg/Abl-interacting protein ArgBP2                                                 | <a href="#">EGRF-SP1F</a> | <a href="#">133 - 113</a> | (-) |
| <b>GXP_1406873</b> [ <a href="#">GXP_1406873</a> ] (1 - 602)<br><b>Rab3a</b> , GXL_90422, GeneID: 25531, Rattus norvegicus chr. 16<br>RAB3A, member RAS oncogene family                                                    | <a href="#">EGRF-SP1F</a> | <a href="#">22 - 1</a>    | (-) |
|                                                                                                                                                                                                                            | <a href="#">EGRF-SP1F</a> | <a href="#">26 - 5</a>    | (-) |

|                                                                                                                                              |                           |                           |     |
|----------------------------------------------------------------------------------------------------------------------------------------------|---------------------------|---------------------------|-----|
| <b>GXP_114847</b> [ <a href="#">GXP_114847</a> ] (1 - 1087)                                                                                  | <a href="#">EGRF-SP1F</a> | <a href="#">178 - 198</a> | (+) |
| <b>Edn1</b> , GXL_96186, GeneID: 24323, Rattus norvegicus chr. 17<br>endothelin 1                                                            | <a href="#">EGRF-SP1F</a> | <a href="#">304 - 327</a> | (+) |
|                                                                                                                                              | <a href="#">EGRF-SP1F</a> | <a href="#">306 - 329</a> | (+) |
| <b>GXP_1407411</b> [ <a href="#">GXP_1407411</a> ] (1 - 602)                                                                                 | <a href="#">EGRF-SP1F</a> | <a href="#">421 - 443</a> | (+) |
| <b>Tcfap2a_predicted</b> , GXL_96212, GeneID: 306862, Rattus norvegicus chr. 17<br>transcription factor AP-2, alpha (predicted)              |                           |                           |     |
| <b>GXP_114900</b> [ <a href="#">GXP_114900</a> ] (1 - 606)                                                                                   | <a href="#">EGRF-SP1F</a> | <a href="#">116 - 96</a>  | (-) |
| <b>Kif27</b> , GXL_96239, GeneID: 246209, Rattus norvegicus chr. 17<br>kinesin family member 27                                              |                           |                           |     |
| <b>GXP_114905</b> [ <a href="#">GXP_114905</a> ] (1 - 772)                                                                                   | <a href="#">EGRF-SP1F</a> | <a href="#">352 - 332</a> | (-) |
| <b>Smad5</b> , GXL_96244, GeneID: 59328, Rattus norvegicus chr. 17<br>MAD homolog 5 (Drosophila)                                             |                           |                           |     |
| <b>GXP_1407270</b> [ <a href="#">GXP_1407270</a> ] (1 - 669)                                                                                 | <a href="#">EGRF-SP1F</a> | <a href="#">437 - 458</a> | (+) |
| <b>Smad5</b> , GXL_96244, GeneID: 59328, Rattus norvegicus chr. 17<br>MAD homolog 5 (Drosophila)                                             | <a href="#">EGRF-SP1F</a> | <a href="#">446 - 467</a> | (+) |
|                                                                                                                                              | <a href="#">EGRF-SP1F</a> | <a href="#">450 - 472</a> | (+) |
| <b>GXP_114917</b> [ <a href="#">GXP_114917</a> ] (1 - 601)                                                                                   | <a href="#">EGRF-SP1F</a> | <a href="#">490 - 470</a> | (-) |
| <b>Srd5a1</b> , GXL_96256, GeneID: 24950, Rattus norvegicus chr. 17<br>steroid 5 alpha-reductase 1                                           |                           |                           |     |
| <b>GXP_1154201</b> [ <a href="#">GXP_1154201</a> ] (1 - 601)                                                                                 | <a href="#">EGRF-SP1F</a> | <a href="#">402 - 382</a> | (-) |
| <b>Srd5a1</b> , GXL_96256, GeneID: 24950, Rattus norvegicus chr. 17<br>steroid 5 alpha-reductase 1                                           |                           |                           |     |
| <b>GXP_1154202</b> [ <a href="#">GXP_1154202</a> ] (1 - 1216)                                                                                | <a href="#">EGRF-SP1F</a> | <a href="#">62 - 85</a>   | (+) |
| <b>Srd5a1</b> , GXL_96256, GeneID: 24950, Rattus norvegicus chr. 17<br>steroid 5 alpha-reductase 1                                           | <a href="#">EGRF-SP1F</a> | <a href="#">68 - 88</a>   | (+) |
|                                                                                                                                              | <a href="#">EGRF-SP1F</a> | <a href="#">87 - 107</a>  | (+) |
|                                                                                                                                              | <a href="#">EGRF-SP1F</a> | <a href="#">292 - 316</a> | (+) |
|                                                                                                                                              | <a href="#">EGRF-SP1F</a> | <a href="#">565 - 541</a> | (-) |
| <b>GXP_114924</b> [ <a href="#">GXP_114924</a> ] (1 - 660)                                                                                   | <a href="#">EGRF-SP1F</a> | <a href="#">571 - 547</a> | (-) |
| <b>Mak10</b> , GXL_96263, GeneID: 64472, Rattus norvegicus chr. 17<br>MAK10 homolog, amino-acid N-acetyltransferase subunit, (S. cerevisiae) |                           |                           |     |
| <b>GXP_114935</b> [ <a href="#">GXP_114935</a> ] (1 - 748)                                                                                   | <a href="#">EGRF-SP1F</a> | <a href="#">423 - 446</a> | (+) |
| <b>Sephs1</b> , GXL_96274, GeneID: 291314, Rattus norvegicus chr. 17<br>selenophosphate synthetase 1                                         |                           |                           |     |
| <b>GXP_114947</b> [ <a href="#">GXP_114947</a> ] (1 - 793)                                                                                   | <a href="#">EGRF-SP1F</a> | <a href="#">453 - 474</a> | (+) |
| <b>Sncb</b> , GXL_96286, GeneID: 113893, Rattus norvegicus chr. 17<br>synuclein, beta                                                        |                           |                           |     |
| <b>GXP_1407332</b> [ <a href="#">GXP_1407332</a> ] (1 - 602)                                                                                 | <a href="#">EGRF-SP1F</a> | <a href="#">402 - 380</a> | (-) |
| <b>Nfil3</b> , GXL_96293, GeneID: 114519, Rattus norvegicus chr. 17<br>nuclear factor, interleukin 3 regulated                               | <a href="#">EGRF-SP1F</a> | <a href="#">407 - 385</a> | (-) |
| <b>GXP_114992</b> [ <a href="#">GXP_114992</a> ] (1 - 673)                                                                                   | <a href="#">EGRF-SP1F</a> | <a href="#">347 - 367</a> | (+) |
| <b>Dek</b> , GXL_96330, GeneID: 306817, Rattus norvegicus chr. 17                                                                            |                           |                           |     |

|                                                                               |                  |                  |     |
|-------------------------------------------------------------------------------|------------------|------------------|-----|
| DEK oncogene (DNA binding)                                                    | <u>EGRF-SP1F</u> | <u>408 - 428</u> | (+) |
| <b>GXP_1407365</b> [ <u>GXP_1407365</u> ] (1 - 609)                           |                  |                  |     |
| <b>Dek</b> , GXL_96330, GeneID: 306817, Rattus norvegicus chr. 17             | <u>EGRF-SP1F</u> | <u>542 - 565</u> | (+) |
| DEK oncogene (DNA binding)                                                    |                  |                  |     |
| <b>GXP_115021</b> [ <u>GXP_115021</u> ] (1 - 647)                             |                  |                  |     |
| <b>Nedd9</b> , GXL_96359, GeneID: 291044, Rattus norvegicus chr. 17           | <u>EGRF-SP1F</u> | <u>427 - 404</u> | (-) |
| neural precursor cell expressed, developmentally down-regulated gene 9        |                  |                  |     |
| <b>GXP_1407401</b> [ <u>GXP_1407401</u> ] (1 - 603)                           |                  |                  |     |
| <b>Nedd9</b> , GXL_96359, GeneID: 291044, Rattus norvegicus chr. 17           | <u>EGRF-SP1F</u> | <u>2 - 22</u>    | (+) |
| neural precursor cell expressed, developmentally down-regulated gene 9        |                  |                  |     |
| <b>GXP_115023</b> [ <u>GXP_115023</u> ] (1 - 918)                             | <u>EGRF-SP1F</u> | <u>560 - 537</u> | (-) |
| <b>Bicd2</b> , GXL_96361, GeneID: 306809, Rattus norvegicus chr. 17           | <u>EGRF-SP1F</u> | <u>563 - 542</u> | (-) |
| bicaudal D homolog 2 (Drosophila)                                             | <u>EGRF-SP1F</u> | <u>537 - 557</u> | (+) |
| <b>GXP_115032</b> [ <u>GXP_115032</u> ] (1 - 999)                             | <u>EGRF-SP1F</u> | <u>539 - 562</u> | (+) |
| <b>Barx1 predicted</b> , GXL_96369, GeneID: 364680, Rattus norvegicus chr. 17 |                  |                  |     |
| BarH-like homeobox 1 (predicted)                                              | <u>EGRF-SP1F</u> | <u>466 - 446</u> | (-) |
| <b>GXP_1407671</b> [ <u>GXP_1407671</u> ] (1 - 731)                           |                  |                  |     |
| <b>Nmt2</b> , GXL_96381, GeneID: 291318, Rattus norvegicus chr. 17            | <u>EGRF-SP1F</u> | <u>444 - 421</u> | (-) |
| N-myristoyltransferase 2                                                      | <u>EGRF-SP1F</u> | <u>455 - 432</u> | (-) |
| <b>GXP_115063</b> [ <u>GXP_115063</u> ] (1 - 675)                             | <u>EGRF-SP1F</u> | <u>460 - 437</u> | (-) |
| <b>Mxd3</b> , GXL_96400, GeneID: 252915, Rattus norvegicus chr. 17            | <u>EGRF-SP1F</u> | <u>469 - 448</u> | (-) |
| Max dimerization protein 3                                                    |                  |                  |     |
| <b>GXP_115066</b> [ <u>GXP_115066</u> ] (1 - 601)                             |                  |                  |     |
| <b>Ddx46</b> , GXL_96403, GeneID: 245957, Rattus norvegicus chr. 17           | <u>EGRF-SP1F</u> | <u>83 - 105</u>  | (+) |
| DEAD (Asp-Glu-Ala-Asp) box polypeptide 46                                     |                  |                  |     |
| <b>GXP_115096</b> [ <u>GXP_115096</u> ] (1 - 601)                             |                  |                  |     |
| <b>Neurod3</b> , GXL_96433, GeneID: 29410, Rattus norvegicus chr. 17          | <u>EGRF-SP1F</u> | <u>326 - 303</u> | (-) |
| neurogenic differentiation 3                                                  |                  |                  |     |
| <b>GXP_115097</b> [ <u>GXP_115097</u> ] (1 - 601)                             | <u>EGRF-SP1F</u> | <u>365 - 344</u> | (-) |
| <b>Arid4b</b> , GXL_96434, GeneID: 84481, Rattus norvegicus chr. 17           | <u>EGRF-SP1F</u> | <u>445 - 425</u> | (-) |
| AT rich interactive domain 4B (Rbp1 like)                                     |                  |                  |     |
| <b>GXP_1407262</b> [ <u>GXP_1407262</u> ] (1 - 602)                           |                  |                  |     |
| <b>Gkap1</b> , GXL_96435, GeneID: 361202, Rattus norvegicus chr. 17           | <u>EGRF-SP1F</u> | <u>472 - 494</u> | (+) |
| G kinase anchoring protein 1                                                  |                  |                  |     |
| <b>GXP_115122</b> [ <u>GXP_115122</u> ] (1 - 758)                             |                  |                  |     |
| <b>Gprk6</b> , GXL_96459, GeneID: 59076, Rattus norvegicus chr. 17            | <u>EGRF-SP1F</u> | <u>469 - 447</u> | (-) |
| G protein-coupled receptor kinase 6                                           |                  |                  |     |
| <b>GXP_115125</b> [ <u>GXP_115125</u> ] (1 - 756)                             | <u>EGRF-SP1F</u> | <u>176 - 200</u> | (+) |

|                                                                                                                                                                                                             |                  |                    |     |
|-------------------------------------------------------------------------------------------------------------------------------------------------------------------------------------------------------------|------------------|--------------------|-----|
| <b>Hk3</b> , GXL_96462, GeneID: 25060, Rattus norvegicus chr. 17<br>hexokinase 3<br><b>GXP_115131</b> [ <a href="#">GXP_115131</a> ] (1 - 601)                                                              | <u>EGRF-SP1F</u> | <u>182 - 202</u>   | (+) |
| <b>Ctsl</b> , GXL_96468, GeneID: 25697, Rattus norvegicus chr. 17<br>cathepsin L<br><b>GXP_1407507</b> [ <a href="#">GXP_1407507</a> ] (1 - 816)                                                            | <u>EGRF-SP1F</u> | <u>562 - 585</u>   | (+) |
| <b>Inhba</b> , GXL_96480, GeneID: 29200, Rattus norvegicus chr. 17<br>inhibin beta-A<br><b>GXP_115144</b> [ <a href="#">GXP_115144</a> ] (1 - 684)                                                          | <u>EGRF-SP1F</u> | <u>261 - 282</u>   | (+) |
| <b>Serpinc6b</b> , GXL_96481, GeneID: 364705, Rattus norvegicus chr. 17<br>serine (or cysteine) proteinase inhibitor, clade B, member 6b<br><b>GXP_1154243</b> [ <a href="#">GXP_1154243</a> ] (1 - 794)    | <u>EGRF-SP1F</u> | <u>498 - 521</u>   | (+) |
| <b>Fbp1</b> , GXL_96520, GeneID: 24362, Rattus norvegicus chr. 17<br>fructose-1,6- biphosphatase 1<br><b>GXP_115189</b> [ <a href="#">GXP_115189</a> ] (1 - 601)                                            | <u>EGRF-SP1F</u> | <u>276 - 255</u>   | (-) |
| <b>Hist1h1t</b> , GXL_96526, GeneID: 24438, Rattus norvegicus chr. 17<br>histone cluster 1, H1t<br><b>GXP_115194</b> [ <a href="#">GXP_115194</a> ] (1 - 1225)                                              | <u>EGRF-SP1F</u> | <u>438 - 417</u>   | (-) |
| <b>St8sia6</b> , GXL_96531, GeneID: 291325, Rattus norvegicus chr. 17<br>ST8 alpha-N-acetyl-neuraminide alpha-2, 8-sialyltransferase 6<br><b>GXP_115212</b> [ <a href="#">GXP_115212</a> ] (1 - 667)        | <u>EGRF-SP1F</u> | <u>1017 - 995</u>  | (-) |
| <b>Exoc2</b> , GXL_96549, GeneID: 171455, Rattus norvegicus chr. 17<br>exocyst complex component 2<br><b>GXP_115217</b> [ <a href="#">GXP_115217</a> ] (1 - 662)                                            | <u>EGRF-SP1F</u> | <u>1197 - 1221</u> | (+) |
| <b>Uqcrcf1</b> , GXL_96554, GeneID: 291103, Rattus norvegicus chr. 17<br>ubiquinol-cytochrome c reductase, Rieske iron-sulfur polypeptide 1<br><b>GXP_1407220</b> [ <a href="#">GXP_1407220</a> ] (1 - 739) | <u>EGRF-SP1F</u> | <u>461 - 482</u>   | (+) |
| <b>Ptch1</b> , GXL_96558, GeneID: 89830, Rattus norvegicus chr. 17<br>patched homolog 1 (Drosophila)<br><b>GXP_1407362</b> [ <a href="#">GXP_1407362</a> ] (1 - 603)                                        | <u>EGRF-SP1F</u> | <u>379 - 399</u>   | (+) |
| <b>Id4</b> , GXL_96561, GeneID: 291023, Rattus norvegicus chr. 17<br>inhibitor of DNA binding 4<br><b>GXP_115225</b> [ <a href="#">GXP_115225</a> ] (1 - 669)                                               | <u>EGRF-SP1F</u> | <u>232 - 252</u>   | (+) |
| <b>Ninj1</b> , GXL_96562, GeneID: 25338, Rattus norvegicus chr. 17<br>ninjurin 1<br><b>GXP_1407300</b> [ <a href="#">GXP_1407300</a> ] (1 - 602)                                                            | <u>EGRF-SP1F</u> | <u>401 - 379</u>   | (-) |
| <b>Dbn1</b> , GXL_96581, GeneID: 81653, Rattus norvegicus chr. 17<br>drebrin 1<br><b>GXP_115901</b> [ <a href="#">GXP_115901</a> ] (1 - 608)                                                                | <u>EGRF-SP1F</u> | <u>407 - 385</u>   | (-) |
| <b>Il12b</b> , GXL_97158, GeneID: 64546, Rattus norvegicus chr. 10                                                                                                                                          | <u>EGRF-SP1F</u> | <u>235 - 255</u>   | (+) |
|                                                                                                                                                                                                             | <u>EGRF-SP1F</u> | <u>488 - 466</u>   | (-) |
|                                                                                                                                                                                                             | <u>EGRF-SP1F</u> | <u>499 - 476</u>   | (-) |
|                                                                                                                                                                                                             | <u>EGRF-SP1F</u> | <u>276 - 299</u>   | (+) |
|                                                                                                                                                                                                             | <u>EGRF-SP1F</u> | <u>472 - 492</u>   | (+) |



interleukin 12b

|                                                                                                                                                          |                           |                           |     |
|----------------------------------------------------------------------------------------------------------------------------------------------------------|---------------------------|---------------------------|-----|
| <b>GXP_115908</b> [ <a href="#">GXP_115908</a> ] (1 - 970)                                                                                               | <a href="#">EGRF-SP1F</a> | <a href="#">863 - 843</a> | (-) |
| <b>Kcnmb1</b> , GXL_97165, GeneID: 29747, Rattus norvegicus chr. 10<br>potassium large conductance calcium-activated channel, subfamily M, beta member 1 | <a href="#">EGRF-SP1F</a> | <a href="#">869 - 849</a> | (-) |
| <b>GXP_115915</b> [ <a href="#">GXP_115915</a> ] (1 - 896)                                                                                               | <a href="#">EGRF-SP1F</a> | <a href="#">317 - 294</a> | (-) |
| <b>Timp2</b> , GXL_97172, GeneID: 29543, Rattus norvegicus chr. 10<br>tissue inhibitor of metalloproteinase 2                                            | <a href="#">EGRF-SP1F</a> | <a href="#">323 - 299</a> | (-) |
| <b>GXP_115916</b> [ <a href="#">GXP_115916</a> ] (1 - 601)                                                                                               | <a href="#">EGRF-SP1F</a> | <a href="#">226 - 246</a> | (+) |
| <b>Neurod2</b> , GXL_97173, GeneID: 54276, Rattus norvegicus chr. 10<br>neurogenic differentiation 2                                                     | <a href="#">EGRF-SP1F</a> | <a href="#">430 - 410</a> | (-) |
| <b>GXP_115928</b> [ <a href="#">GXP_115928</a> ] (1 - 851)                                                                                               | <a href="#">EGRF-SP1F</a> | <a href="#">360 - 383</a> | (+) |
| <b>Axin1</b> , GXL_97185, GeneID: 79257, Rattus norvegicus chr. 10<br>axin 1                                                                             | <a href="#">EGRF-SP1F</a> | <a href="#">186 - 209</a> | (+) |
| <b>GXP_1402311</b> [ <a href="#">GXP_1402311</a> ] (1 - 606)                                                                                             | <a href="#">EGRF-SP1F</a> | <a href="#">329 - 353</a> | (+) |
| <b>Tmem8 predicted</b> , GXL_97192, GeneID: 303004, Rattus norvegicus chr. 10<br>transmembrane protein 8 (five membrane-spanning domains) (predicted)    | <a href="#">EGRF-SP1F</a> | <a href="#">219 - 197</a> | (-) |
| <b>GXP_1402313</b> [ <a href="#">GXP_1402313</a> ] (1 - 602)                                                                                             | <a href="#">EGRF-SP1F</a> | <a href="#">522 - 500</a> | (-) |
| <b>Tmem8 predicted</b> , GXL_97192, GeneID: 303004, Rattus norvegicus chr. 10<br>transmembrane protein 8 (five membrane-spanning domains) (predicted)    | <a href="#">EGRF-SP1F</a> | <a href="#">837 - 859</a> | (+) |
| <b>GXP_115938</b> [ <a href="#">GXP_115938</a> ] (1 - 601)                                                                                               | <a href="#">EGRF-SP1F</a> | <a href="#">853 - 875</a> | (+) |
| <b>Prr3</b> , GXL_97195, GeneID: 442921, Rattus norvegicus chr. 10<br>protamine 3                                                                        | <a href="#">EGRF-SP1F</a> | <a href="#">742 - 720</a> | (-) |
| <b>GXP_115941</b> [ <a href="#">GXP_115941</a> ] (1 - 1044)                                                                                              | <a href="#">EGRF-SP1F</a> | <a href="#">454 - 474</a> | (+) |
| <b>Cygb</b> , GXL_97198, GeneID: 170520, Rattus norvegicus chr. 10<br>cytoglobin                                                                         | <a href="#">EGRF-SP1F</a> | <a href="#">130 - 107</a> | (-) |
| <b>GXP_115960</b> [ <a href="#">GXP_115960</a> ] (1 - 881)                                                                                               | <a href="#">EGRF-SP1F</a> | <a href="#">843 - 823</a> | (-) |
| <b>Cacng4</b> , GXL_97217, GeneID: 140725, Rattus norvegicus chr. 10<br>calcium channel, voltage-dependent, gamma subunit 4                              | <a href="#">EGRF-SP1F</a> | <a href="#">310 - 333</a> | (+) |
| <b>GXP_1403228</b> [ <a href="#">GXP_1403228</a> ] (1 - 602)                                                                                             |                           |                           |     |
| <b>Dnajc7</b> , GXL_97248, GeneID: 303536, Rattus norvegicus chr. 10<br>DnaJ (Hsp40) homolog, subfamily C, member 7                                      |                           |                           |     |
| <b>GXP_115992</b> [ <a href="#">GXP_115992</a> ] (1 - 818)                                                                                               |                           |                           |     |
| <b>Sfrs2</b> , GXL_97249, GeneID: 494445, Rattus norvegicus chr. 10<br>similar to splicing factor, arginine/serine-rich 2                                |                           |                           |     |
| <b>GXP_116006</b> [ <a href="#">GXP_116006</a> ] (1 - 858)                                                                                               |                           |                           |     |
| <b>Snx11</b> , GXL_97263, GeneID: 303493, Rattus norvegicus chr. 10<br>sorting nexin 11                                                                  |                           |                           |     |
| <b>GXP_1403327</b> [ <a href="#">GXP_1403327</a> ] (1 - 694)                                                                                             |                           |                           |     |
| <b>Arhgap27</b> , GXL_97280, GeneID: 303583, Rattus norvegicus chr. 10<br>Rho GTPase activating protein 27                                               |                           |                           |     |

|                                                                                                                                                                           |                  |                  |     |
|---------------------------------------------------------------------------------------------------------------------------------------------------------------------------|------------------|------------------|-----|
| <b>GXP_116034</b> [ <a href="#">GXP_116034</a> ] (1 - 674)                                                                                                                | <u>EGRF-SP1F</u> | <u>480 - 503</u> | (+) |
| <b>Scpep1</b> , GXL_97290, GeneID: 114861, Rattus norvegicus chr. 10<br>serine carboxypeptidase 1                                                                         | <u>EGRF-SP1F</u> | <u>491 - 514</u> | (+) |
| <b>GXP_116057</b> [ <a href="#">GXP_116057</a> ] (1 - 643)                                                                                                                | <u>EGRF-SP1F</u> | <u>265 - 289</u> | (+) |
| <b>Sost</b> , GXL_97313, GeneID: 80722, Rattus norvegicus chr. 10<br>sclerostin                                                                                           | <u>EGRF-SP1F</u> | <u>483 - 507</u> | (+) |
| <b>GXP_116064</b> [ <a href="#">GXP_116064</a> ] (1 - 709)                                                                                                                | <u>EGRF-SP1F</u> | <u>157 - 135</u> | (-) |
| <b>Prm2</b> , GXL_97320, GeneID: 25345, Rattus norvegicus chr. 10<br>protamine 2                                                                                          | <u>EGRF-SP1F</u> | <u>323 - 300</u> | (-) |
| <b>GXP_116066</b> [ <a href="#">GXP_116066</a> ] (1 - 956)                                                                                                                | <u>EGRF-SP1F</u> | <u>329 - 305</u> | (-) |
| <b>Cltc</b> , GXL_97322, GeneID: 54241, Rattus norvegicus chr. 10<br>clathrin, heavy polypeptide (Hc)                                                                     | <u>EGRF-SP1F</u> | <u>340 - 317</u> | (-) |
| <b>GXP_116071</b> [ <a href="#">GXP_116071</a> ] (1 - 601)                                                                                                                | <u>EGRF-SP1F</u> | <u>370 - 349</u> | (-) |
| <b>Cacnb1</b> , GXL_97327, GeneID: 50688, Rattus norvegicus chr. 10<br>calcium channel, voltage-dependent, beta 1 subunit                                                 | <u>EGRF-SP1F</u> | <u>291 - 268</u> | (-) |
| <b>GXP_116101</b> [ <a href="#">GXP_116101</a> ] (1 - 601)                                                                                                                | <u>EGRF-SP1F</u> | <u>496 - 473</u> | (-) |
| <b>Abca5</b> , GXL_97357, GeneID: 286970, Rattus norvegicus chr. 10<br>ATP-binding cassette, sub-family A (ABC1), member 5                                                | <u>EGRF-SP1F</u> | <u>102 - 82</u>  | (-) |
| <b>GXP_1403423</b> [ <a href="#">GXP_1403423</a> ] (1 - 699)                                                                                                              | <u>EGRF-SP1F</u> | <u>515 - 535</u> | (+) |
| <b>Abca5</b> , GXL_97357, GeneID: 286970, Rattus norvegicus chr. 10<br>ATP-binding cassette, sub-family A (ABC1), member 5                                                | <u>EGRF-SP1F</u> | <u>206 - 226</u> | (+) |
| <b>GXP_1403370</b> [ <a href="#">GXP_1403370</a> ] (1 - 762)                                                                                                              | <u>EGRF-SP1F</u> | <u>14 - 36</u>   | (+) |
| <b>Smarcd2</b> , GXL_97365, GeneID: 83833, Rattus norvegicus chr. 10<br>SWI/SNF related, matrix associated, actin dependent regulator of chromatin, subfamily d, member 2 | <u>EGRF-SP1F</u> | <u>436 - 414</u> | (-) |
| <b>GXP_1146883</b> [ <a href="#">GXP_1146883</a> ] (1 - 650)                                                                                                              | <u>EGRF-SP1F</u> | <u>440 - 418</u> | (-) |
| <b>Emp2</b> , GXL_97367, GeneID: 360468, Rattus norvegicus chr. 10<br>epithelial membrane protein 2                                                                       | <u>EGRF-SP1F</u> | <u>453 - 431</u> | (-) |
| <b>GXP_116130</b> [ <a href="#">GXP_116130</a> ] (1 - 846)                                                                                                                | <u>EGRF-SP1F</u> | <u>558 - 578</u> | (+) |
| <b>Zfp403</b> , GXL_97386, GeneID: 360584, Rattus norvegicus chr. 10<br>zinc finger protein 403                                                                           | <u>EGRF-SP1F</u> | <u>517 - 541</u> | (+) |
| <b>GXP_1402974</b> [ <a href="#">GXP_1402974</a> ] (1 - 683)                                                                                                              | <u>EGRF-SP1F</u> | <u>591 - 613</u> | (+) |
| <b>Zfp403</b> , GXL_97386, GeneID: 360584, Rattus norvegicus chr. 10<br>zinc finger protein 403                                                                           | <u>EGRF-SP1F</u> | <u>345 - 323</u> | (-) |
| <b>GXP_116162</b> [ <a href="#">GXP_116162</a> ] (1 - 601)                                                                                                                |                  |                  |     |
| <b>Grb2</b> , GXL_97418, GeneID: 81504, Rattus norvegicus chr. 10<br>growth factor receptor bound protein 2                                                               |                  |                  |     |

|                                                                                                                                                                                                             |                  |                    |     |
|-------------------------------------------------------------------------------------------------------------------------------------------------------------------------------------------------------------|------------------|--------------------|-----|
| <b>GXP_1403481</b> [ <a href="#">GXP_1403481</a> ] (1 - 601)<br><b>Grb2</b> , GXL_97418, GeneID: 81504, Rattus norvegicus chr. 10<br>growth factor receptor bound protein 2                                 | <u>EGRF-SP1F</u> | <u>300 - 280</u>   | (-) |
| <b>GXP_116168</b> [ <a href="#">GXP_116168</a> ] (1 - 649)<br><b>Mafg</b> , GXL_97424, GeneID: 64188, Rattus norvegicus chr. 10<br>v-maf musculoaponeurotic fibrosarcoma oncogene family, protein G (avian) | <u>EGRF-SP1F</u> | <u>69 - 47</u>     | (-) |
| <b>GXP_116174</b> [ <a href="#">GXP_116174</a> ] (1 - 959)<br><b>Hcrt</b> , GXL_97430, GeneID: 25723, Rattus norvegicus chr. 10<br>hypocretin                                                               | <u>EGRF-SP1F</u> | <u>72 - 52</u>     | (-) |
| <b>GXP_116179</b> [ <a href="#">GXP_116179</a> ] (1 - 601)<br><b>Ubf</b> , GXL_97435, GeneID: 25574, Rattus norvegicus chr. 10<br>upstream binding transcription factor, RNA polymerase I                   | <u>EGRF-SP1F</u> | <u>703 - 723</u>   | (+) |
| <b>GXP_1148410</b> [ <a href="#">GXP_1148410</a> ] (1 - 1302)<br><b>Ubf</b> , GXL_97435, GeneID: 25574, Rattus norvegicus chr. 10<br>upstream binding transcription factor, RNA polymerase I                | <u>EGRF-SP1F</u> | <u>578 - 557</u>   | (-) |
| <b>GXP_1148413</b> [ <a href="#">GXP_1148413</a> ] (1 - 899)<br><b>Ubf</b> , GXL_97435, GeneID: 25574, Rattus norvegicus chr. 10<br>upstream binding transcription factor, RNA polymerase I                 | <u>EGRF-SP1F</u> | <u>542 - 563</u>   | (+) |
| <b>GXP_1148414</b> [ <a href="#">GXP_1148414</a> ] (1 - 601)<br><b>Ubf</b> , GXL_97435, GeneID: 25574, Rattus norvegicus chr. 10<br>upstream binding transcription factor, RNA polymerase I                 | <u>EGRF-SP1F</u> | <u>548 - 568</u>   | (+) |
| <b>GXP_116197</b> [ <a href="#">GXP_116197</a> ] (1 - 1476)<br><b>Kpnb1</b> , GXL_97453, GeneID: 24917, Rattus norvegicus chr. 10<br>karyopherin (importin) beta 1                                          | <u>EGRF-SP1F</u> | <u>75 - 54</u>     | (-) |
| <b>GXP_116227</b> [ <a href="#">GXP_116227</a> ] (1 - 1085)<br><b>Nptx1</b> , GXL_97482, GeneID: 266777, Rattus norvegicus chr. 10<br>neuronal pentraxin 1                                                  | <u>EGRF-SP1F</u> | <u>170 - 190</u>   | (+) |
| <b>GXP_116233</b> [ <a href="#">GXP_116233</a> ] (1 - 936)<br><b>Nxph3</b> , GXL_97488, GeneID: 59315, Rattus norvegicus chr. 10<br>neurexophilin 3                                                         | <u>EGRF-SP1F</u> | <u>339 - 318</u>   | (-) |
| <b>GXP_116235</b> [ <a href="#">GXP_116235</a> ] (1 - 918)<br><b>Npepps</b> , GXL_97490, GeneID: 50558, Rattus norvegicus chr. 10<br>aminopeptidase puromycin sensitive                                     | <u>EGRF-SP1F</u> | <u>730 - 750</u>   | (+) |
| <b>GXP_116248</b> [ <a href="#">GXP_116248</a> ] (1 - 729)<br><b>Snip</b> , GXL_97503, GeneID: 56029, Rattus norvegicus chr. 10<br>SNAP25-interacting protein                                               | <u>EGRF-SP1F</u> | <u>732 - 755</u>   | (+) |
|                                                                                                                                                                                                             | <u>EGRF-SP1F</u> | <u>737 - 760</u>   | (+) |
|                                                                                                                                                                                                             | <u>EGRF-SP1F</u> | <u>954 - 932</u>   | (-) |
|                                                                                                                                                                                                             | <u>EGRF-SP1F</u> | <u>1165 - 1185</u> | (+) |
|                                                                                                                                                                                                             | <u>EGRF-SP1F</u> | <u>390 - 366</u>   | (-) |
|                                                                                                                                                                                                             | <u>EGRF-SP1F</u> | <u>461 - 441</u>   | (-) |
|                                                                                                                                                                                                             | <u>EGRF-SP1F</u> | <u>682 - 661</u>   | (-) |
|                                                                                                                                                                                                             | <u>EGRF-SP1F</u> | <u>808 - 787</u>   | (-) |
|                                                                                                                                                                                                             | <u>EGRF-SP1F</u> | <u>453 - 474</u>   | (+) |
|                                                                                                                                                                                                             | <u>EGRF-SP1F</u> | <u>462 - 484</u>   | (+) |
|                                                                                                                                                                                                             | <u>EGRF-SP1F</u> | <u>638 - 662</u>   | (+) |
|                                                                                                                                                                                                             | <u>EGRF-SP1F</u> | <u>430 - 408</u>   | (-) |
|                                                                                                                                                                                                             | <u>EGRF-SP1F</u> | <u>444 - 464</u>   | (+) |

|                                                                                                                                                                                                                                  |                  |                    |     |
|----------------------------------------------------------------------------------------------------------------------------------------------------------------------------------------------------------------------------------|------------------|--------------------|-----|
| <b>GXP_1403150</b> [ <a href="#">GXP_1403150</a> ] (1 - 601)<br><b>Snip</b> , GXL_97503, GeneID: 56029, Rattus norvegicus chr. 10<br>SNAP25-interacting protein                                                                  | <u>EGRF-SP1F</u> | <u>344 - 322</u>   | (-) |
| <b>GXP_116249</b> [ <a href="#">GXP_116249</a> ] (1 - 1210)<br><b>Rpl23</b> , GXL_97504, GeneID: 29282, Rattus norvegicus chr. 10<br>ribosomal protein L23                                                                       | <u>EGRF-SP1F</u> | <u>849 - 825</u>   | (-) |
| <b>GXP_1403161</b> [ <a href="#">GXP_1403161</a> ] (1 - 602)<br><b>Rpl23</b> , GXL_97504, GeneID: 29282, Rattus norvegicus chr. 10<br>ribosomal protein L23                                                                      | <u>EGRF-SP1F</u> | <u>597 - 573</u>   | (-) |
| <b>GXP_116253</b> [ <a href="#">GXP_116253</a> ] (1 - 1087)<br><b>Cacna1g</b> , GXL_97508, GeneID: 29717, Rattus norvegicus chr. 10<br>calcium channel, voltage-dependent, T type, alpha 1G subunit                              | <u>EGRF-SP1F</u> | <u>353 - 377</u>   | (+) |
|                                                                                                                                                                                                                                  | <u>EGRF-SP1F</u> | <u>476 - 496</u>   | (+) |
|                                                                                                                                                                                                                                  | <u>EGRF-SP1F</u> | <u>480 - 502</u>   | (+) |
|                                                                                                                                                                                                                                  | <u>EGRF-SP1F</u> | <u>148 - 169</u>   | (+) |
| <b>GXP_116256</b> [ <a href="#">GXP_116256</a> ] (1 - 602)<br><b>Grin2a</b> , GXL_97511, GeneID: 24409, Rattus norvegicus chr. 10<br>glutamate receptor, ionotropic, N-methyl D-aspartate 2A                                     | <u>EGRF-SP1F</u> | <u>150 - 171</u>   | (+) |
| <b>GXP_116262</b> [ <a href="#">GXP_116262</a> ] (1 - 886)<br><b>Atp5g1</b> , GXL_97517, GeneID: 29754, Rattus norvegicus chr. 10<br>ATP synthase, H+ transporting, mitochondrial F0 complex, subunit c (subunit 9), isoform 1   | <u>EGRF-SP1F</u> | <u>828 - 808</u>   | (-) |
| <b>GXP_1148172</b> [ <a href="#">GXP_1148172</a> ] (1 - 601)<br><b>Atp5g1</b> , GXL_97517, GeneID: 29754, Rattus norvegicus chr. 10<br>ATP synthase, H+ transporting, mitochondrial F0 complex, subunit c (subunit 9), isoform 1 | <u>EGRF-SP1F</u> | <u>511 - 487</u>   | (-) |
| <b>GXP_1403113</b> [ <a href="#">GXP_1403113</a> ] (1 - 655)<br><b>Atp5g1</b> , GXL_97517, GeneID: 29754, Rattus norvegicus chr. 10<br>ATP synthase, H+ transporting, mitochondrial F0 complex, subunit c (subunit 9), isoform 1 | <u>EGRF-SP1F</u> | <u>34 - 14</u>     | (-) |
| <b>GXP_116265</b> [ <a href="#">GXP_116265</a> ] (1 - 981)<br><b>Igf2bp1</b> , GXL_97520, GeneID: 303477, Rattus norvegicus chr. 10<br>insulin-like growth factor 2, binding protein 1                                           | <u>EGRF-SP1F</u> | <u>286 - 263</u>   | (-) |
|                                                                                                                                                                                                                                  | <u>EGRF-SP1F</u> | <u>815 - 837</u>   | (+) |
| <b>GXP_1403225</b> [ <a href="#">GXP_1403225</a> ] (1 - 619)<br><b>Acly</b> , GXL_97531, GeneID: 24159, Rattus norvegicus chr. 10<br>ATP citrate lyase                                                                           | <u>EGRF-SP1F</u> | <u>71 - 91</u>     | (+) |
| <b>GXP_1402365</b> [ <a href="#">GXP_1402365</a> ] (1 - 602)<br><b>Gabrb2</b> , GXL_97537, GeneID: 25451, Rattus norvegicus chr. 10<br>gamma-aminobutyric acid (GABA-A) receptor, subunit beta 2                                 | <u>EGRF-SP1F</u> | <u>428 - 451</u>   | (+) |
| <b>GXP_116285</b> [ <a href="#">GXP_116285</a> ] (1 - 1258)<br><b>H3f3b</b> , GXL_97540, GeneID: 117056, Rattus norvegicus chr. 10<br>H3 histone, family 3B                                                                      | <u>EGRF-SP1F</u> | <u>1062 - 1040</u> | (-) |
|                                                                                                                                                                                                                                  | <u>EGRF-SP1F</u> | <u>1070 - 1046</u> | (-) |
| <b>GXP_116301</b> [ <a href="#">GXP_116301</a> ] (1 - 601)<br><b>Mgat1</b> , GXL_97556, GeneID: 81519, Rattus norvegicus chr. 10<br>mannoside acetylglucosaminyltransferase 1                                                    | <u>EGRF-SP1F</u> | <u>490 - 468</u>   | (-) |
|                                                                                                                                                                                                                                  | <u>EGRF-SP1F</u> | <u>455 - 435</u>   | (-) |

|                                                                                                                                                                                                           |                           |                             |     |
|-----------------------------------------------------------------------------------------------------------------------------------------------------------------------------------------------------------|---------------------------|-----------------------------|-----|
| <b>GXP_116313</b> [ <a href="#">GXP_116313</a> ] (1 - 757)<br><b>Krt25d</b> , GXL_97568, GeneID: 360623, Rattus norvegicus chr. 10<br>keratin 25D                                                         |                           |                             |     |
| <b>GXP_1402247</b> [ <a href="#">GXP_1402247</a> ] (1 - 696)<br><b>Rnps1</b> , GXL_97579, GeneID: 287113, Rattus norvegicus chr. 10<br>ribonucleic acid binding protein S1                                | <a href="#">EGRF-SP1F</a> | <a href="#">35 - 12</a>     | (-) |
| <b>GXP_116339</b> [ <a href="#">GXP_116339</a> ] (1 - 1464)<br><b>Pip5k2b</b> , GXL_97594, GeneID: 89812, Rattus norvegicus chr. 10<br>phosphatidylinositol-4-phosphate 5-kinase, type II, beta           | <a href="#">EGRF-SP1F</a> | <a href="#">1176 - 1154</a> | (-) |
| <b>GXP_116340</b> [ <a href="#">GXP_116340</a> ] (1 - 684)<br><b>Clcn7</b> , GXL_97595, GeneID: 29233, Rattus norvegicus chr. 10<br>chloride channel 7                                                    | <a href="#">EGRF-SP1F</a> | <a href="#">1337 - 1361</a> | (+) |
| <b>GXP_116344</b> [ <a href="#">GXP_116344</a> ] (1 - 937)<br><b>Kcnh4</b> , GXL_97599, GeneID: 114032, Rattus norvegicus chr. 10<br>potassium voltage-gated channel, subfamily H (eag-related), member 4 | <a href="#">EGRF-SP1F</a> | <a href="#">48 - 68</a>     | (+) |
| <b>GXP_116346</b> [ <a href="#">GXP_116346</a> ] (1 - 707)<br><b>Lkap</b> , GXL_97601, GeneID: 170946, Rattus norvegicus chr. 10<br>limkain b1                                                            | <a href="#">EGRF-SP1F</a> | <a href="#">108 - 130</a>   | (+) |
| <b>GXP_116367</b> [ <a href="#">GXP_116367</a> ] (1 - 690)<br><b>Pctp</b> , GXL_97622, GeneID: 29510, Rattus norvegicus chr. 10<br>phosphatidylcholine transfer protein                                   | <a href="#">EGRF-SP1F</a> | <a href="#">651 - 628</a>   | (-) |
| <b>GXP_116375</b> [ <a href="#">GXP_116375</a> ] (1 - 880)<br><b>Mrpl38</b> , GXL_97630, GeneID: 303685, Rattus norvegicus chr. 10<br>mitochondrial ribosomal protein L38                                 | <a href="#">EGRF-SP1F</a> | <a href="#">654 - 633</a>   | (-) |
|                                                                                                                                                                                                           | <a href="#">EGRF-SP1F</a> | <a href="#">314 - 291</a>   | (-) |
|                                                                                                                                                                                                           | <a href="#">EGRF-SP1F</a> | <a href="#">513 - 491</a>   | (-) |
|                                                                                                                                                                                                           | <a href="#">EGRF-SP1F</a> | <a href="#">604 - 584</a>   | (-) |
|                                                                                                                                                                                                           | <a href="#">EGRF-SP1F</a> | <a href="#">608 - 586</a>   | (-) |
|                                                                                                                                                                                                           | <a href="#">EGRF-SP1F</a> | <a href="#">440 - 463</a>   | (+) |
|                                                                                                                                                                                                           | <a href="#">EGRF-SP1F</a> | <a href="#">504 - 482</a>   | (-) |
|                                                                                                                                                                                                           | <a href="#">EGRF-SP1F</a> | <a href="#">509 - 487</a>   | (-) |

**Analysis terminated because more than 1000 matches were found.**

**A total of 1264 matches (1000 non-redundant matches) was found in 659 sequences.**

**Sequences searched: 4615 (3096183 bp).**

## Evaluation of results

**Model: EGRF-SP1F**

Number of input genes: 553

## GO category "biological\_process"

Number of genes annotated in GO: 426

Number of significant GO groups found: 90

| GO group                      | p-value     | # genes (observed) | # genes (expected) | list of genes                                                                                                                                                                                                                                                                                                                                                                                                                                                                                                                                                                                                                                                                                                                                                                                                                                                                                                                                                                                                                                                      | GeneIDs                                                                                                                                                                                                                                                                                                                                                                                                                                                                                                                                                                                                                                                                                                                                                                                                                                                                                                                                                                                                                                                                                                                                                                                                                                                                                                           |
|-------------------------------|-------------|--------------------|--------------------|--------------------------------------------------------------------------------------------------------------------------------------------------------------------------------------------------------------------------------------------------------------------------------------------------------------------------------------------------------------------------------------------------------------------------------------------------------------------------------------------------------------------------------------------------------------------------------------------------------------------------------------------------------------------------------------------------------------------------------------------------------------------------------------------------------------------------------------------------------------------------------------------------------------------------------------------------------------------------------------------------------------------------------------------------------------------|-------------------------------------------------------------------------------------------------------------------------------------------------------------------------------------------------------------------------------------------------------------------------------------------------------------------------------------------------------------------------------------------------------------------------------------------------------------------------------------------------------------------------------------------------------------------------------------------------------------------------------------------------------------------------------------------------------------------------------------------------------------------------------------------------------------------------------------------------------------------------------------------------------------------------------------------------------------------------------------------------------------------------------------------------------------------------------------------------------------------------------------------------------------------------------------------------------------------------------------------------------------------------------------------------------------------|
| localization                  | 2.74207e-09 | 138                | 87.45              | Arrb1, Ap2a2, Cd81, Picalm, Slc28a1, Abhd2_predicted, Pde3b, Doc2a, Gab2, Fgf15, Cdw92, Rab2, Sdcbp, Faf1, Clta, Kif1b, Clcnk1, Pdpn, Unc13b, Nrcam, Slc5a6, Foxg1, Npy, Cav2, Zfp384, Arf5, Met, Syn2, Kcnh2, Akap3, Cxcl12, Reln, Slc6a11, Slc4a5, Abp1, Crabp2, Ppp3ca, Accn5, Tspan2, Syt6, Pitx2, Unc5c, Kcnd3, Plcg1, Slc32a1, Src, Arfgef2, Dnmt3b, Psap, Cd24, Gja1, Gyltl1b, Atp5g3, Kcnh7, Cacnb4, Arl5a, Grin1, Cacna1b, Stxbp1, Slc34a3, Acvr1, Tra1_predicted, Hcn2, Ywhaz, Fstl3, Dgat1, Kcnq3, Rab21, Ascl1, Capzb, Slc2a5, Rims3, Nppb, Grik3, Atp2a2, Dynll1, Erp29, Ptpn11, Trpv4, Vps33a, Alcam, Slc12a8, Gsk3b, Clcn2, Ap2m1, Clic6, Kcne1, Cd47, Lphn1, Cd97, Bcar1, Gnao, Vps4a, Pou4f2, Glg1, Mbtps1, Slc7a5, Tomm20, Bcap31, Cacna1f, Gdi1, Tsc22d3, L1cam, Slc7a3, Atp6ap1, Slc38a5, Slc25a1, Dnai2, Slc16a6, Vegfc, Myo9b, Cacna2d3, Arf4, Slc27a1, Vps36_predicted, Rab3a, Edn1, Kif27, Bcd2, Inhba, Exoc2, Kcnmb1, Cygb, Cacng4, Arhgap27, Cltc, Cacnb1, Abca5, Hcrt, Kpnb1, Nptx1, Snip, Rpl23, Cacna1g, Igf2bp1, Gabrb2, Kcnh4, Pctp | 25387, 81637, 25621, 89816, 116642, 293050, 29516, 65031, 84477, 170582, 85254, 65158, 83841, 140657, 83800, 117548, 79425, 54320, 64830, 497815, 170551, 24370, 24604, 363425, 171018, 79117, 24553, 29179, 117018, 312720, 24772, 24718, 79213, 297386, 65029, 29563, 24674, 63866, 64521, 60565, 54284, 362049, 65195, 25738, 83612, 83805, 296380, 444985, 25524, 25145, 24392, 311202, 114630, 170739, 58942, 117050, 24408, 257648, 25558, 246234, 79558, 362862, 114244, 25578, 114031, 84497, 29682, 299799, 64186, 298584, 65197, 65025, 25105, 298521, 29693, 58945, 117030, 25622, 66026, 65081, 79559, 266733, 84027, 29232, 116563, 304081, 25471, 29364, 65096, 361383, 25414, 50664, 246772, 171355, 29476, 89842, 50719, 266601, 293852, 114493, 25183, 83514, 50687, 29485, 83615, 192208, 29743, 360654, 303772, 114111, 25486, 306243, 79120, 94172, 290851, 25531, 24323, 246209, 306809, 29200, 171455, 29747, 170520, 140725, 303583, 54241, 50688, 286970, 25723, 24917, 266777, 56029, 29282, 29717, 303477, 25451, 114032, 29510, 25718, 29431, 497815, 24370, 24772, 24718, 85247, 362049, 192352, 24392, 25558, 311169, 56761, 84607, 64186, 25585, 25622, 24547, 79559, 25666, 288280, 113912, 50664, 171355, 50687, 266711, 79114, 25402, 245980, 29410, 291023, 81653, 29543, 54276 |
| neuron differentiation        | 2.11756e-07 | 34                 | 12.96              | Igf1r, Pak1, Nrcam, Foxg1, Cxcl12, Reln, S100a6, Unc5c, Ss181l, Gja1, Stxbp1, Rtn4rl2, Notch3, Socs2, Ascl1, Id3, Ptpn11, Mbp, Alcam, Dgkg, Ncam2, Rtn4r, Gnao, Pou4f2, L1cam, Lzts1, Fgfr1, Casp3, Nr2f6, Neurod3, Id4, Dbn1, Timp2, Neurod2                                                                                                                                                                                                                                                                                                                                                                                                                                                                                                                                                                                                                                                                                                                                                                                                                      | 25387, 81637, 89816, 116642, 29516, 65031, 85254, 65158, 83841, 140657, 83800, 117548, 79425, 64830, 117051, 24604, 363425, 171018, 79117, 29179, 117018, 79213, 297386, 65029, 29563, 24674, 63866, 60565, 65195, 25738, 83612, 83805, 296380, 25524, 25145, 24392, 311202, 114630, 170739, 58942, 117050, 24408, 257648, 25558, 246234, 362862, 114244, 25578, 114031, 84497, 29682, 299799, 65197, 65025, 25105, 298521, 29693, 58945, 117030, 25622, 66026, 65081, 266733, 84027, 29232, 116563, 304081, 25471, 29364, 65096, 246772, 29476, 89842, 50719, 266601, 293852,                                                                                                                                                                                                                                                                                                                                                                                                                                                                                                                                                                                                                                                                                                                                    |
| establishment of localization | 4.25185e-07 | 112                | 72.18              | Arrb1, Ap2a2, Picalm, Slc28a1, Pde3b, Doc2a, Cdw92, Rab2, Sdcbp, Faf1, Clta, Kif1b, Clcnk1, Unc13b, Slc5a6, Npy, Cav2, Zfp384, Arf5, Syn2, Kcnh2, Slc6a11, Slc4a5, Abp1, Crabp2, Ppp3ca, Accn5, Syt6, Kcnd3, Plcg1, Slc32a1, Src, Arfgef2, Psap, Cd24, Gja1, Gyltl1b, Atp5g3, Kcnh7, Cacnb4, Arl5a, Grin1, Cacna1b, Stxbp1, Slc34a3, Tra1_predicted, Hcn2, Ywhaz, Fstl3, Dgat1, Kcnq3, Rab21, Slc2a5, Rims3, Nppb, Grik3, Atp2a2, Dynll1, Erp29, Ptpn11, Trpv4, Vps33a, Slc12a8, Gsk3b, Clcn2, Ap2m1, Clic6, Kcne1, Cd47, Lphn1, Vps4a, Glg1, Mbtps1, Slc7a5, Tomm20, Bcap31, Cacna1f, Gdi1, Tsc22d3, Slc7a3, Atp6ap1, Slc38a5, Slc25a1, Slc16a6, Vegfc, Myo9b, Cacna2d3, Arf4,                                                                                                                                                                                                                                                                                                                                                                                    | 25387, 81637, 89816, 116642, 29516, 65031, 85254, 65158, 83841, 140657, 83800, 117548, 79425, 64830, 117051, 24604, 363425, 171018, 79117, 29179, 117018, 79213, 297386, 65029, 29563, 24674, 63866, 60565, 65195, 25738, 83612, 83805, 296380, 25524, 25145, 24392, 311202, 114630, 170739, 58942, 117050, 24408, 257648, 25558, 246234, 362862, 114244, 25578, 114031, 84497, 29682, 299799, 65197, 65025, 25105, 298521, 29693, 58945, 117030, 25622, 66026, 65081, 266733, 84027, 29232, 116563, 304081, 25471, 29364, 65096, 246772, 29476, 89842, 50719, 266601, 293852,                                                                                                                                                                                                                                                                                                                                                                                                                                                                                                                                                                                                                                                                                                                                    |

|                        |             |     |       |                                                                                                                                                                                                                                                                                                                                                                                                                                                                                                                                                                                                                                                                                                                                                                                                                            |                                                                                                                                                                                                                                                                                                                                                                                                                                                                                                                                                                                                                                                                                                                                                                                                               |
|------------------------|-------------|-----|-------|----------------------------------------------------------------------------------------------------------------------------------------------------------------------------------------------------------------------------------------------------------------------------------------------------------------------------------------------------------------------------------------------------------------------------------------------------------------------------------------------------------------------------------------------------------------------------------------------------------------------------------------------------------------------------------------------------------------------------------------------------------------------------------------------------------------------------|---------------------------------------------------------------------------------------------------------------------------------------------------------------------------------------------------------------------------------------------------------------------------------------------------------------------------------------------------------------------------------------------------------------------------------------------------------------------------------------------------------------------------------------------------------------------------------------------------------------------------------------------------------------------------------------------------------------------------------------------------------------------------------------------------------------|
|                        |             |     |       | Slc27a1, Vps36_predicted, Rab3a, Edn1, Kif27, Bicd2, Inhba, Exoc2, Kcnmb1, Cygb, Cacng4, Arhgap27, Cltc, Cacnb1, Abca5, Hcrt, Kpnb1, Nptx1, Snip, Rpl23, Cacna1g, Gabrb2, Kcnh4, Pctp                                                                                                                                                                                                                                                                                                                                                                                                                                                                                                                                                                                                                                      | 114493, 25183, 83514, 29485, 83615, 192208, 29743, 303772, 114111, 25486, 306243, 79120, 94172, 290851, 25531, 24323, 246209, 306809, 29200, 171455, 29747, 170520, 140725, 303583, 54241, 50688, 286970, 25723, 24917, 266777, 56029, 29282, 29717, 25451, 114032, 29510                                                                                                                                                                                                                                                                                                                                                                                                                                                                                                                                     |
| transport              | 1.31818e-06 | 106 | 68.72 | Arrb1, Ap2a2, Picalm, Slc28a1, Pde3b, Doc2a, Cdw92, Rab2, Sdcbp, Faf1, Clta, Kif1b, Unc13b, Slc5a6, Npy, Cav2, Zfp384, Arf5, Syn2, Kcnh2, Slc6a11, Slc4a5, Abp1, Crabbp2, Ppp3ca, Accn5, Syt6, Kcnd3, Plcg1, Slc32a1, Src, Arfgef2, Psap, Cd24, Gja1, Gylt1b, Atp5g3, Kcnh7, Cacnb4, Arl5a, Grin1, Cacna1b, Stxbp1, Slc34a3, Tra1_predicted, Hcn2, Ywhaz, Fstl3, Dgat1, Kcnq3, Rab21, Slc2a5, Rims3, Grik3, Atp2a2, Dynll1, Erp29, Ptpn11, Trpv4, Vps33a, Slc12a8, Gsk3b, Clcn2, Ap2m1, Clic6, Kcne1, Cd47, Lphn1, Vps4a, Glg1, Mbtps1, Slc7a5, Tomm20, Bcap31, Cacna1f, Gdi1, Slc7a3, Atp6ap1, Slc38a5, Slc25a1, Slc16a6, Myo9b, Cacna2d3, Arf4, Slc27a1, Vps36_predicted, Rab3a, Edn1, Kif27, Bicd2, Exoc2, Kcnmb1, Cygb, Cacng4, Arhgap27, Cltc, Cacnb1, Abca5, Hcrt, Kpnb1, Nptx1, Rpl23, Cacna1g, Gabrb2, Kcnh4, Pctp | 25387, 81637, 89816, 116642, 29516, 65031, 85254, 65158, 83841, 140657, 83800, 117548, 64830, 170551, 24604, 363425, 171018, 79117, 29179, 117018, 79213, 297386, 65029, 29563, 24674, 63866, 60565, 65195, 25738, 83612, 83805, 296380, 25524, 25145, 24392, 311202, 114630, 170739, 58942, 117050, 24408, 257648, 25558, 246234, 362862, 114244, 25578, 114031, 84497, 29682, 299799, 65197, 65025, 298521, 29693, 58945, 117030, 25622, 66026, 65081, 266733, 84027, 29232, 116563, 304081, 25471, 29364, 65096, 246772, 29476, 89842, 50719, 266601, 293852, 114493, 25183, 29485, 83615, 192208, 29743, 303772, 25486, 306243, 79120, 94172, 290851, 25531, 24323, 246209, 306809, 171455, 29747, 170520, 140725, 303583, 54241, 50688, 286970, 25723, 24917, 266777, 29282, 29717, 25451, 114032, 29510 |
| generation of neurons  | 1.83036e-06 | 35  | 14.85 | Igf1r, Pak1, Nrcam, Foxg1, Met, Cxcl12, Reln, S100a6, Unc5c, Ss18l1, Gja1, Stxbp1, Rtn4rl2, Notch3, Socs2, Ascl1, Id3, Ptpn11, Mbp, Alcam, Dgkg, Ncam2, Rtn4r, Gnao, Pou4f2, L1cam, Lzts1, Fgfr1, Casp3, Nr2f6, Neurod3, Id4, Dbn1, Timp2, Neurod2                                                                                                                                                                                                                                                                                                                                                                                                                                                                                                                                                                         | 25718, 29431, 497815, 24370, 24553, 24772, 24718, 85247, 362049, 192352, 24392, 25558, 311169, 56761, 84607, 64186, 25585, 25622, 24547, 79559, 25666, 288280, 113912, 50664, 171355, 50687, 266711, 79114, 25402, 245980, 29410, 291023, 81653, 29543, 54276                                                                                                                                                                                                                                                                                                                                                                                                                                                                                                                                                 |
| cell differentiation   | 1.86495e-06 | 94  | 59.22 | Fgf3, Igf1r, Tbx6_predicted, Pak1, Bag3, Mgmt, Fgf15, Faf1, Tmod1, Tnfrsf1b, Unc13b, Nrcam, Foxg1, Chn2, Met, Casp2, Cxcl12, Pparg, Reln, Foxm1, Bcl2l13_predicted, Gclm, S100a10, S100a6, Tspan2, Unc5c, Sep15, Notch2, Tcfap2c, Ss18l1, Src, Gja1, Neurog3, Lcn2, Stxbp1, Rtn4rl2, Acvr1, Dlx2, Aes, Zbtb7a, Cand1, Plec1, Tra1_predicted, Notch3, Socs2, Ascl1, Id3, Pou3f1, Wnt4, Pafah2, Casp9, Diablo, Ptpn11, Vps33a, Lnk, Mbp, Dscr1, Alcam, Dgkg, Ncam2, Gsk3b, Kcne1, Rtn4r, Tradd, Bcar1, Gnao, Pou4f2, Timp1, Sh3kbp1, Birc4, Tsc22d3, L1cam, Axin2, Prkcd, Bmpr1a, Lzts1, Ppp2cb, Fgfr1, Casp3, Sh3md2, Nr2f6, Edn1, Tcfap2a_predicted, Smad5, Barx1_predicted, Neurod3, Inhba, Id4, Dbn1, Timp2, Neurod2, Axin1, Prm2, Mafg                                                                                  | 170633, 25718, 365371, 29431, 293524, 25332, 170582, 140657, 25566, 156767, 64830, 497815, 24370, 84031, 24553, 64314, 24772, 25664, 24718, 58921, 312682, 29739, 81778, 85247, 64521, 362049, 113922, 29492, 362280, 192352, 83805, 24392, 60329, 170496, 25558, 311169, 79558, 296499, 29466, 117107, 117152, 64204, 362862, 56761, 84607, 64186, 25585, 192110, 84426, 313611, 58918, 288753, 25622, 65081, 58838, 24547, 266766, 79559, 25666, 288280, 84027, 25471, 113912, 246756, 25414, 50664, 171355, 116510, 84357, 63879, 83514, 50687, 29134, 170538, 81507, 266711, 24673, 79114, 25402, 306417, 245980, 24323, 306862, 59328, 364680, 29410, 29200, 291023, 81653, 29543, 54276, 79257, 25345, 64188                                                                                            |
| cellular developmental | 1.86495e-06 | 94  | 59.22 | Fgf3, Igf1r, Tbx6_predicted, Pak1, Bag3, Mgmt, Fgf15, Faf1, Tmod1, Tnfrsf1b, Unc13b, Nrcam, Foxg1, Chn2, Met, Casp2,                                                                                                                                                                                                                                                                                                                                                                                                                                                                                                                                                                                                                                                                                                       | 170633, 25718, 365371, 29431, 293524, 25332, 170582, 140657, 25566, 156767, 64830, 497815, 24370, 84031,                                                                                                                                                                                                                                                                                                                                                                                                                                                                                                                                                                                                                                                                                                      |

|                       |             |     |        |                                                                                                                                                                                                                                                                                                                                                                                                                                                                                                                                                                                                                                                                                                                                                                                                                                                                                                                                                                                                                                                                                                                                                              |                                                                                                                                                                                                                                                                                                                                                                                                                                                                                                                                                                                                                                                                                                                                                                                                                                                                                                                                                                                                                                                                                                                          |
|-----------------------|-------------|-----|--------|--------------------------------------------------------------------------------------------------------------------------------------------------------------------------------------------------------------------------------------------------------------------------------------------------------------------------------------------------------------------------------------------------------------------------------------------------------------------------------------------------------------------------------------------------------------------------------------------------------------------------------------------------------------------------------------------------------------------------------------------------------------------------------------------------------------------------------------------------------------------------------------------------------------------------------------------------------------------------------------------------------------------------------------------------------------------------------------------------------------------------------------------------------------|--------------------------------------------------------------------------------------------------------------------------------------------------------------------------------------------------------------------------------------------------------------------------------------------------------------------------------------------------------------------------------------------------------------------------------------------------------------------------------------------------------------------------------------------------------------------------------------------------------------------------------------------------------------------------------------------------------------------------------------------------------------------------------------------------------------------------------------------------------------------------------------------------------------------------------------------------------------------------------------------------------------------------------------------------------------------------------------------------------------------------|
| process               |             |     |        | Cxcl12, Pparg, Reln, Foxm1, Bcl2l13_predicted, Gclm, S100a10, S100a6, Tspan2, Unc5c, Sep15, Notch2, Tcfap2c, Ss18l1, Src, Gja1, Neurog3, Lcn2, Stxbp1, Rtn4rl2, Acvr1, Dlx2, Aes, Zbtb7a, Cand1, Plec1, Tra1_predicted, Notch3, Socs2, Ascl1, Id3, Pou3f1, Wnt4, Pafah2, Casp9, Diablo, Ptpn11, Vps33a, Lnk, Mbp, Dscr1, Alcam, Dgkg, Ncam2, Gsk3b, Kcne1, Rtn4r, Tradd, Bcar1, Gnao, Pou4f2, Timp1, Sh3kbp1, Birc4, Tsc22d3, L1cam, Axin2, Prkcd, Bmpr1a, Lzts1, Ppp2cb, Fgfr1, Casp3, Sh3md2, Nr2f6, Edn1, Tcfap2a_predicted, Smad5, Barx1_predicted, Neurod3, Inhba, Id4, Dbn1, Timp2, Neurod2, Axin1, Prm2, Mafg                                                                                                                                                                                                                                                                                                                                                                                                                                                                                                                                         | 24553, 64314, 24772, 25664, 24718, 58921, 312682, 29739, 81778, 85247, 64521, 362049, 113922, 29492, 362280, 192352, 83805, 24392, 60329, 170496, 25558, 311169, 79558, 296499, 29466, 117107, 117152, 64204, 362862, 56761, 84607, 64186, 25585, 192110, 84426, 313611, 58918, 288753, 25622, 65081, 58838, 24547, 266766, 79559, 25666, 288280, 84027, 25471, 113912, 246756, 25414, 50664, 171355, 116510, 84357, 63879, 83514, 50687, 29134, 170538, 81507, 266711, 24673, 79114, 25402, 306417, 245980, 24323, 306862, 59328, 364680, 29410, 29200, 291023, 81653, 29543, 54276, 79257, 25345, 64188                                                                                                                                                                                                                                                                                                                                                                                                                                                                                                                |
| neurogenesis          | 2.06607e-06 | 37  | 16.24  | Igf1r, Pak1, Nrcam, Foxg1, Met, Cxcl12, Reln, S100a6, Tspan2, Unc5c, Ss18l1, Gja1, Stxbp1, Rtn4rl2, Notch3, Socs2, Ascl1, Id3, Pou3f1, Ptpn11, Mbp, Alcam, Dgkg, Ncam2, Rtn4r, Gnao, Pou4f2, L1cam, Lzts1, Fgfr1, Casp3, Nr2f6, Neurod3, Id4, Dbn1, Timp2, Neurod2                                                                                                                                                                                                                                                                                                                                                                                                                                                                                                                                                                                                                                                                                                                                                                                                                                                                                           | 25718, 29431, 497815, 24370, 24553, 24772, 24718, 85247, 64521, 362049, 192352, 24392, 25558, 311169, 56761, 84607, 64186, 25585, 192110, 25622, 24547, 79559, 25666, 288280, 113912, 50664, 171355, 50687, 266711, 79114, 25402, 245980, 29410, 291023, 81653, 29543, 54276                                                                                                                                                                                                                                                                                                                                                                                                                                                                                                                                                                                                                                                                                                                                                                                                                                             |
| neuron development    | 4.21799e-06 | 26  | 9.73   | Igf1r, Pak1, Nrcam, Foxg1, Cxcl12, Reln, S100a6, Unc5c, Ss18l1, Gja1, Stxbp1, Rtn4rl2, Ptpn11, Mbp, Alcam, Dgkg, Ncam2, Rtn4r, Gnao, Pou4f2, L1cam, Lzts1, Fgfr1, Nr2f6, Dbn1, Neurod2                                                                                                                                                                                                                                                                                                                                                                                                                                                                                                                                                                                                                                                                                                                                                                                                                                                                                                                                                                       | 25718, 29431, 497815, 24370, 24772, 24718, 85247, 362049, 192352, 24392, 25558, 311169, 25622, 24547, 79559, 25666, 288280, 113912, 50664, 171355, 50687, 266711, 79114, 245980, 81653, 54276                                                                                                                                                                                                                                                                                                                                                                                                                                                                                                                                                                                                                                                                                                                                                                                                                                                                                                                            |
| developmental process | 6.09135e-06 | 149 | 108.85 | Fgf3, Pde3b, Igf1r, Mesdc2, Doc2a, Agc1, Tbx6_predicted, Pak1, Bag3, Mgmt, Fgf15, Sdcbp, Faf1, Tmod1, Nr4a3, Tnfrsf1b, Ugcg, Pdpn, Unc13b, Nrcam, Crip2, Rhoj, Cgref1, Foxg1, Yy1, Chn2, Sftpb, Met, Bhlhb2, C1galt1, Casp2, Cxcl12, Pparg, Reln, Ptpn12, Foxm1, Bcl2l13_predicted, Gclm, Crabp2, Lmo4, Pdgfc, S100a10, Pde5a, S100a6, Tspan2, Pitx2, Unc5c, Sep15, Notch2, Plcg1, Tcfap2c, Ss18l1, Src, Cd164, Gja1, Neurog3, Fnbp1, Nfe2l2, Lcn2, Stxbp1, Calcr1, Atf2, Rtn4rl2, Cd44, Acvr1, Dlx2, Aes, Zbtb7a, Matk, Cand1, Cart1, Plec1, Tra1_predicted, Notch3, Dgat1, Socs2, Ascl1, Capzb, Id3, Heyl_predicted, Pou3f1, Wnt4, Pafah2, Nppb, Nppa, Casp9, Dynl1, Diablo, Ptpn11, Vps33a, Lnk, Mbp, Dscr1, Txnrd2, Alcam, Dgkg, Ncam2, Cxadr, Gsk3b, Clcn2, Kcne1, Rtn4r, Tradd, Bcar1, Dok4_predicted, Gnao, Pou4f2, Siah1a, Timp1, Mid1, Sh3kbp1, Birc4, Morf4l2, Rbbp7, Tsc22d3, L1cam, Gpm6b, Dgcr2, Axin2, Vegfc, Prkcd, Bmpr1a, Lzts1, Ppp2cb, Fgfr1, Sncg, Casp3, Mustn1, Sh3md2, Wnt5a, Nr2f6, Edn1, Tcfap2a_predicted, Smad5, Srd5a1, Barx1_predicted, Neurod3, Inhba, Ptch1, Id4, Ninj1, Dbn1, Timp2, Neurod2, Axin1, Sost, Prm2, Mafg, Nptx1 | 170633, 29516, 25718, 308796, 65031, 58968, 365371, 29431, 293524, 25332, 170582, 83841, 140657, 25566, 58853, 156767, 83626, 54320, 64830, 497815, 338401, 299145, 245918, 24370, 24919, 84031, 192155, 24553, 79431, 65044, 64314, 24772, 25664, 24718, 117255, 58921, 312682, 29739, 29563, 362051, 79429, 81778, 171115, 85247, 64521, 54284, 362049, 113922, 29492, 25738, 362280, 192352, 83805, 83689, 24392, 60329, 192348, 83619, 170496, 25558, 25029, 81647, 311169, 25406, 79558, 296499, 29466, 117107, 60450, 117152, 25401, 64204, 362862, 56761, 84497, 84607, 64186, 298584, 25585, 313575, 192110, 84426, 313611, 25105, 24602, 58918, 58945, 288753, 25622, 65081, 58838, 24547, 266766, 50551, 79559, 25666, 288280, 89843, 84027, 29232, 25471, 113912, 246756, 25414, 361364, 50664, 171355, 140941, 116510, 54252, 84357, 63879, 317413, 83712, 83514, 50687, 192179, 360742, 29134, 114111, 170538, 81507, 266711, 24673, 79114, 64347, 25402, 290553, 306417, 64566, 245980, 24323, 306862, 59328, 24950, 364680, 29410, 29200, 89830, 291023, 25338, 81653, 29543, 54276, 79257, 80722, 25345, |



|                                    |             |     |       |                                                                                                                                                                                                                                                                                                                                                                                                                                                                                                                                                                                                                                                                                                                                                                                                                                                                                                  |                                                                                                                                                                                                                                                                                                                                                                                                                                                                                                                                                                                                                                                                                                                                                                                                                                                                                        |
|------------------------------------|-------------|-----|-------|--------------------------------------------------------------------------------------------------------------------------------------------------------------------------------------------------------------------------------------------------------------------------------------------------------------------------------------------------------------------------------------------------------------------------------------------------------------------------------------------------------------------------------------------------------------------------------------------------------------------------------------------------------------------------------------------------------------------------------------------------------------------------------------------------------------------------------------------------------------------------------------------------|----------------------------------------------------------------------------------------------------------------------------------------------------------------------------------------------------------------------------------------------------------------------------------------------------------------------------------------------------------------------------------------------------------------------------------------------------------------------------------------------------------------------------------------------------------------------------------------------------------------------------------------------------------------------------------------------------------------------------------------------------------------------------------------------------------------------------------------------------------------------------------------|
| anatomical structure morphogenesis | 8.2438e-06  | 70  | 41.74 | Fgf3, Igf1r, Tbx6_predicted, Pak1, Sdcbp, Nr4a3, Pdpn, Nrcam, Rhoj, Cgref1, Foxg1, Chn2, Sftpb, C1galt1, Cxcl12, Pparg, Reln, Ptpn12, Foxm1, Crabp2, Lmo4, Pdgfc, S100a10, S100a6, Pitx2, Unc5c, Notch2, Ss18l1, Gja1, Neurog3, Stxbp1, Rtn4rl2, Cd44, Aes, Plec1, Notch3, Socs2, Capzb, Id3, Wnt4, Nppb, Nppa, Dynll1, Ptpn11, Mbp, Alcam, Ncam2, Gsk3b, Kcne1, Rtn4r, Bcar1, Gnao, Pou4f2, Mid1, Morf4l2, L1cam, Dgcr2, Vegfc, Bmpr1a, Lzts1, Ppp2cb, Fgfr1, Mustn1, Wnt5a, Edn1, Barx1_predicted, Neurod3, Ptch1, Dbn1, Mafg                                                                                                                                                                                                                                                                                                                                                                  | 64188, 266777<br>170633, 25718, 365371, 29431, 83841, 58853, 54320, 497815, 299145, 245918, 24370, 84031, 192155, 65044, 24772, 25664, 24718, 117255, 58921, 29563, 362051, 79429, 81778, 85247, 54284, 362049, 29492, 192352, 24392, 60329, 25558, 311169, 25406, 29466, 64204, 56761, 84607, 298584, 25585, 84426, 25105, 24602, 58945, 25622, 24547, 79559, 288280, 84027, 25471, 113912, 25414, 50664, 171355, 54252, 317413, 50687, 360742, 114111, 81507, 266711, 24673, 79114, 290553, 64566, 24323, 364680, 29410, 89830, 81653, 64188                                                                                                                                                                                                                                                                                                                                         |
| cell development                   | 1.12781e-05 | 75  | 46.12 | Igf1r, Pak1, Bag3, Mgmt, Fgf15, Faf1, Tmod1, Tnfrsf1b, Unc13b, Nrcam, Foxg1, Chn2, Met, Casp2, Cxcl12, Reln, Bcl2l13_predicted, Gclm, S100a6, Tspan2, Unc5c, Sep15, Notch2, Ss18l1, Src, Gja1, Lcn2, Stxbp1, Rtn4rl2, Acvr1, Tra1_predicted, Notch3, Socs2, Ascl1, Id3, Pou3f1, Wnt4, Pafah2, Casp9, Diablo, Ptpn11, Mbp, Alcam, Dgkg, Ncam2, Gsk3b, Kcne1, Rtn4r, Tradd, Bcar1, Gnao, Pou4f2, Timp1, Sh3kbp1, Birc4, Tsc22d3, L1cam, Axin2, Prkcd, Lzts1, Ppp2cb, Fgfr1, Casp3, Sh3md2, Nr2f6, Edn1, Tcfap2a_predicted, Neurod3, Inhba, Id4, Dbn1, Timp2, Neurod2, Axin1, Prm2                                                                                                                                                                                                                                                                                                                  | 25718, 29431, 293524, 25332, 170582, 140657, 25566, 156767, 64830, 497815, 24370, 84031, 24553, 64314, 24772, 24718, 312682, 29739, 85247, 64521, 362049, 113922, 29492, 192352, 83805, 24392, 170496, 25558, 311169, 79558, 362862, 56761, 84607, 64186, 25585, 192110, 84426, 313611, 58918, 288753, 25622, 24547, 79559, 25666, 288280, 84027, 25471, 113912, 246756, 25414, 50664, 171355, 116510, 84357, 63879, 83514, 50687, 29134, 170538, 266711, 24673, 79114, 25402, 306417, 245980, 24323, 306862, 29410, 29200, 291023, 81653, 29543, 54276, 79257, 25345                                                                                                                                                                                                                                                                                                                  |
| neurite development                | 1.30937e-05 | 23  | 8.53  | Igf1r, Pak1, Nrcam, Foxg1, Cxcl12, Reln, S100a6, Unc5c, Ss18l1, Gja1, Stxbp1, Rtn4rl2, Ptpn11, Mbp, Alcam, Ncam2, Rtn4r, Gnao, Pou4f2, L1cam, Lzts1, Fgfr1, Dbn1                                                                                                                                                                                                                                                                                                                                                                                                                                                                                                                                                                                                                                                                                                                                 | 25718, 29431, 497815, 24370, 24772, 24718, 85247, 362049, 192352, 24392, 25558, 311169, 25622, 24547, 79559, 288280, 113912, 50664, 171355, 50687, 266711, 79114, 81653                                                                                                                                                                                                                                                                                                                                                                                                                                                                                                                                                                                                                                                                                                                |
| anatomical structure development   | 1.42885e-05 | 117 | 81.87 | Fgf3, Pde3b, Igf1r, Mesdc2, Doc2a, Agc1, Tbx6_predicted, Pak1, Fgf15, Sdcbp, Tmod1, Nr4a3, Ugcg, Pdpn, Nrcam, Crip2, Rhoj, Cgref1, Foxg1, Chn2, Sftpb, Met, Bhlhb2, C1galt1, Cxcl12, Pparg, Reln, Ptpn12, Foxm1, Crabp2, Lmo4, Pdgfc, S100a10, Pde5a, S100a6, Tspan2, Pitx2, Unc5c, Notch2, Ss18l1, Src, Gja1, Neurog3, Fnbp1, Stxbp1, Calcrl, Atf2, Rtn4rl2, Cd44, Acvr1, Dlx2, Aes, Zbtb7a, Matk, Cart1, Plec1, Notch3, Dgat1, Socs2, Ascl1, Capzb, Id3, Heyl_predicted, Pou3f1, Wnt4, Nppb, Nppa, Dynll1, Ptpn11, Vps33a, Lnk, Mbp, Dscr1, Txnrd2, Alcam, Dgkg, Ncam2, Cxadr, Gsk3b, Clcn2, Kcne1, Rtn4r, Bcar1, Dok4_predicted, Gnao, Pou4f2, Mid1, Morf4l2, L1cam, Gpm6b, Dgcr2, Axin2, Vegfc, Bmpr1a, Lzts1, Ppp2cb, Fgfr1, Sncg, Casp3, Mustn1, Wnt5a, Nr2f6, Edn1, Tcfap2a_predicted, Smad5, Barx1_predicted, Neurod3, Inhba, Ptch1, Id4, Ninj1, Dbn1, Timp2, Neurod2, Sost, Mafg, Nptx1 | 170633, 29516, 25718, 308796, 65031, 58968, 365371, 29431, 170582, 83841, 25566, 58853, 83626, 54320, 497815, 338401, 299145, 245918, 24370, 84031, 192155, 24553, 79431, 65044, 24772, 25664, 24718, 117255, 58921, 29563, 362051, 79429, 81778, 171115, 85247, 64521, 54284, 362049, 29492, 192352, 83805, 24392, 60329, 192348, 25558, 25029, 81647, 311169, 25406, 79558, 296499, 29466, 117107, 60450, 25401, 64204, 56761, 84497, 84607, 64186, 298584, 25585, 313575, 192110, 84426, 25105, 24602, 58945, 25622, 65081, 58838, 24547, 266766, 50551, 79559, 25666, 288280, 89843, 84027, 29232, 25471, 113912, 25414, 361364, 50664, 171355, 54252, 317413, 50687, 192179, 360742, 29134, 114111, 81507, 266711, 24673, 79114, 64347, 25402, 290553, 64566, 245980, 24323, 306862, 59328, 364680, 29410, 29200, 89830, 291023, 25338, 81653, 29543, 54276, 80722, 64188, 266777 |

|                                     |             |     |        |                                                                                                                                                                                                                                                                                                                                                                                                                                                                                                                                                                                                                                                                                                                                                                                                                                                                                                                                                                                                                                        |                                                                                                                                                                                                                                                                                                                                                                                                                                                                                                                                                                                                                                                                                                                                                                                                                                                                                                           |
|-------------------------------------|-------------|-----|--------|----------------------------------------------------------------------------------------------------------------------------------------------------------------------------------------------------------------------------------------------------------------------------------------------------------------------------------------------------------------------------------------------------------------------------------------------------------------------------------------------------------------------------------------------------------------------------------------------------------------------------------------------------------------------------------------------------------------------------------------------------------------------------------------------------------------------------------------------------------------------------------------------------------------------------------------------------------------------------------------------------------------------------------------|-----------------------------------------------------------------------------------------------------------------------------------------------------------------------------------------------------------------------------------------------------------------------------------------------------------------------------------------------------------------------------------------------------------------------------------------------------------------------------------------------------------------------------------------------------------------------------------------------------------------------------------------------------------------------------------------------------------------------------------------------------------------------------------------------------------------------------------------------------------------------------------------------------------|
| nervous system development          | 2.01446e-05 | 56  | 31.87  | Igf1r, Doc2a, Agc1, Pak1, Nrcam, Foxg1, Met, Bhlhb2, Cxcl12, Reln, Lmo4, Pde5a, S100a6, Tspan2, Unc5c, Notch2, Ss18l1, Src, Gja1, Fnbp1, Stxbp1, Atf2, Rtn4rl2, Dlx2, Cart1, Notch3, Socs2, Ascl1, Id3, Heyl_predicted, Pou3f1, Ptpn11, Mbp, Dscr1, Alcam, Dgkg, Ncam2, Rtn4r, Dok4_predicted, Gnao, Pou4f2, L1cam, Gpm6b, Lzts1, Fgfr1, Sncg, Casp3, Nr2f6, Neurod3, Inhba, Id4, Ninj1, Dbn1, Timp2, Neurod2, Nptx1                                                                                                                                                                                                                                                                                                                                                                                                                                                                                                                                                                                                                   | 25718, 65031, 58968, 29431, 497815, 24370, 24553, 79431, 24772, 24718, 362051, 171115, 85247, 64521, 362049, 29492, 192352, 83805, 24392, 192348, 25558, 81647, 311169, 296499, 25401, 56761, 84607, 64186, 25585, 313575, 192110, 25622, 24547, 266766, 79559, 25666, 288280, 113912, 361364, 50664, 171355, 50687, 192179, 266711, 79114, 64347, 25402, 245980, 29410, 29200, 291023, 25338, 81653, 29543, 54276, 266777                                                                                                                                                                                                                                                                                                                                                                                                                                                                                |
| cell morphogenesis                  | 2.16899e-05 | 38  | 18.68  | Igf1r, Pak1, Sdcbp, Nrcam, Rhoj, Cgref1, Foxg1, Cxcl12, Reln, S100a10, S100a6, Unc5c, Notch2, Ss18l1, Gja1, Stxbp1, Rtn4rl2, Cd44, Socs2, Capzb, Nppb, Nppa, Dynll1, Ptpn11, Mbp, Alcam, Ncam2, Gsk3b, Rtn4r, Bcar1, Gnao, Pou4f2, Morf4l2, L1cam, Lzts1, Ppp2cb, Fgfr1, Dbn1                                                                                                                                                                                                                                                                                                                                                                                                                                                                                                                                                                                                                                                                                                                                                          | 25718, 29431, 83841, 497815, 299145, 245918, 24370, 24772, 24718, 81778, 85247, 362049, 29492, 192352, 24392, 25558, 311169, 25406, 84607, 298584, 25105, 24602, 58945, 25622, 24547, 79559, 288280, 84027, 113912, 25414, 50664, 171355, 317413, 50687, 266711, 24673, 79114, 81653                                                                                                                                                                                                                                                                                                                                                                                                                                                                                                                                                                                                                      |
| cell-cell signaling                 | 3.0283e-05  | 51  | 28.50  | Fgf3, Pde3b, Doc2a, Sdcbp, Gabrd, Unc13b, Nrcam, Npy, Slc6a1, Cav2, Bhlhb2, Syn2, S100a6, A, Cd24, Gja1, Grin1, Cacna1b, Lynx1_predicted, Hcn2, Dgat1, Kcnq3, Pou3f1, Wnt4, Grik3, Trpv4, Mbp, Fgf12, Lphn1, Cd97, Hsd11b2, Cacna1f, Sh3kbp1, Gabra3, Lzts1, Fgfr1, Wnt5a, Rab3a, Edn1, Srd5a1, Sncb, Barx1_predicted, Inhba, Dbn1, Kcnmb1, Cacng4, Grb2, Hcrt, Nptx1, Grin2a, Gabrb2                                                                                                                                                                                                                                                                                                                                                                                                                                                                                                                                                                                                                                                  | 170633, 29516, 65031, 83841, 29689, 64830, 497815, 24604, 79212, 363425, 79431, 29179, 85247, 24152, 25145, 24392, 24408, 257648, 300018, 114244, 84497, 29682, 192110, 84426, 298521, 66026, 24547, 170630, 65096, 361383, 25117, 114493, 84357, 24947, 266711, 79114, 64566, 25531, 24323, 24950, 113893, 364680, 29200, 81653, 29747, 140725, 81504, 25723, 266777, 24409, 25451                                                                                                                                                                                                                                                                                                                                                                                                                                                                                                                       |
| regulation of developmental process | 3.40856e-05 | 26  | 10.93  | Nrcam, Rhoj, Foxg1, Pparg, S100a10, Notch2, Nfe2l2, Zbtb7a, Notch3, Socs2, Id3, Pou3f1, Wnt4, Dynll1, Vps33a, Mbp, Dscr1, Rtn4r, Axin2, Lzts1, Ppp2cb, Inhba, Id4, Dbn1, Timp2, Mafg                                                                                                                                                                                                                                                                                                                                                                                                                                                                                                                                                                                                                                                                                                                                                                                                                                                   | 497815, 299145, 24370, 25664, 81778, 29492, 83619, 117107, 56761, 84607, 25585, 192110, 84426, 58945, 65081, 24547, 266766, 113912, 29134, 266711, 24673, 29200, 291023, 81653, 29543, 64188                                                                                                                                                                                                                                                                                                                                                                                                                                                                                                                                                                                                                                                                                                              |
| biological regulation               | 4.36921e-05 | 162 | 124.72 | Arrb1, Cd81, Abhd2_predicted, Pde3b, Igf1r, Doc2a, Tbx6_predicted, Bag3, Mgmt, Ncoa2, Rab2, Faf1, Anp32b, Tnfrsf1b, Nfia, Pdpn, Unc13b, Nrcam, Crip2, Rhoj, Cgref1, Foxg1, Ppm1a, Yy1, Sfrs5, Adcy3, Cav2, Prkag2, Met, Bhlhb2, Cyp51, Syn2, Casp2, Kcnh2, Cxcl12, Pparg, Reln, Foxm1, Bcl2l13_predicted, Prkab2, Gclm, Cxxc4, Crabb2, Pdgfc, S100a10, Pde5a, S100a6, Pitx2, Unc5c, Notch2, Pofut1, Tcfap2c, Hnf4a, Src, Dnmt3b, Cd164, Gja1, Neurog3, Nfe2l2, Kcnh7, Cdk9, Grin1, Cacna1b, Calcr1, Serping1, Cd44, Dlx2, Aes, Hrsp12, Zbtb7a, Matk, Cand1, Cart1, Tra1_predicted, Tmpo, Fstl3, Notch3, Tdg, Yeats4_predicted, Socs2, Ascl1, Cnot2, Capzb, Id3, Heyl_predicted, Pou3f1, Mad2l2, Wnt4, Pafah2, Nppb, Nppa, Casp9, Atp2a2, Dynll1, Tcf1, Diablo, Ptpn11, Eif2b1, Trpv4, Vps33a, Mbp, Dscr1, Masp1, Dgkg, Tnk2, Gsk3b, Kcne1, Cd47, Rtn4r, Lphn1, Slc12a4, Ctcf, Bcar1, Gnao, Pou4f2, Mbtps1, Maf, Pkn1, Dnaja2, Timp1, Cacna1f, Mid1, Sh3kbp1, Birc4, Maged1, Morf4l2, Rbbp7, Mig12, Tsc22d3, Apln, Axin2, Vegfc, Prkcd, | 25387, 25621, 293050, 29516, 25718, 65031, 365371, 293524, 25332, 83724, 65158, 140657, 170724, 156767, 25492, 54320, 64830, 497815, 338401, 299145, 245918, 24370, 24666, 24919, 29667, 64508, 363425, 373545, 24553, 79431, 25427, 29179, 64314, 117018, 24772, 25664, 24718, 58921, 312682, 64562, 29739, 83824, 29563, 79429, 81778, 171115, 85247, 54284, 362049, 29492, 311551, 362280, 25735, 83805, 444985, 83689, 24392, 60329, 83619, 170739, 362110, 24408, 257648, 25029, 295703, 25406, 296499, 29466, 65151, 117107, 60450, 117152, 25401, 362862, 25359, 114031, 56761, 114521, 299810, 84607, 64186, 299805, 298584, 25585, 313575, 192110, 313702, 84426, 313611, 25105, 24602, 58918, 29693, 58945, 24817, 288753, 25622, 64514, 66026, 65081, 24547, 266766, 64023, 25666, 303882, 84027, 25471, 29364, 113912, 65096, 29501, 83726, 25414, 50664, 171355, 89842, 54267, 29355, 84026, |

|                                             |             |     |        |                                                                                                                                                                                                                                                                                                                                                                                                                                                                                                                                                                                                                                                                                                                                                                                                                                                                                                                                                                                                                                                                                                                                                                                                                                               |                                                                                                                                                                                                                                                                                                                                                                                                                                                                                                                                                                                                                                                                                                                                                                                                                                                                                                                                                                                                                                                                                                                                                                                                              |
|---------------------------------------------|-------------|-----|--------|-----------------------------------------------------------------------------------------------------------------------------------------------------------------------------------------------------------------------------------------------------------------------------------------------------------------------------------------------------------------------------------------------------------------------------------------------------------------------------------------------------------------------------------------------------------------------------------------------------------------------------------------------------------------------------------------------------------------------------------------------------------------------------------------------------------------------------------------------------------------------------------------------------------------------------------------------------------------------------------------------------------------------------------------------------------------------------------------------------------------------------------------------------------------------------------------------------------------------------------------------|--------------------------------------------------------------------------------------------------------------------------------------------------------------------------------------------------------------------------------------------------------------------------------------------------------------------------------------------------------------------------------------------------------------------------------------------------------------------------------------------------------------------------------------------------------------------------------------------------------------------------------------------------------------------------------------------------------------------------------------------------------------------------------------------------------------------------------------------------------------------------------------------------------------------------------------------------------------------------------------------------------------------------------------------------------------------------------------------------------------------------------------------------------------------------------------------------------------|
|                                             |             |     |        | Bmpr1a, Lzts1, Ppp2cb, Fgfr1, Casp3, Sh3md2, Rab3a, Edn1, Tcfap2a_predicted, Smad5, Sncb, Nfil3, Barx1_predicted, Neurod3, Gprk6, Inhba, Exoc2, Ptch1, Id4, Dbn1, Timp2, Neurod2, Axin1, Sost, Smarcd2, Mafg, Hcrt, Ubtf, Snip                                                                                                                                                                                                                                                                                                                                                                                                                                                                                                                                                                                                                                                                                                                                                                                                                                                                                                                                                                                                                | 116510, 114493, 54252, 84357, 63879, 84469, 317413, 83712, 404280, 83514, 58812, 29134, 114111, 170538, 81507, 266711, 24673, 79114, 25402, 306417, 25531, 24323, 306862, 59328, 113893, 114519, 364680, 29410, 59076, 29200, 171455, 89830, 291023, 81653, 29543, 54276, 79257, 80722, 83833, 64188, 25723, 25574, 56029                                                                                                                                                                                                                                                                                                                                                                                                                                                                                                                                                                                                                                                                                                                                                                                                                                                                                    |
| regulation of biological process            | 4.50759e-05 | 159 | 122.00 | Arrb1, Cd81, Abhd2_predicted, Pde3b, Igf1r, Doc2a, Tbx6_predicted, Bag3, Mgmt, Ncoa2, Rab2, Faf1, Anp32b, Tnfrsf1b, Nfia, Pdpn, Unc13b, Nrcam, Crip2, Rhoj, Cgref1, Foxg1, Ppm1a, Yy1, Sfrs5, Adcy3, Cav2, Met, Bhlhb2, Cyp51, Syn2, Casp2, Kcnh2, Cxcl12, Pparg, Reln, Foxm1, Bcl2l13_predicted, Gclm, Cxxc4, Crabp2, Pdgfc, S100a10, S100a6, Pitx2, Unc5c, Notch2, Pofut1, Tcfap2c, Hnf4a, Src, Dnmt3b, Cd164, Gja1, Neurog3, Nfe2l2, Kcnh7, Cdk9, Grin1, Cacna1b, Calcr, Serping1, Cd44, Dlx2, Aes, Hrsp12, Zbtb7a, Matk, Cand1, Cart1, Tra1_predicted, Tmpo, Fstl3, Notch3, Tdg, Yeats4_predicted, Socs2, Ascl1, Cnot2, Capzb, Id3, Heyl_predicted, Pou3f1, Mad2l2, Wnt4, Pafah2, Nppb, Nppa, Casp9, Atp2a2, Dynll1, Tcf1, Diablo, Ptpn11, Eif2b1, Trpv4, Vps33a, Mbp, Dscr1, Masp1, Dgkg, Tnk2, Gsk3b, Kcne1, Cd47, Rtn4r, Lphn1, Slc12a4, Ctcf, Bcar1, Gnao, Pou4f2, Mbtps1, Maf, Pkn1, Dnaja2, Timp1, Cacna1f, Mid1, Sh3kbp1, Birc4, Maged1, Morf4l2, Rbbp7, Mig12, Tsc22d3, Apln, Axin2, Vegfc, Prkcd, Bmpr1a, Lzts1, Ppp2cb, Fgfr1, Casp3, Sh3md2, Rab3a, Edn1, Tcfap2a_predicted, Smad5, Sncb, Nfil3, Barx1_predicted, Neurod3, Gprk6, Inhba, Exoc2, Ptch1, Id4, Dbn1, Timp2, Neurod2, Axin1, Sost, Smarcd2, Mafg, Hcrt, Ubtf, Snip | 25387, 25621, 293050, 29516, 25718, 65031, 365371, 293524, 25332, 83724, 65158, 140657, 170724, 156767, 25492, 54320, 64830, 497815, 338401, 299145, 245918, 24370, 24666, 24919, 29667, 64508, 363425, 24553, 79431, 25427, 29179, 64314, 117018, 24772, 25664, 24718, 58921, 312682, 29739, 83824, 29563, 79429, 81778, 85247, 54284, 362049, 29492, 311551, 362280, 25735, 83805, 444985, 83689, 24392, 60329, 83619, 170739, 362110, 24408, 257648, 25029, 295703, 25406, 296499, 29466, 65151, 117107, 60450, 117152, 25401, 362862, 25359, 114031, 56761, 114521, 299810, 84607, 64186, 299805, 298584, 25585, 313575, 192110, 313702, 84426, 313611, 25105, 24602, 58918, 29693, 58945, 24817, 288753, 25622, 64514, 66026, 65081, 24547, 266766, 64023, 25666, 303882, 84027, 25471, 29364, 113912, 65096, 29501, 83726, 25414, 50664, 171355, 89842, 54267, 29355, 84026, 116510, 114493, 54252, 84357, 63879, 84469, 317413, 83712, 404280, 83514, 58812, 29134, 114111, 170538, 81507, 266711, 24673, 79114, 25402, 306417, 25531, 24323, 306862, 59328, 113893, 114519, 364680, 29410, 59076, 29200, 171455, 89830, 291023, 81653, 29543, 54276, 79257, 80722, 83833, 64188, 25723, 25574, 56029 |
| cell projection organization and biogenesis | 5.2296e-05  | 25  | 10.56  | Igf1r, Pak1, Sdcbp, Nrcam, Foxg1, Cxcl12, Reln, S100a6, Unc5c, Ss18l1, Gja1, Stxbp1, Rtn4rl2, Capzb, Ptpn11, Mbp, Alcam, Ncam2, Rtn4r, Gnao, Pou4f2, L1cam, Lzts1, Fgfr1, Dbn1                                                                                                                                                                                                                                                                                                                                                                                                                                                                                                                                                                                                                                                                                                                                                                                                                                                                                                                                                                                                                                                                | 25718, 29431, 83841, 497815, 24370, 24772, 24718, 85247, 362049, 192352, 24392, 25558, 311169, 298584, 25622, 24547, 79559, 288280, 113912, 50664, 171355, 50687, 266711, 79114, 81653                                                                                                                                                                                                                                                                                                                                                                                                                                                                                                                                                                                                                                                                                                                                                                                                                                                                                                                                                                                                                       |
| cell projection morphogenesis               | 5.2296e-05  | 25  | 10.56  | Igf1r, Pak1, Sdcbp, Nrcam, Foxg1, Cxcl12, Reln, S100a6, Unc5c, Ss18l1, Gja1, Stxbp1, Rtn4rl2, Capzb, Ptpn11, Mbp, Alcam, Ncam2, Rtn4r, Gnao, Pou4f2, L1cam, Lzts1, Fgfr1, Dbn1                                                                                                                                                                                                                                                                                                                                                                                                                                                                                                                                                                                                                                                                                                                                                                                                                                                                                                                                                                                                                                                                | 25718, 29431, 83841, 497815, 24370, 24772, 24718, 85247, 362049, 192352, 24392, 25558, 311169, 298584, 25622, 24547, 79559, 288280, 113912, 50664, 171355, 50687, 266711, 79114, 81653                                                                                                                                                                                                                                                                                                                                                                                                                                                                                                                                                                                                                                                                                                                                                                                                                                                                                                                                                                                                                       |
| multicellular organismal development        | 5.97878e-05 | 113 | 80.90  | Fgf3, Pde3b, Igf1r, Mesdc2, Doc2a, Agc1, Tbx6_predicted, Pak1, Fgf15, Tmod1, Nr4a3, Ugcg, Pdpn, Nrcam, Crip2, Foxg1, Yy1, Sftpb, Met, Bhlhb2, C1galt1, Cxcl12, Reln, Ptpn12, Foxm1, Crabp2, Lmo4, Pdgfc, Pde5a, S100a6, Tspan2, Pitx2, Unc5c, Notch2, Plcg1, Tcfap2c, Ss18l1, Src, Cd164, Gja1, Neurog3,                                                                                                                                                                                                                                                                                                                                                                                                                                                                                                                                                                                                                                                                                                                                                                                                                                                                                                                                      | 170633, 29516, 25718, 308796, 65031, 58968, 365371, 29431, 170582, 25566, 58853, 83626, 54320, 497815, 338401, 24370, 24919, 192155, 24553, 79431, 65044, 24772, 24718, 117255, 58921, 29563, 362051, 79429, 171115, 85247, 64521, 54284, 362049, 29492, 25738,                                                                                                                                                                                                                                                                                                                                                                                                                                                                                                                                                                                                                                                                                                                                                                                                                                                                                                                                              |

|                                |             |     |        |                                                                                                                                                                                                                                                                                                                                                                                                                                                                                                                                                                                                                                                                                                                                                                                                                                                                                                                                                                                                          |                                                                                                                                                                                                                                                                                                                                                                                                                                                                                                                                                                                                                                                                                                                                                                                                                                                                |
|--------------------------------|-------------|-----|--------|----------------------------------------------------------------------------------------------------------------------------------------------------------------------------------------------------------------------------------------------------------------------------------------------------------------------------------------------------------------------------------------------------------------------------------------------------------------------------------------------------------------------------------------------------------------------------------------------------------------------------------------------------------------------------------------------------------------------------------------------------------------------------------------------------------------------------------------------------------------------------------------------------------------------------------------------------------------------------------------------------------|----------------------------------------------------------------------------------------------------------------------------------------------------------------------------------------------------------------------------------------------------------------------------------------------------------------------------------------------------------------------------------------------------------------------------------------------------------------------------------------------------------------------------------------------------------------------------------------------------------------------------------------------------------------------------------------------------------------------------------------------------------------------------------------------------------------------------------------------------------------|
|                                |             |     |        | <p>Fnbp1, Nfe2l2, Stxbp1, Calcl, Atf2, Rtn4rl2, Cd44, Acvr1, Dlx2, Aes, Zbtb7a, Matk, Cart1, Notch3, Dgat1, Socs2, Ascl1, Id3, Heyl_predicted, Pou3f1, Wnt4, Nppb, Ptpn11, Vps33a, Lnk, Mbp, Dscr1, Txnrd2, Alcam, Dgkg, Ncam2, Cxadr, Gsk3b, Clcn2, Rtn4r, Dok4_predicted, Gnao, Pou4f2, Siah1a, Timp1, Mid1, Rbbp7, L1cam, Gpm6b, Dgcr2, Axin2, Vegfc, Bmpr1a, Lzts1, Fgfr1, Sncg, Casp3, Mustn1, Wnt5a, Nr2f6, Edn1, Tcfap2a_predicted, Smad5, Srd5a1, Barx1_predicted, Neurod3, Inhba, Ptch1, Id4, Ninj1, Dbn1, Timp2, Neurod2, Axin1, Sost, Mafg, Nptx1</p>                                                                                                                                                                                                                                                                                                                                                                                                                                         | <p>362280, 192352, 83805, 83689, 24392, 60329, 192348, 83619, 25558, 25029, 81647, 311169, 25406, 79558, 296499, 29466, 117107, 60450, 25401, 56761, 84497, 84607, 64186, 25585, 313575, 192110, 84426, 25105, 25622, 65081, 58838, 24547, 266766, 50551, 79559, 25666, 288280, 89843, 84027, 29232, 113912, 361364, 50664, 171355, 140941, 116510, 54252, 83712, 50687, 192179, 360742, 29134, 114111, 81507, 266711, 79114, 64347, 25402, 290553, 64566, 245980, 24323, 306862, 59328, 24950, 364680, 29410, 29200, 89830, 291023, 25338, 81653, 29543, 54276, 79257, 80722, 64188, 266777</p>                                                                                                                                                                                                                                                               |
| system development             | 0.000112509 | 101 | 71.54  | <p>Fgf3, Pde3b, Igf1r, Mesdc2, Doc2a, Agc1, Tbx6_predicted, Pak1, Fgf15, Tmod1, Nr4a3, Ugcg, Pdpn, Nrcam, Crip2, Foxg1, Sftpb, Met, Bhlhb2, C1galt1, Cxcl12, Reln, Ptpn12, Foxm1, Crabp2, Lmo4, Pdgfc, Pde5a, S100a6, Tspan2, Pitx2, Unc5c, Notch2, Ss18l1, Src, Gja1, Fnbp1, Stxbp1, Calcl, Atf2, Rtn4rl2, Cd44, Acvr1, Dlx2, Aes, Zbtb7a, Matk, Cart1, Notch3, Dgat1, Socs2, Ascl1, Id3, Heyl_predicted, Pou3f1, Wnt4, Nppb, Ptpn11, Vps33a, Lnk, Mbp, Dscr1, Txnrd2, Alcam, Dgkg, Ncam2, Cxadr, Gsk3b, Clcn2, Rtn4r, Dok4_predicted, Gnao, Pou4f2, L1cam, Gpm6b, Dgcr2, Axin2, Vegfc, Bmpr1a, Lzts1, Fgfr1, Sncg, Casp3, Mustn1, Wnt5a, Nr2f6, Edn1, Tcfap2a_predicted, Smad5, Barx1_predicted, Neurod3, Inhba, Ptch1, Id4, Ninj1, Dbn1, Timp2, Neurod2, Sost, Mafg, Nptx1</p>                                                                                                                                                                                                                        | <p>170633, 29516, 25718, 308796, 65031, 58968, 365371, 29431, 170582, 25566, 58853, 83626, 54320, 497815, 338401, 24370, 192155, 24553, 79431, 65044, 24772, 24718, 117255, 58921, 29563, 362051, 79429, 171115, 85247, 64521, 54284, 362049, 29492, 192352, 83805, 24392, 192348, 25558, 25029, 81647, 311169, 25406, 79558, 296499, 29466, 117107, 60450, 25401, 56761, 84497, 84607, 64186, 25585, 313575, 192110, 84426, 25105, 25622, 65081, 58838, 24547, 266766, 50551, 79559, 25666, 288280, 89843, 84027, 29232, 113912, 361364, 50664, 171355, 50687, 192179, 360742, 29134, 114111, 81507, 266711, 79114, 64347, 25402, 290553, 64566, 245980, 24323, 306862, 59328, 364680, 29410, 29200, 89830, 291023, 25338, 81653, 29543, 54276, 80722, 64188, 266777</p>                                                                                      |
| regulation of cellular process | 0.000161678 | 133 | 100.83 | <p>Arrb1, Cd81, Abhd2_predicted, Igf1r, Tbx6_predicted, Bag3, Mgmt, Ncoa2, Rab2, Faf1, Anp32b, Tnfrsf1b, Nfia, Pdpn, Unc13b, Nrcam, Crip2, Cgref1, Foxg1, Ppm1a, Yy1, Sfrs5, Cav2, Bhlhb2, Cyp51, Casp2, Kcnh2, Cxcl12, Pparg, Reln, Foxm1, Bcl2l13_predicted, Gclm, Cxxc4, Crabp2, Pdgfc, S100a10, S100a6, Pitx2, Unc5c, Notch2, Pofut1, Tcfap2c, Hnf4a, Src, Cd164, Gja1, Neurog3, Nfe2l2, Kcnh7, Cdk9, Calcl, Cd44, Dlx2, Aes, Hrsp12, Zbtb7a, Matk, Cand1, Cart1, Tra1_predicted, Tmpo, Fstl3, Notch3, Tdg, Yeats4_predicted, Socs2, Ascl1, Cnot2, Capzb, Id3, Heyl_predicted, Pou3f1, Mad2l2, Wnt4, Pafah2, Nppb, Nppa, Casp9, Tcf1, Diablo, Ptpn11, Eif2b1, Dscr1, Tnk2, Gsk3b, Cd47, Slc12a4, Ctcf, Bcar1, Pou4f2, Mbtps1, Maf, Dnaja2, Timp1, Mid1, Sh3kbp1, Birc4, Maged1, Morf4l2, Rbbp7, Mig12, Tsc22d3, Apln, Axin2, Vegfc, Prkcd, Bmpr1a, Lzts1, Ppp2cb, Fgfr1, Casp3, Sh3md2, Rab3a, Edn1, Tcfap2a_predicted, Smad5, Nfil3, Barx1_predicted, Neurod3, Gprk6, Inhba, Exoc2, Ptch1, Id4,</p> | <p>25387, 25621, 293050, 25718, 365371, 293524, 25332, 83724, 65158, 140657, 170724, 156767, 25492, 54320, 64830, 497815, 338401, 245918, 24370, 24666, 24919, 29667, 363425, 79431, 25427, 64314, 117018, 24772, 25664, 24718, 58921, 312682, 29739, 83824, 29563, 79429, 81778, 85247, 54284, 362049, 29492, 311551, 362280, 25735, 83805, 83689, 24392, 60329, 83619, 170739, 362110, 25029, 25406, 296499, 29466, 65151, 117107, 60450, 117152, 25401, 362862, 25359, 114031, 56761, 114521, 299810, 84607, 64186, 299805, 298584, 25585, 313575, 192110, 313702, 84426, 313611, 25105, 24602, 58918, 24817, 288753, 25622, 64514, 266766, 303882, 84027, 29364, 29501, 83726, 25414, 171355, 89842, 54267, 84026, 116510, 54252, 84357, 63879, 84469, 317413, 83712, 404280, 83514, 58812, 29134, 114111, 170538, 81507, 266711, 24673, 79114, 25402,</p> |

|                                             |             |    |       |                                                                                                                                                                                                                                                                                                                                                                                                                                                                                                                                                                                                                                                                                                                                     |                                                                                                                                                                                                                                                                                                                                                                                                                                                                                                                                                                                                                                                                                                                                            |
|---------------------------------------------|-------------|----|-------|-------------------------------------------------------------------------------------------------------------------------------------------------------------------------------------------------------------------------------------------------------------------------------------------------------------------------------------------------------------------------------------------------------------------------------------------------------------------------------------------------------------------------------------------------------------------------------------------------------------------------------------------------------------------------------------------------------------------------------------|--------------------------------------------------------------------------------------------------------------------------------------------------------------------------------------------------------------------------------------------------------------------------------------------------------------------------------------------------------------------------------------------------------------------------------------------------------------------------------------------------------------------------------------------------------------------------------------------------------------------------------------------------------------------------------------------------------------------------------------------|
|                                             |             |    |       | Timp2, Neurod2, Axin1, Sost, Smarcd2, Mafg, Ubtf, Snip                                                                                                                                                                                                                                                                                                                                                                                                                                                                                                                                                                                                                                                                              | 306417, 25531, 24323, 306862, 59328, 114519, 364680, 29410, 59076, 29200, 171455, 89830, 291023, 29543, 54276, 79257, 80722, 83833, 64188, 25574, 56029                                                                                                                                                                                                                                                                                                                                                                                                                                                                                                                                                                                    |
| regulation of cell differentiation          | 0.000318119 | 18 | 7.24  | Nrcam, Foxg1, Pparg, S100a10, Notch2, Zbtb7a, Notch3, Socs2, Id3, Pou3f1, Wnt4, Dscr1, Axin2, Ppp2cb, Inhba, Id4, Timp2, Mafg                                                                                                                                                                                                                                                                                                                                                                                                                                                                                                                                                                                                       | 497815, 24370, 25664, 81778, 29492, 117107, 56761, 84607, 25585, 192110, 84426, 266766, 29134, 24673, 29200, 291023, 29543, 64188                                                                                                                                                                                                                                                                                                                                                                                                                                                                                                                                                                                                          |
| cell organization and biogenesis            | 0.000338709 | 97 | 70.11 | Arrb1, Ap2a2, Picalm, Igf1r, Pak1, Prc1_predicted, Rab2, Sdcbp, Faf1, Tmod1, Clta, Kif1b, Eps15, Nrcam, Rhoj, Cgref1, Foxg1, Rock2, Sfrs5, Cav2, Zfp384, Arf5, Dctn1, Cxcl12, Reln, Ppp3ca, S100a10, S100a6, Syt6, Unc5c, Sep15, Notch2, Ss18l1, Cd24, Gja1, Gylt1b, Arl5a, Stxbp1, Rtn4rl2, Cd44, Akap8, Hrsp12, Ywhaz, Tmpo, Vezt, Socs2, Capzb, Ebna1bp2, Nppb, Nppa, Dynll1, Erp29, Ptpn11, Eif2b1, Mbp, Alcam, Ncam2, Tnk2, Cxadr, Gsk3b, Ap2m1, Cd47, Rtn4r, MAST1, Bcar1, Gnao, Pou4f2, Glg1, Mbtps1, Tomm20, Bcap31, Mid1, Morf4l2, Rbbp7, Mig12, L1cam, Slc25a1, Myo9b, Lzts1, Ppp2cb, Arf4, Fgfr1, Casp3, Vps36_predicted, Rab3a, Kif27, Bicd2, Hist1h1t, Exoc2, Dbn1, Arhgap27, Prm2, Cltc, Smarcd2, Kpnb1, Rpl23, H3f3b | 25387, 81637, 89816, 25718, 29431, 308761, 65158, 83841, 140657, 25566, 83800, 117548, 313474, 497815, 299145, 245918, 24370, 25537, 29667, 363425, 171018, 79117, 29167, 24772, 24718, 24674, 81778, 85247, 60565, 362049, 113922, 29492, 192352, 25145, 24392, 311202, 117050, 25558, 311169, 25406, 116633, 65151, 25578, 25359, 299738, 84607, 298584, 114021, 25105, 24602, 58945, 117030, 25622, 64514, 24547, 79559, 288280, 303882, 89843, 84027, 116563, 29364, 113912, 353118, 25414, 50664, 171355, 29476, 89842, 266601, 293852, 54252, 317413, 83712, 404280, 50687, 29743, 25486, 266711, 24673, 79120, 79114, 25402, 290851, 25531, 246209, 306809, 24438, 171455, 81653, 303583, 25345, 54241, 83833, 24917, 29282, 117056 |
| pattern specification process               | 0.000386352 | 17 | 6.73  | Fgf3, Tbx6_predicted, Foxg1, Yy1, Cxcl12, Pitx2, Notch2, Acvr1, Ascl1, Mid1, Axin2, Bmpr1a, Fgfr1, Edn1, Smad5, Ptch1, Axin1                                                                                                                                                                                                                                                                                                                                                                                                                                                                                                                                                                                                        | 170633, 365371, 24370, 24919, 24772, 54284, 29492, 79558, 64186, 54252, 29134, 81507, 79114, 24323, 59328, 89830, 79257                                                                                                                                                                                                                                                                                                                                                                                                                                                                                                                                                                                                                    |
| neurite morphogenesis                       | 0.000467362 | 18 | 7.47  | Nrcam, Foxg1, Cxcl12, Reln, S100a6, Unc5c, Gja1, Stxbp1, Rtn4rl2, Ptpn11, Mbp, Alcam, Ncam2, Rtn4r, Gnao, Pou4f2, L1cam, Lzts1                                                                                                                                                                                                                                                                                                                                                                                                                                                                                                                                                                                                      | 497815, 24370, 24772, 24718, 85247, 362049, 24392, 25558, 311169, 25622, 24547, 79559, 288280, 113912, 50664, 171355, 50687, 266711                                                                                                                                                                                                                                                                                                                                                                                                                                                                                                                                                                                                        |
| neuron morphogenesis during differentiation | 0.000467362 | 18 | 7.47  | Nrcam, Foxg1, Cxcl12, Reln, S100a6, Unc5c, Gja1, Stxbp1, Rtn4rl2, Ptpn11, Mbp, Alcam, Ncam2, Rtn4r, Gnao, Pou4f2, L1cam, Lzts1                                                                                                                                                                                                                                                                                                                                                                                                                                                                                                                                                                                                      | 497815, 24370, 24772, 24718, 85247, 362049, 24392, 25558, 311169, 25622, 24547, 79559, 288280, 113912, 50664, 171355, 50687, 266711                                                                                                                                                                                                                                                                                                                                                                                                                                                                                                                                                                                                        |
| positive regulation of biological process   | 0.000682018 | 66 | 44.69 | Arrb1, Cd81, Igf1r, Tbx6_predicted, Ncoa2, Faf1, Pdpm, Unc13b, Nrcam, Crip2, Foxg1, Ppm1a, Adcy3, Met, Casp2, Cxcl12, Pparg, Reln, Foxm1, Bcl2l13_predicted, Gclm, Pdgfc, S100a6, Notch2, Hnf4a, Src, Gja1, Neurog3, Nfe2l2, Calcr1, Serping1, Dlx2, Matk, Cand1, Socs2, Id3, Casp9, Tcf1, Diablo, Ptpn11, Masp1, Dgkg, Tnk2, Gsk3b, Cd47, Ctf, Bcar1, Maf, Pkn1, Dnaja2, Timp1, Apln, Vegfc, Prkcd, Bmpr1a, Ppp2cb, Fgfr1, Casp3, Sh3md2, Edn1, Tcfap2a_predicted, Smad5, Inhba, Exoc2, Id4, Timp2                                                                                                                                                                                                                                 | 25387, 25621, 25718, 365371, 83724, 140657, 54320, 64830, 497815, 338401, 24370, 24666, 64508, 24553, 64314, 24772, 25664, 24718, 58921, 312682, 29739, 79429, 85247, 29492, 25735, 83805, 24392, 60329, 83619, 25029, 295703, 296499, 60450, 117152, 84607, 25585, 58918, 24817, 288753, 25622, 64023, 25666, 303882, 84027, 29364, 83726, 25414, 54267, 29355, 84026, 116510, 58812, 114111, 170538, 81507, 24673, 79114, 25402, 306417, 24323, 306862, 59328, 29200, 171455, 291023, 29543                                                                                                                                                                                                                                              |
| generation of a signal involved in          | 0.000863313 | 13 | 4.75  | Pde3b, Doc2a, Unc13b, Syn2, Cacna1b, Dgat1, Trpv4, Lphn1, Cacna1f, Rab3a, Edn1, Inhba, Hcrt                                                                                                                                                                                                                                                                                                                                                                                                                                                                                                                                                                                                                                         | 29516, 65031, 64830, 29179, 257648, 84497, 66026, 65096, 114493, 25531, 24323, 29200, 25723                                                                                                                                                                                                                                                                                                                                                                                                                                                                                                                                                                                                                                                |

## cell-cell signaling

|                                                           |             |    |       |                                                                                                                                                                                                                                                                                                                                                                                                                                  |                                                                                                                                                                                                                                                                                                                                                                                                                        |
|-----------------------------------------------------------|-------------|----|-------|----------------------------------------------------------------------------------------------------------------------------------------------------------------------------------------------------------------------------------------------------------------------------------------------------------------------------------------------------------------------------------------------------------------------------------|------------------------------------------------------------------------------------------------------------------------------------------------------------------------------------------------------------------------------------------------------------------------------------------------------------------------------------------------------------------------------------------------------------------------|
| positive regulation of cellular process                   | 0.000898809 | 56 | 36.81 | Cd81, Igf1r, Tbx6_predicted, Ncoa2, Faf1, Pdpn, Unc13b, Nrcam, Crip2, Foxg1, Ppm1a, Casp2, Cxcl12, Pparg, Foxm1, Bcl2l13_predicted, Pdgfc, S100a6, Notch2, Hnf4a, Src, Gja1, Neurog3, Nfe2l2, Calcr1, Dlx2, Matk, Cand1, Socs2, Id3, Casp9, Tcf1, Diablo, Tnk2, Gsk3b, Cd47, Ctcf, Bcar1, Maf, Dnaja2, Timp1, Apln, Vegfc, Prkcd, Bmpr1a, Ppp2cb, Fgfr1, Casp3, Sh3md2, Edn1, Tcfap2a_predicted, Smad5, Inhba, Exoc2, Id4, Timp2 | 25621, 25718, 365371, 83724, 140657, 54320, 64830, 497815, 338401, 24370, 24666, 64314, 24772, 25664, 58921, 312682, 79429, 85247, 29492, 25735, 83805, 24392, 60329, 83619, 25029, 296499, 60450, 117152, 84607, 25585, 58918, 24817, 288753, 303882, 84027, 29364, 83726, 25414, 54267, 84026, 116510, 58812, 114111, 170538, 81507, 24673, 79114, 25402, 306417, 24323, 306862, 59328, 29200, 171455, 291023, 29543 |
| platelet-derived growth factor receptor signaling pathway | 0.000908702 | 3  | 0.23  | Pdgfc, Src, Bcar1                                                                                                                                                                                                                                                                                                                                                                                                                | 79429, 83805, 25414                                                                                                                                                                                                                                                                                                                                                                                                    |
| axonogenesis                                              | 0.00110502  | 16 | 6.73  | Nrcam, Foxg1, Cxcl12, Reln, S100a6, Unc5c, Stxbp1, Rtn4rl2, Ptpn11, Mbp, Alcam, Ncam2, Rtn4r, Gnao, Pou4f2, L1cam                                                                                                                                                                                                                                                                                                                | 497815, 24370, 24772, 24718, 85247, 362049, 25558, 311169, 25622, 24547, 79559, 288280, 113912, 50664, 171355, 50687                                                                                                                                                                                                                                                                                                   |
| metal ion transport                                       | 0.00115141  | 23 | 11.48 | Npy, Kcnh2, Ppp3ca, Accn5, Kcnd3, Plcg1, Kcnh7, Cacnb4, Grin1, Cacna1b, Slc34a3, Hcn2, Kcnq3, Grik3, Atp2a2, Kcne1, Cacna1f, Cacna2d3, Kcnmb1, Cacng4, Cacnb1, Cacna1g, Kcnh4                                                                                                                                                                                                                                                    | 24604, 117018, 24674, 63866, 65195, 25738, 170739, 58942, 24408, 257648, 246234, 114244, 29682, 298521, 29693, 25471, 114493, 306243, 29747, 140725, 50688, 29717, 114032                                                                                                                                                                                                                                              |
| calcium ion transport                                     | 0.00115823  | 11 | 3.74  | Npy, Ppp3ca, Plcg1, Cacnb4, Cacna1b, Atp2a2, Cacna1f, Cacna2d3, Cacng4, Cacnb1, Cacna1g                                                                                                                                                                                                                                                                                                                                          | 24604, 24674, 25738, 58942, 257648, 29693, 114493, 306243, 140725, 50688, 29717                                                                                                                                                                                                                                                                                                                                        |
| transmission of nerve impulse                             | 0.00131716  | 32 | 18.22 | Doc2a, Sdcbp, Gabrd, Unc13b, Nrcam, Npy, Slc6a1, Cav2, Bhlhb2, Syn2, Cd24, Grin1, Cacna1b, Lynx1_predicted, Kcnq3, Pou3f1, Grik3, Mbp, Lphn1, Cacna1f, Gabra3, Lzts1, Rab3a, Edn1, Sncb, Dbn1, Kcnmb1, Cacng4, Hcrt, Nptx1, Grin2a, Gabrb2                                                                                                                                                                                       | 65031, 83841, 29689, 64830, 497815, 24604, 79212, 363425, 79431, 29179, 25145, 24408, 257648, 300018, 29682, 192110, 298521, 24547, 65096, 114493, 24947, 266711, 25531, 24323, 113893, 81653, 29747, 140725, 25723, 266777, 24409, 25451                                                                                                                                                                              |
| negative regulation of cellular process                   | 0.00135224  | 55 | 36.62 | Arrb1, Abhd2_predicted, Igf1r, Bag3, Ncoa2, Faf1, Cgref1, Foxg1, Yy1, Cav2, Bhlhb2, Pparg, Gclm, Cxxc4, Notch2, Cd164, Gja1, Aes, Zbtb7a, Tra1_predicted, Fstl3, Notch3, Tdg, Capzb, Id3, Pou3f1, Wnt4, Pafah2, Nppb, Nppa, Tcf1, Eif2b1, Dscr1, Gsk3b, Ctcf, Pou4f2, Timp1, Mid1, Birc4, Rbbp7, Mig12, Tsc22d3, Axin2, Ppp2cb, Fgfr1, Casp3, Edn1, Tcfap2a_predicted, Barx1_predicted, Inhba, Id4, Timp2, Axin1, Sost, Snip     | 25387, 293050, 25718, 293524, 83724, 140657, 245918, 24370, 24919, 363425, 79431, 25664, 29739, 83824, 29492, 83689, 24392, 29466, 117107, 362862, 114031, 56761, 114521, 298584, 25585, 192110, 84426, 313611, 25105, 24602, 24817, 64514, 266766, 84027, 83726, 171355, 116510, 54252, 63879, 83712, 404280, 83514, 29134, 24673, 79114, 25402, 24323, 306862, 364680, 29200, 291023, 29543, 79257, 80722, 56029     |
| cellular morphogenesis during differentiation             | 0.0014169   | 18 | 8.21  | Nrcam, Foxg1, Cxcl12, Reln, S100a6, Unc5c, Gja1, Stxbp1, Rtn4rl2, Ptpn11, Mbp, Alcam, Ncam2, Rtn4r, Gnao, Pou4f2, L1cam, Lzts1                                                                                                                                                                                                                                                                                                   | 497815, 24370, 24772, 24718, 85247, 362049, 24392, 25558, 311169, 25622, 24547, 79559, 288280, 113912, 50664, 171355, 50687, 266711                                                                                                                                                                                                                                                                                    |
| negative regulation of                                    | 0.00141983  | 11 | 3.83  | Foxg1, Notch2, Notch3, Id3, Wnt4, Mbp, Dscr1, Rtn4r, Axin2, Inhba, Id4                                                                                                                                                                                                                                                                                                                                                           | 24370, 29492, 56761, 25585, 84426, 24547, 266766, 113912, 29134, 29200, 291023                                                                                                                                                                                                                                                                                                                                         |

|                                                       |            |    |       |                                                                                                                                                                                                                     |                                                                                                                                                                                                                   |
|-------------------------------------------------------|------------|----|-------|---------------------------------------------------------------------------------------------------------------------------------------------------------------------------------------------------------------------|-------------------------------------------------------------------------------------------------------------------------------------------------------------------------------------------------------------------|
| developmental process                                 |            |    |       |                                                                                                                                                                                                                     |                                                                                                                                                                                                                   |
| synaptic transmission                                 | 0.00163234 | 29 | 16.19 | Doc2a, Sdcbp, Gabrd, Unc13b, Npy, Slc6a1, Cav2, Bhlhb2, Syn2, Cd24, Grin1, Cacna1b, Lynx1_predicted, Kcnq3, Grik3, Mbp, Lphn1, Cacna1f, Gabra3, Ltzs1, Rab3a, Edn1, Sncb, Dbn1, Kcnmb1, Hcrt, Nptx1, Grin2a, Gabrb2 | 65031, 83841, 29689, 64830, 24604, 79212, 363425, 79431, 29179, 25145, 24408, 257648, 300018, 29682, 298521, 24547, 65096, 114493, 24947, 266711, 25531, 24323, 113893, 81653, 29747, 25723, 266777, 24409, 25451 |
| nerve growth factor receptor signaling pathway        | 0.00175446 | 3  | 0.28  | Src, Ptpn11, Bcar1                                                                                                                                                                                                  | 83805, 25622, 25414                                                                                                                                                                                               |
| embryonic development                                 | 0.00187565 | 24 | 12.64 | Tbx6_predicted, Nr4a3, Cxcl12, Crabp2, Lmo4, Pitx2, Notch2, Plcg1, Tcfap2c, Gja1, Nfe2l2, Acvr1, Wnt4, Lnk, Axin2, Vegfc, Fgfr1, Mustn1, Wnt5a, Edn1, Smad5, Neurod3, Ptch1, Mafg                                   | 365371, 58853, 24772, 29563, 362051, 54284, 29492, 25738, 362280, 24392, 83619, 79558, 84426, 58838, 29134, 114111, 79114, 290553, 64566, 24323, 59328, 29410, 89830, 64188                                       |
| negative regulation of cell differentiation           | 0.00200038 | 9  | 2.86  | Foxg1, Notch2, Notch3, Id3, Wnt4, Dscr1, Axin2, Inhba, Id4                                                                                                                                                          | 24370, 29492, 56761, 25585, 84426, 266766, 29134, 29200, 291023                                                                                                                                                   |
| heart development                                     | 0.00209547 | 12 | 4.61  | Fgf15, Pitx2, Gja1, Calcrl, Acvr1, Id3, Nppb, Txnrd2, Cxadr, Bmpr1a, Casp3, Edn1                                                                                                                                    | 170582, 54284, 24392, 25029, 79558, 25585, 25105, 50551, 89843, 81507, 25402, 24323                                                                                                                               |
| regulation of Wnt receptor signaling pathway          | 0.00224577 | 5  | 0.97  | Cxxc4, Axin2, Ppp2cb, Barx1_predicted, Axin1                                                                                                                                                                        | 83824, 29134, 24673, 364680, 79257                                                                                                                                                                                |
| epidermal growth factor receptor signaling pathway    | 0.00224577 | 5  | 0.97  | Eps15, Src, Bcar1, Arf4, Grb2                                                                                                                                                                                       | 313474, 83805, 25414, 79120, 81504                                                                                                                                                                                |
| cell fate commitment                                  | 0.00269323 | 10 | 3.55  | Fgf3, Tbx6_predicted, Pparg, Notch2, Aes, Notch3, Ascl1, Fgfr1, Casp3, Neurod3                                                                                                                                      | 170633, 365371, 25664, 29492, 29466, 56761, 64186, 79114, 25402, 29410                                                                                                                                            |
| cation transport                                      | 0.00283757 | 26 | 14.53 | Npy, Kcnh2, Ppp3ca, Accn5, Kcnd3, Plcg1, Atp5g3, Kcnh7, Cacnb4, Grin1, Cacna1b, Slc34a3, Hcn2, Kcnq3, Grik3, Atp2a2, Trpv4, Kcne1, Cacna1f, Atp6ap1, Cacna2d3, Kcnmb1, Cacng4, Cacnb1, Cacna1g, Kcnh4               | 24604, 117018, 24674, 63866, 65195, 25738, 114630, 170739, 58942, 24408, 257648, 246234, 114244, 29682, 298521, 29693, 66026, 25471, 114493, 83615, 306243, 29747, 140725, 50688, 29717, 114032                   |
| positive regulation of neuron differentiation         | 0.00296356 | 3  | 0.32  | Nrcam, Socs2, Timp2                                                                                                                                                                                                 | 497815, 84607, 29543                                                                                                                                                                                              |
| negative regulation of Wnt receptor signaling pathway | 0.00308655 | 4  | 0.65  | Cxxc4, Axin2, Barx1_predicted, Axin1                                                                                                                                                                                | 83824, 29134, 364680, 79257                                                                                                                                                                                       |
| fluid secretion                                       | 0.00308655 | 4  | 0.65  | Clcnk1, Nppb, Tsc22d3, Edn1                                                                                                                                                                                         | 79425, 25105, 83514, 24323                                                                                                                                                                                        |
|                                                       | 0.0035551  | 29 | 17.07 |                                                                                                                                                                                                                     |                                                                                                                                                                                                                   |

|                                           |            |    |       |                                                                                                                                                                                                                                                                                                                                                                                                                                                 |                                                                                                                                                                                                                                                                                                                                                                                                                                          |
|-------------------------------------------|------------|----|-------|-------------------------------------------------------------------------------------------------------------------------------------------------------------------------------------------------------------------------------------------------------------------------------------------------------------------------------------------------------------------------------------------------------------------------------------------------|------------------------------------------------------------------------------------------------------------------------------------------------------------------------------------------------------------------------------------------------------------------------------------------------------------------------------------------------------------------------------------------------------------------------------------------|
| protein amino acid phosphorylation        |            |    |       | Cd81, Phkg2, Igf1r, Pak1, Pink1_predicted, Rock2, Prkch, Met, Reln, Pdgfc, Src, Cdk9, Hipk3, Stk39, Acvr1, Matk, Csnk1g2, Tnk2, Gsk3b, Tssk2, MAST1, Pkn1, Btk, Vegfc, Prkcd, Ppp2cb, Fgfr1, Gprk6, Il12b                                                                                                                                                                                                                                       | 25621, 140671, 25718, 29431, 298575, 25537, 81749, 24553, 24718, 79429, 83805, 362110, 83617, 54348, 79558, 60450, 65278, 303882, 84027, 304181, 353118, 29355, 367901, 114111, 170538, 24673, 79114, 59076, 64546                                                                                                                                                                                                                       |
| epithelial cell differentiation           | 0.00368476 | 7  | 2.03  | Pparg, Gja1, Neurog3, Plec1, Id3, Kcne1, Barx1_predicted                                                                                                                                                                                                                                                                                                                                                                                        | 25664, 24392, 60329, 64204, 25585, 25471, 364680                                                                                                                                                                                                                                                                                                                                                                                         |
| tissue development                        | 0.00410288 | 24 | 13.42 | Mesdc2, Agc1, Tbx6_predicted, Nr4a3, Ugcg, Ptpn12, Crabp2, Notch2, Gja1, Rtn4rl2, Zbtb7a, Matk, Cart1, Notch3, Alcam, Axin2, Bmpr1a, Mustn1, Edn1, Tcfap2a_predicted, Smad5, Barx1_predicted, Sost, Mafg                                                                                                                                                                                                                                        | 308796, 58968, 365371, 58853, 83626, 117255, 29563, 29492, 24392, 311169, 117107, 60450, 25401, 56761, 79559, 29134, 81507, 290553, 24323, 306862, 59328, 364680, 80722, 64188                                                                                                                                                                                                                                                           |
| phosphate metabolic process               | 0.00415479 | 38 | 24.40 | Cd81, Phkg2, Igf1r, Pak1, Pink1_predicted, Rock2, Ppm1a, Prkch, Met, Reln, Ptpn12, Ppp3ca, Pdgfc, Ptpn1, Src, Ndufs3_predicted, Cdk9, Hipk3, Stk39, Acvr1, Phpt1_predicted, Matk, Csnk1g2, Tnk2, Gsk3b, Tssk2, MAST1, Pkn1, Pdp2, Btk, Vegfc, Prkcd, Ppp2cb, Fgfr1, Dusp4, Gprk6, Inhba, Il12b                                                                                                                                                  | 25621, 140671, 25718, 29431, 298575, 25537, 24666, 81749, 24553, 24718, 117255, 24674, 79429, 24697, 83805, 295923, 362110, 83617, 54348, 79558, 296571, 60450, 65278, 303882, 84027, 304181, 353118, 29355, 246311, 367901, 114111, 170538, 24673, 79114, 60587, 59076, 29200, 64546                                                                                                                                                    |
| phosphorus metabolic process              | 0.00415479 | 38 | 24.40 | Cd81, Phkg2, Igf1r, Pak1, Pink1_predicted, Rock2, Ppm1a, Prkch, Met, Reln, Ptpn12, Ppp3ca, Pdgfc, Ptpn1, Src, Ndufs3_predicted, Cdk9, Hipk3, Stk39, Acvr1, Phpt1_predicted, Matk, Csnk1g2, Tnk2, Gsk3b, Tssk2, MAST1, Pkn1, Pdp2, Btk, Vegfc, Prkcd, Ppp2cb, Fgfr1, Dusp4, Gprk6, Inhba, Il12b                                                                                                                                                  | 25621, 140671, 25718, 29431, 298575, 25537, 24666, 81749, 24553, 24718, 117255, 24674, 79429, 24697, 83805, 295923, 362110, 83617, 54348, 79558, 296571, 60450, 65278, 303882, 84027, 304181, 353118, 29355, 246311, 367901, 114111, 170538, 24673, 79114, 60587, 59076, 29200, 64546                                                                                                                                                    |
| regulation of neuron differentiation      | 0.00415929 | 6  | 1.57  | Nrcam, Foxg1, Notch3, Socs2, Id4, Timp2                                                                                                                                                                                                                                                                                                                                                                                                         | 497815, 24370, 56761, 84607, 291023, 29543                                                                                                                                                                                                                                                                                                                                                                                               |
| negative regulation of biological process | 0.00432734 | 58 | 41.19 | Arrb1, Abhd2_predicted, Igf1r, Bag3, Ncoa2, Faf1, Cgref1, Foxg1, Yy1, Cav2, Bhlhb2, Pparg, Gclm, Cxhc4, Notch2, Cd164, Gja1, Aes, Zbtb7a, Tra1_predicted, Fstl3, Notch3, Tdg, Capzb, Id3, Pou3f1, Wnt4, Pafah2, Nppb, Nppa, Tcf1, Eif2b1, Mbp, Dscr1, Gsk3b, Rtn4r, Ctcf, Pou4f2, Timp1, Mid1, Birc4, Rbbp7, Mig12, Tsc22d3, Axin2, Ppp2cb, Fgfr1, Casp3, Edn1, Tcfap2a_predicted, Barx1_predicted, Inhba, Ptch1, Id4, Timp2, Axin1, Sost, Snip | 25387, 293050, 25718, 293524, 83724, 140657, 245918, 24370, 24919, 363425, 79431, 25664, 29739, 83824, 29492, 83689, 24392, 29466, 117107, 362862, 114031, 56761, 114521, 298584, 25585, 192110, 84426, 313611, 25105, 24602, 24817, 64514, 24547, 266766, 84027, 113912, 83726, 171355, 116510, 54252, 63879, 83712, 404280, 83514, 29134, 24673, 79114, 25402, 24323, 306862, 364680, 29200, 89830, 291023, 29543, 79257, 80722, 56029 |
| cell migration                            | 0.00434393 | 22 | 11.99 | Abhd2_predicted, Gab2, Fgf15, Sdcbp, Pdpn, Nrcam, Foxg1, Met, Cxcl12, Reln, Pitx2, Unc5c, Gja1, Acvr1, Ascl1, Alcam, Cd47, Bcar1, Gnao, Pou4f2, L1cam, Vegfc                                                                                                                                                                                                                                                                                    | 293050, 84477, 170582, 83841, 54320, 497815, 24370, 24553, 24772, 24718, 54284, 362049, 24392, 79558, 64186, 79559, 29364, 25414, 50664, 171355, 50687, 114111                                                                                                                                                                                                                                                                           |
| small GTPase mediated signal              | 0.00461694 | 15 | 7.06  | Pak1, Sdcbp, Rhoj, Reln, RSA-14-44, Notch2, Arl5a, Tnk2, Rasd2, Gdi1, Myo9b, Ppp2cb, Rab3a, Timp2, Grb2                                                                                                                                                                                                                                                                                                                                         | 29431, 83841, 299145, 24718, 297173, 29492, 117050, 303882, 171099, 25183, 25486, 24673, 25531, 29543,                                                                                                                                                                                                                                                                                                                                   |



|                                             |            |    |       |                                                                                                                                                                                                                                                                                                               |                                                                                                                                                                                                                                                                                                                                |
|---------------------------------------------|------------|----|-------|---------------------------------------------------------------------------------------------------------------------------------------------------------------------------------------------------------------------------------------------------------------------------------------------------------------|--------------------------------------------------------------------------------------------------------------------------------------------------------------------------------------------------------------------------------------------------------------------------------------------------------------------------------|
| transduction                                |            |    |       |                                                                                                                                                                                                                                                                                                               | 81504                                                                                                                                                                                                                                                                                                                          |
| localization of cell                        | 0.00497237 | 28 | 16.70 | Abhd2_predicted, Gab2, Fgf15, Sdcbp, Pdpn, Nrcam, Foxg1, Npy, Met, Akap3, Cxcl12, Reln, Tspan2, Pitx2, Unc5c, Gja1, Acvr1, Ascl1, Capzb, Alcam, Cd47, Cd97, Bcar1, Gnao, Pou4f2, L1cam, Dnai2, Vegfc                                                                                                          | 293050, 84477, 170582, 83841, 54320, 497815, 24370, 24604, 24553, 312720, 24772, 24718, 64521, 54284, 362049, 24392, 79558, 64186, 298584, 79559, 29364, 361383, 25414, 50664, 171355, 50687, 360654, 114111                                                                                                                   |
| cell motility                               | 0.00497237 | 28 | 16.70 | Abhd2_predicted, Gab2, Fgf15, Sdcbp, Pdpn, Nrcam, Foxg1, Npy, Met, Akap3, Cxcl12, Reln, Tspan2, Pitx2, Unc5c, Gja1, Acvr1, Ascl1, Capzb, Alcam, Cd47, Cd97, Bcar1, Gnao, Pou4f2, L1cam, Dnai2, Vegfc                                                                                                          | 293050, 84477, 170582, 83841, 54320, 497815, 24370, 24604, 24553, 312720, 24772, 24718, 64521, 54284, 362049, 24392, 79558, 64186, 298584, 79559, 29364, 361383, 25414, 50664, 171355, 50687, 360654, 114111                                                                                                                   |
| cAMP metabolic process                      | 0.00503666 | 5  | 1.15  | Arrb1, Adcy3, Adcy5, Edn1, Timp2                                                                                                                                                                                                                                                                              | 25387, 64508, 64532, 24323, 29543                                                                                                                                                                                                                                                                                              |
| glutamate signaling pathway                 | 0.00503666 | 5  | 1.15  | Grid2, Grin1, Grik3, Homer3, Grin2a                                                                                                                                                                                                                                                                           | 79220, 24408, 298521, 29548, 24409                                                                                                                                                                                                                                                                                             |
| positive regulation of cell migration       | 0.00521392 | 4  | 0.74  | Pdpn, Cxcl12, Bcar1, Vegfc                                                                                                                                                                                                                                                                                    | 54320, 24772, 25414, 114111                                                                                                                                                                                                                                                                                                    |
| morphogenesis of an epithelium              | 0.00531612 | 11 | 4.52  | Pparg, Lmo4, Notch2, Gja1, Neurog3, Plec1, Id3, Wnt4, Kcne1, Vegfc, Barx1_predicted                                                                                                                                                                                                                           | 25664, 362051, 29492, 24392, 60329, 64204, 25585, 84426, 25471, 114111, 364680                                                                                                                                                                                                                                                 |
| limb morphogenesis                          | 0.00537136 | 7  | 2.17  | Crabp2, Notch2, Bmpr1a, Fgfr1, Mustn1, Wnt5a, Ptch1                                                                                                                                                                                                                                                           | 29563, 29492, 81507, 79114, 290553, 64566, 89830                                                                                                                                                                                                                                                                               |
| appendage morphogenesis                     | 0.00537136 | 7  | 2.17  | Crabp2, Notch2, Bmpr1a, Fgfr1, Mustn1, Wnt5a, Ptch1                                                                                                                                                                                                                                                           | 29563, 29492, 81507, 79114, 290553, 64566, 89830                                                                                                                                                                                                                                                                               |
| appendage development                       | 0.00537136 | 7  | 2.17  | Crabp2, Notch2, Bmpr1a, Fgfr1, Mustn1, Wnt5a, Ptch1                                                                                                                                                                                                                                                           | 29563, 29492, 81507, 79114, 290553, 64566, 89830                                                                                                                                                                                                                                                                               |
| cell proliferation                          | 0.00573655 | 44 | 29.84 | Cd81, Igf1r, Anp32b, Tnfrsf1b, Eps15, Crip2, Cgref1, Npy, Cav2, Met, Cxcl12, Pparg, Foxm1, Tspan5, Pdgfc, S100a6, Tspan2, Pitx2, Notch2, Src, Cd164, Gja1, Cdk9, Calcr1, Matk, Ascl1, Id3, Gsk3b, Bcar1, Dnaja2, Timp1, Rbbp7, Apln, Axin2, Vegfc, Prkcd, Bmpr1a, Fgfr1, Casp3, Edn1, Ptch1, Id4, Timp2, Mafg | 25621, 25718, 170724, 156767, 313474, 338401, 245918, 24604, 363425, 24553, 24772, 25664, 58921, 362048, 79429, 85247, 64521, 54284, 29492, 83805, 83689, 24392, 362110, 25029, 60450, 64186, 25585, 84027, 25414, 84026, 116510, 83712, 58812, 29134, 114111, 170538, 81507, 79114, 25402, 24323, 89830, 291023, 29543, 64188 |
| spermidine metabolic process                | 0.00607554 | 2  | 0.14  | Srm, Dhps                                                                                                                                                                                                                                                                                                     | 84596, 288923                                                                                                                                                                                                                                                                                                                  |
| epithelial cell development                 | 0.00607554 | 2  | 0.14  | Gja1, Kcne1                                                                                                                                                                                                                                                                                                   | 24392, 25471                                                                                                                                                                                                                                                                                                                   |
| di-, tri-valent inorganic anion homeostasis | 0.00607554 | 2  | 0.14  | Slc34a3, Slc9a3r1                                                                                                                                                                                                                                                                                             | 246234, 59114                                                                                                                                                                                                                                                                                                                  |
| ribosomal protein import into nucleus       | 0.00607554 | 2  | 0.14  | Kpnb1, Rpl23                                                                                                                                                                                                                                                                                                  | 24917, 29282                                                                                                                                                                                                                                                                                                                   |

|                                                        |            |    |       |                                                                                                                                                                                                                                     |                                                                                                                                                                                                                                   |
|--------------------------------------------------------|------------|----|-------|-------------------------------------------------------------------------------------------------------------------------------------------------------------------------------------------------------------------------------------|-----------------------------------------------------------------------------------------------------------------------------------------------------------------------------------------------------------------------------------|
| negative regulation of Ras protein signal transduction | 0.00607554 | 2  | 0.14  | Ppp2cb, Timp2                                                                                                                                                                                                                       | 24673, 29543                                                                                                                                                                                                                      |
| epithelial cell maturation                             | 0.00607554 | 2  | 0.14  | Gja1, Kcne1                                                                                                                                                                                                                         | 24392, 25471                                                                                                                                                                                                                      |
| phosphate ion homeostasis                              | 0.00607554 | 2  | 0.14  | Slc34a3, Slc9a3r1                                                                                                                                                                                                                   | 246234, 59114                                                                                                                                                                                                                     |
| growth                                                 | 0.00626116 | 19 | 10.15 | Cd81, Cgref1, Ptpn12, S100a10, Notch2, Gja1, Rtn4rl2, Cd44, Aes, Notch3, Socs2, Nppb, Nppa, Bcar1, Morf4l2, Ppp2cb, Fgfr1, Mustn1, Ptch1                                                                                            | 25621, 245918, 117255, 81778, 29492, 24392, 311169, 25406, 29466, 56761, 84607, 25105, 24602, 25414, 317413, 24673, 79114, 290553, 89830                                                                                          |
| cartilage development                                  | 0.00709478 | 5  | 1.25  | Agc1, Zbtb7a, Cart1, Bmpr1a, Edn1                                                                                                                                                                                                   | 58968, 117107, 25401, 81507, 24323                                                                                                                                                                                                |
| protein transport                                      | 0.00739005 | 25 | 14.85 | Ap2a2, Rab2, Sdcbp, Faf1, Clta, Arf5, Ppp3ca, Gylt1b, Arl5a, Tra1_predicted, Ywhaz, Erp29, Ptpn11, Gsk3b, Ap2m1, Glg1, Mbtps1, Tomm20, Bcap31, Gdi1, Arf4, Rab3a, Cltc, Kpnb1, Rpl23                                                | 81637, 65158, 83841, 140657, 83800, 79117, 24674, 311202, 117050, 362862, 25578, 117030, 25622, 84027, 116563, 29476, 89842, 266601, 293852, 25183, 79120, 25531, 54241, 24917, 29282                                             |
| protein localization                                   | 0.00764172 | 29 | 18.03 | Ap2a2, Cd81, Rab2, Sdcbp, Faf1, Clta, Arf5, Akap3, Ppp3ca, Dnmt3b, Gylt1b, Arl5a, Tra1_predicted, Ywhaz, Erp29, Ptpn11, Gsk3b, Ap2m1, Glg1, Mbtps1, Tomm20, Bcap31, Gdi1, Vegfc, Arf4, Rab3a, Cltc, Kpnb1, Rpl23                    | 81637, 25621, 65158, 83841, 140657, 83800, 79117, 312720, 24674, 444985, 311202, 117050, 362862, 25578, 117030, 25622, 84027, 116563, 29476, 89842, 266601, 293852, 25183, 114111, 79120, 25531, 54241, 24917, 29282              |
| tube development                                       | 0.00809569 | 12 | 5.44  | Pdpn, Cxcl12, Lmo4, Pitx2, Gja1, Cd44, Wnt4, Clcn2, Bmpr1a, Fgfr1, Wnt5a, Edn1                                                                                                                                                      | 54320, 24772, 362051, 54284, 24392, 25406, 84426, 29232, 81507, 79114, 64566, 24323                                                                                                                                               |
| phosphorylation                                        | 0.00825698 | 31 | 19.74 | Cd81, Phkg2, Igf1r, Pak1, Pink1_predicted, Rock2, Prkch, Met, Reln, Pdgc, Src, Ndufs3_predicted, Cdk9, Hipk3, Stk39, Acvr1, Matk, Csnk1g2, Tnk2, Gsk3b, Tsk2, MAST1, Pkn1, Btk, Vegfc, Prkcd, Ppp2cb, Fgfr1, Gprk6, Inhba, Il12b    | 25621, 140671, 25718, 29431, 298575, 25537, 81749, 24553, 24718, 79429, 83805, 295923, 362110, 83617, 54348, 79558, 60450, 65278, 303882, 84027, 304181, 353118, 29355, 367901, 114111, 170538, 24673, 79114, 59076, 29200, 64546 |
| potassium ion transport                                | 0.00826756 | 10 | 4.15  | Kcnh2, Kcnd3, Kcnh7, Grin1, Hcn2, Kcnq3, Grik3, Kcne1, Kcnmb1, Kcnh4                                                                                                                                                                | 117018, 65195, 170739, 24408, 114244, 29682, 298521, 25471, 29747, 114032                                                                                                                                                         |
| cyclic nucleotide metabolic process                    | 0.00831604 | 6  | 1.80  | Arrb1, Adcy3, Pde5a, Adcy5, Edn1, Timp2                                                                                                                                                                                             | 25387, 64508, 171115, 64532, 24323, 29543                                                                                                                                                                                         |
| ion transport                                          | 0.0089354  | 30 | 19.05 | Npy, Kcnh2, Slc4a5, Ppp3ca, Accn5, Kcnd3, Plcg1, Atp5g3, Kcnh7, Cacnb4, Grin1, Cacna1b, Slc34a3, Hcn2, Kcnq3, Grik3, Atp2a2, Trpv4, Clcn2, Clic6, Kcne1, Cacna1f, Atp6ap1, Cacna2d3, Kcnmb1, Cacng4, Cacnb1, Cacna1g, Gabrb2, Kcnh4 | 24604, 117018, 297386, 24674, 63866, 65195, 25738, 114630, 170739, 58942, 24408, 257648, 246234, 114244, 29682, 298521, 29693, 66026, 29232, 304081, 25471, 114493, 83615, 306243, 29747, 140725, 50688, 29717, 25451, 114032     |
| protein kinase cascade                                 | 0.00913949 | 23 | 13.56 | Arrb1, Cd81, Pak1, Faf1, Ppm1a, Met, Cr16, Gja1, Plekhg5, Ptpn11, Ifnar1_predicted, MAST1, Dok4_predicted, Pkn1, Btk,                                                                                                               | 25387, 25621, 29431, 140657, 24666, 24553, 259242, 24392, 310999, 25622, 288264, 353118, 361364, 29355,                                                                                                                           |

|                         |            |   |      |                                                         |                                                                  |
|-------------------------|------------|---|------|---------------------------------------------------------|------------------------------------------------------------------|
|                         |            |   |      | PPP2CB, FGFR1, SH3MD2, WNT5A, SH3BP5, EDN1, TIMP2, GRB2 | 367901, 24673, 79114, 306417, 64566, 117186, 24323, 29543, 81504 |
| chromosome condensation | 0.00917094 | 3 | 0.46 | ROCK2, AKAP8, PRM2                                      | 25537, 116633, 25345                                             |

**GO category "molecular\_function"**

Number of genes annotated in GO: 422  
 Number of significant GO groups found: 40

| GO group        | p-value     | # genes (observed) | # genes (expected) | list of genes                                                                                                                                                                                                                                                                                                                                                                                                                                                                                                                                                                                                                                                                                                                                                                                                                                                                                                                                                                                                                                                                                                                                                                                                                                                                                                                                                                                                                                                                                                                                                                                                                                                                             | GeneIDs                                                                                                                                                                                                                                                                                                                                                                                                                                                                                                                                                                                                                                                                                                                                                                                                                                                                                                                                                                                                                                                                                                                                                                                                                                                                                                                                                                                                                |
|-----------------|-------------|--------------------|--------------------|-------------------------------------------------------------------------------------------------------------------------------------------------------------------------------------------------------------------------------------------------------------------------------------------------------------------------------------------------------------------------------------------------------------------------------------------------------------------------------------------------------------------------------------------------------------------------------------------------------------------------------------------------------------------------------------------------------------------------------------------------------------------------------------------------------------------------------------------------------------------------------------------------------------------------------------------------------------------------------------------------------------------------------------------------------------------------------------------------------------------------------------------------------------------------------------------------------------------------------------------------------------------------------------------------------------------------------------------------------------------------------------------------------------------------------------------------------------------------------------------------------------------------------------------------------------------------------------------------------------------------------------------------------------------------------------------|------------------------------------------------------------------------------------------------------------------------------------------------------------------------------------------------------------------------------------------------------------------------------------------------------------------------------------------------------------------------------------------------------------------------------------------------------------------------------------------------------------------------------------------------------------------------------------------------------------------------------------------------------------------------------------------------------------------------------------------------------------------------------------------------------------------------------------------------------------------------------------------------------------------------------------------------------------------------------------------------------------------------------------------------------------------------------------------------------------------------------------------------------------------------------------------------------------------------------------------------------------------------------------------------------------------------------------------------------------------------------------------------------------------------|
| protein binding | 6.00066e-09 | 218                | 161.07             | Arrb1, Itgad, Ap2a2, Cd81, Picalm, Ric8a, Igf1r, Agc1, Pak1, Gab2, Bag3, Trpc2, Prc1_predicted, Fgf15, Ncoa2, Faah, Sdcbp, Klhl17, Faf1, Tmod1, Kif1b, Fbxo6b, Tesk1, Tnfrsf1b, Atp6v1g1_predicted, Msc_predicted, Eps15, Tdrd7, Nrcam, Crip2, Rhoj, Rock2, Dtnb, Yy1, Sfrs5, Begain, Adcy3, Chn2, Rtkn, Npy, Cav2, Prkag2, Zfp384, Met, Bhlhb2, Grid2, Dctn1, Syn2, Casp2, Cr16, Akap3, Cxcl12, Pparg, Prkab2, Gclm, Cxxc4, Pias3, Sf3b4, Ppp3ca, Plrg1, Lmo4, Pdgfc, Cnn3, S100a6, Syt6, Pitx2, Unc5c, Kcnd3, Sep15, Notch2, Map2k1ip1, Ptpn1, Plcg1, Tcfap2c, A, Epb4.1l1, Ss18l1, Trp53rk_predicted, Src, Dlgap4, Arfgef2, Dnmt3b, Gja1, Fnbp1, Nfe2l2, Atp5g3, Cdk9, Grin1, Cacna1b, Stk39, Stxbp1, Atf2, Chn1, Cd44, Acvr1, Sh3glb2, Dlx2, Akap8, Aes, Zbtb7a, Vps28_predicted, Matk, Lynx1_predicted, Ptbp1, Cand1, Cart1, Plec1, Tra1_predicted, Ywhaz, Tmpo, Fstl3, Tdg, Vezt, Nxph4, Fbxo7, Yeats4_predicted, Socs2, Ascl1, Capzb, Id3, Mad2l2, Ebna1bp2, Hpcal4, Wnt4, Nppb, Dlgap3, Nppa, Casp9, Grik3, Dynl1, Tcf1, Ptpn11, Eif2b1, Trpv4, Lnk, Fgf12, Dscr1, Txnrd2, Alcam, Tnk2, Cxadr, Gsk3b, Clcn2, Ap2m1, Clic6, Ifnar1_predicted, Kcne1, Cd47, Rtn4r, Tradd, Lphn1, Cd97, Ctcf, Bcar1, Vps4a, Glg1, Siah1a, Maf, Pkn1, Tomm20, Bcap31, Timp1, Mid1, Sh3kbp1, Gdi1, Maged1, Morf4l2, Rbbp7, Mig12, Apln, Btk, Axin2, Vegfc, Myo9b, Upf3a, Prkcd, Lzts1, Ppp2cb, Arf4, Fgfr1, Vps36_predicted, Sh3md2, Wnt5a, Sh3bp5, Rab3a, Edn1, Tcfap2a_predicted, Smad5, Nfil3, Birc2, Mxd3, Gkap1, Ctst, Inhba, Fbp1, Exoc2, Ptch1, Id4, Dbn1, Il12b, Timp2, Axin1, Dnajc7, Sfrs2, Sost, Cltc, Cacnb1, Smarcd2, Emp2, Grb2, Hcrt, Ubtf, Kpnb1, Nxph3, Snip, Grin2a, Gabrb2, Pip5k2b | 25387, 64350, 81637, 25621, 89816, 293614, 25718, 58968, 29431, 84477, 293524, 64573, 308761, 170582, 83724, 29347, 83841, 246757, 140657, 25566, 117548, 192351, 29460, 156767, 298103, 312897, 313474, 85425, 497815, 338401, 299145, 25537, 362715, 24919, 29667, 79146, 64508, 84031, 297383, 24604, 363425, 373545, 171018, 24553, 79431, 79220, 29167, 29179, 64314, 259242, 312720, 24772, 25664, 64562, 29739, 83824, 83614, 295270, 24674, 60376, 362051, 79429, 54321, 85247, 60565, 54284, 362049, 65195, 113922, 29492, 362045, 24697, 25738, 362280, 24152, 59317, 192352, 362272, 83805, 286930, 296380, 444985, 24392, 192348, 83619, 114630, 362110, 24408, 257648, 54348, 25558, 81647, 84030, 25406, 79558, 311848, 296499, 116633, 29466, 117107, 300052, 60450, 300018, 29497, 117152, 25401, 64204, 362862, 25578, 25359, 114031, 114521, 299738, 59316, 366854, 299810, 84607, 64186, 298584, 25585, 313702, 114021, 50872, 84426, 25105, 286923, 24602, 58918, 298521, 58945, 24817, 25622, 64514, 66026, 58838, 170630, 266766, 50551, 79559, 303882, 89843, 84027, 29232, 116563, 304081, 288264, 25471, 29364, 113912, 246756, 65096, 361383, 83726, 25414, 246772, 29476, 140941, 54267, 29355, 266601, 293852, 116510, 54252, 84357, 25183, 84469, 317413, 83712, 404280, 58812, 367901, 29134, 114111, 25486, 361176, 170538, 266711, 24673, 79120, 79114, 290851, 306417, 64566, 117186, |

|         |             |     |        |                                                                                                                                                                                                                                                                                                                                                                                                                                                                                                                                                                                                                                                                                                                                                                                                                                                                                                                                                                                                                                                                                                                                                                                                                                                                                                                                                                                                                                                                                                                                                                                                                                                                                                                                                                                                                                                                                                                                                                                                                                                                                                                                                                                                                                                    |                                                                                                                                                                                                                                                                                                                                                                                                                                                                                                                                                                                                                                                                                                                                                                                                                                                                                                                                                                                                                                                                                                                                                                                                                                                                                                                                                                                                                                                                                                                                                                                                                                                                                                                                                   |
|---------|-------------|-----|--------|----------------------------------------------------------------------------------------------------------------------------------------------------------------------------------------------------------------------------------------------------------------------------------------------------------------------------------------------------------------------------------------------------------------------------------------------------------------------------------------------------------------------------------------------------------------------------------------------------------------------------------------------------------------------------------------------------------------------------------------------------------------------------------------------------------------------------------------------------------------------------------------------------------------------------------------------------------------------------------------------------------------------------------------------------------------------------------------------------------------------------------------------------------------------------------------------------------------------------------------------------------------------------------------------------------------------------------------------------------------------------------------------------------------------------------------------------------------------------------------------------------------------------------------------------------------------------------------------------------------------------------------------------------------------------------------------------------------------------------------------------------------------------------------------------------------------------------------------------------------------------------------------------------------------------------------------------------------------------------------------------------------------------------------------------------------------------------------------------------------------------------------------------------------------------------------------------------------------------------------------------|---------------------------------------------------------------------------------------------------------------------------------------------------------------------------------------------------------------------------------------------------------------------------------------------------------------------------------------------------------------------------------------------------------------------------------------------------------------------------------------------------------------------------------------------------------------------------------------------------------------------------------------------------------------------------------------------------------------------------------------------------------------------------------------------------------------------------------------------------------------------------------------------------------------------------------------------------------------------------------------------------------------------------------------------------------------------------------------------------------------------------------------------------------------------------------------------------------------------------------------------------------------------------------------------------------------------------------------------------------------------------------------------------------------------------------------------------------------------------------------------------------------------------------------------------------------------------------------------------------------------------------------------------------------------------------------------------------------------------------------------------|
|         |             |     |        |                                                                                                                                                                                                                                                                                                                                                                                                                                                                                                                                                                                                                                                                                                                                                                                                                                                                                                                                                                                                                                                                                                                                                                                                                                                                                                                                                                                                                                                                                                                                                                                                                                                                                                                                                                                                                                                                                                                                                                                                                                                                                                                                                                                                                                                    | 25531, 24323, 306862, 59328, 114519, 306809, 252915, 361202, 25697, 29200, 24362, 171455, 89830, 291023, 81653, 64546, 29543, 79257, 303536, 494445, 80722, 54241, 50688, 83833, 360468, 81504, 25723, 25574, 24917, 59315, 56029, 24409, 25451, 89812                                                                                                                                                                                                                                                                                                                                                                                                                                                                                                                                                                                                                                                                                                                                                                                                                                                                                                                                                                                                                                                                                                                                                                                                                                                                                                                                                                                                                                                                                            |
| binding | 3.56405e-07 | 287 | 237.78 | Arb1, Itgad, Ap2a2, Cd81, Picalm, Phkg2, Ric8a, Igf1r, Doc2a, Agc1, Tbx6_predicted, Pak1, Gab2, Bag3, Trpc2, Mgmt, Prc1_predicted, Fgf15, Ncoa2, Rab2, Faah, Sdcbp, Klhl17, Faf1, Tmod1, Kif1b, Fbxo6b, Nr4a3, Tesk1, Tnfrsf1b, Atp6v1g1_predicted, Msc_predicted, Nfia, Eps15, Ssbp3, Tdrd7, Nrcam, Crip2, Rhoj, Smoc1, Rock2, Hpcal1, Dtnb, Yy1, Sfrs5, Begain, Adcy3, Chn2, Rtkn, Npy, Cav2, Prkag2, Zfp384, Arf5, Met, Bhlhb2, Grid2, Cyp51, Tacr1, Dctn1, Syn2, Casp2, Cr16, Akap3, Cxcl12, Pparg, Slc6a11, Abp1, Foxm1, Prkab2, Gclm, Cxxc4, Pias3, Adar, Crabp2, Sf3b4, Ppp3ca, Plrg1, Lmo4, Pdgfc, Cnn3, Pde5a, S100a6, Syt6, Pitx2, Unc5c, Kcnd3, Sep15, Notch2, Map2k1ip1, Ptpn1, Plcg1, Tcfap2c, A, Epb4.1l1, Hnf4a, Ss18l1, Trp53rk_predicted, Src, Bpi, Dlgap4, Arfgef2, Top1, Dnmt3b, Psap, Fabp7, Gja1, Neurog3, Fnbp1, Nfe2l2, Tmx2, Atp5g3, Lcn2, Cacnb4, Cdk9, Arl5a, Grin1, Cacna1b, Stk39, Stxbp1, Atf2, Chn1, Cd44, Acvr1, Rbms1, Dgkz, Sh3glb2, Dlx2, Akap8, Aes, Zbtb7a, Vps28_predicted, Matk, Lynx1_predicted, Ptbp1, Cand1, Cart1, Plec1, Tra1_predicted, Shmt2, Ywhaz, Tmpo, Fstl3, Suox, Notch3, Tdg, Siahbp1, Vezt, Nxph4, Fbxo7, Yeats4_predicted, Socs2, Ascl1, Cyp4f6, Capzb, Id3, Heyl_predicted, Pou3f1, Mad2l2, Ebna1bp2, Hpcal4, Wnt4, Pafah2, Nppb, Dlgap3, Nppa, Casp9, Grik3, Padi2, Acads, Abcb9, Atp2a2, Dynll1, Gtpbbp6_predicted, Tcf1, Ptpn11, Eif2b1, Trpv4, Lnk, Fgf12, Dscr1, Txnrd2, Alcam, Tnk2, Cxadr, Gsk3b, Clcn2, Ap2m1, Sfrs10, Clic6, Ifnar1_predicted, Kcne1, Cd47, Rtn4r, Tradd, Lphn1, Cd97, Ctcf, MAST1, Bcar1, Gnao, Vps4a, Pou4f2, Glg1, Siah1a, Maf, Mmaa_predicted, Pkn1, Pdp2, Rasd2, Tomm20, Bcap31, Timp1, Otc, Mid1, Sh3kbp1, Gdi1, Maged1, Morf4l2, Rbbp7, Mig12, Apln, Gabra3, Btk, Slc25a1, Sept9, Axin2, Vegfc, Myo9b, Upf3a, Prkcd, Lzts1, Ppp2cb, Arf4, Fgfr1, Itih3, Vps36_predicted, Sh3md2, Wnt5a, Sh3bp5, Rab3a, Edn1, Tcfap2a_predicted, Smad5, Sephs1, Nfil3, Dek, Bicd2, Barx1_predicted, Mxd3, Neurod3, Gkap1, Hk3, Ctsl, Inhba, Fbp1, Hist1h1t, Exoc2, Ptch1, Id4, Dbn1, Il12b, Timp2, Neurod2, Axin1, Dnajc7, Sfrs2, Sost, Prm2, Cltc, Cacnb1, Abca5, Smarcd2, Emp2, Grb2, Mafg, Hcrt, Ubtf, Kpnb1, Nxph3, Snip, Grin2a, Igf2bp1, Gabrb2, H3f3b, Rnps1, Pip5k2b | 25387, 64350, 81637, 25621, 89816, 140671, 293614, 25718, 65031, 58968, 365371, 29431, 84477, 293524, 64573, 25332, 308761, 170582, 83724, 65158, 29347, 83841, 246757, 140657, 25566, 117548, 192351, 58853, 29460, 156767, 298103, 312897, 25492, 313474, 84354, 85425, 497815, 338401, 299145, 314280, 25537, 50871, 362715, 24919, 29667, 79146, 64508, 84031, 297383, 24604, 363425, 373545, 171018, 79117, 24553, 79431, 79220, 25427, 24807, 29167, 29179, 64314, 259242, 312720, 24772, 25664, 79213, 65029, 58921, 64562, 29739, 83824, 83614, 81635, 29563, 295270, 24674, 60376, 362051, 79429, 54321, 171115, 85247, 60565, 54284, 362049, 65195, 113922, 29492, 362045, 24697, 25738, 362280, 24152, 59317, 25735, 192352, 362272, 83805, 296321, 286930, 296380, 64550, 444985, 25524, 80841, 24392, 60329, 192348, 83619, 295701, 114630, 170496, 58942, 362110, 117050, 24408, 257648, 54348, 25558, 81647, 84030, 25406, 79558, 362138, 81821, 311848, 296499, 116633, 29466, 117107, 300052, 60450, 300018, 29497, 117152, 25401, 64204, 362862, 299857, 25578, 25359, 114031, 81805, 56761, 114521, 84401, 299738, 59316, 366854, 299810, 84607, 64186, 266689, 298584, 25585, 313575, 192110, 313702, 114021, 50872, 84426, 313611, 25105, 286923, 24602, 58918, 298521, 29511, 64304, 63886, 29693, 58945, 363931, 24817, 25622, 64514, 66026, 58838, 170630, 266766, 50551, 79559, 303882, 89843, 84027, 29232, 116563, 117259, 304081, 288264, 25471, 29364, 113912, 246756, 65096, 361383, 83726, 353118, 25414, 50664, 246772, 171355, 29476, 140941, 54267, 291939, 29355, 246311, 171099, 266601, 293852, 116510, 25611, 54252, 84357, 25183, 84469, 317413, 83712, 404280, 58812, 24947, 367901, 29743, 83788, 29134, |

|                                    |             |    |       |                                                                                                                                                                                                                                                                                                                                                                                                                                                                                                                                                |                                                                                                                                                                                                                                                                                                                                                                                                                                                                                                               |
|------------------------------------|-------------|----|-------|------------------------------------------------------------------------------------------------------------------------------------------------------------------------------------------------------------------------------------------------------------------------------------------------------------------------------------------------------------------------------------------------------------------------------------------------------------------------------------------------------------------------------------------------|---------------------------------------------------------------------------------------------------------------------------------------------------------------------------------------------------------------------------------------------------------------------------------------------------------------------------------------------------------------------------------------------------------------------------------------------------------------------------------------------------------------|
|                                    |             |    |       |                                                                                                                                                                                                                                                                                                                                                                                                                                                                                                                                                | 114111, 25486, 361176, 170538, 266711, 24673, 79120, 79114, 50693, 290851, 306417, 64566, 117186, 25531, 24323, 306862, 59328, 291314, 114519, 306817, 306809, 364680, 252915, 29410, 361202, 25060, 25697, 29200, 24362, 24438, 171455, 89830, 291023, 81653, 64546, 29543, 54276, 79257, 303536, 494445, 80722, 25345, 54241, 50688, 286970, 83833, 360468, 81504, 64188, 25723, 25574, 24917, 59315, 56029, 24409, 303477, 25451, 117056, 287113, 89812                                                    |
| voltage-gated ion channel activity | 1.18685e-05 | 17 | 5.11  | Clcnkb, Clcnk1, Kcnh2, Kcnd3, Kcnh7, Cacnb4, Cacna1b, Kcnq3, Clcn2, Clic6, Kcne1, Cacna1f, Cacna2d3, Cacng4, Cacnb1, Cacna1g, Kcnh4                                                                                                                                                                                                                                                                                                                                                                                                            | 79430, 79425, 117018, 65195, 170739, 58942, 257648, 29682, 29232, 304081, 25471, 114493, 306243, 140725, 50688, 29717, 114032                                                                                                                                                                                                                                                                                                                                                                                 |
| ion transporter activity           | 1.34959e-05 | 43 | 21.80 | Slc28a1, Trpc2, Clcnkb, Clcnk1, Atp6v1g1_predicted, Slc5a6, Slc6a1, Kcnh2, Slc6a11, Slc4a5, Abp1, S100a6, Accn5, Kcnd3, Slc32a1, Gja1, Atp5g3, Kcnh7, Cacnb4, Grin1, Cacna1b, Slc34a3, Hcn2, Kcnq3, Grik3, Atp2a2, Trpv4, P2rxl1, Clcn2, Clic6, Kcne1, Slc12a4, Atp6v0d1, Cacna1f, Slc7a3, Cacna2d3, Uqcrfs1, Kcnmb1, Cacng4, Cacnb1, Cacna1g, Gabrb2, Kcnh4                                                                                                                                                                                   | 116642, 64573, 79430, 79425, 298103, 170551, 79212, 117018, 79213, 297386, 65029, 85247, 63866, 65195, 83612, 24392, 114630, 170739, 58942, 24408, 257648, 246234, 114244, 29682, 298521, 29693, 66026, 25041, 29232, 304081, 25471, 29501, 291969, 114493, 29485, 306243, 291103, 29747, 140725, 50688, 29717, 25451, 114032                                                                                                                                                                                 |
| transporter activity               | 1.64463e-05 | 67 | 40.19 | Slc28a1, Doc2a, Trpc2, Clcnkb, Cdw92, Clcnk1, Atp6v1g1_predicted, Slc5a6, Slc6a1, Arf5, Kcnh2, Slc6a11, Slc4a5, Abp1, S100a6, Accn5, Syt6, Kcnd3, Slc32a1, Gja1, Atp5g3, Kcnh7, Cacnb4, Grin1, Cacna1b, Slc34a3, Hcn2, Kcnq3, Slc2a5, Grik3, Abcb9, Atp2a2, Trpv4, P2rxl1, Slc12a8, Atp5j, Clcn2, Ap2m1, Clic6, Kcne1, Slc12a4, Atp6v0d1, Cyb5b, Slc7a5, Tomm20, Cacna1f, Slc7a3, Atp6ap1, Slc38a5, Slc25a1, Slc16a6, Upf3a, Cacna2d3, Arf4, Slc27a1, Rab3a, Uqcrfs1, Kcnmb1, Cygb, Cacng4, Cacnb1, Abca5, Kpnb1, Cacna1g, Gabrb2, Kcnh4, Pctp | 116642, 65031, 64573, 79430, 85254, 79425, 298103, 170551, 79212, 79117, 117018, 79213, 297386, 65029, 85247, 63866, 60565, 65195, 83612, 24392, 114630, 170739, 58942, 24408, 257648, 246234, 114244, 29682, 65197, 298521, 63886, 29693, 66026, 25041, 266733, 94271, 29232, 116563, 304081, 25471, 29501, 291969, 80773, 50719, 266601, 114493, 29485, 83615, 192208, 29743, 303772, 361176, 306243, 79120, 94172, 25531, 291103, 29747, 170520, 140725, 50688, 286970, 24917, 29717, 25451, 114032, 29510 |
| ion channel activity               | 3.5081e-05  | 27 | 11.58 | Trpc2, Clcnkb, Clcnk1, Kcnh2, Abp1, Accn5, Kcnd3, Kcnh7, Cacnb4, Grin1, Cacna1b, Hcn2, Kcnq3, Grik3, Trpv4, P2rxl1, Clcn2, Clic6, Kcne1, Cacna1f, Cacna2d3, Kcnmb1, Cacng4, Cacnb1, Cacna1g, Gabrb2, Kcnh4                                                                                                                                                                                                                                                                                                                                     | 64573, 79430, 79425, 117018, 65029, 63866, 65195, 170739, 58942, 24408, 257648, 114244, 29682, 298521, 66026, 25041, 29232, 304081, 25471, 114493, 306243, 29747, 140725, 50688, 29717, 25451, 114032                                                                                                                                                                                                                                                                                                         |
| cation transporter activity        | 7.18828e-05 | 35 | 17.56 | Slc28a1, Trpc2, Atp6v1g1_predicted, Slc5a6, Slc6a1, Kcnh2, Slc6a11, Abp1, Accn5, Kcnd3, Slc32a1, Atp5g3, Kcnh7, Cacnb4, Grin1, Cacna1b, Slc34a3, Hcn2, Kcnq3, Grik3, Atp2a2, Trpv4, P2rxl1, Kcne1, Slc12a4, Atp6v0d1, Cacna1f, Slc7a3, Cacna2d3, Uqcrfs1, Kcnmb1, Cacng4, Cacnb1, Cacna1g, Kcnh4                                                                                                                                                                                                                                               | 116642, 64573, 298103, 170551, 79212, 117018, 79213, 65029, 63866, 65195, 83612, 114630, 170739, 58942, 24408, 257648, 246234, 114244, 29682, 298521, 29693, 66026, 25041, 25471, 29501, 291969, 114493, 29485, 306243, 291103, 29747,                                                                                                                                                                                                                                                                        |

|                                                    |             |    |       |                                                                                                                                                                                                                  |                                                                                                                                                                                                              |
|----------------------------------------------------|-------------|----|-------|------------------------------------------------------------------------------------------------------------------------------------------------------------------------------------------------------------------|--------------------------------------------------------------------------------------------------------------------------------------------------------------------------------------------------------------|
|                                                    |             |    |       |                                                                                                                                                                                                                  | 140725, 50688, 29717, 114032                                                                                                                                                                                 |
| alpha-type channel activity                        | 7.45837e-05 | 28 | 12.76 | Trpc2, Clcnkb, Clcnk1, Kcnh2, Abp1, Accn5, Kcnd3, Gja1, Kcnh7, Cacnb4, Grin1, Cacna1b, Hcn2, Kcnq3, Grik3, Trpv4, P2rxl1, Clcn2, Clic6, Kcne1, Cacna1f, Cacna2d3, Kcnmb1, Cacng4, Cacnb1, Cacna1g, Gabrb2, Kcnh4 | 64573, 79430, 79425, 117018, 65029, 63866, 65195, 24392, 170739, 58942, 24408, 257648, 114244, 29682, 298521, 66026, 25041, 29232, 304081, 25471, 114493, 306243, 29747, 140725, 50688, 29717, 25451, 114032 |
| channel or pore class transporter activity         | 8.40552e-05 | 28 | 12.84 | Trpc2, Clcnkb, Clcnk1, Kcnh2, Abp1, Accn5, Kcnd3, Gja1, Kcnh7, Cacnb4, Grin1, Cacna1b, Hcn2, Kcnq3, Grik3, Trpv4, P2rxl1, Clcn2, Clic6, Kcne1, Cacna1f, Cacna2d3, Kcnmb1, Cacng4, Cacnb1, Cacna1g, Gabrb2, Kcnh4 | 64573, 79430, 79425, 117018, 65029, 63866, 65195, 24392, 170739, 58942, 24408, 257648, 114244, 29682, 298521, 66026, 25041, 29232, 304081, 25471, 114493, 306243, 29747, 140725, 50688, 29717, 25451, 114032 |
| phorbol ester receptor activity                    | 9.5368e-05  | 5  | 0.52  | Unc13b, Prkch, Chn2, Chn1, Prkcd                                                                                                                                                                                 | 64830, 81749, 84031, 84030, 170538                                                                                                                                                                           |
| cation channel activity                            | 0.000174179 | 22 | 9.39  | Trpc2, Kcnh2, Abp1, Accn5, Kcnd3, Kcnh7, Cacnb4, Grin1, Cacna1b, Hcn2, Kcnq3, Grik3, Trpv4, P2rxl1, Kcne1, Cacna1f, Cacna2d3, Kcnmb1, Cacng4, Cacnb1, Cacna1g, Kcnh4                                             | 64573, 117018, 65029, 63866, 65195, 170739, 58942, 24408, 257648, 114244, 29682, 298521, 66026, 25041, 25471, 114493, 306243, 29747, 140725, 50688, 29717, 114032                                            |
| voltage-gated calcium channel activity             | 0.000195305 | 7  | 1.27  | Cacnb4, Cacna1b, Cacna1f, Cacna2d3, Cacng4, Cacnb1, Cacna1g                                                                                                                                                      | 58942, 257648, 114493, 306243, 140725, 50688, 29717                                                                                                                                                          |
| cyclic-nucleotide phosphodiesterase activity       | 0.000275238 | 6  | 0.96  | Pde3b, Pde2a, Pde8a, Pde4b, Pde5a, Pde11a                                                                                                                                                                        | 29516, 81743, 308776, 24626, 171115, 140928                                                                                                                                                                  |
| protein domain specific binding                    | 0.000382747 | 18 | 7.34  | Faf1, Crip2, Zfp384, Cr16, Cxxc4, Dlgap4, Gja1, Ywhaz, Tdg, Vezt, Id3, Hpcal4, Dlgap3, Clic6, Bcar1, Morf4l2, Ppp2cb, Sh3bp5                                                                                     | 140657, 338401, 171018, 259242, 83824, 286930, 24392, 25578, 114521, 299738, 25585, 50872, 286923, 304081, 25414, 317413, 24673, 117186                                                                      |
| voltage-gated chloride channel activity            | 0.000611095 | 4  | 0.44  | Clcnkb, Clcnk1, Clcn2, Clic6                                                                                                                                                                                     | 79430, 79425, 29232, 304081                                                                                                                                                                                  |
| DNA-methyltransferase activity                     | 0.00077492  | 3  | 0.22  | Mgmt, Dnmt3a, Dnmt3b                                                                                                                                                                                             | 25332, 444984, 444985                                                                                                                                                                                        |
| L-gamma-aminobutyric acid transporter activity     | 0.00077492  | 3  | 0.22  | Slc6a1, Slc6a11, Slc32a1                                                                                                                                                                                         | 79212, 79213, 83612                                                                                                                                                                                          |
| calcium channel activity                           | 0.000843403 | 9  | 2.53  | Trpc2, Cacnb4, Cacna1b, Trpv4, Cacna1f, Cacna2d3, Cacng4, Cacnb1, Cacna1g                                                                                                                                        | 64573, 58942, 257648, 66026, 114493, 306243, 140725, 50688, 29717                                                                                                                                            |
| transcriptional repressor activity                 | 0.00105981  | 18 | 7.99  | Ncoa2, Msc_predicted, Yy1, Bhlhb2, Pparg, Pias3, Plrg1, Aes, Zbtb7a, Cart1, Tdg, Id3, Tcf1, Ctcf, Rbbp7, Nfil3, Id4, Sfrs2                                                                                       | 83724, 312897, 24919, 79431, 25664, 83614, 60376, 29466, 117107, 25401, 114521, 25585, 24817, 83726, 83712, 114519, 291023, 494445                                                                           |
| 3',5'-cyclic-nucleotide phosphodiesterase activity | 0.00139597  | 5  | 0.87  | Pde3b, Pde2a, Pde8a, Pde4b, Pde5a                                                                                                                                                                                | 29516, 81743, 308776, 24626, 171115                                                                                                                                                                          |
|                                                    | 0.00162884  | 24 | 12.49 |                                                                                                                                                                                                                  |                                                                                                                                                                                                              |

|                                                        |            |    |       |                                                                                                                                                                                                                                                                          |                                                                                                                                                                                                                                                                                           |
|--------------------------------------------------------|------------|----|-------|--------------------------------------------------------------------------------------------------------------------------------------------------------------------------------------------------------------------------------------------------------------------------|-------------------------------------------------------------------------------------------------------------------------------------------------------------------------------------------------------------------------------------------------------------------------------------------|
| transcription factor binding                           |            |    |       | Ncoa2, Faf1, Msc_predicted, Yy1, Pias3, Plrg1, Lmo4, Pitx2, Ss18l1, Cdk9, Atf2, Aes, Cart1, Tdg, Id3, Gsk3b, Ctcf, Maged1, Morf4l2, Tcfap2a_predicted, Nfil3, Id4, Sfrs2, Smarcd2                                                                                        | 83724, 140657, 312897, 24919, 83614, 60376, 362051, 54284, 192352, 362110, 81647, 29466, 25401, 114521, 25585, 84027, 83726, 84469, 317413, 306862, 114519, 291023, 494445, 83833                                                                                                         |
| transcription corepressor activity                     | 0.00164011 | 11 | 3.89  | Msc_predicted, Yy1, Pias3, Plrg1, Aes, Cart1, Id3, Ctcf, Nfil3, Id4, Sfrs2                                                                                                                                                                                               | 312897, 24919, 83614, 60376, 29466, 25401, 25585, 83726, 114519, 291023, 494445                                                                                                                                                                                                           |
| phosphotransferase activity, alcohol group as acceptor | 0.00192443 | 34 | 20.18 | Bckdk, Phkg2, Igf1r, Pak1, Tesk1, Pink1_predicted, Rock2, Prkch, Prkag2, Met, Kcnh2, Prkab2, Src, Cdk9, Hipk3, Stk39, Acvr1, Dgkz, Matk, Csnk1g2, Dgkg, Tnk2, Gsk3b, Tssk2, MAST1, Pkn1, Btk, Prkcd, Bmpr1a, Fgfr1, Gprk6, Hk3, Il12b, Pip5k2b                           | 29603, 140671, 25718, 29431, 29460, 298575, 25537, 81749, 373545, 24553, 117018, 64562, 83805, 362110, 83617, 54348, 79558, 81821, 60450, 65278, 25666, 303882, 84027, 304181, 353118, 29355, 367901, 170538, 81507, 79114, 59076, 25060, 64546, 89812                                    |
| receptor binding                                       | 0.00205802 | 39 | 24.20 | Arrb1, Ncoa2, Faah, Sdcbp, Faf1, Npy, Cxcl12, Pdgfc, Ptpn1, Plcg1, A, Arfgef2, Grin1, Tra1_predicted, Tmpo, Nxph4, Socs2, Wnt4, Nppb, Nppa, Fgf12, Alcam, Clic6, Tradd, Glg1, Bcap31, Apln, Vegfc, Arf4, Wnt5a, Edn1, Mxd3, Inhba, Il12b, Timp2, Emp2, Grb2, Hcrt, Nxph3 | 25387, 83724, 29347, 83841, 140657, 24604, 24772, 79429, 24697, 25738, 24152, 296380, 24408, 362862, 25359, 59316, 84607, 84426, 25105, 24602, 170630, 79559, 304081, 246756, 29476, 293852, 58812, 114111, 79120, 64566, 24323, 252915, 29200, 64546, 29543, 360468, 81504, 25723, 59315 |
| protein kinase activity                                | 0.00210586 | 30 | 17.21 | Bckdk, Phkg2, Igf1r, Pak1, Tesk1, Pink1_predicted, Rock2, Prkch, Prkag2, Met, Kcnh2, Prkab2, Src, Cdk9, Hipk3, Stk39, Acvr1, Matk, Csnk1g2, Tnk2, Gsk3b, Tssk2, MAST1, Pkn1, Btk, Prkcd, Bmpr1a, Fgfr1, Gprk6, Il12b                                                     | 29603, 140671, 25718, 29431, 29460, 298575, 25537, 81749, 373545, 24553, 117018, 64562, 83805, 362110, 83617, 54348, 79558, 60450, 65278, 303882, 84027, 304181, 353118, 29355, 367901, 170538, 81507, 79114, 59076, 64546                                                                |
| channel regulator activity                             | 0.0039976  | 7  | 2.05  | Npy, Pias3, Lynx1_predicted, Hpcal4, Kcne1, Cacna2d3, Kcnmb1                                                                                                                                                                                                             | 24604, 83614, 300018, 50872, 25471, 306243, 29747                                                                                                                                                                                                                                         |
| kinase activity                                        | 0.00403022 | 35 | 21.93 | Bckdk, Phkg2, Igf1r, Pak1, Tesk1, Pink1_predicted, Rock2, Prkch, Prkag2, Met, Kcnh2, Prkab2, Src, Cdk9, Hipk3, Stk39, Acvr1, Dgkz, Matk, Csnk1g2, Dgkg, Tnk2, Gsk3b, Tssk2, MAST1, Pkn1, Btk, Prkcd, Bmpr1a, Fgfr1, Sephs1, Gprk6, Hk3, Il12b, Pip5k2b                   | 29603, 140671, 25718, 29431, 29460, 298575, 25537, 81749, 373545, 24553, 117018, 64562, 83805, 362110, 83617, 54348, 79558, 81821, 60450, 65278, 25666, 303882, 84027, 304181, 353118, 29355, 367901, 170538, 81507, 79114, 291314, 59076, 25060, 64546, 89812                            |
| phosphoric ester hydrolase activity                    | 0.00428906 | 19 | 9.79  | Pde3b, Pde2a, Pde8a, Pde4b, Alpl, Ppm1a, Ptpn12, Ppp3ca, Pde5a, Ptpn1, Plcg1, Pde11a, Phpt1_predicted, Nt5c1a_predicted, Ptpn11, Pdp2, Ppp2cb, Dusp4, Fbp1                                                                                                               | 29516, 81743, 308776, 24626, 25586, 24666, 117255, 24674, 171115, 24697, 25738, 140928, 296571, 313574, 25622, 246311, 24673, 60587, 24362                                                                                                                                                |
| bHLH transcription factor binding                      | 0.00546383 | 2  | 0.13  | Cdk9, Id3                                                                                                                                                                                                                                                                | 362110, 25585                                                                                                                                                                                                                                                                             |
| Hsp70/Hsc70 protein regulator activity                 | 0.00546383 | 2  | 0.13  | Bag3, Faf1                                                                                                                                                                                                                                                               | 293524, 140657                                                                                                                                                                                                                                                                            |
| SH3/SH2 adaptor activity                               | 0.00565451 | 5  | 1.18  | Gab2, Chn2, Chn1, Sh3bp5, Grb2                                                                                                                                                                                                                                           | 84477, 84031, 84030, 117186, 81504                                                                                                                                                                                                                                                        |

|                                             |            |    |      |                                                                              |                                                                           |
|---------------------------------------------|------------|----|------|------------------------------------------------------------------------------|---------------------------------------------------------------------------|
| carboxylic acid transporter activity        | 0.00565641 | 9  | 3.32 | Slc6a1, Slc6a11, Slc32a1, Slc12a8, Slc7a5, Slc7a3, Slc38a5, Slc25a1, Slc16a6 | 79212, 79213, 83612, 266733, 50719, 29485, 192208, 29743, 303772          |
| 3',5'-cyclic-AMP phosphodiesterase activity | 0.00570902 | 3  | 0.39 | Pde3b, Pde8a, Pde4b                                                          | 29516, 308776, 24626                                                      |
| organic acid transporter activity           | 0.00616508 | 9  | 3.36 | Slc6a1, Slc6a11, Slc32a1, Slc12a8, Slc7a5, Slc7a3, Slc38a5, Slc25a1, Slc16a6 | 79212, 79213, 83612, 266733, 50719, 29485, 192208, 29743, 303772          |
| auxiliary transport protein activity        | 0.00633787 | 7  | 2.23 | Npy, Pias3, Lynx1_predicted, Hpcal4, Kcne1, Cacna2d3, Kcnmb1                 | 24604, 83614, 300018, 50872, 25471, 306243, 29747                         |
| amino acid-polyamine transporter activity   | 0.00664153 | 5  | 1.22 | Slc6a1, Slc6a11, Slc32a1, Slc12a8, Slc7a3                                    | 79212, 79213, 83612, 266733, 29485                                        |
| polyamine transporter activity              | 0.00664153 | 5  | 1.22 | Slc6a1, Slc6a11, Slc32a1, Slc12a8, Slc7a3                                    | 79212, 79213, 83612, 266733, 29485                                        |
| potassium channel activity                  | 0.00775144 | 10 | 4.11 | Kcnh2, Kcnd3, Kcnh7, Grin1, Hcn2, Kcnq3, Grik3, Kcne1, Kcnmb1, Kcnh4         | 117018, 65195, 170739, 24408, 114244, 29682, 298521, 25471, 29747, 114032 |
| cation:amino acid symporter activity        | 0.00789334 | 3  | 0.44 | Slc6a1, Slc6a11, Slc32a1                                                     | 79212, 79213, 83612                                                       |
| amino acid transporter activity             | 0.00957145 | 7  | 2.40 | Slc6a1, Slc6a11, Slc32a1, Slc12a8, Slc7a5, Slc7a3, Slc38a5                   | 79212, 79213, 83612, 266733, 50719, 29485, 192208                         |

**GO category "cellular\_component"**

Number of genes annotated in GO: 391

Number of significant GO groups found: 30

| GO group             | p-value     | # genes (observed) | # genes (expected) | list of genes                                                                                                                                                                                                                                                                                                                                                                                                                                                                                                                                                                                                                                                 | GeneIDs                                                                                                                                                                                                                                                                                                                                                                                                                                                                                                                                                                                                                          |
|----------------------|-------------|--------------------|--------------------|---------------------------------------------------------------------------------------------------------------------------------------------------------------------------------------------------------------------------------------------------------------------------------------------------------------------------------------------------------------------------------------------------------------------------------------------------------------------------------------------------------------------------------------------------------------------------------------------------------------------------------------------------------------|----------------------------------------------------------------------------------------------------------------------------------------------------------------------------------------------------------------------------------------------------------------------------------------------------------------------------------------------------------------------------------------------------------------------------------------------------------------------------------------------------------------------------------------------------------------------------------------------------------------------------------|
| plasma membrane part | 1.17736e-05 | 84                 | 53.66              | Arrb1, Itgad, Ap2a2, Cd81, Picalm, Slc28a1, Igf1r, Pak1, Clcnkb, Sdcbbp, Faf1, Clta, Clcnk1, Gabrd, Eps15, Nrcam, Slc5a6, Adcy3, Cav2, Zfp384, Met, Grid2, Kcnh2, Negr1, Kcnd3, Notch2, Slc32a1, Vapb, Cd164, Cd24, Gja1, Cacnb4, Grin1, Cacna1b, Stk39, Calcrl, Rtn4rl2, Cd44, Slc34a3, Acvr1, Plec1, Hcn2, Vezt, Kcnq3, Has2, Grik3, Usp48, Mbp, P2rxl1, Alcam, Cxadr, Clcn2, Ifnar1_predicted, Kcne1, Cd47, Cd97, Slc12a4, Has3, Bcar1, Gnao, Bcap31, Cacna1f, Igsf1, Atp1b4, Gabra3, Slc9a3r1, Slc16a6, Lamp1, Cacna2d3, Ltts1, Fgfr1, B3gnt3_predicted, Ptch1, Axin1, Tmem8_predicted, Cacng4, Cltc, Cacnb1, Emp2, Cacna1g, Grin2a, Gabrb2, Clcn7, Kcnh4 | 25387, 64350, 81637, 25621, 89816, 116642, 25718, 29431, 79430, 83841, 140657, 83800, 79425, 29689, 313474, 497815, 170551, 64508, 363425, 171018, 24553, 79220, 117018, 59318, 65195, 29492, 83612, 60431, 83689, 25145, 24392, 58942, 24408, 257648, 54348, 25029, 311169, 25406, 246234, 79558, 64204, 114244, 299738, 29682, 25694, 298521, 362636, 24547, 25041, 79559, 89843, 29232, 288264, 25471, 29364, 361383, 29501, 266805, 25414, 50664, 293852, 114493, 302822, 84396, 24947, 59114, 303772, 25328, 306243, 266711, 79114, 290638, 89830, 79257, 303004, 140725, 54241, 50688, 360468, 29717, 24409, 25451, 29233, |



|                                       |             |    |       |                                                                                                                                                                                                                                                                                                                                                                                                                                                                                                                                                                                                                                                                                                                                                                            |                                                                                                                                                                                                                                                                                                                                                                                                                                                                                                                                                                                                                                                                                                                                               |
|---------------------------------------|-------------|----|-------|----------------------------------------------------------------------------------------------------------------------------------------------------------------------------------------------------------------------------------------------------------------------------------------------------------------------------------------------------------------------------------------------------------------------------------------------------------------------------------------------------------------------------------------------------------------------------------------------------------------------------------------------------------------------------------------------------------------------------------------------------------------------------|-----------------------------------------------------------------------------------------------------------------------------------------------------------------------------------------------------------------------------------------------------------------------------------------------------------------------------------------------------------------------------------------------------------------------------------------------------------------------------------------------------------------------------------------------------------------------------------------------------------------------------------------------------------------------------------------------------------------------------------------------|
|                                       |             |    |       |                                                                                                                                                                                                                                                                                                                                                                                                                                                                                                                                                                                                                                                                                                                                                                            | 114032                                                                                                                                                                                                                                                                                                                                                                                                                                                                                                                                                                                                                                                                                                                                        |
| cell fraction                         | 3.05354e-05 | 59 | 34.73 | Arrb1, Slc28a1, Clcnkb, Faah, Pde4b, Clcnk1, Ugcg, Slc5a6, Begain, Slc6a1, Met, Grid2, Kcnh2, Ppp3ca, Dlgap4, Cd164, Ndufs3_predicted, Ptges, Atp5g3, Lcn2, Cacnb4, Grin1, Stk39, Matk, Lynx1_predicted, Plec1, Tra1_predicted, Hcn2, Dgat1, Kcnq3, Cyp4f6, Ebna1bp2, Pafah2, Dlgap3, Casp9, Grik3, Atp2a2, Eif2b1, Alcam, Atp5j, Clcn2, Adcy5, Slc12a4, Bcar1, Gnao, Cyb5b, Gdi1, Slc16a6, Lamp1, Myo9b, Ppp2cb, Fgfr1, Edn1, Srd5a1, Sncb, Fbp1, Cacnb1, Cacna1g, Clcn7                                                                                                                                                                                                                                                                                                  | 25387, 116642, 79430, 29347, 24626, 79425, 83626, 170551, 79146, 79212, 24553, 79220, 117018, 24674, 286930, 83689, 295923, 59103, 114630, 170496, 58942, 24408, 54348, 60450, 300018, 64204, 362862, 114244, 84497, 29682, 266689, 114021, 313611, 286923, 58918, 298521, 29693, 64514, 79559, 94271, 29232, 64532, 29501, 25414, 50664, 80773, 25183, 303772, 25328, 25486, 24673, 79114, 24323, 24950, 113893, 24362, 50688, 29717, 29233                                                                                                                                                                                                                                                                                                  |
| plasma membrane                       | 6.09072e-05 | 98 | 68.07 | Arrb1, Itgad, Ap2a2, Cd81, Picalm, Slc28a1, Igf1r, Pak1, Clcnkb, Sdcbp, Faf1, Clta, Clcnk1, Gabrd, Eps15, Pdpn, Nrcam, Slc5a6, Adcy3, Cav2, Zfp384, Arf5, Met, Grid2, Tacr1, Kcnh2, Negr1, Unc5c, Kcnd3, Notch2, Slc32a1, Vapb, Cd164, Cd24, Gja1, Cacnb4, Grin1, Cacna1b, Stk39, Stxbp1, Calcr1, Rtn4r12, Cd44, Slc34a3, Acvr1, Lynx1_predicted, Plec1, Hcn2, Vezt, Kcnq3, Has2, Slc2a5, Grik3, Usp48, Trpv4, Mbp, P2rxl1, Alcam, Cxadr, Clcn2, Clic6, Ifnar1_predicted, Kcne1, Cd47, Adcy5, Rtn4r, Cd97, Slc12a4, Has3, Bcar1, Gnao, Slc7a5, Bcap31, Cacna1f, Igsf1, Atp1b4, Gabra3, Slc9a3r1, Slc16a6, Lamp1, Cacna2d3, Lzts1, Arf4, Fgfr1, Slc27a1, B3gnt3_predicted, Ptch1, Axin1, Tmem8_predicted, Cacng4, Cltc, Cacnb1, Emp2, Cacna1g, Grin2a, Gabrb2, Clcn7, Kcnh4 | 25387, 64350, 81637, 25621, 89816, 116642, 25718, 29431, 79430, 83841, 140657, 83800, 79425, 29689, 313474, 54320, 497815, 170551, 64508, 363425, 171018, 79117, 24553, 79220, 24807, 117018, 59318, 362049, 65195, 29492, 83612, 60431, 83689, 25145, 24392, 58942, 24408, 257648, 54348, 25558, 25029, 311169, 25406, 246234, 79558, 300018, 64204, 114244, 299738, 29682, 25694, 65197, 298521, 362636, 66026, 24547, 25041, 79559, 89843, 29232, 304081, 288264, 25471, 29364, 64532, 113912, 361383, 29501, 266805, 25414, 50664, 50719, 293852, 114493, 302822, 84396, 24947, 59114, 303772, 25328, 306243, 266711, 79120, 79114, 94172, 290638, 89830, 79257, 303004, 140725, 54241, 50688, 360468, 29717, 24409, 25451, 29233, 114032 |
| voltage-gated calcium channel complex | 8.49617e-05 | 7  | 1.12  | Cacnb4, Cacna1b, Cacna1f, Cacna2d3, Cacng4, Cacnb1, Cacna1g                                                                                                                                                                                                                                                                                                                                                                                                                                                                                                                                                                                                                                                                                                                | 58942, 257648, 114493, 306243, 140725, 50688, 29717                                                                                                                                                                                                                                                                                                                                                                                                                                                                                                                                                                                                                                                                                           |
| membrane fraction                     | 8.86912e-05 | 47 | 26.66 | Arrb1, Slc28a1, Clcnkb, Faah, Clcnk1, Ugcg, Slc5a6, Begain, Slc6a1, Met, Grid2, Kcnh2, Dlgap4, Cd164, Ndufs3_predicted, Ptges, Atp5g3, Cacnb4, Grin1, Stk39, Lynx1_predicted, Tra1_predicted, Hcn2, Dgat1, Kcnq3, Cyp4f6, Ebna1bp2, Dlgap3, Grik3, Atp2a2, Alcam, Atp5j, Clcn2, Adcy5, Slc12a4, Bcar1, Gnao, Cyb5b, Gdi1, Slc16a6, Lamp1, Fgfr1, Srd5a1, Sncb, Cacnb1, Cacna1g, Clcn7                                                                                                                                                                                                                                                                                                                                                                                      | 25387, 116642, 79430, 29347, 79425, 83626, 170551, 79146, 79212, 24553, 79220, 117018, 286930, 83689, 295923, 59103, 114630, 58942, 24408, 54348, 300018, 362862, 114244, 84497, 29682, 266689, 114021, 286923, 298521, 29693, 79559, 94271, 29232, 64532, 29501, 25414, 50664, 80773, 25183, 303772, 25328, 79114, 24950, 113893, 50688, 29717, 29233                                                                                                                                                                                                                                                                                                                                                                                        |
| cell projection                       | 0.000155013 | 30 | 14.71 | Pak1, Nrcam, Slc5a6, Slc6a1, Met, Akap3, Negr1, S100a6, Kcnd3, Plcg1, Fabp7, Grin1, Cacna1b, Slc34a3, Capzb, Dlgap3, Alcam, Tnk2, Clcn2, Bcar1, L1cam, Dnai2, Myo9b, Lzts1, Sncg, Sh3md2, Dbn1, Timp2, Cygb, Igf2bp1                                                                                                                                                                                                                                                                                                                                                                                                                                                                                                                                                       | 29431, 497815, 170551, 79212, 24553, 312720, 59318, 85247, 65195, 25738, 80841, 24408, 257648, 246234, 298584, 286923, 79559, 303882, 29232, 25414, 50687, 360654, 25486, 266711, 64347,                                                                                                                                                                                                                                                                                                                                                                                                                                                                                                                                                      |

|                    |             |     |        |                                                                                                                                                                                                                                                                                                                                                                                                                                                                                                                                                                                                                                                                                                                                                                                                                                                                                                                                                                                                                                                                                                                                                                                                                                                                                                                                                                                                                                                                                                                                                                                                                                                                                                                                                                                                                     |                                                                                                                                                                                                                                                                                                                                                                                                                                                                                                                                                                                                                                                                                                                                                                                                                                                                                                                                                                                                                                                                                                                                                                                                                                                                                                                                                                                                                                                                                                                                                                                                                                                                                                                   |
|--------------------|-------------|-----|--------|---------------------------------------------------------------------------------------------------------------------------------------------------------------------------------------------------------------------------------------------------------------------------------------------------------------------------------------------------------------------------------------------------------------------------------------------------------------------------------------------------------------------------------------------------------------------------------------------------------------------------------------------------------------------------------------------------------------------------------------------------------------------------------------------------------------------------------------------------------------------------------------------------------------------------------------------------------------------------------------------------------------------------------------------------------------------------------------------------------------------------------------------------------------------------------------------------------------------------------------------------------------------------------------------------------------------------------------------------------------------------------------------------------------------------------------------------------------------------------------------------------------------------------------------------------------------------------------------------------------------------------------------------------------------------------------------------------------------------------------------------------------------------------------------------------------------|-------------------------------------------------------------------------------------------------------------------------------------------------------------------------------------------------------------------------------------------------------------------------------------------------------------------------------------------------------------------------------------------------------------------------------------------------------------------------------------------------------------------------------------------------------------------------------------------------------------------------------------------------------------------------------------------------------------------------------------------------------------------------------------------------------------------------------------------------------------------------------------------------------------------------------------------------------------------------------------------------------------------------------------------------------------------------------------------------------------------------------------------------------------------------------------------------------------------------------------------------------------------------------------------------------------------------------------------------------------------------------------------------------------------------------------------------------------------------------------------------------------------------------------------------------------------------------------------------------------------------------------------------------------------------------------------------------------------|
|                    |             |     |        |                                                                                                                                                                                                                                                                                                                                                                                                                                                                                                                                                                                                                                                                                                                                                                                                                                                                                                                                                                                                                                                                                                                                                                                                                                                                                                                                                                                                                                                                                                                                                                                                                                                                                                                                                                                                                     | 306417, 81653, 29543, 170520, 303477                                                                                                                                                                                                                                                                                                                                                                                                                                                                                                                                                                                                                                                                                                                                                                                                                                                                                                                                                                                                                                                                                                                                                                                                                                                                                                                                                                                                                                                                                                                                                                                                                                                                              |
|                    |             |     |        |                                                                                                                                                                                                                                                                                                                                                                                                                                                                                                                                                                                                                                                                                                                                                                                                                                                                                                                                                                                                                                                                                                                                                                                                                                                                                                                                                                                                                                                                                                                                                                                                                                                                                                                                                                                                                     | 25387, 81637, 29603, 246255, 65031, 365371, 29431, 293524, 64573, 25332, 308761, 83724, 65158, 83841, 140657, 25566, 83800, 117548, 24626, 170724, 298103, 312897, 25492, 84354, 83626, 64830, 85425, 170551, 25537, 362776, 24919, 363425, 297486, 373545, 171018, 79117, 79431, 29167, 29179, 64314, 117018, 312720, 297727, 25664, 24718, 65029, 117255, 312682, 64562, 29739, 83824, 295230, 83614, 310633, 81635, 29563, 295270, 24674, 60376, 362051, 362039, 54321, 85247, 60565, 54284, 113922, 29492, 25738, 362280, 25735, 296321, 296380, 64550, 444985, 25524, 83689, 83471, 24392, 60329, 295923, 59103, 83619, 295701, 114630, 170496, 58942, 362087, 362110, 296651, 83617, 24408, 296709, 54348, 25558, 362138, 81821, 296571, 296499, 116633, 29466, 65151, 117107, 300052, 29497, 117152, 25401, 64204, 362862, 299857, 25578, 25359, 114031, 81805, 366854, 299810, 84607, 64186, 299805, 266689, 298584, 25585, 192110, 114021, 84426, 313611, 313574, 24602, 58918, 26759, 64304, 29693, 29533, 58945, 24817, 117030, 288753, 64514, 266766, 50551, 117099, 303882, 84027, 94271, 29232, 116563, 117259, 64532, 83726, 25414, 308913, 29476, 80773, 140941, 89842, 54267, 29355, 246311, 266601, 293852, 25611, 54252, 63879, 317413, 83712, 404280, 84396, 25106, 367901, 29743, 360654, 25328, 25486, 361176, 170538, 290551, 266711, 24673, 79120, 64347, 94172, 25402, 290553, 290851, 117186, 29416, 25531, 306862, 246209, 59328, 113893, 114519, 306817, 364680, 291318, 245957, 361202, 25697, 24362, 24438, 171455, 291103, 291023, 81653, 29543, 79257, 170520, 494445, 114861, 25345, 54241, 286970, 83833, 81504, 25723, 25574, 24917, 56029, 29282, 29754, 24159, 117056, 29510 |
| intracellular part | 0.000324736 | 222 | 188.55 | Arrb1, Ap2a2, Bckdk, Ppp2r2d, Doc2a, Tbx6_predicted, Pak1, Bag3, Trpc2, Mgmt, Prc1_predicted, Ncoa2, Rab2, Sdcbp, Faf1, Tmod1, Clta, Kif1b, Pde4b, Anp32b, Atp6v1g1_predicted, Msc_predicted, Nfia, Ssbp3, Ugcg, Unc13b, Tdrd7, Slc5a6, Rock2, Glrx5_predicted, Yy1, Cav2, Ppp4r2_predicted, Prkag2, Zfp384, Arf5, Bhlhb2, Dctn1, Syn2, Casp2, Kcnh2, Akap3, Mrps35_predicted, Pparg, Reln, Abp1, Ptpn12, Bcl2l13_predicted, Prkab2, Gclm, Cxxc4, Cct3, Pias3, Ubqln4_predicted, Adar, Crabp2, Sf3b4, Ppp3ca, Plrg1, Lmo4, Pla2g12a_predicted, Cnn3, S100a6, Syt6, Pitx2, Sep15, Notch2, Plcg1, Tcfap2c, Hnf4a, Bpi, Arfgef2, Top1, Dnmt3b, Psap, Cd164, Prep, Gja1, Neurog3, Ndufs3_predicted, Ptges, Nfe2l2, Tmx2, Atp5g3, Lcn2, Cacnb4, Ubacd1, Cdk9, Psmd5_predicted, Hipk3, Grin1, Rpl35, Stk39, Stxbp1, Rbms1, Dgkz, Phpt1_predicted, Dlx2, Akap8, Aes, Hrsp12, Zbtb7a, Vps28_predicted, Ptbp1, Cand1, Cart1, Plec1, Tra1_predicted, Shmt2, Ywhaz, Tmpo, Fstl3, Suox, Fbxo7, Yeats4_predicted, Socs2, Ascl1, Cnot2, Cyp4f6, Capzb, Id3, Pou3f1, Ebna1bp2, Wnt4, Pafah2, Nt5c1a_predicted, Nppa, Casp9, Acot7, Acads, Atp2a2, Pxmp2, Dynll1, Tcf1, Erp29, Diablo, Eif2b1, Dscr1, Txnrd2, Bdh1, Tnk2, Gsk3b, Atp5j, Clcn2, Ap2m1, Sfrs10, Adcy5, Ctcf, Bcar1, Egl1, Glg1, Cyb5b, Siah1a, Mbtps1, Maf, Pkn1, Pdp2, Tomm20, Bcap31, Otc, Mid1, Birc4, Morf4l2, Rbbp7, Mig12, Atp1b4, Rgn, Btk, Slc25a1, Dnai2, Lamp1, Myo9b, Upf3a, Prkcd, Chdh, Lzts1, Ppp2cb, Arf4, Sncg, Slc27a1, Casp3, Mustn1, Vps36_predicted, Sh3bp5, Aadat, Rab3a, Tcfap2a_predicted, Kif27, Smad5, Sncb, Nfil3, Dek, Barx1_predicted, Nmt2, Ddx46, Gkap1, Ctst, Fbp1, Hist1h1t, Exoc2, Uqcrrf1, Id4, Dbn1, Timp2, Axin1, Cygb, Sfrs2, Scpep1, Prm2, Cltc, Abca5, Smarcd2, Grb2, Hcrt, Ubtf, Kpn1, Snip, Rpl23, Atp5g1, Acly, H3f3b, Pctp |                                                                                                                                                                                                                                                                                                                                                                                                                                                                                                                                                                                                                                                                                                                                                                                                                                                                                                                                                                                                                                                                                                                                                                                                                                                                                                                                                                                                                                                                                                                                                                                                                                                                                                                   |
| neuron projection  | 0.000325642 | 18  | 7.25   | Pak1, Nrcam, Slc6a1, Negr1, Kcnd3, Plcg1, Grin1, Cacna1b, Dlgap3, Alcam, Tnk2, L1cam, Lzts1, Sncg, Dbn1, Timp2, Cygb, lgf2bp1                                                                                                                                                                                                                                                                                                                                                                                                                                                                                                                                                                                                                                                                                                                                                                                                                                                                                                                                                                                                                                                                                                                                                                                                                                                                                                                                                                                                                                                                                                                                                                                                                                                                                       | 29431, 497815, 79212, 59318, 65195, 25738, 24408, 257648, 286923, 79559, 303882, 50687, 266711, 64347, 81653, 29543, 170520, 303477                                                                                                                                                                                                                                                                                                                                                                                                                                                                                                                                                                                                                                                                                                                                                                                                                                                                                                                                                                                                                                                                                                                                                                                                                                                                                                                                                                                                                                                                                                                                                                               |
| protein complex    | 0.000831802 | 77  | 54.53  | P4ha3, Arrb1, Itgad, Ap2a2, Bckdk, Ppp2r2d, Sdcbp, Faf1, Atp6v1g1_predicted, Yy1, Prkag2, Dctn1, Kcnh2,                                                                                                                                                                                                                                                                                                                                                                                                                                                                                                                                                                                                                                                                                                                                                                                                                                                                                                                                                                                                                                                                                                                                                                                                                                                                                                                                                                                                                                                                                                                                                                                                                                                                                                             | 361612, 25387, 64350, 81637, 29603, 246255, 83841, 140657, 298103, 24919, 373545, 29167,                                                                                                                                                                                                                                                                                                                                                                                                                                                                                                                                                                                                                                                                                                                                                                                                                                                                                                                                                                                                                                                                                                                                                                                                                                                                                                                                                                                                                                                                                                                                                                                                                          |

|                              |             |     |        |                                                                                                                                                                                                                                                                                                                                                                                                                                                                                                                                                                                                                                                                                                                                                                                                                                                                                                                                                                                                                                                                                                                                                                                                                                       |                                                                                                                                                                                                                                                                                                                                                                                                                                                                                                                                                                                                                                                                                                                                                                                                                                                                                                                                     |
|------------------------------|-------------|-----|--------|---------------------------------------------------------------------------------------------------------------------------------------------------------------------------------------------------------------------------------------------------------------------------------------------------------------------------------------------------------------------------------------------------------------------------------------------------------------------------------------------------------------------------------------------------------------------------------------------------------------------------------------------------------------------------------------------------------------------------------------------------------------------------------------------------------------------------------------------------------------------------------------------------------------------------------------------------------------------------------------------------------------------------------------------------------------------------------------------------------------------------------------------------------------------------------------------------------------------------------------|-------------------------------------------------------------------------------------------------------------------------------------------------------------------------------------------------------------------------------------------------------------------------------------------------------------------------------------------------------------------------------------------------------------------------------------------------------------------------------------------------------------------------------------------------------------------------------------------------------------------------------------------------------------------------------------------------------------------------------------------------------------------------------------------------------------------------------------------------------------------------------------------------------------------------------------|
|                              |             |     |        | Mrps35_predicted, Pparg, Prkab2, Gclm, Cct3, Sf3b4, Ppp3ca, Lmo4, Pitx2, Tcfap2c, Hnf4a, Gja1, Ndufs3_predicted, Atp5g3, Cacnb4, Ubadc1, Cdk9, Psm5_predicted, Grin1, Rpl35, Cacna1b, Cd44, Acvr1, Ptbp1, Hcn2, Fbxo7, Kcnq3, Capzb, Grik3, Abcb9, Dynll1, Tcf1, Eif2b1, Kcne1, Gnao, Pdp2, Tomm20, Cacna1f, Otc, Mid1, Morf4l2, Rbbp7, Atp6ap1, Dnai2, Cacna2d3, Ppp2cb, Tcfap2a_predicted, Hist1h1t, Exoc2, Uqcrfs1, Ii12b, Cacng4, Sfrs2, Prm2, Cacnb1, Abca5, Smarcd2, Kpnb1, Rpl23, Cacna1g, Atp5g1, Acly, H3f3b, Kcnh4                                                                                                                                                                                                                                                                                                                                                                                                                                                                                                                                                                                                                                                                                                          | 117018, 297727, 25664, 64562, 29739, 295230, 295270, 24674, 362051, 54284, 362280, 25735, 24392, 295923, 114630, 58942, 362087, 362110, 296651, 24408, 296709, 257648, 25406, 79558, 29497, 114244, 366854, 29682, 298584, 298521, 63886, 58945, 24817, 64514, 25471, 50664, 246311, 266601, 114493, 25611, 54252, 317413, 83712, 83615, 360654, 306243, 24673, 306862, 24438, 171455, 291103, 64546, 140725, 494445, 25345, 50688, 286970, 83833, 24917, 29282, 29717, 29754, 24159, 117056, 114032                                                                                                                                                                                                                                                                                                                                                                                                                                |
| intrinsic to plasma membrane | 0.000908178 | 57  | 37.70  | Itgad, Cd81, Slc28a1, Igf1r, Clcnkb, Sdcbp, Clcnk1, Gabrd, Nrcam, Slc5a6, Adcy3, Cav2, Met, Grid2, Kcnh2, Negr1, Kcnd3, Notch2, Slc32a1, Vapb, Cd164, Cd24, Gja1, Grin1, Calcr, Rtn4rl2, Acvr1, Hcn2, Vezt, Kcnq3, Has2, Grik3, P2rxl1, Alcam, Clcn2, Ifnar1_predicted, Kcne1, Cd47, Cd97, Slc12a4, Has3, Bcap31, Igsf1, Atp1b4, Gabra3, Slc16a6, Lamp1, Fgfr1, B3gnt3_predicted, Ptch1, Tmem8_predicted, Cacng4, Emp2, Grin2a, Gabrb2, Clcn7, Kcnh4                                                                                                                                                                                                                                                                                                                                                                                                                                                                                                                                                                                                                                                                                                                                                                                  | 64350, 25621, 116642, 25718, 79430, 83841, 79425, 29689, 497815, 170551, 64508, 363425, 24553, 79220, 117018, 59318, 65195, 29492, 83612, 60431, 83689, 25145, 24392, 24408, 25029, 311169, 79558, 114244, 299738, 29682, 25694, 298521, 25041, 79559, 29232, 288264, 25471, 29364, 361383, 29501, 266805, 293852, 302822, 84396, 24947, 303772, 25328, 79114, 290638, 89830, 303004, 140725, 360468, 24409, 25451, 29233, 114032                                                                                                                                                                                                                                                                                                                                                                                                                                                                                                   |
| coated pit                   | 0.00102449  | 5   | 0.82   | Ap2a2, Picalm, Clta, Eps15, Cltc                                                                                                                                                                                                                                                                                                                                                                                                                                                                                                                                                                                                                                                                                                                                                                                                                                                                                                                                                                                                                                                                                                                                                                                                      | 81637, 89816, 83800, 313474, 54241                                                                                                                                                                                                                                                                                                                                                                                                                                                                                                                                                                                                                                                                                                                                                                                                                                                                                                  |
| cell soma                    | 0.00108534  | 10  | 3.15   | Negr1, Kcnd3, Fabp7, Cacna1b, Alcam, Tnk2, Cacna1f, Sncg, Timp2, Cygb                                                                                                                                                                                                                                                                                                                                                                                                                                                                                                                                                                                                                                                                                                                                                                                                                                                                                                                                                                                                                                                                                                                                                                 | 59318, 65195, 80841, 257648, 79559, 303882, 114493, 64347, 29543, 170520                                                                                                                                                                                                                                                                                                                                                                                                                                                                                                                                                                                                                                                                                                                                                                                                                                                            |
| intracellular                | 0.00125081  | 223 | 193.30 | Arrb1, Ap2a2, Bckdk, Ppp2r2d, Doc2a, Tbx6_predicted, Pak1, Bag3, Trpc2, Mgmt, Prc1_predicted, Ncoa2, Rab2, Sdcbp, Faf1, Tmod1, Clta, Kif1b, Pde4b, Anp32b, Atp6v1g1_predicted, Msc_predicted, Nfia, Ssbp3, Ugcg, Unc13b, Tdrd7, Slc5a6, Rock2, Glrx5_predicted, Yy1, Cav2, Ppp4r2_predicted, Prkag2, Zfp384, Arf5, Bhlhb2, Dctn1, Syn2, Casp2, Kcnh2, Akap3, Mrps35_predicted, Pparg, Reln, Abp1, Ptpn12, Bcl2l13_predicted, Prkab2, Gclm, Cxxc4, Cct3, Pias3, Ubqln4_predicted, Adar, Crabp2, Sf3b4, Ppp3ca, Plrg1, Lmo4, Pla2g12a_predicted, Cnn3, S100a6, Syt6, Pitx2, Sep15, Notch2, Plcg1, Tcfap2c, Hnf4a, Bpi, Arfgef2, Top1, Dnmt3b, Psap, Cd164, Prep, Gja1, Neurog3, Ndufs3_predicted, Ptges, Nfe2l2, Tmx2, Atp5g3, Lcn2, Cacnb4, Ubadc1, Cdk9, Psm5_predicted, Hipk3, Grin1, Rpl35, Stk39, Stxbp1, Rbms1, Dgkz, Phpt1_predicted, Dlx2, Akap8, Aes, Hrps12, Zbtb7a, Vps28_predicted, Ptbp1, Cand1, Cart1, Plec1, Tra1_predicted, Shmt2, Ywhaz, Tmpo, Fstl3, Suox, Fbxo7, Yeats4_predicted, Socs2, Ascl1, Cnot2, Cyp4f6, Capzb, Id3, Pou3f1, Ebna1bp2, Wnt4, Pafah2, Nt5c1a_predicted, Nppa, Casp9, Acot7, Acads, Atp2a2, Pxmp2, Dynll1, Tcf1, Erp29, Diablo, Eif2b1, Dscr1, Txnrd2, Lrrc15, Bdh1, Tnk2, Gsk3b, Atp5j, Clcn2, | 25387, 81637, 29603, 246255, 65031, 365371, 29431, 293524, 64573, 25332, 308761, 83724, 65158, 83841, 140657, 25566, 83800, 117548, 24626, 170724, 298103, 312897, 25492, 84354, 83626, 64830, 85425, 170551, 25537, 362776, 24919, 363425, 297486, 373545, 171018, 79117, 79431, 29167, 29179, 64314, 117018, 312720, 297727, 25664, 24718, 65029, 117255, 312682, 64562, 29739, 83824, 295230, 83614, 310633, 81635, 29563, 295270, 24674, 60376, 362051, 362039, 54321, 85247, 60565, 54284, 113922, 29492, 25738, 362280, 25735, 296321, 296380, 64550, 444985, 25524, 83689, 83471, 24392, 60329, 295923, 59103, 83619, 295701, 114630, 170496, 58942, 362087, 362110, 296651, 83617, 24408, 296709, 54348, 25558, 362138, 81821, 296571, 296499, 116633, 29466, 65151, 117107, 300052, 29497, 117152, 25401, 64204, 362862, 299857, 25578, 25359, 114031, 81805, 366854, 299810, 84607, 64186, 299805, 266689, 298584, 25585, |

|                          |            |     |        |                                                                                                                                                                                                                                                                                                                                                                                                                                                                                                                                                                                                                                                                                                                                                                                                                                                                                                                                                                                                                                                                                                                                                                                                                                                                                                                                       |                                                                                                                                                                                                                                                                                                                                                                                                                                                                                                                                                                                                                                                                                                                                                                                                                                                                                                                                                                                                                                                                                                                                                                                                                                     |
|--------------------------|------------|-----|--------|---------------------------------------------------------------------------------------------------------------------------------------------------------------------------------------------------------------------------------------------------------------------------------------------------------------------------------------------------------------------------------------------------------------------------------------------------------------------------------------------------------------------------------------------------------------------------------------------------------------------------------------------------------------------------------------------------------------------------------------------------------------------------------------------------------------------------------------------------------------------------------------------------------------------------------------------------------------------------------------------------------------------------------------------------------------------------------------------------------------------------------------------------------------------------------------------------------------------------------------------------------------------------------------------------------------------------------------|-------------------------------------------------------------------------------------------------------------------------------------------------------------------------------------------------------------------------------------------------------------------------------------------------------------------------------------------------------------------------------------------------------------------------------------------------------------------------------------------------------------------------------------------------------------------------------------------------------------------------------------------------------------------------------------------------------------------------------------------------------------------------------------------------------------------------------------------------------------------------------------------------------------------------------------------------------------------------------------------------------------------------------------------------------------------------------------------------------------------------------------------------------------------------------------------------------------------------------------|
|                          |            |     |        | Ap2m1, Sfrs10, Adcy5, Ctcf, Bcar1, Egln1, Glg1, Cyb5b, Siah1a, Mbtps1, Maf, Pkn1, Pdp2, Tomm20, Bcap31, Otc, Mid1, Birc4, Morf4l2, Rbbp7, Mig12, Atp1b4, Rgn, Btk, Slc25a1, Dnai2, Lamp1, Myo9b, Upf3a, Prkcd, Chdh, Lzts1, Ppp2cb, Arf4, Sncg, Slc27a1, Casp3, Mustn1, Vps36_predicted, Sh3bp5, Aadat, Rab3a, Tcfap2a_predicted, Kif27, Smad5, Sncb, Nfil3, Dek, Barx1_predicted, Nmt2, Ddx46, Gkap1, Ctst, Fbp1, Hist1h1t, Exoc2, Uqcrfs1, Id4, Dbn1, Timp2, Axin1, Cygb, Sfrs2, Scsep1, Prm2, Cltc, Abca5, Smarcd2, Grb2, Hcrt, Ubtf, Kpnb1, Snip, Rpl23, Atp5g1, Acly, H3f3b, Pctp                                                                                                                                                                                                                                                                                                                                                                                                                                                                                                                                                                                                                                                                                                                                                | 192110, 114021, 84426, 313611, 313574, 24602, 58918, 26759, 64304, 29693, 29533, 58945, 24817, 117030, 288753, 64514, 266766, 50551, 246296, 117099, 303882, 84027, 94271, 29232, 116563, 117259, 64532, 83726, 25414, 308913, 29476, 80773, 140941, 89842, 54267, 29355, 246311, 266601, 293852, 25611, 54252, 63879, 317413, 83712, 404280, 84396, 25106, 367901, 29743, 360654, 25328, 25486, 361176, 170538, 290551, 266711, 24673, 79120, 64347, 94172, 25402, 290553, 290851, 117186, 29416, 25531, 306862, 246209, 59328, 113893, 114519, 306817, 364680, 291318, 245957, 361202, 25697, 24362, 24438, 171455, 291103, 291023, 81653, 29543, 79257, 170520, 494445, 114861, 25345, 54241, 286970, 83833, 81504, 25723, 25574, 24917, 56029, 29282, 29754, 24159, 117056, 29510                                                                                                                                                                                                                                                                                                                                                                                                                                               |
| membrane-bound organelle | 0.00231531 | 161 | 134.20 | Ap2a2, Bckdk, Doc2a, Tbx6_predicted, Pak1, Trpc2, Mgmt, Prc1_predicted, Ncoa2, Rab2, Sdcbp, Faf1, Tmod1, Clta, Kif1b, Anp32b, Atp6v1g1_predicted, Msc_predicted, Nfia, Ssbp3, Unc13b, Tdrd7, Slc5a6, Glrx5_predicted, Yy1, Zfp384, Arf5, Bhlhb2, Syn2, Casp2, Kcnh2, Akap3, Mrps35_predicted, Pparg, Abp1, Bcl2l13_predicted, Cxxc4, Pias3, Ubqln4_predicted, Adar, Sf3b4, Plrg1, Lmo4, Pla2g12a_predicted, S100a6, Syt6, Pitx2, Sep15, Notch2, Tcfap2c, Hnf4a, Arfgef2, Top1, Dnmt3b, Psap, Cd164, Prep, Gja1, Neurog3, Ndufs3_predicted, Ptges, Nfe2l2, Tmx2, Atp5g3, Cdk9, Hipk3, Grin1, Stk39, Stxbp1, Rbms1, Dgkz, Dlx2, Akap8, Aes, Hrsp12, Zbtb7a, Vps28_predicted, Ptbp1, Cand1, Cart1, Tra1_predicted, Shmt2, Ywhaz, Tmpo, Fstl3, Suox, Yeats4_predicted, Ascl1, Cnot2, Cyp4f6, Id3, Pou3f1, Ebna1bp2, Wnt4, Nppa, Casp9, Acads, Atp2a2, Pxmp2, Tcf1, Erp29, Diablo, Dscr1, Txnrd2, Bdh1, Gsk3b, Atp5j, Ap2m1, Sfrs10, Ctcf, Glg1, Cyb5b, Siah1a, Mbtps1, Maf, Pkn1, Pdp2, Tomm20, Bcap31, Otc, Morf4l2, Rbbp7, Atp1b4, Rgn, Slc25a1, Dnai2, Lamp1, Upf3a, Chdh, Lzts1, Ppp2cb, Arf4, Mustn1, Vps36_predicted, Sh3bp5, Aadat, Rab3a, Tcfap2a_predicted, Smad5, Sncb, Nfil3, Dek, Barx1_predicted, Ddx46, Gkap1, Ctst, Hist1h1t, Id4, Timp2, Axin1, Sfrs2, Prm2, Cltc, Abca5, Smarcd2, Grb2, Hcrt, Ubtf, Kpnb1, Rpl23, Atp5g1 | 81637, 29603, 65031, 365371, 29431, 64573, 25332, 308761, 83724, 65158, 83841, 140657, 25566, 83800, 117548, 170724, 298103, 312897, 25492, 84354, 64830, 85425, 170551, 362776, 24919, 171018, 79117, 79431, 29179, 64314, 117018, 312720, 297727, 25664, 65029, 312682, 83824, 83614, 310633, 81635, 295270, 60376, 362051, 362039, 85247, 60565, 54284, 113922, 29492, 362280, 25735, 296380, 64550, 444985, 25524, 83689, 83471, 24392, 60329, 295923, 59103, 83619, 295701, 114630, 362110, 83617, 24408, 54348, 25558, 362138, 81821, 296499, 116633, 29466, 65151, 117107, 300052, 29497, 117152, 25401, 362862, 299857, 25578, 25359, 114031, 81805, 299810, 64186, 299805, 266689, 25585, 192110, 114021, 84426, 24602, 58918, 64304, 29693, 29533, 24817, 117030, 288753, 266766, 50551, 117099, 84027, 94271, 116563, 117259, 83726, 29476, 80773, 140941, 89842, 54267, 29355, 246311, 266601, 293852, 25611, 317413, 83712, 84396, 25106, 29743, 360654, 25328, 361176, 290551, 266711, 24673, 79120, 290553, 290851, 117186, 29416, 25531, 306862, 59328, 113893, 114519, 306817, 364680, 245957, 361202, 25697, 24438, 291023, 29543, 79257, 494445, 25345, 54241, 286970, 83833, 81504, 25723, 25574, 24917, 29282, |

|                                        |            |     |        |                                                                                                                                                                                                                                                                                                                                                                                                                                                                                                                                                                                                                                                                                  | 29754                                                                                                                                                                                                                                                                                                                                                                                                                                                                                                         |
|----------------------------------------|------------|-----|--------|----------------------------------------------------------------------------------------------------------------------------------------------------------------------------------------------------------------------------------------------------------------------------------------------------------------------------------------------------------------------------------------------------------------------------------------------------------------------------------------------------------------------------------------------------------------------------------------------------------------------------------------------------------------------------------|---------------------------------------------------------------------------------------------------------------------------------------------------------------------------------------------------------------------------------------------------------------------------------------------------------------------------------------------------------------------------------------------------------------------------------------------------------------------------------------------------------------|
| synapse                                | 0.00249997 | 12  | 4.70   | Arrb1, Dtnb, Syn2, Slc32a1, Dlgap4, Grin1, Dlgap3, Usp48, L1cam, Lzts1, Axin1, Grin2a                                                                                                                                                                                                                                                                                                                                                                                                                                                                                                                                                                                            | 25387, 362715, 29179, 83612, 286930, 24408, 286923, 362636, 50687, 266711, 79257, 24409                                                                                                                                                                                                                                                                                                                                                                                                                       |
| postsynaptic membrane                  | 0.00254957 | 6   | 1.42   | Arrb1, Dlgap4, Grin1, Dlgap3, Usp48, Grin2a                                                                                                                                                                                                                                                                                                                                                                                                                                                                                                                                                                                                                                      | 25387, 286930, 24408, 286923, 362636, 24409                                                                                                                                                                                                                                                                                                                                                                                                                                                                   |
| integral to plasma membrane            | 0.00296523 | 54  | 37.14  | Itgad, Cd81, Slc28a1, Igf1r, Clcnkb, Sdcbp, Clcnk1, Gabrd, Nrcam, Slc5a6, Adcy3, Cav2, Met, Grid2, Kcnh2, Kcnd3, Notch2, Slc32a1, Vapb, Cd164, Gja1, Grin1, Calcrl, Acvr1, Hcn2, Vezt, Kcnq3, Has2, Grik3, P2rxl1, Alcam, Clcn2, Ifnar1_predicted, Kcne1, Cd47, Cd97, Slc12a4, Has3, Bcap31, Igsf1, Atp1b4, Gabra3, Slc16a6, Lamp1, Fgfr1, B3gnt3_predicted, Ptch1, Tmem8_predicted, Cacng4, Emp2, Grin2a, Gabrb2, Clcn7, Kcnh4                                                                                                                                                                                                                                                  | 64350, 25621, 116642, 25718, 79430, 83841, 79425, 29689, 497815, 170551, 64508, 363425, 24553, 79220, 117018, 65195, 29492, 83612, 60431, 83689, 24392, 24408, 25029, 79558, 114244, 299738, 29682, 25694, 298521, 25041, 79559, 29232, 288264, 25471, 29364, 361383, 29501, 266805, 293852, 302822, 84396, 24947, 303772, 25328, 79114, 290638, 89830, 303004, 140725, 360468, 24409, 25451, 29233, 114032                                                                                                   |
| clathrin-coated vesicle                | 0.00320752 | 11  | 4.23   | Ap2a2, Doc2a, Clta, Syn2, Syt6, Grin1, Ap2m1, Siah1a, Rab3a, Cltc, Hcrt                                                                                                                                                                                                                                                                                                                                                                                                                                                                                                                                                                                                          | 81637, 65031, 83800, 29179, 60565, 24408, 116563, 140941, 25531, 54241, 25723                                                                                                                                                                                                                                                                                                                                                                                                                                 |
| clathrin coat of coated pit            | 0.00379289 | 3   | 0.35   | Ap2a2, Clta, Cltc                                                                                                                                                                                                                                                                                                                                                                                                                                                                                                                                                                                                                                                                | 81637, 83800, 54241                                                                                                                                                                                                                                                                                                                                                                                                                                                                                           |
| organelle lumen                        | 0.00379578 | 35  | 21.87  | Bckdk, Tdrd7, Yy1, Mrps35_predicted, Pparg, Lmo4, Pitx2, Sep15, Tcfap2c, Hnf4a, Ptges, Cdk9, Akap8, Ptbp1, Tra1_predicted, Suox, Yeats4_predicted, Ebna1bp2, Acads, Tcf1, Erp29, Bdh1, Atp5j, Mbtps1, Pdp2, Otc, Morf4l2, Rbbp7, Mustn1, Tcfap2a_predicted, Sfrs2, Prm2, Smarcd2, Ubtf, Rpl23                                                                                                                                                                                                                                                                                                                                                                                    | 29603, 85425, 24919, 297727, 25664, 362051, 54284, 113922, 362280, 25735, 59103, 362110, 116633, 29497, 362862, 81805, 299810, 114021, 64304, 24817, 117030, 117099, 94271, 89842, 246311, 25611, 317413, 83712, 290553, 306862, 494445, 25345, 83833, 25574, 29282                                                                                                                                                                                                                                           |
| membrane-enclosed lumen                | 0.00379578 | 35  | 21.87  | Bckdk, Tdrd7, Yy1, Mrps35_predicted, Pparg, Lmo4, Pitx2, Sep15, Tcfap2c, Hnf4a, Ptges, Cdk9, Akap8, Ptbp1, Tra1_predicted, Suox, Yeats4_predicted, Ebna1bp2, Acads, Tcf1, Erp29, Bdh1, Atp5j, Mbtps1, Pdp2, Otc, Morf4l2, Rbbp7, Mustn1, Tcfap2a_predicted, Sfrs2, Prm2, Smarcd2, Ubtf, Rpl23                                                                                                                                                                                                                                                                                                                                                                                    | 29603, 85425, 24919, 297727, 25664, 362051, 54284, 113922, 362280, 25735, 59103, 362110, 116633, 29497, 362862, 81805, 299810, 114021, 64304, 24817, 117030, 117099, 94271, 89842, 246311, 25611, 317413, 83712, 290553, 306862, 494445, 25345, 83833, 25574, 29282                                                                                                                                                                                                                                           |
| intracellular membrane-bound organelle | 0.00416968 | 159 | 134.03 | Ap2a2, Bckdk, Doc2a, Tbx6_predicted, Pak1, Trpc2, Mgmt, Prc1_predicted, Ncoa2, Rab2, Sdcbp, Faf1, Tmod1, Clta, Kif1b, Anp32b, Atp6v1g1_predicted, Msc_predicted, Nfia, Ssbp3, Unc13b, Tdrd7, Glrx5_predicted, Yy1, Zfp384, Arf5, Bhlhb2, Syn2, Casp2, Kcnh2, Akap3, Mrps35_predicted, Pparg, Abp1, Bcl2l13_predicted, Cxxc4, Pias3, Ubqln4_predicted, Adar, Sf3b4, Plrg1, Lmo4, Pla2g12a_predicted, S100a6, Syt6, Pitx2, Sep15, Notch2, Tcfap2c, Hnf4a, Arfgef2, Top1, Dnmt3b, Psap, Cd164, Prep, Gja1, Neurog3, Ndufs3_predicted, Ptges, Nfe2l2, Tmx2, Atp5g3, Cdk9, Hipk3, Grin1, Stk39, Stxbp1, Rbms1, Dgkz, Dlx2, Akap8, Aes, Hrsp12, Zbtb7a, Vps28_predicted, Ptbp1, Cand1, | 81637, 29603, 65031, 365371, 29431, 64573, 25332, 308761, 83724, 65158, 83841, 140657, 25566, 83800, 117548, 170724, 298103, 312897, 25492, 84354, 64830, 85425, 362776, 24919, 171018, 79117, 79431, 29179, 64314, 117018, 312720, 297727, 25664, 65029, 312682, 83824, 83614, 310633, 81635, 295270, 60376, 362051, 362039, 85247, 60565, 54284, 113922, 29492, 362280, 25735, 296380, 64550, 444985, 25524, 83689, 83471, 24392, 60329, 295923, 59103, 83619, 295701, 114630, 362110, 83617, 24408, 54348, |

|                         |            |     |        |                                                                                                                                                                                                                                                                                                                                                                                                                                                                                                                                                                                                                                                                                                                                                                                                                                                                                                                                       |                                                                                                                                                                                                                                                                                                                                                                                                                                                                                                                                                                                                                                                                                                                                                                                                                                                |
|-------------------------|------------|-----|--------|---------------------------------------------------------------------------------------------------------------------------------------------------------------------------------------------------------------------------------------------------------------------------------------------------------------------------------------------------------------------------------------------------------------------------------------------------------------------------------------------------------------------------------------------------------------------------------------------------------------------------------------------------------------------------------------------------------------------------------------------------------------------------------------------------------------------------------------------------------------------------------------------------------------------------------------|------------------------------------------------------------------------------------------------------------------------------------------------------------------------------------------------------------------------------------------------------------------------------------------------------------------------------------------------------------------------------------------------------------------------------------------------------------------------------------------------------------------------------------------------------------------------------------------------------------------------------------------------------------------------------------------------------------------------------------------------------------------------------------------------------------------------------------------------|
|                         |            |     |        | Cart1, Tra1_predicted, Shmt2, Ywhaz, Tmpo, Fstl3, Suox, Yeats4_predicted, Ascl1, Cnot2, Cyp4f6, Id3, Pou3f1, Ebna1bp2, Wnt4, Nppa, Casp9, Acads, Atp2a2, Pxmp2, Tcf1, Erp29, Diablo, Dscr1, Txnrd2, Bdh1, Gsk3b, Atp5j, Ap2m1, Sfrs10, Ctcf, Glg1, Cyb5b, Siah1a, Mbtps1, Maf, Pkn1, Pdp2, Tomm20, Bcap31, Otc, Morf4l2, Rbbp7, Atp1b4, Rgn, Slc25a1, Dnai2, Lamp1, Upf3a, Chdh, Lzts1, Ppp2cb, Arf4, Mustn1, Vps36_predicted, Sh3bp5, Aadat, Rab3a, Tcfap2a_predicted, Smad5, Sncb, Nfil3, Dek, Barx1_predicted, Ddx46, Gkap1, Ctstl, Hist1h1t, Id4, Timp2, Axin1, Sfrs2, Prm2, Cltc, Abca5, Smarcd2, Hcrt, Ubtf, Kpnb1, Rpl23, Atp5g1                                                                                                                                                                                                                                                                                               | 25558, 362138, 81821, 296499, 116633, 29466, 65151, 117107, 300052, 29497, 117152, 25401, 362862, 299857, 25578, 25359, 114031, 81805, 299810, 64186, 299805, 266689, 25585, 192110, 114021, 84426, 24602, 58918, 64304, 29693, 29533, 24817, 117030, 288753, 266766, 50551, 117099, 84027, 94271, 116563, 117259, 83726, 29476, 80773, 140941, 89842, 54267, 29355, 246311, 266601, 293852, 25611, 317413, 83712, 84396, 25106, 29743, 360654, 25328, 361176, 290551, 266711, 24673, 79120, 290553, 290851, 117186, 29416, 25531, 306862, 59328, 113893, 114519, 306817, 364680, 245957, 361202, 25697, 24438, 291023, 29543, 79257, 494445, 25345, 54241, 286970, 83833, 25723, 25574, 24917, 29282, 29754                                                                                                                                   |
|                         |            |     |        | Arrb1, Ap2a2, Bckdk, Ppp2r2d, Doc2a, Pak1, Bag3, Trpc2, Rab2, Faf1, Tmod1, Clta, Kif1b, Pde4b, Atp6v1g1_predicted, Unc13b, Tdrd7, Glrx5_predicted, Cav2, Ppp4r2_predicted, Arf5, Syn2, Mrps35_predicted, Pparg, Abp1, Ptpn12, Bcl2l13_predicted, Gclm, Cxxc4, Cct3, Ubqln4_predicted, Ppp3ca, Pla2g12a_predicted, Syt6, Sep15, Argef2, Psap, Cd164, Prep, Gja1, Ndufs3_predicted, Atp5g3, Cacnb4, Ubadc1, Grin1, Rpl35, Stxbp1, Phpt1_predicted, Vps28_predicted, Plec1, Tra1_predicted, Shmt2, Ywhaz, Fstl3, Suox, Cyp4f6, Capzb, Wnt4, Nt5c1a_predicted, Nppa, Casp9, Acot7, Acads, Atp2a2, Pxmp2, Erp29, Diablo, Eif2b1, Txnrd2, Bdh1, Gsk3b, Atp5j, Ap2m1, Egl1, Glg1, Cyb5b, Siah1a, Mbtps1, Pkn1, Pdp2, Tomm20, Bcap31, Otc, Btk, Slc25a1, Lamp1, Myo9b, Chdh, Ppp2cb, Arf4, Slc27a1, Casp3, Vps36_predicted, Sh3bp5, Aadat, Rab3a, Sncb, Gkap1, Ctstl, Fbp1, Exoc2, Axin1, Scep1, Cltc, Abca5, Hcrt, Rpl23, Atp5g1, Acly, Pctp | 25387, 81637, 29603, 246255, 65031, 29431, 293524, 64573, 65158, 140657, 25566, 83800, 117548, 24626, 298103, 64830, 85425, 362776, 363425, 297486, 79117, 29179, 297727, 25664, 65029, 117255, 312682, 29739, 83824, 295230, 310633, 24674, 362039, 60565, 113922, 296380, 25524, 83689, 83471, 24392, 295923, 114630, 58942, 362087, 24408, 296709, 25558, 296571, 300052, 64204, 362862, 299857, 25578, 114031, 81805, 266689, 298584, 84426, 313574, 24602, 58918, 26759, 64304, 29693, 29533, 117030, 288753, 64514, 50551, 117099, 84027, 94271, 116563, 308913, 29476, 80773, 140941, 89842, 29355, 246311, 266601, 293852, 25611, 367901, 29743, 25328, 25486, 290551, 24673, 79120, 94172, 25402, 290851, 117186, 29416, 25531, 113893, 361202, 25697, 24362, 171455, 79257, 114861, 54241, 286970, 25723, 29282, 29754, 24159, 29510 |
| cytoplasmic part        | 0.00422755 | 110 | 87.79  |                                                                                                                                                                                                                                                                                                                                                                                                                                                                                                                                                                                                                                                                                                                                                                                                                                                                                                                                       | 29347, 24626, 24674, 64204, 29232                                                                                                                                                                                                                                                                                                                                                                                                                                                                                                                                                                                                                                                                                                                                                                                                              |
| insoluble fraction      | 0.0053564  | 5   | 1.16   | Faah, Pde4b, Ppp3ca, Plec1, Clcn2                                                                                                                                                                                                                                                                                                                                                                                                                                                                                                                                                                                                                                                                                                                                                                                                                                                                                                     | 29347, 24626, 24674, 64204, 29232                                                                                                                                                                                                                                                                                                                                                                                                                                                                                                                                                                                                                                                                                                                                                                                                              |
| intracellular organelle | 0.00590317 | 178 | 153.57 | Ap2a2, Bckdk, Doc2a, Tbx6_predicted, Pak1, Trpc2, Mgmt, Prc1_predicted, Ncoa2, Rab2, Sdcbp, Faf1, Tmod1, Clta, Kif1b, Anp32b, Atp6v1g1_predicted, Msc_predicted, Nfia, Ssbp3, Unc13b, Tdrd7, Slc5a6, Rock2, Glrx5_predicted, Yy1, Ppp4r2_predicted, Zfp384, Arf5, Bhlhb2, Dctn1, Syn2, Casp2, Kcnh2, Akap3, Mrps35_predicted, Pparg, Abp1, Bcl2l13_predicted, Cxxc4, Pias3, Ubqln4_predicted, Adar, Sf3b4, Plrg1, Lmo4, Pla2g12a_predicted, Cnn3, S100a6, Syt6, Pitx2, Sep15, Notch2, Tcfap2c, Hnf4a, Argef2, Top1, Dnmt3b, Psap, Cd164, Prep, Gja1,                                                                                                                                                                                                                                                                                                                                                                                  | 81637, 29603, 65031, 365371, 29431, 64573, 25332, 308761, 83724, 65158, 83841, 140657, 25566, 83800, 117548, 170724, 298103, 312897, 25492, 84354, 64830, 85425, 170551, 25537, 362776, 24919, 297486, 171018, 79117, 79431, 29167, 29179, 64314, 117018, 312720, 297727, 25664, 65029, 312682, 83824, 83614, 310633, 81635, 295270, 60376, 362051, 362039, 54321, 85247, 60565, 54284, 113922, 29492, 362280, 25735                                                                                                                                                                                                                                                                                                                                                                                                                           |

|              |            |     |        |                                                                                                                                                                                                                                                                                                                                                                                                                                                                                                                                                                                                                                                                                                                                                                                                                                                                                                                                                                                                                                                                                                                                                                                                                                      |                                                                                                                                                                                                                                                                                                                                                                                                                                                                                                                                                                                                                                                                                                                                                                                                                                                                                                                                                   |
|--------------|------------|-----|--------|--------------------------------------------------------------------------------------------------------------------------------------------------------------------------------------------------------------------------------------------------------------------------------------------------------------------------------------------------------------------------------------------------------------------------------------------------------------------------------------------------------------------------------------------------------------------------------------------------------------------------------------------------------------------------------------------------------------------------------------------------------------------------------------------------------------------------------------------------------------------------------------------------------------------------------------------------------------------------------------------------------------------------------------------------------------------------------------------------------------------------------------------------------------------------------------------------------------------------------------|---------------------------------------------------------------------------------------------------------------------------------------------------------------------------------------------------------------------------------------------------------------------------------------------------------------------------------------------------------------------------------------------------------------------------------------------------------------------------------------------------------------------------------------------------------------------------------------------------------------------------------------------------------------------------------------------------------------------------------------------------------------------------------------------------------------------------------------------------------------------------------------------------------------------------------------------------|
|              |            |     |        | Neurog3, Ndufs3_predicted, Ptges, Nfe2l2, Tmx2, Atp5g3, Cdk9, Hipk3, Grin1, Rpl35, Stk39, Stxbp1, Rbms1, Dgkz, Dlx2, Akap8, Aes, Hrsp12, Zbtb7a, Vps28_predicted, Ptbp1, Cand1, Cart1, Tra1_predicted, Shmt2, Ywhaz, Tmpo, Fstl3, Suox, Yeats4_predicted, Ascl1, Cnot2, Cyp4f6, Capzb, Id3, Pou3f1, Ebna1bp2, Wnt4, Nppa, Casp9, Acads, Atp2a2, Pxmp2, Dynll1, Tcf1, Erp29, Diablo, Dscr1, Txnrd2, Bdh1, Gsk3b, Atp5j, Clcn2, Ap2m1, Sfrs10, Ctcf, Glg1, Cyb5b, Siah1a, Mbtps1, Maf, Pkn1, Pdp2, Tomm20, Bcap31, Otc, Mid1, Morf4l2, Rbbp7, Mig12, Atp1b4, Rgn, Btk, Slc25a1, Dnai2, Lamp1, Myo9b, Upf3a, Chdh, Lzts1, Ppp2cb, Arf4, Slc27a1, Mustn1, Vps36_predicted, Sh3bp5, Aadat, Rab3a, Tcfap2a_predicted, Kif27, Smad5, Sncb, Nfil3, Dek, Barx1_predicted, Ddx46, Gkap1, Ctst, Hist1h1t, Id4, Dbn1, Timp2, Axin1, Sfrs2, Prm2, Cltc, Abca5, Smarcd2, Grb2, Hcrt, Ubtf, Kpnb1, Snip, Rpl23, Atp5g1, H3f3b                                                                                                                                                                                                                                                                                                                       | 296380, 64550, 444985, 25524, 83689, 83471, 24392, 60329, 295923, 59103, 83619, 295701, 114630, 362110, 83617, 24408, 296709, 54348, 25558, 362138, 81821, 296499, 116633, 29466, 65151, 117107, 300052, 29497, 117152, 25401, 362862, 299857, 25578, 25359, 114031, 81805, 299810, 64186, 299805, 266689, 298584, 25585, 192110, 114021, 84426, 24602, 58918, 64304, 29693, 29533, 58945, 24817, 117030, 288753, 266766, 50551, 117099, 84027, 94271, 29232, 116563, 117259, 83726, 29476, 80773, 140941, 89842, 54267, 29355, 246311, 266601, 293852, 25611, 54252, 317413, 83712, 404280, 84396, 25106, 367901, 29743, 360654, 25328, 25486, 361176, 290551, 266711, 24673, 79120, 94172, 290553, 290851, 117186, 29416, 25531, 306862, 246209, 59328, 113893, 114519, 306817, 364680, 245957, 361202, 25697, 24438, 291023, 81653, 29543, 79257, 494445, 25345, 54241, 286970, 83833, 81504, 25723, 25574, 24917, 56029, 29282, 29754, 117056 |
| synapse part | 0.00591349 | 7   | 2.20   | Arrb1, Dlgap4, Grin1, Dlgap3, Usp48, L1cam, Grin2a                                                                                                                                                                                                                                                                                                                                                                                                                                                                                                                                                                                                                                                                                                                                                                                                                                                                                                                                                                                                                                                                                                                                                                                   | 25387, 286930, 24408, 286923, 362636, 50687, 24409                                                                                                                                                                                                                                                                                                                                                                                                                                                                                                                                                                                                                                                                                                                                                                                                                                                                                                |
| organelle    | 0.00622147 | 178 | 153.74 | Ap2a2, Bckdk, Doc2a, Tbx6_predicted, Pak1, Trpc2, Mgmt, Prc1_predicted, Ncoa2, Rab2, Sdcbp, Faf1, Tmod1, Clta, Kif1b, Anp32b, Atp6v1g1_predicted, Msc_predicted, Nfia, Ssbp3, Unc13b, Tdrd7, Slc5a6, Rock2, Glrx5_predicted, Yy1, Ppp4r2_predicted, Zfp384, Arf5, Bhlhb2, Dctn1, Syn2, Casp2, Kcnh2, Akap3, Mrps35_predicted, Pparg, Abp1, Bcl2l13_predicted, Cxxc4, Pias3, Ubqln4_predicted, Adar, Sf3b4, Plrg1, Lmo4, Pla2g12a_predicted, Cnn3, S100a6, Syt6, Pitx2, Sep15, Notch2, Tcfap2c, Hnf4a, Arfgef2, Top1, Dnmt3b, Psap, Cd164, Prep, Gja1, Neurog3, Ndufs3_predicted, Ptges, Nfe2l2, Tmx2, Atp5g3, Cdk9, Hipk3, Grin1, Rpl35, Stk39, Stxbp1, Rbms1, Dgkz, Dlx2, Akap8, Aes, Hrsp12, Zbtb7a, Vps28_predicted, Ptbp1, Cand1, Cart1, Tra1_predicted, Shmt2, Ywhaz, Tmpo, Fstl3, Suox, Yeats4_predicted, Ascl1, Cnot2, Cyp4f6, Capzb, Id3, Pou3f1, Ebna1bp2, Wnt4, Nppa, Casp9, Acads, Atp2a2, Pxmp2, Dynll1, Tcf1, Erp29, Diablo, Dscr1, Txnrd2, Bdh1, Gsk3b, Atp5j, Clcn2, Ap2m1, Sfrs10, Ctcf, Glg1, Cyb5b, Siah1a, Mbtps1, Maf, Pkn1, Pdp2, Tomm20, Bcap31, Otc, Mid1, Morf4l2, Rbbp7, Mig12, Atp1b4, Rgn, Btk, Slc25a1, Dnai2, Lamp1, Myo9b, Upf3a, Chdh, Lzts1, Ppp2cb, Arf4, Slc27a1, Mustn1, Vps36_predicted, Sh3bp5, | 81637, 29603, 65031, 365371, 29431, 64573, 25332, 308761, 83724, 65158, 83841, 140657, 25566, 83800, 117548, 170724, 298103, 312897, 25492, 84354, 64830, 85425, 170551, 25537, 362776, 24919, 297486, 171018, 79117, 79431, 29167, 29179, 64314, 117018, 312720, 297727, 25664, 65029, 312682, 83824, 83614, 310633, 81635, 295270, 60376, 362051, 362039, 54321, 85247, 60565, 54284, 113922, 29492, 362280, 25735, 296380, 64550, 444985, 25524, 83689, 83471, 24392, 60329, 295923, 59103, 83619, 295701, 114630, 362110, 83617, 24408, 296709, 54348, 25558, 362138, 81821, 296499, 116633, 29466, 65151, 117107, 300052, 29497, 117152, 25401, 362862, 299857, 25578, 25359, 114031, 81805, 299810, 64186, 299805, 266689, 298584, 25585, 192110, 114021, 84426, 24602, 58918, 64304, 29693, 29533, 58945, 24817, 117030, 288753, 266766, 50551, 117099, 84027, 94271, 29232, 116563, 117259, 83726, 29476, 80773, 140941,                  |

|                             |            |    |       |                                                                                                                                                                                                                                                       |                                                                                                                                                                                                                                                                                                                                                                                                                                        |
|-----------------------------|------------|----|-------|-------------------------------------------------------------------------------------------------------------------------------------------------------------------------------------------------------------------------------------------------------|----------------------------------------------------------------------------------------------------------------------------------------------------------------------------------------------------------------------------------------------------------------------------------------------------------------------------------------------------------------------------------------------------------------------------------------|
|                             |            |    |       | Aadat, Rab3a, Tcfap2a_predicted, Kif27, Smad5, Sncb, Nfil3, Dek, Barx1_predicted, Ddx46, Gkap1, Ctst, Hist1h1t, Id4, Dbn1, Timp2, Axin1, Sfrs2, Prm2, Cltc, Abca5, Smarcd2, Grb2, Hcrt, Ubtf, Kpnb1, Snip, Rpl23, Atp5g1, H3f3b                       | 89842, 54267, 29355, 246311, 266601, 293852, 25611, 54252, 317413, 83712, 404280, 84396, 25106, 367901, 29743, 360654, 25328, 25486, 361176, 290551, 266711, 24673, 79120, 94172, 290553, 290851, 117186, 29416, 25531, 306862, 246209, 59328, 113893, 114519, 306817, 364680, 245957, 361202, 25697, 24438, 291023, 81653, 29543, 79257, 494445, 25345, 54241, 286970, 83833, 81504, 25723, 25574, 24917, 56029, 29282, 29754, 117056 |
| endoplasmic reticulum lumen | 0.00644652 | 4  | 0.78  | Sep15, Tra1_predicted, Erp29, Mbtps1                                                                                                                                                                                                                  | 113922, 362862, 117030, 89842                                                                                                                                                                                                                                                                                                                                                                                                          |
| vesicle                     | 0.00767562 | 20 | 11.09 | Ap2a2, Doc2a, Clta, Slc5a6, Syn2, Cxzc4, Syt6, Grin1, Fstl3, Erp29, Ap2m1, Siah1a, Pkn1, Btk, Slc27a1, Rab3a, Axin1, Cltc, Grb2, Hcrt                                                                                                                 | 81637, 65031, 83800, 170551, 29179, 83824, 60565, 24408, 114031, 117030, 116563, 140941, 29355, 367901, 94172, 25531, 79257, 54241, 81504, 25723                                                                                                                                                                                                                                                                                       |
| cytosol                     | 0.00904637 | 28 | 17.47 | Arrb1, Ppp2r2d, Pak1, Bag3, Faf1, Pde4b, Pparg, Ptpn12, Cct3, Ubqln4_predicted, Ppp3ca, Arfgef2, Prep, Stxbp1, Phpt1_predicted, Vps28_predicted, Tra1_predicted, Suox, Nt5c1a_predicted, Casp9, Acot7, Gsk3b, Egl1, Ppp2cb, Casp3, Fbp1, Scpep1, Pctp | 25387, 246255, 29431, 293524, 140657, 24626, 25664, 117255, 295230, 310633, 24674, 296380, 83471, 25558, 296571, 300052, 362862, 81805, 313574, 58918, 26759, 84027, 308913, 24673, 25402, 24362, 114861, 29510                                                                                                                                                                                                                        |

**Extraction Options**

Selected elements with start/end ± bp  
 Complete sequence reverse complement  
 in FASTA format GenBank format

**Sequence Extraction**

**GeneID Extraction**

**Excel Extraction**

**Compare results**

**Enter GeneIDs**

(separated by spaces, returns, or commas)

**Further Evaluation of Matches**

**Search PubMed for**

**("gene name") AND**

(where "gene name" is automatically extracted from the description lines)

**Note:** This works only for annotated genomic DNA sequences from eukaryotes!



For [comments](#), questions, or bug reports, please contact [support@genomatix.de](mailto:support@genomatix.de).

---

© Genomatix Software GmbH 1998-2008 - All rights reserved.

GEMS Launcher 4.6.1

[License Agreement](#)
