# Supplementary material for: Comparison of Gene Expression Profile in Embryonic Mesencephalon and Neuronal Primary Cultures
Source: PubMed Central journal article supplement (PMC2654915; doi:10.1371/journal.pone.0004977), 2009-03-23
Supplement: pone.0004977.s006.pdf [file pone.0004977.s006.pdf]

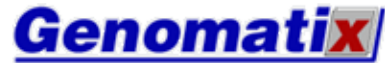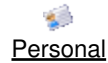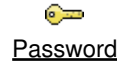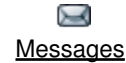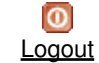

[LitInspector](#)
[GEMS Launcher](#)
[EIDorado](#)
[Gene2Promoter](#)
[MatBase](#)  
[FAQ](#)
[Projects](#)
[GenomatixPortal](#)
[Protocol](#)
[Help](#)

GEMS Launcher Task: *ModelInspector*: Search for user-defined models working on Rat Promoters

### Output overview of ModelInspector matches (788 matches)

go to: [ [Output overview](#) ] [ [Detailed output](#) ] [ [Statistics](#) ]

ModelInspector Release 5.5 February 2008

Wed May 28 11:10:54 2008

#### Solution parameters:

**Sequence file:** Rat Promoters  
**Models:** User-defined/neur-nr2f.model  
**Strand(s) searched:** both strands  
**Threshold for number of elements:** 100.0 % (2 of 2 elements)  
**Output sorted by:** match positions on the sequences  
**Maximum number of matches:** 1000

#### Match List:

| Sequence                                                                                                                                                                            | Model Name | Position         | Strand | Select Match |
|-------------------------------------------------------------------------------------------------------------------------------------------------------------------------------------|------------|------------------|--------|--------------|
| <b>GXP_1410473</b> [ <a href="#">GXP_1410473</a> ] (1 - 657)<br><b>Mrgprf</b> , GXL_703, GeneID: 266762, Rattus norvegicus chr. 1<br>MAS-related GPR, member F                      | neur-nr2f  | <u>6 - 120</u>   | (+)    |              |
| <b>GXP_1098</b> [ <a href="#">GXP_1098</a> ] (1 - 602)<br><b>Tacc2</b> , GXL_836, GeneID: 309025, Rattus norvegicus chr. 1<br>transforming, acidic coiled-coil containing protein 2 | neur-nr2f  | <u>209 - 336</u> | (+)    |              |
| <b>GXP_1115</b> [ <a href="#">GXP_1115</a> ] (1 - 602)<br><b>Spon1</b> , GXL_853, GeneID: 64456, Rattus norvegicus chr. 1                                                           | neur-nr2f  | <u>399 - 282</u> | (-)    |              |

spondin 1

|                                                                                                                                                                                                                    |                           |                           |     |
|--------------------------------------------------------------------------------------------------------------------------------------------------------------------------------------------------------------------|---------------------------|---------------------------|-----|
| <b>GXP_1409941</b> [ <a href="#">GXP_1409941</a> ] (1 - 604)<br><b>Pde2a</b> , GXL_980, GeneID: 81743, Rattus norvegicus chr. 1<br>phosphodiesterase 2A, cGMP-stimulated                                           | <a href="#">neur-nr2f</a> | <a href="#">303 - 440</a> | (+) |
| <b>GXP_1287</b> [ <a href="#">GXP_1287</a> ] (1 - 1290)<br><b>Tbx6_predicted</b> , GXL_1023, GeneID: 365371, Rattus norvegicus chr. 1<br>T-box 6 (predicted)                                                       | <a href="#">neur-nr2f</a> | <a href="#">878 - 736</a> | (-) |
| <b>GXP_1410268</b> [ <a href="#">GXP_1410268</a> ] (1 - 602)<br><b>Hsd3b7</b> , GXL_1036, GeneID: 246211, Rattus norvegicus chr. 1<br>hydroxy-delta-5-steroid dehydrogenase, 3 beta- and steroid delta-isomerase 7 | <a href="#">neur-nr2f</a> | <a href="#">460 - 326</a> | (-) |
| <b>GXP_1392</b> [ <a href="#">GXP_1392</a> ] (1 - 760)<br><b>Ctsc</b> , GXL_1127, GeneID: 25423, Rattus norvegicus chr. 1<br>cathepsin C                                                                           | <a href="#">neur-nr2f</a> | <a href="#">585 - 731</a> | (+) |
| <b>GXP_517844</b> [ <a href="#">GXP_517844</a> ] (1 - 601)<br><b>Cln6_predicted</b> , GXL_1194, GeneID: 295586, Rattus norvegicus chr. 5<br>chloride channel 6 (predicted)                                         | <a href="#">neur-nr2f</a> | <a href="#">553 - 427</a> | (-) |
| <b>GXP_1509</b> [ <a href="#">GXP_1509</a> ] (1 - 601)<br><b>Spink4</b> , GXL_1242, GeneID: 408233, Rattus norvegicus chr. 5<br>Kazal type serine protease inhibitor 4                                             | <a href="#">neur-nr2f</a> | <a href="#">406 - 547</a> | (+) |
| <b>GXP_1570</b> [ <a href="#">GXP_1570</a> ] (1 - 1176)<br><b>Ttc22_predicted</b> , GXL_1300, GeneID: 298300, Rattus norvegicus chr. 5<br>tetra-ricopeptide repeat domain 22 (predicted)                           | <a href="#">neur-nr2f</a> | <a href="#">308 - 158</a> | (-) |
| <b>GXP_1416132</b> [ <a href="#">GXP_1416132</a> ] (1 - 972)<br><b>Pde4b</b> , GXL_1405, GeneID: 24626, Rattus norvegicus chr. 5<br>phosphodiesterase 4B, cAMP specific                                            | <a href="#">neur-nr2f</a> | <a href="#">780 - 658</a> | (-) |
| <b>GXP_1416712</b> [ <a href="#">GXP_1416712</a> ] (1 - 601)<br><b>Tnfrsf1b</b> , GXL_1489, GeneID: 156767, Rattus norvegicus chr. 5<br>tumor necrosis factor receptor superfamily, member 1b                      | <a href="#">neur-nr2f</a> | <a href="#">205 - 59</a>  | (-) |
| <b>GXP_1416247</b> [ <a href="#">GXP_1416247</a> ] (1 - 602)<br><b>Pomgnt1</b> , GXL_1501, GeneID: 362567, Rattus norvegicus chr. 5<br>protein O-linked mannose beta1, 2-N-acetylglucosaminyltransferase           | <a href="#">neur-nr2f</a> | <a href="#">585 - 457</a> | (-) |
| <b>GXP_1417140</b> [ <a href="#">GXP_1417140</a> ] (1 - 602)<br><b>Myt1l</b> , GXL_10329, GeneID: 116668, Rattus norvegicus chr. 6<br>myelin transcription factor 1-like                                           | <a href="#">neur-nr2f</a> | <a href="#">125 - 243</a> | (+) |
| <b>GXP_1417109</b> [ <a href="#">GXP_1417109</a> ] (1 - 602)<br><b>Rock2</b> , GXL_10344, GeneID: 25537, Rattus norvegicus chr. 6<br>Rho-associated coiled-coil forming kinase 2                                   | <a href="#">neur-nr2f</a> | <a href="#">221 - 80</a>  | (-) |
| <b>GXP_1417114</b> [ <a href="#">GXP_1417114</a> ] (1 - 1184)<br><b>Hpcal1</b> , GXL_10377, GeneID: 50871, Rattus norvegicus chr. 6<br>hippocalcin-like 1                                                          | <a href="#">neur-nr2f</a> | <a href="#">299 - 449</a> | (+) |

|                                                                                                                                                                                                  |                           |                             |     |
|--------------------------------------------------------------------------------------------------------------------------------------------------------------------------------------------------|---------------------------|-----------------------------|-----|
| <b>GXP_1417023</b> [ <a href="#">GXP_1417023</a> ] (1 - 1012)<br><b>Zfp513</b> , GXL_10482, GeneID: 313913, Rattus norvegicus chr. 6<br>zinc finger protein 513                                  | <a href="#">neur-nr2f</a> | <a href="#">996 - 863</a>   | (-) |
| <b>GXP_1415315</b> [ <a href="#">GXP_1415315</a> ] (1 - 676)<br><b>M6pr</b> , GXL_15685, GeneID: 312689, Rattus norvegicus chr. 4<br>mannose-6-phosphate receptor, cation dependent              | <a href="#">neur-nr2f</a> | <a href="#">445 - 562</a>   | (+) |
| <b>GXP_19472</b> [ <a href="#">GXP_19472</a> ] (1 - 602)<br><b>Cntn4</b> , GXL_15731, GeneID: 116658, Rattus norvegicus chr. 4<br>contactin 4                                                    | <a href="#">neur-nr2f</a> | <a href="#">121 - 272</a>   | (+) |
| <b>GXP_1415355</b> [ <a href="#">GXP_1415355</a> ] (1 - 602)<br><b>Zfp384</b> , GXL_15781, GeneID: 171018, Rattus norvegicus chr. 4<br>zinc finger protein 384                                   | <a href="#">neur-nr2f</a> | <a href="#">144 - 10</a>    | (-) |
| <b>GXP_19668</b> [ <a href="#">GXP_19668</a> ] (1 - 601)<br><b>Fzd1</b> , GXL_15923, GeneID: 58868, Rattus norvegicus chr. 4<br>frizzled homolog 1 (Drosophila)                                  | <a href="#">neur-nr2f</a> | <a href="#">161 - 18</a>    | (-) |
| <b>GXP_1415164</b> [ <a href="#">GXP_1415164</a> ] (1 - 602)<br><b>Itpr1</b> , GXL_16011, GeneID: 25262, Rattus norvegicus chr. 4<br>inositol 1,4,5-triphosphate receptor 1                      | <a href="#">neur-nr2f</a> | <a href="#">327 - 192</a>   | (-) |
| <b>GXP_1414838</b> [ <a href="#">GXP_1414838</a> ] (1 - 602)<br><b>Scospondin</b> , GXL_16058, GeneID: 474348, Rattus norvegicus chr. 4<br>subcommissural organ spondin                          | <a href="#">neur-nr2f</a> | <a href="#">17 - 135</a>    | (+) |
| <b>GXP_1414941</b> [ <a href="#">GXP_1414941</a> ] (1 - 602)<br><b>Eif2ak3</b> , GXL_16068, GeneID: 29702, Rattus norvegicus chr. 4<br>eukaryotic translation initiation factor 2 alpha kinase 3 | <a href="#">neur-nr2f</a> | <a href="#">293 - 167</a>   | (-) |
| <b>GXP_1415331</b> [ <a href="#">GXP_1415331</a> ] (1 - 637)<br><b>C1rl</b> , GXL_16081, GeneID: 408246, Rattus norvegicus chr. 4<br>complement component 1, r subcomponent-like                 | <a href="#">neur-nr2f</a> | <a href="#">420 - 294</a>   | (-) |
| <b>GXP_19832</b> [ <a href="#">GXP_19832</a> ] (1 - 637)<br><b>Spsb2</b> , GXL_16086, GeneID: 297592, Rattus norvegicus chr. 4<br>splA/ryanodine receptor domain and SOCS box containing 2       | <a href="#">neur-nr2f</a> | <a href="#">243 - 116</a>   | (-) |
| <b>GXP_1415343</b> [ <a href="#">GXP_1415343</a> ] (1 - 1155)<br><b>Spsb2</b> , GXL_16086, GeneID: 297592, Rattus norvegicus chr. 4<br>splA/ryanodine receptor domain and SOCS box containing 2  | <a href="#">neur-nr2f</a> | <a href="#">879 - 757</a>   | (-) |
| <b>GXP_22689</b> [ <a href="#">GXP_22689</a> ] (1 - 1279)<br><b>St7l</b> , GXL_18704, GeneID: 295344, Rattus norvegicus chr. 2<br>suppression of tumorigenicity 7-like                           | <a href="#">neur-nr2f</a> | <a href="#">1167 - 1052</a> | (-) |
| <b>GXP_22786</b> [ <a href="#">GXP_22786</a> ] (1 - 605)<br><b>S100a11</b> , GXL_18800, GeneID: 445415, Rattus norvegicus chr. 2<br>S100 calcium binding protein A11 (calizzarin)                | <a href="#">neur-nr2f</a> | <a href="#">360 - 476</a>   | (+) |
|                                                                                                                                                                                                  | <a href="#">neur-nr2f</a> | <a href="#">395 - 250</a>   | (-) |

|                                                                                                                                                                                                       |                           |                             |     |
|-------------------------------------------------------------------------------------------------------------------------------------------------------------------------------------------------------|---------------------------|-----------------------------|-----|
| <b>GXP_1412808</b> [ <a href="#">GXP_1412808</a> ] (1 - 634)<br><b>Lmo4</b> , GXL_18834, GeneID: 362051, Rattus norvegicus chr. 2<br>LIM domain only 4                                                |                           |                             |     |
| <b>GXP_1412562</b> [ <a href="#">GXP_1412562</a> ] (1 - 602)<br><b>Kcnd3</b> , GXL_19014, GeneID: 65195, Rattus norvegicus chr. 2<br>potassium voltage gated channel, Shal-related family, member 3   | <a href="#">neur-nr2f</a> | <a href="#">236 - 369</a>   | (+) |
| <b>GXP_1412480</b> [ <a href="#">GXP_1412480</a> ] (1 - 602)<br><b>Notch2</b> , GXL_19017, GeneID: 29492, Rattus norvegicus chr. 2<br>notch gene homolog 2 (Drosophila)                               | <a href="#">neur-nr2f</a> | <a href="#">328 - 473</a>   | (+) |
| <b>GXP_1412321</b> [ <a href="#">GXP_1412321</a> ] (1 - 685)<br><b>Arhgef2</b> , GXL_19023, GeneID: 310635, Rattus norvegicus chr. 2<br>rho/rac guanine nucleotide exchange factor (GEF) 2            | <a href="#">neur-nr2f</a> | <a href="#">351 - 471</a>   | (+) |
| <b>GXP_25339</b> [ <a href="#">GXP_25339</a> ] (1 - 601)<br><b>Smgb</b> , GXL_20988, GeneID: 54303, Rattus norvegicus chr. 3<br>neonatal submandibular gland protein B                                | <a href="#">neur-nr2f</a> | <a href="#">24 - 170</a>    | (+) |
| <b>GXP_25362</b> [ <a href="#">GXP_25362</a> ] (1 - 1338)<br><b>Slc32a1</b> , GXL_21010, GeneID: 83612, Rattus norvegicus chr. 3<br>solute carrier family 32 (GABA vesicular transporter), member 1   | <a href="#">neur-nr2f</a> | <a href="#">1167 - 1038</a> | (-) |
| <b>GXP_25430</b> [ <a href="#">GXP_25430</a> ] (1 - 733)<br><b>Zgpat</b> , GXL_21078, GeneID: 296478, Rattus norvegicus chr. 3<br>zinc finger, CCCH-type with G patch domain                          | <a href="#">neur-nr2f</a> | <a href="#">244 - 397</a>   | (+) |
| <b>GXP_25462</b> [ <a href="#">GXP_25462</a> ] (1 - 929)<br><b>Bwk1</b> , GXL_21110, GeneID: 296466, Rattus norvegicus chr. 3<br>Bwk1 leukemia-related gene                                           | <a href="#">neur-nr2f</a> | <a href="#">501 - 626</a>   | (+) |
| <b>GXP_1414187</b> [ <a href="#">GXP_1414187</a> ] (1 - 675)<br><b>Dlgap4</b> , GXL_21115, GeneID: 286930, Rattus norvegicus chr. 3<br>discs, large homolog-associated protein 4 (Drosophila)         | <a href="#">neur-nr2f</a> | <a href="#">255 - 399</a>   | (+) |
| <b>GXP_1413623</b> [ <a href="#">GXP_1413623</a> ] (1 - 610)<br><b>Rcn1_predicted</b> , GXL_37424, GeneID: 362182, Rattus norvegicus chr. 3<br>reticulocalbin 1 (predicted)                           | <a href="#">neur-nr2f</a> | <a href="#">351 - 466</a>   | (+) |
| <b>GXP_45322</b> [ <a href="#">GXP_45322</a> ] (1 - 726)<br><b>Pscdbp</b> , GXL_37470, GeneID: 311047, Rattus norvegicus chr. 3<br>pleckstrin homology, Sec7 and coiled-coil domains, binding protein | <a href="#">neur-nr2f</a> | <a href="#">515 - 371</a>   | (-) |
| <b>GXP_45359</b> [ <a href="#">GXP_45359</a> ] (1 - 601)<br><b>Olr662_predicted</b> , GXL_37506, GeneID: 405948, Rattus norvegicus chr. 3<br>olfactory receptor 662 (predicted)                       | <a href="#">neur-nr2f</a> | <a href="#">249 - 96</a>    | (-) |
| <b>GXP_45387</b> [ <a href="#">GXP_45387</a> ] (1 - 1053)<br><b>C8g_predicted</b> , GXL_37533, GeneID: 296545, Rattus norvegicus chr. 3<br>complement component 8, gamma polypeptide (predicted)      | <a href="#">neur-nr2f</a> | <a href="#">850 - 725</a>   | (-) |
|                                                                                                                                                                                                       | <a href="#">neur-nr2f</a> | <a href="#">84 - 217</a>    | (+) |

|                                                                                                                                                                                               |                           |                           |     |
|-----------------------------------------------------------------------------------------------------------------------------------------------------------------------------------------------|---------------------------|---------------------------|-----|
| <b>GXP_1412908</b> [ <a href="#">GXP_1412908</a> ] (1 - 602)<br><b>Slc34a3</b> , GXL_37660, GeneID: 246234, Rattus norvegicus chr. 3<br>solute carrier family 34 (sodium phosphate), member 3 |                           |                           |     |
| <b>GXP_1413233</b> [ <a href="#">GXP_1413233</a> ] (1 - 602)<br><b>Acvr1</b> , GXL_37664, GeneID: 79558, Rattus norvegicus chr. 3<br>activin A receptor, type 1                               | <a href="#">neur-nr2f</a> | <a href="#">543 - 404</a> | (-) |
| <b>GXP_1413535</b> [ <a href="#">GXP_1413535</a> ] (1 - 602)<br><b>Cry2</b> , GXL_37674, GeneID: 170917, Rattus norvegicus chr. 3<br>cryptochrome 2 (photolyase-like)                         | <a href="#">neur-nr2f</a> | <a href="#">471 - 589</a> | (+) |
| <b>GXP_45580</b> [ <a href="#">GXP_45580</a> ] (1 - 706)<br><b>Ptgds</b> , GXL_37726, GeneID: 25526, Rattus norvegicus chr. 3<br>prostaglandin D2 synthase                                    | <a href="#">neur-nr2f</a> | <a href="#">234 - 88</a>  | (-) |
| <b>GXP_45606</b> [ <a href="#">GXP_45606</a> ] (1 - 601)<br><b>Olr552_predicted</b> , GXL_37752, GeneID: 405943, Rattus norvegicus chr. 3<br>olfactory receptor 552 (predicted)               | <a href="#">neur-nr2f</a> | <a href="#">646 - 517</a> | (-) |
| <b>GXP_52118</b> [ <a href="#">GXP_52118</a> ] (1 - 601)<br><b>Olr1078</b> , GXL_42857, GeneID: 299593, Rattus norvegicus chr. 7<br>olfactory receptor 1078                                   | <a href="#">neur-nr2f</a> | <a href="#">353 - 233</a> | (-) |
| <b>GXP_1169854</b> [ <a href="#">GXP_1169854</a> ] (1 - 601)<br><b>Map2k2</b> , GXL_42896, GeneID: 58960, Rattus norvegicus chr. 7<br>mitogen activated protein kinase kinase 2               | <a href="#">neur-nr2f</a> | <a href="#">507 - 381</a> | (-) |
| <b>GXP_1418378</b> [ <a href="#">GXP_1418378</a> ] (1 - 602)<br><b>Lynx1_predicted</b> , GXL_42911, GeneID: 300018, Rattus norvegicus chr. 7<br>Ly6/neurotoxin 1 (predicted)                  | <a href="#">neur-nr2f</a> | <a href="#">309 - 177</a> | (-) |
| <b>GXP_1169756</b> [ <a href="#">GXP_1169756</a> ] (1 - 601)<br><b>Mbc2</b> , GXL_43000, GeneID: 29579, Rattus norvegicus chr. 7<br>membrane bound C2 domain containing protein               | <a href="#">neur-nr2f</a> | <a href="#">328 - 449</a> | (+) |
| <b>GXP_52269</b> [ <a href="#">GXP_52269</a> ] (1 - 825)<br><b>Myf6</b> , GXL_43006, GeneID: 25714, Rattus norvegicus chr. 7<br>myogenic factor 6                                             | <a href="#">neur-nr2f</a> | <a href="#">108 - 238</a> | (+) |
| <b>GXP_52299</b> [ <a href="#">GXP_52299</a> ] (1 - 601)<br><b>Olr962_predicted</b> , GXL_43036, GeneID: 302045, Rattus norvegicus chr. 7<br>olfactory receptor 962 (predicted)               | <a href="#">neur-nr2f</a> | <a href="#">122 - 273</a> | (+) |
| <b>GXP_1417813</b> [ <a href="#">GXP_1417813</a> ] (1 - 603)<br><b>Eef2</b> , GXL_43134, GeneID: 29565, Rattus norvegicus chr. 7<br>eukaryotic translation elongation factor 2                | <a href="#">neur-nr2f</a> | <a href="#">195 - 346</a> | (+) |
| <b>GXP_52406</b> [ <a href="#">GXP_52406</a> ] (1 - 601)<br><b>Olr951_predicted</b> , GXL_43143, GeneID: 288879, Rattus norvegicus chr. 7<br>olfactory receptor 951 (predicted)               | <a href="#">neur-nr2f</a> | <a href="#">353 - 503</a> | (+) |
|                                                                                                                                                                                               | <a href="#">neur-nr2f</a> | <a href="#">195 - 346</a> | (+) |
|                                                                                                                                                                                               | <a href="#">neur-nr2f</a> | <a href="#">166 - 294</a> | (+) |

|                                                                                                                                                                                                           |                           |                           |     |
|-----------------------------------------------------------------------------------------------------------------------------------------------------------------------------------------------------------|---------------------------|---------------------------|-----|
| <b>GXP_52409</b> [ <a href="#">GXP_52409</a> ] (1 - 601)<br><b>Giot1</b> , GXL_43146, GeneID: 171090, Rattus norvegicus chr. 7<br>gonadotropin inducible ovarian transcription factor 1                   |                           |                           |     |
| <b>GXP_52430</b> [ <a href="#">GXP_52430</a> ] (1 - 606)<br><b>Fgf22</b> , GXL_43167, GeneID: 170579, Rattus norvegicus chr. 7<br>fibroblast growth factor 22                                             | <a href="#">neur-nr2f</a> | <a href="#">33 - 154</a>  | (+) |
| <b>GXP_1418278</b> [ <a href="#">GXP_1418278</a> ] (1 - 611)<br><b>Klf10</b> , GXL_43186, GeneID: 81813, Rattus norvegicus chr. 7<br>Kruppel-like factor 10                                               | <a href="#">neur-nr2f</a> | <a href="#">486 - 371</a> | (-) |
| <b>GXP_52471</b> [ <a href="#">GXP_52471</a> ] (1 - 603)<br><b>Rdh7</b> , GXL_43208, GeneID: 360420, Rattus norvegicus chr. 7<br>retinol dehydrogenase 7                                                  | <a href="#">neur-nr2f</a> | <a href="#">540 - 423</a> | (-) |
| <b>GXP_52531</b> [ <a href="#">GXP_52531</a> ] (1 - 721)<br><b>Olr908 predicted</b> , GXL_43268, GeneID: 288806, Rattus norvegicus chr. 7<br>olfactory receptor 908 (predicted)                           | <a href="#">neur-nr2f</a> | <a href="#">673 - 524</a> | (-) |
| <b>GXP_1417835</b> [ <a href="#">GXP_1417835</a> ] (1 - 602)<br><b>Csnk1g2</b> , GXL_43324, GeneID: 65278, Rattus norvegicus chr. 7<br>casein kinase 1, gamma 2                                           | <a href="#">neur-nr2f</a> | <a href="#">360 - 207</a> | (-) |
| <b>GXP_1416319</b> [ <a href="#">GXP_1416319</a> ] (1 - 601)<br><b>Slc2a1</b> , GXL_48346, GeneID: 24778, Rattus norvegicus chr. 5<br>solute carrier family 2 (facilitated glucose transporter), member 1 | <a href="#">neur-nr2f</a> | <a href="#">67 - 220</a>  | (+) |
| <b>GXP_59052</b> [ <a href="#">GXP_59052</a> ] (1 - 1110)<br><b>Pla2g2a</b> , GXL_48373, GeneID: 29692, Rattus norvegicus chr. 5<br>phospholipase A2, group IIA (platelets, synovial fluid)               | <a href="#">neur-nr2f</a> | <a href="#">701 - 566</a> | (-) |
| <b>GXP_1416352</b> [ <a href="#">GXP_1416352</a> ] (1 - 602)<br><b>Rims3</b> , GXL_48441, GeneID: 65025, Rattus norvegicus chr. 5<br>regulating synaptic membrane exocytosis 3                            | <a href="#">neur-nr2f</a> | <a href="#">297 - 159</a> | (-) |
| <b>GXP_1416731</b> [ <a href="#">GXP_1416731</a> ] (1 - 602)<br><b>Frap1</b> , GXL_48481, GeneID: 56718, Rattus norvegicus chr. 5<br>FK506 binding protein 12-rapamycin associated protein 1              | <a href="#">neur-nr2f</a> | <a href="#">233 - 104</a> | (-) |
| <b>GXP_59178</b> [ <a href="#">GXP_59178</a> ] (1 - 679)<br><b>Nt5c1a predicted</b> , GXL_48497, GeneID: 313574, Rattus norvegicus chr. 5<br>5'-nucleotidase, cytosolic IA (predicted)                    | <a href="#">neur-nr2f</a> | <a href="#">143 - 279</a> | (+) |
| <b>GXP_59197</b> [ <a href="#">GXP_59197</a> ] (1 - 601)<br><b>Olr858 predicted</b> , GXL_48516, GeneID: 366457, Rattus norvegicus chr. 5<br>olfactory receptor 858 (predicted)                           | <a href="#">neur-nr2f</a> | <a href="#">56 - 176</a>  | (+) |
| <b>GXP_59212</b> [ <a href="#">GXP_59212</a> ] (1 - 683)<br><b>Rpl22</b> , GXL_48531, GeneID: 81768, Rattus norvegicus chr. 5<br>ribosomal protein L22                                                    | <a href="#">neur-nr2f</a> | <a href="#">234 - 383</a> | (+) |
|                                                                                                                                                                                                           | <a href="#">neur-nr2f</a> | <a href="#">50 - 180</a>  | (+) |

|                                                                                                                                                                                                     |                           |                            |     |
|-----------------------------------------------------------------------------------------------------------------------------------------------------------------------------------------------------|---------------------------|----------------------------|-----|
| <b>GXP_59216</b> [ <a href="#">GXP_59216</a> ] (1 - 813)<br><b>Casp9</b> , GXL_48535, GeneID: 58918, Rattus norvegicus chr. 5<br>caspase 9                                                          |                           |                            |     |
| <b>GXP_59262</b> [ <a href="#">GXP_59262</a> ] (1 - 722)<br><b>Hes5</b> , GXL_48581, GeneID: 79225, Rattus norvegicus chr. 5<br>hairy and enhancer of split 5 (Drosophila)                          | <a href="#">neur-nr2f</a> | <a href="#">18 - 171</a>   | (+) |
| <b>GXP_59275</b> [ <a href="#">GXP_59275</a> ] (1 - 601)<br><b>Htr1d</b> , GXL_48594, GeneID: 25323, Rattus norvegicus chr. 5<br>5-hydroxytryptamine (serotonin) receptor 1D                        | <a href="#">neur-nr2f</a> | <a href="#">255 - 391</a>  | (+) |
| <b>GXP_1150227</b> [ <a href="#">GXP_1150227</a> ] (1 - 836)<br><b>Camkk2</b> , GXL_50823, GeneID: 83506, Rattus norvegicus chr. 12<br>calcium/calmodulin-dependent protein kinase kinase 2, beta   | <a href="#">neur-nr2f</a> | <a href="#">12 - 159</a>   | (+) |
| <b>GXP_1404535</b> [ <a href="#">GXP_1404535</a> ] (1 - 602)<br><b>Zcchc8 predicted</b> , GXL_50844, GeneID: 288661, Rattus norvegicus chr. 12<br>zinc finger, CCHC domain containing 8 (predicted) | <a href="#">neur-nr2f</a> | <a href="#">348 - 501</a>  | (+) |
| <b>GXP_61722</b> [ <a href="#">GXP_61722</a> ] (1 - 601)<br><b>Dynll1</b> , GXL_50869, GeneID: 58945, Rattus norvegicus chr. 12<br>dynein light chain LC8-type 1                                    | <a href="#">neur-nr2f</a> | <a href="#">47 - 184</a>   | (+) |
| <b>GXP_62880</b> [ <a href="#">GXP_62880</a> ] (1 - 740)<br><b>Cyb5</b> , GXL_52013, GeneID: 64001, Rattus norvegicus chr. 18<br>cytochrome b-5                                                     | <a href="#">neur-nr2f</a> | <a href="#">512 - 633</a>  | (+) |
| <b>GXP_1404013</b> [ <a href="#">GXP_1404013</a> ] (1 - 625)<br><b>Hrasls predicted</b> , GXL_60599, GeneID: 288025, Rattus norvegicus chr. 11<br>HRAS-like suppressor (predicted)                  | <a href="#">neur-nr2f</a> | <a href="#">531 - 408</a>  | (-) |
| <b>GXP_73072</b> [ <a href="#">GXP_73072</a> ] (1 - 601)<br><b>Tagln3</b> , GXL_60758, GeneID: 63837, Rattus norvegicus chr. 11<br>transgelin 3                                                     | <a href="#">neur-nr2f</a> | <a href="#">290 - 411</a>  | (+) |
| <b>GXP_852696</b> [ <a href="#">GXP_852696</a> ] (1 - 1236)<br><b>Tagln3</b> , GXL_60758, GeneID: 63837, Rattus norvegicus chr. 11<br>transgelin 3                                                  | <a href="#">neur-nr2f</a> | <a href="#">925 - 1046</a> | (+) |
| <b>GXP_73168</b> [ <a href="#">GXP_73168</a> ] (1 - 955)<br><b>Tnk2</b> , GXL_60853, GeneID: 303882, Rattus norvegicus chr. 11<br>tyrosine kinase, non-receptor, 2                                  | <a href="#">neur-nr2f</a> | <a href="#">20 - 146</a>   | (+) |
| <b>GXP_73215</b> [ <a href="#">GXP_73215</a> ] (1 - 839)<br><b>Clcn2</b> , GXL_60900, GeneID: 29232, Rattus norvegicus chr. 11<br>chloride channel 2                                                | <a href="#">neur-nr2f</a> | <a href="#">454 - 310</a>  | (-) |
| <b>GXP_1404086</b> [ <a href="#">GXP_1404086</a> ] (1 - 602)<br><b>Ap2m1</b> , GXL_60928, GeneID: 116563, Rattus norvegicus chr. 11<br>adaptor-related protein complex 2, mu 1 subunit              | <a href="#">neur-nr2f</a> | <a href="#">107 - 254</a>  | (+) |
|                                                                                                                                                                                                     | <a href="#">neur-nr2f</a> | <a href="#">131 - 280</a>  | (+) |

|                                                                                                                                                                                                                        |                           |                           |     |
|------------------------------------------------------------------------------------------------------------------------------------------------------------------------------------------------------------------------|---------------------------|---------------------------|-----|
| <b>GXP_73264</b> [ <a href="#">GXP_73264</a> ] (1 - 601)<br><b>Kcni6</b> , GXL_60949, GeneID: 25743, Rattus norvegicus chr. 11<br>potassium inwardly-rectifying channel, subfamily J, member 6                         |                           |                           |     |
| <b>GXP_73282</b> [ <a href="#">GXP_73282</a> ] (1 - 1260)<br><b>App3l</b> , GXL_60967, GeneID: 171415, Rattus norvegicus chr. 11<br>APG3 autophagy 3-like (S. cerevisiae)                                              | <a href="#">neur-nr2f</a> | <a href="#">233 - 109</a> | (-) |
| <b>GXP_1408669</b> [ <a href="#">GXP_1408669</a> ] (1 - 601)<br><b>Ldhd</b> , GXL_64768, GeneID: 307858, Rattus norvegicus chr. 19<br>lactate dehydrogenase D                                                          | <a href="#">neur-nr2f</a> | <a href="#">105 - 219</a> | (+) |
| <b>GXP_77867</b> [ <a href="#">GXP_77867</a> ] (1 - 666)<br><b>Mvd</b> , GXL_64813, GeneID: 81726, Rattus norvegicus chr. 19<br>mevalonate (diphospho) decarboxylase                                                   | <a href="#">neur-nr2f</a> | <a href="#">278 - 128</a> | (-) |
| <b>GXP_1408249</b> [ <a href="#">GXP_1408249</a> ] (1 - 601)<br><b>Gpr56</b> , GXL_64827, GeneID: 260326, Rattus norvegicus chr. 19<br>G protein-coupled receptor 56                                                   | <a href="#">neur-nr2f</a> | <a href="#">107 - 229</a> | (+) |
| <b>GXP_1156620</b> [ <a href="#">GXP_1156620</a> ] (1 - 601)<br><b>Abcb10</b> , GXL_65061, GeneID: 361439, Rattus norvegicus chr. 19<br>ATP-binding cassette, sub-family B (MDR/TAP), member 10                        | <a href="#">neur-nr2f</a> | <a href="#">420 - 541</a> | (+) |
| <b>GXP_1420866</b> [ <a href="#">GXP_1420866</a> ] (1 - 632)<br><b>Rbm10</b> , GXL_69286, GeneID: 64510, Rattus norvegicus chr. X<br>RNA binding motif protein 10                                                      | <a href="#">neur-nr2f</a> | <a href="#">196 - 347</a> | (+) |
| <b>GXP_1421012</b> [ <a href="#">GXP_1421012</a> ] (1 - 943)<br><b>Mid1</b> , GXL_69368, GeneID: 54252, Rattus norvegicus chr. X<br>midline 1                                                                          | <a href="#">neur-nr2f</a> | <a href="#">565 - 703</a> | (+) |
| <b>GXP_1420933</b> [ <a href="#">GXP_1420933</a> ] (1 - 601)<br><b>Syp</b> , GXL_69377, GeneID: 24804, Rattus norvegicus chr. X<br>synaptophysin                                                                       | <a href="#">neur-nr2f</a> | <a href="#">317 - 164</a> | (-) |
| <b>GXP_83490</b> [ <a href="#">GXP_83490</a> ] (1 - 648)<br><b>Phb</b> , GXL_69423, GeneID: 25344, Rattus norvegicus chr. X<br>prohibitin                                                                              | <a href="#">neur-nr2f</a> | <a href="#">324 - 448</a> | (+) |
| <b>GXP_83532</b> [ <a href="#">GXP_83532</a> ] (1 - 818)<br><b>Taf9l</b> , GXL_69464, GeneID: 171152, Rattus norvegicus chr. X<br>TAF9-like RNA polymerase II, TATA box binding protein (TBP)-associated factor, 31kDa | <a href="#">neur-nr2f</a> | <a href="#">587 - 469</a> | (-) |
| <b>GXP_83685</b> [ <a href="#">GXP_83685</a> ] (1 - 941)<br><b>Gyk</b> , GXL_69616, GeneID: 79223, Rattus norvegicus chr. X<br>glycerol kinase                                                                         | <a href="#">neur-nr2f</a> | <a href="#">428 - 279</a> | (-) |
| <b>GXP_1404122</b> [ <a href="#">GXP_1404122</a> ] (1 - 602)<br><b>Dgcr2</b> , GXL_86337, GeneID: 360742, Rattus norvegicus chr. 11<br>DiGeorge syndrome critical region gene 2                                        | <a href="#">neur-nr2f</a> | <a href="#">424 - 550</a> | (+) |
|                                                                                                                                                                                                                        | <a href="#">neur-nr2f</a> | <a href="#">56 - 204</a>  | (+) |



|                                                                                                                                                                                                 |                           |                           |     |
|-------------------------------------------------------------------------------------------------------------------------------------------------------------------------------------------------|---------------------------|---------------------------|-----|
| <b>GXP_107850</b> [ <a href="#">GXP_107850</a> ] (1 - 601)<br><b>Ppp1r3b</b> , GXL_90105, GeneID: 192280, Rattus norvegicus chr. 16<br>protein phosphatase 1, regulatory (inhibitor) subunit 3B |                           |                           |     |
| <b>GXP_1406866</b> [ <a href="#">GXP_1406866</a> ] (1 - 601)<br><b>Bpy2ip1_predicted</b> , GXL_90266, GeneID: 290640, Rattus norvegicus chr. 16<br>BPY2 interacting protein 1 (predicted)       | <a href="#">neur-nr2f</a> | <a href="#">513 - 386</a> | (-) |
| <b>GXP_1407186</b> [ <a href="#">GXP_1407186</a> ] (1 - 602)<br><b>Myr8</b> , GXL_90330, GeneID: 192253, Rattus norvegicus chr. 16<br>myosin heavy chain Myr 8                                  | <a href="#">neur-nr2f</a> | <a href="#">197 - 321</a> | (+) |
| <b>GXP_108116</b> [ <a href="#">GXP_108116</a> ] (1 - 659)<br><b>F10</b> , GXL_90366, GeneID: 29243, Rattus norvegicus chr. 16<br>coagulation factor X                                          | <a href="#">neur-nr2f</a> | <a href="#">124 - 244</a> | (+) |
| <b>GXP_855793</b> [ <a href="#">GXP_855793</a> ] (1 - 695)<br><b>F10</b> , GXL_90366, GeneID: 29243, Rattus norvegicus chr. 16<br>coagulation factor X                                          | <a href="#">neur-nr2f</a> | <a href="#">547 - 667</a> | (+) |
| <b>GXP_855343</b> [ <a href="#">GXP_855343</a> ] (1 - 601)<br><b>Wnt5a</b> , GXL_90368, GeneID: 64566, Rattus norvegicus chr. 16<br>wingless-type MMTV integration site 5A                      | <a href="#">neur-nr2f</a> | <a href="#">108 - 222</a> | (+) |
| <b>GXP_1406873</b> [ <a href="#">GXP_1406873</a> ] (1 - 602)<br><b>Rab3a</b> , GXL_90422, GeneID: 25531, Rattus norvegicus chr. 16<br>RAB3A, member RAS oncogene family                         | <a href="#">neur-nr2f</a> | <a href="#">507 - 362</a> | (-) |
| <b>GXP_1407422</b> [ <a href="#">GXP_1407422</a> ] (1 - 608)<br><b>Ctag3</b> , GXL_96153, GeneID: 306872, Rattus norvegicus chr. 17<br>cancer/testis antigen 3                                  | <a href="#">neur-nr2f</a> | <a href="#">98 - 212</a>  | (+) |
| <b>GXP_1154638</b> [ <a href="#">GXP_1154638</a> ] (1 - 603)<br><b>Scgn</b> , GXL_96238, GeneID: 306942, Rattus norvegicus chr. 17<br>secretagogin, EF-hand calcium binding protein             | <a href="#">neur-nr2f</a> | <a href="#">378 - 492</a> | (+) |
| <b>GXP_114959</b> [ <a href="#">GXP_114959</a> ] (1 - 632)<br><b>Testin</b> , GXL_96298, GeneID: 286916, Rattus norvegicus chr. 17<br>testin gene                                               | <a href="#">neur-nr2f</a> | <a href="#">7 - 160</a>   | (+) |
| <b>GXP_1154315</b> [ <a href="#">GXP_1154315</a> ] (1 - 601)<br><b>H2afy</b> , GXL_96319, GeneID: 29384, Rattus norvegicus chr. 17<br>H2A histone family, member Y                              | <a href="#">neur-nr2f</a> | <a href="#">520 - 403</a> | (-) |
| <b>GXP_1407672</b> [ <a href="#">GXP_1407672</a> ] (1 - 601)<br><b>Nmt2</b> , GXL_96381, GeneID: 291318, Rattus norvegicus chr. 17<br>N-myristoyltransferase 2                                  | <a href="#">neur-nr2f</a> | <a href="#">531 - 388</a> | (-) |
| <b>GXP_1407254</b> [ <a href="#">GXP_1407254</a> ] (1 - 1053)<br><b>Ntrk2</b> , GXL_96436, GeneID: 25054, Rattus norvegicus chr. 17<br>neurotrophic tyrosine kinase, receptor, type 2           | <a href="#">neur-nr2f</a> | <a href="#">247 - 375</a> | (+) |
|                                                                                                                                                                                                 | <a href="#">neur-nr2f</a> | <a href="#">134 - 268</a> | (+) |

|                                                                                                                                                                                                                        |                           |                           |     |
|------------------------------------------------------------------------------------------------------------------------------------------------------------------------------------------------------------------------|---------------------------|---------------------------|-----|
| <b>GXP_856110</b> [ <a href="#">GXP_856110</a> ] (1 - 601)<br><b>Inhba</b> , GXL_96480, GeneID: 29200, Rattus norvegicus chr. 17<br>inhibin beta-A                                                                     |                           |                           |     |
| <b>GXP_115183</b> [ <a href="#">GXP_115183</a> ] (1 - 602)<br><b>Fbp1</b> , GXL_96520, GeneID: 24362, Rattus norvegicus chr. 17<br>fructose-1,6- biphosphatase 1                                                       | <a href="#">neur-nr2f</a> | <a href="#">371 - 506</a> | (+) |
| <b>GXP_115906</b> [ <a href="#">GXP_115906</a> ] (1 - 746)<br><b>Stat3</b> , GXL_97163, GeneID: 25125, Rattus norvegicus chr. 10<br>signal transducer and activator of transcription 3                                 | <a href="#">neur-nr2f</a> | <a href="#">464 - 341</a> | (-) |
| <b>GXP_1403244</b> [ <a href="#">GXP_1403244</a> ] (1 - 602)<br><b>Stat3</b> , GXL_97163, GeneID: 25125, Rattus norvegicus chr. 10<br>signal transducer and activator of transcription 3                               | <a href="#">neur-nr2f</a> | <a href="#">383 - 233</a> | (-) |
| <b>GXP_115908</b> [ <a href="#">GXP_115908</a> ] (1 - 970)<br><b>Kcnmb1</b> , GXL_97165, GeneID: 29747, Rattus norvegicus chr. 10<br>potassium large conductance calcium-activated channel, subfamily M, beta member 1 | <a href="#">neur-nr2f</a> | <a href="#">779 - 642</a> | (-) |
| <b>GXP_115915</b> [ <a href="#">GXP_115915</a> ] (1 - 896)<br><b>Timp2</b> , GXL_97172, GeneID: 29543, Rattus norvegicus chr. 10<br>tissue inhibitor of metalloproteinase 2                                            | <a href="#">neur-nr2f</a> | <a href="#">405 - 264</a> | (-) |
| <b>GXP_115973</b> [ <a href="#">GXP_115973</a> ] (1 - 617)<br><b>Nme3</b> , GXL_97230, GeneID: 85269, Rattus norvegicus chr. 10<br>non-metastatic cell expressed protein 3                                             | <a href="#">neur-nr2f</a> | <a href="#">204 - 76</a>  | (-) |
| <b>GXP_115994</b> [ <a href="#">GXP_115994</a> ] (1 - 631)<br><b>Cd7 predicted</b> , GXL_97251, GeneID: 303747, Rattus norvegicus chr. 10<br>CD7 antigen (predicted)                                                   | <a href="#">neur-nr2f</a> | <a href="#">326 - 203</a> | (-) |
| <b>GXP_116049</b> [ <a href="#">GXP_116049</a> ] (1 - 601)<br><b>Olr1391 predicted</b> , GXL_97305, GeneID: 405983, Rattus norvegicus chr. 10<br>olfactory receptor 1391 (predicted)                                   | <a href="#">neur-nr2f</a> | <a href="#">78 - 213</a>  | (+) |
| <b>GXP_116064</b> [ <a href="#">GXP_116064</a> ] (1 - 709)<br><b>Prm2</b> , GXL_97320, GeneID: 25345, Rattus norvegicus chr. 10<br>protamine 2                                                                         | <a href="#">neur-nr2f</a> | <a href="#">536 - 394</a> | (-) |
| <b>GXP_116181</b> [ <a href="#">GXP_116181</a> ] (1 - 601)<br><b>Olr1389 predicted</b> , GXL_97437, GeneID: 287240, Rattus norvegicus chr. 10<br>olfactory receptor 1389 (predicted)                                   | <a href="#">neur-nr2f</a> | <a href="#">109 - 251</a> | (+) |
| <b>GXP_1403149</b> [ <a href="#">GXP_1403149</a> ] (1 - 1302)<br><b>Snip</b> , GXL_97503, GeneID: 56029, Rattus norvegicus chr. 10<br>SNAP25-interacting protein                                                       | <a href="#">neur-nr2f</a> | <a href="#">279 - 164</a> | (-) |
| <b>GXP_1154930</b> [ <a href="#">GXP_1154930</a> ] (1 - 611)<br><b>Sec61a2 predicted</b> , GXL_113296, GeneID: 361273, Rattus norvegicus chr. 17<br>Sec61, alpha subunit 2 (S. cerevisiae) (predicted)                 | <a href="#">neur-nr2f</a> | <a href="#">223 - 352</a> | (+) |
|                                                                                                                                                                                                                        | <a href="#">neur-nr2f</a> | <a href="#">263 - 381</a> | (+) |

|                                                                                                                                                                                                         |                           |                           |     |
|---------------------------------------------------------------------------------------------------------------------------------------------------------------------------------------------------------|---------------------------|---------------------------|-----|
| <b>GXP_1407649</b> [ <a href="#">GXP_1407649</a> ] (1 - 774)<br><b>Optn</b> , GXL_113321, GeneID: 246294, Rattus norvegicus chr. 17<br>optineurin                                                       |                           |                           |     |
| <b>GXP_498959</b> [ <a href="#">GXP_498959</a> ] (1 - 601)<br><b>Gabrg2</b> , GXL_123469, GeneID: 29709, Rattus norvegicus chr. 10<br>gamma-aminobutyric acid A receptor, gamma 2                       | <a href="#">neur-nr2f</a> | <a href="#">336 - 479</a> | (+) |
| <b>GXP_1402422</b> [ <a href="#">GXP_1402422</a> ] (1 - 601)<br><b>Maml1 predicted</b> , GXL_123472, GeneID: 303101, Rattus norvegicus chr. 10<br>mastermind like 1 (Drosophila) (predicted)            | <a href="#">neur-nr2f</a> | <a href="#">431 - 289</a> | (-) |
| <b>GXP_1402638</b> [ <a href="#">GXP_1402638</a> ] (1 - 602)<br><b>Ntn1</b> , GXL_123533, GeneID: 114523, Rattus norvegicus chr. 10<br>netrin 1                                                         | <a href="#">neur-nr2f</a> | <a href="#">154 - 31</a>  | (-) |
| <b>GXP_148227</b> [ <a href="#">GXP_148227</a> ] (1 - 937)<br><b>Rasd1</b> , GXL_123816, GeneID: 64455, Rattus norvegicus chr. 10<br>RAS, dexamethasone-induced 1                                       | <a href="#">neur-nr2f</a> | <a href="#">384 - 269</a> | (-) |
| <b>GXP_1402681</b> [ <a href="#">GXP_1402681</a> ] (1 - 1229)<br><b>Atp1b2</b> , GXL_123823, GeneID: 24214, Rattus norvegicus chr. 10<br>ATPase, Na+/K+ transporting, beta 2 polypeptide                | <a href="#">neur-nr2f</a> | <a href="#">675 - 799</a> | (+) |
| <b>GXP_148248</b> [ <a href="#">GXP_148248</a> ] (1 - 625)<br><b>Tekt1</b> , GXL_123837, GeneID: 85270, Rattus norvegicus chr. 10<br>tektin 1                                                           | <a href="#">neur-nr2f</a> | <a href="#">246 - 394</a> | (+) |
| <b>GXP_1402798</b> [ <a href="#">GXP_1402798</a> ] (1 - 604)<br><b>Srr</b> , GXL_123849, GeneID: 303306, Rattus norvegicus chr. 10<br>serine racemase                                                   | <a href="#">neur-nr2f</a> | <a href="#">554 - 407</a> | (-) |
| <b>GXP_1149704</b> [ <a href="#">GXP_1149704</a> ] (1 - 721)<br><b>Lnx2 predicted</b> , GXL_126533, GeneID: 360761, Rattus norvegicus chr. 12<br>ligand of numb-protein X 2 (predicted)                 | <a href="#">neur-nr2f</a> | <a href="#">345 - 195</a> | (-) |
| <b>GXP_1404249</b> [ <a href="#">GXP_1404249</a> ] (1 - 611)<br><b>Zfp655</b> , GXL_126553, GeneID: 360764, Rattus norvegicus chr. 12<br>zinc finger protein 655                                        | <a href="#">neur-nr2f</a> | <a href="#">391 - 516</a> | (+) |
| <b>GXP_1404659</b> [ <a href="#">GXP_1404659</a> ] (1 - 601)<br><b>Pxn</b> , GXL_126584, GeneID: 360820, Rattus norvegicus chr. 12<br>paxillin                                                          | <a href="#">neur-nr2f</a> | <a href="#">65 - 195</a>  | (+) |
| <b>GXP_1404421</b> [ <a href="#">GXP_1404421</a> ] (1 - 602)<br><b>Stx1a</b> , GXL_126642, GeneID: 116470, Rattus norvegicus chr. 12<br>syntaxin 1A (brain)                                             | <a href="#">neur-nr2f</a> | <a href="#">325 - 459</a> | (+) |
| <b>GXP_1404431</b> [ <a href="#">GXP_1404431</a> ] (1 - 609)<br><b>Gtf2ird1</b> , GXL_126645, GeneID: 246770, Rattus norvegicus chr. 12<br>general transcription factor II I repeat domain-containing 1 | <a href="#">neur-nr2f</a> | <a href="#">387 - 521</a> | (+) |
|                                                                                                                                                                                                         | <a href="#">neur-nr2f</a> | <a href="#">191 - 48</a>  | (-) |

|                                                                                                                                                                                                                     |                           |                           |     |
|---------------------------------------------------------------------------------------------------------------------------------------------------------------------------------------------------------------------|---------------------------|---------------------------|-----|
| <b>GXP_1404341</b> [ <a href="#">GXP_1404341</a> ] (1 - 649)<br><b>Zfand2a</b> , GXL_126777, GeneID: 360772, Rattus norvegicus chr. 12<br>zinc finger, AN1-type domain 2A                                           |                           |                           |     |
| <b>GXP_151955</b> [ <a href="#">GXP_151955</a> ] (1 - 1260)<br><b>Arhgef18 predicted</b> , GXL_126814, GeneID: 304193, Rattus norvegicus chr. 12<br>rho/rac guanine nucleotide exchange factor (GEF) 18 (predicted) | <a href="#">neur-nr2f</a> | <a href="#">535 - 654</a> | (+) |
| <b>GXP_1404383</b> [ <a href="#">GXP_1404383</a> ] (1 - 602)<br><b>Serpine1</b> , GXL_126862, GeneID: 24617, Rattus norvegicus chr. 12<br>serine (or cysteine) peptidase inhibitor, clade E, member 1               | <a href="#">neur-nr2f</a> | <a href="#">513 - 383</a> | (-) |
| <b>GXP_1403286</b> [ <a href="#">GXP_1403286</a> ] (1 - 602)<br><b>G6pc3</b> , GXL_135137, GeneID: 303565, Rattus norvegicus chr. 10<br>glucose 6 phosphatase, catalytic, 3                                         | <a href="#">neur-nr2f</a> | <a href="#">65 - 193</a>  | (+) |
| <b>GXP_1148361</b> [ <a href="#">GXP_1148361</a> ] (1 - 601)<br><b>Ramp2</b> , GXL_135154, GeneID: 58966, Rattus norvegicus chr. 10<br>receptor (calcitonin) activity modifying protein 2                           | <a href="#">neur-nr2f</a> | <a href="#">288 - 404</a> | (+) |
| <b>GXP_1403085</b> [ <a href="#">GXP_1403085</a> ] (1 - 602)<br><b>Lrrc59</b> , GXL_135159, GeneID: 287633, Rattus norvegicus chr. 10<br>leucine rich repeat containing 59                                          | <a href="#">neur-nr2f</a> | <a href="#">421 - 276</a> | (-) |
| <b>GXP_162553</b> [ <a href="#">GXP_162553</a> ] (1 - 695)<br><b>Ccl11</b> , GXL_135197, GeneID: 29397, Rattus norvegicus chr. 10<br>chemokine (C-C motif) ligand 11                                                | <a href="#">neur-nr2f</a> | <a href="#">415 - 281</a> | (-) |
| <b>GXP_162564</b> [ <a href="#">GXP_162564</a> ] (1 - 601)<br><b>Olr1408 predicted</b> , GXL_135208, GeneID: 405063, Rattus norvegicus chr. 10<br>olfactory receptor 1408 (predicted)                               | <a href="#">neur-nr2f</a> | <a href="#">250 - 134</a> | (-) |
| <b>GXP_1402852</b> [ <a href="#">GXP_1402852</a> ] (1 - 602)<br><b>Flot2</b> , GXL_135246, GeneID: 83764, Rattus norvegicus chr. 10<br>flotillin 2                                                                  | <a href="#">neur-nr2f</a> | <a href="#">374 - 260</a> | (-) |
| <b>GXP_162606</b> [ <a href="#">GXP_162606</a> ] (1 - 601)<br><b>Olr1439 predicted</b> , GXL_135250, GeneID: 287328, Rattus norvegicus chr. 10<br>olfactory receptor 1439 (predicted)                               | <a href="#">neur-nr2f</a> | <a href="#">573 - 438</a> | (-) |
| <b>GXP_162629</b> [ <a href="#">GXP_162629</a> ] (1 - 768)<br><b>Col23a1</b> , GXL_135273, GeneID: 353303, Rattus norvegicus chr. 10<br>procollagen, type XXIII, alpha 1                                            | <a href="#">neur-nr2f</a> | <a href="#">12 - 131</a>  | (+) |
| <b>GXP_1402710</b> [ <a href="#">GXP_1402710</a> ] (1 - 602)<br><b>Dlgh4</b> , GXL_135280, GeneID: 29495, Rattus norvegicus chr. 10<br>discs, large homolog 4 (Drosophila)                                          | <a href="#">neur-nr2f</a> | <a href="#">88 - 234</a>  | (+) |
| <b>GXP_162705</b> [ <a href="#">GXP_162705</a> ] (1 - 816)<br><b>Ccdc42 predicted</b> , GXL_135349, GeneID: 303234, Rattus norvegicus chr. 10<br>coiled-coil domain containing 42 (predicted)                       | <a href="#">neur-nr2f</a> | <a href="#">329 - 198</a> | (-) |
|                                                                                                                                                                                                                     | <a href="#">neur-nr2f</a> | <a href="#">161 - 32</a>  | (-) |

|                                                                                                                                                                                               |                           |                           |     |
|-----------------------------------------------------------------------------------------------------------------------------------------------------------------------------------------------|---------------------------|---------------------------|-----|
| <b>GXP_162809</b> [ <a href="#">GXP_162809</a> ] (1 - 601)<br><b>Olr1515 predicted</b> , GXL_135453, GeneID: 405994, Rattus norvegicus chr. 10<br>olfactory receptor 1515 (predicted)         |                           |                           |     |
| <b>GXP_162824</b> [ <a href="#">GXP_162824</a> ] (1 - 601)<br><b>Aoc3</b> , GXL_135468, GeneID: 29473, Rattus norvegicus chr. 10<br>amine oxidase, copper containing 3                        | <a href="#">neur-nr2f</a> | <a href="#">202 - 67</a>  | (-) |
| <b>GXP_168380</b> [ <a href="#">GXP_168380</a> ] (1 - 1433)<br><b>Lin7a</b> , GXL_140016, GeneID: 85327, Rattus norvegicus chr. 7<br>lin-7 homolog a (C. elegans)                             | <a href="#">neur-nr2f</a> | <a href="#">985 - 862</a> | (-) |
| <b>GXP_1418845</b> [ <a href="#">GXP_1418845</a> ] (1 - 601)<br><b>Nfe2</b> , GXL_140075, GeneID: 366998, Rattus norvegicus chr. 7<br>nuclear factor, erythroid derived 2                     | <a href="#">neur-nr2f</a> | <a href="#">359 - 210</a> | (-) |
| <b>GXP_168462</b> [ <a href="#">GXP_168462</a> ] (1 - 607)<br><b>Olr908 predicted</b> , GXL_140095, GeneID: 288806, Rattus norvegicus chr. 7<br>olfactory receptor 908 (predicted)            | <a href="#">neur-nr2f</a> | <a href="#">553 - 404</a> | (-) |
| <b>GXP_168463</b> [ <a href="#">GXP_168463</a> ] (1 - 763)<br><b>Wnt7b</b> , GXL_140096, GeneID: 315196, Rattus norvegicus chr. 7<br>wingless-related MMTV integration site 7B                | <a href="#">neur-nr2f</a> | <a href="#">272 - 150</a> | (-) |
| <b>GXP_168520</b> [ <a href="#">GXP_168520</a> ] (1 - 601)<br><b>Olr954 predicted</b> , GXL_140150, GeneID: 404938, Rattus norvegicus chr. 7<br>olfactory receptor 954 (predicted)            | <a href="#">neur-nr2f</a> | <a href="#">553 - 404</a> | (-) |
| <b>GXP_168538</b> [ <a href="#">GXP_168538</a> ] (1 - 742)<br><b>Gns</b> , GXL_140168, GeneID: 299825, Rattus norvegicus chr. 7<br>glucosamine (N-acetyl)-6-sulfatase                         | <a href="#">neur-nr2f</a> | <a href="#">363 - 240</a> | (-) |
| <b>GXP_168588</b> [ <a href="#">GXP_168588</a> ] (1 - 632)<br><b>Ela1</b> , GXL_140217, GeneID: 24331, Rattus norvegicus chr. 7<br>elastase 1, pancreatic                                     | <a href="#">neur-nr2f</a> | <a href="#">589 - 437</a> | (-) |
| <b>GXP_1418161</b> [ <a href="#">GXP_1418161</a> ] (1 - 601)<br><b>Grip1</b> , GXL_140323, GeneID: 84016, Rattus norvegicus chr. 7<br>glutamate receptor interacting protein 1                | <a href="#">neur-nr2f</a> | <a href="#">279 - 429</a> | (+) |
| <b>GXP_1169939</b> [ <a href="#">GXP_1169939</a> ] (1 - 601)<br><b>Prg-2</b> , GXL_140324, GeneID: 314614, Rattus norvegicus chr. 7<br>plasticity-related protein PRG-2                       | <a href="#">neur-nr2f</a> | <a href="#">314 - 432</a> | (+) |
| <b>GXP_1170976</b> [ <a href="#">GXP_1170976</a> ] (1 - 601)<br><b>Naga</b> , GXL_140329, GeneID: 315165, Rattus norvegicus chr. 7<br>N-acetyl galactosaminidase, alpha                       | <a href="#">neur-nr2f</a> | <a href="#">165 - 34</a>  | (-) |
| <b>GXP_168714</b> [ <a href="#">GXP_168714</a> ] (1 - 625)<br><b>Cyp2d22</b> , GXL_140343, GeneID: 171522, Rattus norvegicus chr. 7<br>cytochrome P450, family 2, subfamily d, polypeptide 22 | <a href="#">neur-nr2f</a> | <a href="#">110 - 248</a> | (+) |
|                                                                                                                                                                                               | <a href="#">neur-nr2f</a> | <a href="#">381 - 249</a> | (-) |

|                                                                                                                                                                                        |                           |                           |     |
|----------------------------------------------------------------------------------------------------------------------------------------------------------------------------------------|---------------------------|---------------------------|-----|
| <b>GXP_864217</b> [ <a href="#">GXP_864217</a> ] (1 - 601)<br><b>Faim2</b> , GXL_140350, GeneID: 246274, Rattus norvegicus chr. 7<br>Fas apoptotic inhibitory molecule 2               |                           |                           |     |
| <b>GXP_1421410</b> [ <a href="#">GXP_1421410</a> ] (1 - 602)<br><b>Avpr2</b> , GXL_142347, GeneID: 25108, Rattus norvegicus chr. X<br>arginine vasopressin receptor 2                  | <a href="#">neur-nr2f</a> | <a href="#">450 - 579</a> | (+) |
| <b>GXP_171217</b> [ <a href="#">GXP_171217</a> ] (1 - 686)<br><b>Acs14</b> , GXL_142383, GeneID: 113976, Rattus norvegicus chr. X<br>acyl-CoA synthetase long-chain family member 4    | <a href="#">neur-nr2f</a> | <a href="#">58 - 172</a>  | (+) |
| <b>GXP_171347</b> [ <a href="#">GXP_171347</a> ] (1 - 717)<br><b>Msn</b> , GXL_142511, GeneID: 81521, Rattus norvegicus chr. X<br>moesin                                               | <a href="#">neur-nr2f</a> | <a href="#">291 - 158</a> | (-) |
| <b>GXP_171438</b> [ <a href="#">GXP_171438</a> ] (1 - 667)<br><b>Fhl1</b> , GXL_142602, GeneID: 25177, Rattus norvegicus chr. X<br>four and a half LIM domains 1                       | <a href="#">neur-nr2f</a> | <a href="#">480 - 614</a> | (+) |
| <b>GXP_180104</b> [ <a href="#">GXP_180104</a> ] (1 - 601)<br><b>Olr392 predicted</b> , GXL_150703, GeneID: 405227, Rattus norvegicus chr. 2<br>olfactory receptor 392 (predicted)     | <a href="#">neur-nr2f</a> | <a href="#">253 - 391</a> | (+) |
| <b>GXP_180116</b> [ <a href="#">GXP_180116</a> ] (1 - 601)<br><b>Abcd3</b> , GXL_150715, GeneID: 25270, Rattus norvegicus chr. 2<br>ATP-binding cassette, sub-family D (ALD), member 3 | <a href="#">neur-nr2f</a> | <a href="#">112 - 237</a> | (+) |
| <b>GXP_180158</b> [ <a href="#">GXP_180158</a> ] (1 - 685)<br><b>Tpo1</b> , GXL_150756, GeneID: 170907, Rattus norvegicus chr. 2<br>developmentally regulated protein TPO1             | <a href="#">neur-nr2f</a> | <a href="#">168 - 21</a>  | (-) |
| <b>GXP_180201</b> [ <a href="#">GXP_180201</a> ] (1 - 755)<br><b>Gstm1</b> , GXL_150799, GeneID: 24423, Rattus norvegicus chr. 2<br>glutathione S-transferase, mu 1                    | <a href="#">neur-nr2f</a> | <a href="#">63 - 194</a>  | (+) |
| <b>GXP_180409</b> [ <a href="#">GXP_180409</a> ] (1 - 648)<br><b>Lhx8 predicted</b> , GXL_151005, GeneID: 365963, Rattus norvegicus chr. 2<br>LIM homeobox protein 8 (predicted)       | <a href="#">neur-nr2f</a> | <a href="#">451 - 585</a> | (+) |
| <b>GXP_182612</b> [ <a href="#">GXP_182612</a> ] (1 - 1071)<br><b>Kcnk4</b> , GXL_152771, GeneID: 116489, Rattus norvegicus chr. 1<br>potassium channel, subfamily K, member 4         | <a href="#">neur-nr2f</a> | <a href="#">226 - 366</a> | (+) |
| <b>GXP_182701</b> [ <a href="#">GXP_182701</a> ] (1 - 862)<br><b>Pola2</b> , GXL_152857, GeneID: 85242, Rattus norvegicus chr. 1<br>polymerase (DNA directed), alpha 2                 | <a href="#">neur-nr2f</a> | <a href="#">788 - 638</a> | (-) |
| <b>GXP_1410960</b> [ <a href="#">GXP_1410960</a> ] (1 - 601)<br><b>Ubtd1</b> , GXL_152913, GeneID: 309373, Rattus norvegicus chr. 1<br>ubiquitin domain containing 1                   | <a href="#">neur-nr2f</a> | <a href="#">413 - 271</a> | (-) |
|                                                                                                                                                                                        | <a href="#">neur-nr2f</a> | <a href="#">315 - 166</a> | (-) |

|                                                                                                                                                                                                               |                           |                            |     |
|---------------------------------------------------------------------------------------------------------------------------------------------------------------------------------------------------------------|---------------------------|----------------------------|-----|
| <b>GXP_182907</b> [ <a href="#">GXP_182907</a> ] (1 - 692)<br><b>Rps6kb2</b> , GXL_153056, GeneID: 361696, Rattus norvegicus chr. 1<br>ribosomal protein S6 kinase, polypeptide 2                             |                           |                            |     |
| <b>GXP_199062</b> [ <a href="#">GXP_199062</a> ] (1 - 601)<br><b>Fut4</b> , GXL_166082, GeneID: 60670, Rattus norvegicus chr. 8<br>fucosyltransferase 4                                                       | <a href="#">neur-nr2f</a> | <a href="#">345 - 226</a>  | (-) |
| <b>GXP_1419165</b> [ <a href="#">GXP_1419165</a> ] (1 - 602)<br><b>Tagln</b> , GXL_166283, GeneID: 25123, Rattus norvegicus chr. 8<br>transgelin                                                              | <a href="#">neur-nr2f</a> | <a href="#">126 - 6</a>    | (-) |
| <b>GXP_199366</b> [ <a href="#">GXP_199366</a> ] (1 - 1150)<br><b>Rbm7_predicted</b> , GXL_166382, GeneID: 315634, Rattus norvegicus chr. 8<br>RNA binding motif protein 7 (predicted)                        | <a href="#">neur-nr2f</a> | <a href="#">139 - 266</a>  | (+) |
| <b>GXP_199384</b> [ <a href="#">GXP_199384</a> ] (1 - 778)<br><b>Htr3b</b> , GXL_166400, GeneID: 58963, Rattus norvegicus chr. 8<br>5-hydroxytryptamine (serotonin) receptor 3b                               | <a href="#">neur-nr2f</a> | <a href="#">443 - 295</a>  | (-) |
| <b>GXP_199485</b> [ <a href="#">GXP_199485</a> ] (1 - 730)<br><b>Mapkapk3</b> , GXL_166500, GeneID: 315994, Rattus norvegicus chr. 8<br>mitogen-activated protein kinase-activated protein kinase 3           | <a href="#">neur-nr2f</a> | <a href="#">155 - 40</a>   | (-) |
| <b>GXP_1417322</b> [ <a href="#">GXP_1417322</a> ] (1 - 607)<br><b>Pygl</b> , GXL_168677, GeneID: 64035, Rattus norvegicus chr. 6<br>liver glycogen phosphorylase                                             | <a href="#">neur-nr2f</a> | <a href="#">449 - 600</a>  | (+) |
| <b>GXP_1417437</b> [ <a href="#">GXP_1417437</a> ] (1 - 638)<br><b>Slc8a3</b> , GXL_168702, GeneID: 140448, Rattus norvegicus chr. 6<br>solute carrier family 8 (sodium/calcium exchanger), member 3          | <a href="#">neur-nr2f</a> | <a href="#">392 - 538</a>  | (+) |
| <b>GXP_202183</b> [ <a href="#">GXP_202183</a> ] (1 - 758)<br><b>Abhd1</b> , GXL_168777, GeneID: 313917, Rattus norvegicus chr. 6<br>abhydrolase domain containing 1                                          | <a href="#">neur-nr2f</a> | <a href="#">735 - 615</a>  | (-) |
| <b>GXP_1417595</b> [ <a href="#">GXP_1417595</a> ] (1 - 1140)<br><b>Asb2</b> , GXL_168796, GeneID: 299266, Rattus norvegicus chr. 6<br>ankyrin repeat and SOCS box-containing protein 2                       | <a href="#">neur-nr2f</a> | <a href="#">948 - 1079</a> | (+) |
| <b>GXP_210792</b> [ <a href="#">GXP_210792</a> ] (1 - 754)<br><b>Atp4b</b> , GXL_175723, GeneID: 24217, Rattus norvegicus chr. 16<br>ATPase, H+/K+ exchanging, beta polypeptide                               | <a href="#">neur-nr2f</a> | <a href="#">221 - 374</a>  | (+) |
| <b>GXP_210890</b> [ <a href="#">GXP_210890</a> ] (1 - 765)<br><b>Fnta</b> , GXL_175819, GeneID: 25318, Rattus norvegicus chr. 16<br>farnesyltransferase, CAAX box, alpha                                      | <a href="#">neur-nr2f</a> | <a href="#">201 - 86</a>   | (-) |
| <b>GXP_1409792</b> [ <a href="#">GXP_1409792</a> ] (1 - 639)<br><b>Fsd2_predicted</b> , GXL_182573, GeneID: 308779, Rattus norvegicus chr. 1<br>fibronectin type III and SPRY domain containing 2 (predicted) | <a href="#">neur-nr2f</a> | <a href="#">232 - 117</a>  | (-) |
|                                                                                                                                                                                                               | <a href="#">neur-nr2f</a> | <a href="#">193 - 46</a>   | (-) |

|                                                                                                                                                                                                                     |                           |                           |     |
|---------------------------------------------------------------------------------------------------------------------------------------------------------------------------------------------------------------------|---------------------------|---------------------------|-----|
| <b>GXP_1409571</b> [ <a href="#">GXP_1409571</a> ] (1 - 611)<br><b>Emp3</b> , GXL_182635, GeneID: 81505, Rattus norvegicus chr. 1<br>epithelial membrane protein 3                                                  |                           |                           |     |
| <b>GXP_1409789</b> [ <a href="#">GXP_1409789</a> ] (1 - 705)<br><b>Ap3b2_predicted</b> , GXL_182715, GeneID: 308777, Rattus norvegicus chr. 1<br>adaptor-related protein complex 3, beta 2 subunit (predicted)      | <a href="#">neur-nr2f</a> | <a href="#">240 - 117</a> | (-) |
| <b>GXP_218744</b> [ <a href="#">GXP_218744</a> ] (1 - 602)<br><b>Grwd1</b> , GXL_182799, GeneID: 308592, Rattus norvegicus chr. 1<br>glutamate-rich WD repeat containing 1                                          | <a href="#">neur-nr2f</a> | <a href="#">348 - 481</a> | (+) |
| <b>GXP_218811</b> [ <a href="#">GXP_218811</a> ] (1 - 836)<br><b>Anpep</b> , GXL_182864, GeneID: 81641, Rattus norvegicus chr. 1<br>alanyl (membrane) aminopeptidase                                                | <a href="#">neur-nr2f</a> | <a href="#">201 - 342</a> | (+) |
| <b>GXP_218845</b> [ <a href="#">GXP_218845</a> ] (1 - 601)<br><b>Csrp3</b> , GXL_182898, GeneID: 117505, Rattus norvegicus chr. 1<br>cysteine and glycine-rich protein 3                                            | <a href="#">neur-nr2f</a> | <a href="#">281 - 165</a> | (-) |
| <b>GXP_218869</b> [ <a href="#">GXP_218869</a> ] (1 - 874)<br><b>Dbx1</b> , GXL_182921, GeneID: 292934, Rattus norvegicus chr. 1<br>developing brain homeobox 1                                                     | <a href="#">neur-nr2f</a> | <a href="#">62 - 195</a>  | (+) |
| <b>GXP_1409615</b> [ <a href="#">GXP_1409615</a> ] (1 - 601)<br><b>Dbx1</b> , GXL_182921, GeneID: 292934, Rattus norvegicus chr. 1<br>developing brain homeobox 1                                                   | <a href="#">neur-nr2f</a> | <a href="#">105 - 238</a> | (+) |
| <b>GXP_218877</b> [ <a href="#">GXP_218877</a> ] (1 - 621)<br><b>Inpp1</b> , GXL_182929, GeneID: 65038, Rattus norvegicus chr. 1<br>inositol polyphosphate phosphatase-like 1                                       | <a href="#">neur-nr2f</a> | <a href="#">515 - 370</a> | (-) |
| <b>GXP_1410215</b> [ <a href="#">GXP_1410215</a> ] (1 - 602)<br><b>Cln3</b> , GXL_182936, GeneID: 293485, Rattus norvegicus chr. 1<br>ceroid lipofuscinosis, neuronal 3, juvenile (Batten, Spielmeyer-Vogt disease) | <a href="#">neur-nr2f</a> | <a href="#">350 - 482</a> | (+) |
| <b>GXP_218894</b> [ <a href="#">GXP_218894</a> ] (1 - 616)<br><b>Cuzd1</b> , GXL_182946, GeneID: 117179, Rattus norvegicus chr. 1<br>CUB and zona pellucida-like domains 1                                          | <a href="#">neur-nr2f</a> | <a href="#">392 - 257</a> | (-) |
| <b>GXP_218944</b> [ <a href="#">GXP_218944</a> ] (1 - 710)<br><b>Prss8</b> , GXL_182996, GeneID: 192107, Rattus norvegicus chr. 1<br>protease, serine, 8 (prostasin)                                                | <a href="#">neur-nr2f</a> | <a href="#">273 - 138</a> | (-) |
| <b>GXP_224056</b> [ <a href="#">GXP_224056</a> ] (1 - 601)<br><b>H2-T18</b> , GXL_186879, GeneID: 406194, Rattus norvegicus chr. 20<br>histocompatibility 2, T region locus 18                                      | <a href="#">neur-nr2f</a> | <a href="#">384 - 255</a> | (-) |
| <b>GXP_224152</b> [ <a href="#">GXP_224152</a> ] (1 - 602)<br><b>Dpcr1</b> , GXL_186971, GeneID: 406199, Rattus norvegicus chr. 20<br>diffuse panbronchiolitis critical region gene 1                               | <a href="#">neur-nr2f</a> | <a href="#">22 - 155</a>  | (+) |
|                                                                                                                                                                                                                     | <a href="#">neur-nr2f</a> | <a href="#">467 - 314</a> | (-) |



|                                                                                                                                                                                                                                                      |                           |                           |     |
|------------------------------------------------------------------------------------------------------------------------------------------------------------------------------------------------------------------------------------------------------|---------------------------|---------------------------|-----|
| <b>GXP_1411172</b> [ <a href="#">GXP_1411172</a> ] (1 - 601)<br><b>Bat5</b> , GXL_187001, GeneID: 361796, Rattus norvegicus chr. 20<br>HLA-B associated transcript 5                                                                                 |                           |                           |     |
| <b>GXP_1160295</b> [ <a href="#">GXP_1160295</a> ] (1 - 601)<br><b>Notch4</b> , GXL_187032, GeneID: 406162, Rattus norvegicus chr. 20<br>Notch homolog 4                                                                                             | <a href="#">neur-nr2f</a> | <a href="#">58 - 184</a>  | (+) |
| <b>GXP_224244</b> [ <a href="#">GXP_224244</a> ] (1 - 601)<br><b>RT1-O</b> , GXL_187058, GeneID: 24751, Rattus norvegicus chr. 20<br>RT1 class Ib, locus H2-Q-like, grc region                                                                       | <a href="#">neur-nr2f</a> | <a href="#">388 - 272</a> | (-) |
| <b>GXP_224249</b> [ <a href="#">GXP_224249</a> ] (1 - 1009)<br><b>Gpsm3</b> , GXL_187063, GeneID: 406163, Rattus norvegicus chr. 20<br>G-protein signalling modulator 3 (AGS3-like, C. elegans)                                                      | <a href="#">neur-nr2f</a> | <a href="#">58 - 184</a>  | (+) |
| <b>GXP_224335</b> [ <a href="#">GXP_224335</a> ] (1 - 685)<br><b>Ltb</b> , GXL_187145, GeneID: 361795, Rattus norvegicus chr. 20<br>lymphotoxin B                                                                                                    | <a href="#">neur-nr2f</a> | <a href="#">174 - 288</a> | (+) |
| <b>GXP_864492</b> [ <a href="#">GXP_864492</a> ] (1 - 601)<br><b>Cdon</b> , GXL_188732, GeneID: 50938, Rattus norvegicus chr. 8<br>cell adhesion molecule-related/down-regulated by oncogenes                                                        | <a href="#">neur-nr2f</a> | <a href="#">405 - 264</a> | (-) |
| <b>GXP_226220</b> [ <a href="#">GXP_226220</a> ] (1 - 601)<br><b>Xtrp3</b> , GXL_188747, GeneID: 113918, Rattus norvegicus chr. 8<br>X transporter protein 3                                                                                         | <a href="#">neur-nr2f</a> | <a href="#">320 - 451</a> | (+) |
| <b>GXP_226284</b> [ <a href="#">GXP_226284</a> ] (1 - 601)<br><b>Olr1320_predicted</b> , GXL_188811, GeneID: 300621, Rattus norvegicus chr. 8<br>olfactory receptor 1320 (predicted)                                                                 | <a href="#">neur-nr2f</a> | <a href="#">308 - 181</a> | (-) |
| <b>GXP_1419268</b> [ <a href="#">GXP_1419268</a> ] (1 - 603)<br><b>Ireb2</b> , GXL_188845, GeneID: 64831, Rattus norvegicus chr. 8<br>iron responsive element binding protein 2                                                                      | <a href="#">neur-nr2f</a> | <a href="#">286 - 403</a> | (+) |
| <b>GXP_1419105</b> [ <a href="#">GXP_1419105</a> ] (1 - 881)<br><b>H2afx</b> , GXL_188941, GeneID: 300668, Rattus norvegicus chr. 8<br>dolichyl-phosphate (UDP-N-acetylglucosamine) N-acetylglucosaminophosphotransferase 1 (GlcNAc-1-P transferase) | <a href="#">neur-nr2f</a> | <a href="#">144 - 24</a>  | (-) |
| <b>GXP_229064</b> [ <a href="#">GXP_229064</a> ] (1 - 601)<br><b>Tgfb2</b> , GXL_190945, GeneID: 81809, Rattus norvegicus chr. 13<br>transforming growth factor, beta 2                                                                              | <a href="#">neur-nr2f</a> | <a href="#">174 - 317</a> | (+) |
| <b>GXP_1404764</b> [ <a href="#">GXP_1404764</a> ] (1 - 627)<br><b>Serpib2</b> , GXL_190950, GeneID: 60325, Rattus norvegicus chr. 13<br>serine (or cysteine) proteinase inhibitor, clade B, member 2                                                | <a href="#">neur-nr2f</a> | <a href="#">200 - 48</a>  | (-) |
| <b>GXP_229139</b> [ <a href="#">GXP_229139</a> ] (1 - 996)<br><b>Dpt_predicted</b> , GXL_191017, GeneID: 289178, Rattus norvegicus chr. 13<br>dermatopontin (predicted)                                                                              | <a href="#">neur-nr2f</a> | <a href="#">499 - 375</a> | (-) |
|                                                                                                                                                                                                                                                      | <a href="#">neur-nr2f</a> | <a href="#">449 - 315</a> | (-) |

|                                                                                                                                                                                                        |                           |                           |     |
|--------------------------------------------------------------------------------------------------------------------------------------------------------------------------------------------------------|---------------------------|---------------------------|-----|
| <b>GXP_229149</b> [ <a href="#">GXP_229149</a> ] (1 - 749)<br><b>Fvt1 predicted</b> , GXL_191027, GeneID: 360833, Rattus norvegicus chr. 13<br>follicular lymphoma variant translocation 1 (predicted) |                           |                           |     |
| <b>GXP_1404933</b> [ <a href="#">GXP_1404933</a> ] (1 - 622)<br><b>Csrp1</b> , GXL_191030, GeneID: 29276, Rattus norvegicus chr. 13<br>cysteine and glycine-rich protein 1                             | <a href="#">neur-nr2f</a> | <a href="#">429 - 575</a> | (+) |
| <b>GXP_1405337</b> [ <a href="#">GXP_1405337</a> ] (1 - 615)<br><b>Lbr</b> , GXL_191066, GeneID: 89789, Rattus norvegicus chr. 13<br>lamin B receptor                                                  | <a href="#">neur-nr2f</a> | <a href="#">430 - 576</a> | (+) |
| <b>GXP_1404916</b> [ <a href="#">GXP_1404916</a> ] (1 - 601)<br><b>Ptprv</b> , GXL_191067, GeneID: 64576, Rattus norvegicus chr. 13<br>protein tyrosine phosphatase, receptor type, V                  | <a href="#">neur-nr2f</a> | <a href="#">179 - 28</a>  | (-) |
| <b>GXP_1404899</b> [ <a href="#">GXP_1404899</a> ] (1 - 602)<br><b>Klhl12</b> , GXL_191190, GeneID: 266772, Rattus norvegicus chr. 13<br>kelch-like 12 (Drosophila)                                    | <a href="#">neur-nr2f</a> | <a href="#">82 - 220</a>  | (+) |
| <b>GXP_1404957</b> [ <a href="#">GXP_1404957</a> ] (1 - 602)<br><b>Lhx9</b> , GXL_191240, GeneID: 289048, Rattus norvegicus chr. 13<br>LIM homeobox 9                                                  | <a href="#">neur-nr2f</a> | <a href="#">450 - 307</a> | (-) |
| <b>GXP_1404917</b> [ <a href="#">GXP_1404917</a> ] (1 - 1137)<br><b>Ptpn7</b> , GXL_191273, GeneID: 246781, Rattus norvegicus chr. 13<br>protein tyrosine phosphatase, non-receptor type 7             | <a href="#">neur-nr2f</a> | <a href="#">98 - 249</a>  | (+) |
| <b>GXP_229415</b> [ <a href="#">GXP_229415</a> ] (1 - 975)<br><b>Hsd11b1</b> , GXL_191291, GeneID: 25116, Rattus norvegicus chr. 13<br>hydroxysteroid 11-beta dehydrogenase 1                          | <a href="#">neur-nr2f</a> | <a href="#">5 - 148</a>   | (+) |
| <b>GXP_237776</b> [ <a href="#">GXP_237776</a> ] (1 - 766)<br><b>Fkbp1a</b> , GXL_198133, GeneID: 25639, Rattus norvegicus chr. 3<br>FK506 binding protein 1a                                          | <a href="#">neur-nr2f</a> | <a href="#">495 - 618</a> | (+) |
| <b>GXP_237793</b> [ <a href="#">GXP_237793</a> ] (1 - 601)<br><b>Olr754 predicted</b> , GXL_198150, GeneID: 296005, Rattus norvegicus chr. 3<br>olfactory receptor 754 (predicted)                     | <a href="#">neur-nr2f</a> | <a href="#">428 - 563</a> | (+) |
| <b>GXP_1413175</b> [ <a href="#">GXP_1413175</a> ] (1 - 602)<br><b>Nek6</b> , GXL_198194, GeneID: 360161, Rattus norvegicus chr. 3<br>NIMA (never in mitosis gene a)-related expressed kinase 6        | <a href="#">neur-nr2f</a> | <a href="#">507 - 383</a> | (-) |
| <b>GXP_237896</b> [ <a href="#">GXP_237896</a> ] (1 - 645)<br><b>Lin7c</b> , GXL_198252, GeneID: 60442, Rattus norvegicus chr. 3<br>lin-7 homolog C (C. elegans)                                       | <a href="#">neur-nr2f</a> | <a href="#">361 - 227</a> | (-) |
| <b>GXP_1414060</b> [ <a href="#">GXP_1414060</a> ] (1 - 601)<br><b>Entpd6</b> , GXL_198266, GeneID: 85260, Rattus norvegicus chr. 3<br>ectonucleoside triphosphate diphosphohydrolase 6                | <a href="#">neur-nr2f</a> | <a href="#">553 - 425</a> | (-) |
|                                                                                                                                                                                                        | <a href="#">neur-nr2f</a> | <a href="#">170 - 29</a>  | (-) |

|                                                                                                                                                                                                      |                           |                           |     |
|------------------------------------------------------------------------------------------------------------------------------------------------------------------------------------------------------|---------------------------|---------------------------|-----|
| <b>GXP_237933</b> [ <a href="#">GXP_237933</a> ] (1 - 1043)<br><b>Chgb</b> , GXL_198289, GeneID: 24259, Rattus norvegicus chr. 3<br>chromogranin B                                                   |                           |                           |     |
| <b>GXP_237993</b> [ <a href="#">GXP_237993</a> ] (1 - 601)<br><b>Olr562_predicted</b> , GXL_198349, GeneID: 404869, Rattus norvegicus chr. 3<br>olfactory receptor 562 (predicted)                   | <a href="#">neur-nr2f</a> | <a href="#">342 - 212</a> | (-) |
| <b>GXP_1413593</b> [ <a href="#">GXP_1413593</a> ] (1 - 602)<br><b>Abtb2</b> , GXL_198420, GeneID: 171440, Rattus norvegicus chr. 3<br>ankyrin repeat and BTB (POZ) domain containing 2              | <a href="#">neur-nr2f</a> | <a href="#">211 - 74</a>  | (-) |
| <b>GXP_1413493</b> [ <a href="#">GXP_1413493</a> ] (1 - 603)<br><b>Acp2</b> , GXL_198444, GeneID: 24162, Rattus norvegicus chr. 3<br>acid phosphatase 2, lysosomal                                   | <a href="#">neur-nr2f</a> | <a href="#">494 - 377</a> | (-) |
| <b>GXP_238124</b> [ <a href="#">GXP_238124</a> ] (1 - 612)<br><b>Ptpra</b> , GXL_198479, GeneID: 25167, Rattus norvegicus chr. 3<br>protein tyrosine phosphatase, receptor type, A                   | <a href="#">neur-nr2f</a> | <a href="#">232 - 360</a> | (+) |
| <b>GXP_1413331</b> [ <a href="#">GXP_1413331</a> ] (1 - 602)<br><b>Cybrd1</b> , GXL_198578, GeneID: 295669, Rattus norvegicus chr. 3<br>cytochrome b reductase 1                                     | <a href="#">neur-nr2f</a> | <a href="#">108 - 242</a> | (+) |
| <b>GXP_1406154</b> [ <a href="#">GXP_1406154</a> ] (1 - 603)<br><b>Fut11</b> , GXL_198718, GeneID: 286971, Rattus norvegicus chr. 15<br>fucosyltransferase 11                                        | <a href="#">neur-nr2f</a> | <a href="#">346 - 221</a> | (-) |
| <b>GXP_238408</b> [ <a href="#">GXP_238408</a> ] (1 - 730)<br><b>Ptk2b</b> , GXL_198760, GeneID: 50646, Rattus norvegicus chr. 15<br>protein tyrosine kinase 2 beta                                  | <a href="#">neur-nr2f</a> | <a href="#">372 - 220</a> | (-) |
| <b>GXP_1406258</b> [ <a href="#">GXP_1406258</a> ] (1 - 602)<br><b>Tep1</b> , GXL_198788, GeneID: 64523, Rattus norvegicus chr. 15<br>telomerase associated protein 1                                | <a href="#">neur-nr2f</a> | <a href="#">530 - 396</a> | (-) |
| <b>GXP_1406320</b> [ <a href="#">GXP_1406320</a> ] (1 - 601)<br><b>Prmt5_predicted</b> , GXL_198840, GeneID: 364382, Rattus norvegicus chr. 15<br>protein arginine N-methyltransferase 5 (predicted) | <a href="#">neur-nr2f</a> | <a href="#">383 - 268</a> | (-) |
| <b>GXP_1406510</b> [ <a href="#">GXP_1406510</a> ] (1 - 602)<br><b>Pdlim2</b> , GXL_198850, GeneID: 290354, Rattus norvegicus chr. 15<br>PDZ and LIM domain 2                                        | <a href="#">neur-nr2f</a> | <a href="#">599 - 458</a> | (-) |
| <b>GXP_1406571</b> [ <a href="#">GXP_1406571</a> ] (1 - 601)<br><b>Cog3</b> , GXL_198933, GeneID: 361073, Rattus norvegicus chr. 15<br>component of oligomeric golgi complex 3                       | <a href="#">neur-nr2f</a> | <a href="#">515 - 369</a> | (-) |
| <b>GXP_1406268</b> [ <a href="#">GXP_1406268</a> ] (1 - 602)<br><b>Ndrq2</b> , GXL_198981, GeneID: 171114, Rattus norvegicus chr. 15<br>N-myc downstream regulated gene 2                            | <a href="#">neur-nr2f</a> | <a href="#">314 - 182</a> | (-) |
|                                                                                                                                                                                                      | <a href="#">neur-nr2f</a> | <a href="#">301 - 177</a> | (-) |

|                                                                                                                                                                                                        |                           |                             |     |
|--------------------------------------------------------------------------------------------------------------------------------------------------------------------------------------------------------|---------------------------|-----------------------------|-----|
| <b>GXP_241360</b> [ <a href="#">GXP_241360</a> ] (1 - 705)<br><b>Slc22a7</b> , GXL_201121, GeneID: 89776, Rattus norvegicus chr. 9<br>solute carrier family 22 (organic anion transporter), member 7   |                           |                             |     |
| <b>GXP_241418</b> [ <a href="#">GXP_241418</a> ] (1 - 1047)<br><b>Igfbp5</b> , GXL_201176, GeneID: 25285, Rattus norvegicus chr. 9<br>insulin-like growth factor binding protein 5                     | <a href="#">neur-nr2f</a> | <a href="#">814 - 683</a>   | (-) |
| <b>GXP_1173060</b> [ <a href="#">GXP_1173060</a> ] (1 - 601)<br><b>Vegfa</b> , GXL_201205, GeneID: 83785, Rattus norvegicus chr. 9<br>vascular endothelial growth factor A                             | <a href="#">neur-nr2f</a> | <a href="#">278 - 144</a>   | (-) |
| <b>GXP_241485</b> [ <a href="#">GXP_241485</a> ] (1 - 650)<br><b>Twsg1_predicted</b> , GXL_201241, GeneID: 363294, Rattus norvegicus chr. 9<br>twisted gastrulation homolog 1 (Drosophila) (predicted) | <a href="#">neur-nr2f</a> | <a href="#">399 - 248</a>   | (-) |
| <b>GXP_1420538</b> [ <a href="#">GXP_1420538</a> ] (1 - 609)<br><b>Tuba4a</b> , GXL_201284, GeneID: 316531, Rattus norvegicus chr. 9<br>tubulin, alpha 4A                                              | <a href="#">neur-nr2f</a> | <a href="#">387 - 530</a>   | (+) |
| <b>GXP_1420540</b> [ <a href="#">GXP_1420540</a> ] (1 - 602)<br><b>Tuba4a</b> , GXL_201284, GeneID: 316531, Rattus norvegicus chr. 9<br>tubulin, alpha 4A                                              | <a href="#">neur-nr2f</a> | <a href="#">363 - 490</a>   | (+) |
| <b>GXP_1420541</b> [ <a href="#">GXP_1420541</a> ] (1 - 601)<br><b>Tuba4a</b> , GXL_201284, GeneID: 316531, Rattus norvegicus chr. 9<br>tubulin, alpha 4A                                              | <a href="#">neur-nr2f</a> | <a href="#">404 - 531</a>   | (+) |
| <b>GXP_1420374</b> [ <a href="#">GXP_1420374</a> ] (1 - 623)<br><b>Orc2l</b> , GXL_201287, GeneID: 301430, Rattus norvegicus chr. 9<br>origin recognition complex, subunit 2-like (S. cerevisiae)      | <a href="#">neur-nr2f</a> | <a href="#">269 - 397</a>   | (+) |
| <b>GXP_1420553</b> [ <a href="#">GXP_1420553</a> ] (1 - 1468)<br><b>D1bwg1363e</b> , GXL_201311, GeneID: 316533, Rattus norvegicus chr. 9<br>chondroitin polymerizing factor                           | <a href="#">neur-nr2f</a> | <a href="#">1175 - 1050</a> | (-) |
| <b>GXP_1420679</b> [ <a href="#">GXP_1420679</a> ] (1 - 601)<br><b>Per2</b> , GXL_201351, GeneID: 63840, Rattus norvegicus chr. 9<br>period homolog 2 (Drosophila)                                     | <a href="#">neur-nr2f</a> | <a href="#">507 - 361</a>   | (-) |
| <b>GXP_1420101</b> [ <a href="#">GXP_1420101</a> ] (1 - 603)<br><b>Hspcb</b> , GXL_201364, GeneID: 301252, Rattus norvegicus chr. 9<br>heat shock 90kDa protein 1, beta                                | <a href="#">neur-nr2f</a> | <a href="#">426 - 289</a>   | (-) |
| <b>GXP_1173099</b> [ <a href="#">GXP_1173099</a> ] (1 - 837)<br><b>Mep1a</b> , GXL_201410, GeneID: 25684, Rattus norvegicus chr. 9<br>mepirin 1 alpha                                                  | <a href="#">neur-nr2f</a> | <a href="#">462 - 314</a>   | (-) |
| <b>GXP_241755</b> [ <a href="#">GXP_241755</a> ] (1 - 601)<br><b>Lrrc30_predicted</b> , GXL_201499, GeneID: 301711, Rattus norvegicus chr. 9<br>leucine rich repeat containing 30 (predicted)          | <a href="#">neur-nr2f</a> | <a href="#">342 - 459</a>   | (+) |
|                                                                                                                                                                                                        | <a href="#">neur-nr2f</a> | <a href="#">102 - 240</a>   | (+) |

|                                                                                                                                                                                                                                                                  |                           |                           |     |
|------------------------------------------------------------------------------------------------------------------------------------------------------------------------------------------------------------------------------------------------------------------|---------------------------|---------------------------|-----|
| <b>GXP_241783</b> [ <a href="#">GXP_241783</a> ] (1 - 601)<br><b>Gpr1</b> , GXL_201527, GeneID: 25457, Rattus norvegicus chr. 9<br>G protein-coupled receptor 1                                                                                                  |                           |                           |     |
| <b>GXP_241881</b> [ <a href="#">GXP_241881</a> ] (1 - 601)<br><b>Adm2</b> , GXL_201623, GeneID: 399475, Rattus norvegicus chr. 7<br>adrenomedullin 2                                                                                                             | <a href="#">neur-nr2f</a> | <a href="#">90 - 237</a>  | (+) |
| <b>GXP_1418400</b> [ <a href="#">GXP_1418400</a> ] (1 - 601)<br><b>Mapk15</b> , GXL_201655, GeneID: 286997, Rattus norvegicus chr. 7<br>mitogen-activated protein kinase 15                                                                                      | <a href="#">neur-nr2f</a> | <a href="#">447 - 563</a> | (+) |
| <b>GXP_241919</b> [ <a href="#">GXP_241919</a> ] (1 - 601)<br><b>Rdh2</b> , GXL_201660, GeneID: 299511, Rattus norvegicus chr. 7<br>retinol dehydrogenase 2                                                                                                      | <a href="#">neur-nr2f</a> | <a href="#">540 - 423</a> | (-) |
| <b>GXP_520637</b> [ <a href="#">GXP_520637</a> ] (1 - 601)<br><b>Csf2rb1</b> , GXL_201687, GeneID: 171081, Rattus norvegicus chr. 7<br>colony stimulating factor 2 receptor, beta 1, low-affinity (granulocyte-macrophage)                                       | <a href="#">neur-nr2f</a> | <a href="#">457 - 326</a> | (-) |
| <b>GXP_1418565</b> [ <a href="#">GXP_1418565</a> ] (1 - 608)<br><b>Ttll1</b> , GXL_201728, GeneID: 362969, Rattus norvegicus chr. 7<br>tubulin tyrosine ligase-like 1                                                                                            | <a href="#">neur-nr2f</a> | <a href="#">186 - 61</a>  | (-) |
| <b>GXP_1418239</b> [ <a href="#">GXP_1418239</a> ] (1 - 601)<br><b>Tac2</b> , GXL_201742, GeneID: 29191, Rattus norvegicus chr. 7<br>tachykinin 2                                                                                                                | <a href="#">neur-nr2f</a> | <a href="#">415 - 567</a> | (+) |
| <b>GXP_1418668</b> [ <a href="#">GXP_1418668</a> ] (1 - 602)<br><b>Cntn1</b> , GXL_201812, GeneID: 117258, Rattus norvegicus chr. 7<br>contactin 1                                                                                                               | <a href="#">neur-nr2f</a> | <a href="#">174 - 295</a> | (+) |
| <b>GXP_1172635</b> [ <a href="#">GXP_1172635</a> ] (1 - 601)<br><b>Mst1</b> , GXL_203448, GeneID: 24566, Rattus norvegicus chr. 8<br>Macrophage stimulating 1 (hepatocyte growth factor-like)                                                                    | <a href="#">neur-nr2f</a> | <a href="#">171 - 55</a>  | (-) |
| <b>GXP_1172680</b> [ <a href="#">GXP_1172680</a> ] (1 - 601)<br><b>Smarcc1_predicted</b> , GXL_203497, GeneID: 301020, Rattus norvegicus chr. 8<br>SWI/SNF related, matrix associated, actin dependent regulator of chromatin, subfamily c, member 1 (predicted) | <a href="#">neur-nr2f</a> | <a href="#">174 - 311</a> | (+) |
| <b>GXP_253144</b> [ <a href="#">GXP_253144</a> ] (1 - 657)<br><b>C3ar1</b> , GXL_211893, GeneID: 84007, Rattus norvegicus chr. 4<br>complement component 3a receptor 1                                                                                           | <a href="#">neur-nr2f</a> | <a href="#">257 - 127</a> | (-) |
| <b>GXP_1414717</b> [ <a href="#">GXP_1414717</a> ] (1 - 615)<br><b>Slc35b4_predicted</b> , GXL_211948, GeneID: 296969, Rattus norvegicus chr. 4<br>solute carrier family 35, member B4 (predicted)                                                               | <a href="#">neur-nr2f</a> | <a href="#">119 - 258</a> | (+) |
| <b>GXP_1414673</b> [ <a href="#">GXP_1414673</a> ] (1 - 601)<br><b>Opn1sw</b> , GXL_211995, GeneID: 81644, Rattus norvegicus chr. 4<br>opsin 1 (cone pigments), short-wave-sensitive (color blindness, tritan)                                                   | <a href="#">neur-nr2f</a> | <a href="#">213 - 349</a> | (+) |
|                                                                                                                                                                                                                                                                  | <a href="#">neur-nr2f</a> | <a href="#">224 - 361</a> | (+) |

|                                                                                                                                                                                                 |                           |                           |     |
|-------------------------------------------------------------------------------------------------------------------------------------------------------------------------------------------------|---------------------------|---------------------------|-----|
| <b>GXP_253264</b> [ <a href="#">GXP_253264</a> ] (1 - 715)<br><b>Oldlr1</b> , GXL_212001, GeneID: 140914, Rattus norvegicus chr. 4<br>oxidized low density lipoprotein (lectin-like) receptor 1 |                           |                           |     |
| <b>GXP_253326</b> [ <a href="#">GXP_253326</a> ] (1 - 643)<br><b>Mrp135 predicted</b> , GXL_212062, GeneID: 297334, Rattus norvegicus chr. 4<br>mitochondrial ribosomal protein L35 (predicted) | <a href="#">neur-nr2f</a> | <a href="#">548 - 428</a> | (-) |
| <b>GXP_253368</b> [ <a href="#">GXP_253368</a> ] (1 - 1416)<br><b>Tspan9 predicted</b> , GXL_212104, GeneID: 312728, Rattus norvegicus chr. 4<br>tetraspanin 9 (predicted)                      | <a href="#">neur-nr2f</a> | <a href="#">71 - 189</a>  | (+) |
| <b>GXP_1414655</b> [ <a href="#">GXP_1414655</a> ] (1 - 601)<br><b>Grm8</b> , GXL_212130, GeneID: 60590, Rattus norvegicus chr. 4<br>glutamate receptor, metabotropic 8                         | <a href="#">neur-nr2f</a> | <a href="#">373 - 516</a> | (+) |
| <b>GXP_1414475</b> [ <a href="#">GXP_1414475</a> ] (1 - 602)<br><b>Nos3</b> , GXL_212140, GeneID: 24600, Rattus norvegicus chr. 4<br>nitric oxide synthase 3, endothelial cell                  | <a href="#">neur-nr2f</a> | <a href="#">575 - 434</a> | (-) |
| <b>GXP_1415382</b> [ <a href="#">GXP_1415382</a> ] (1 - 641)<br><b>Ntf3</b> , GXL_212141, GeneID: 81737, Rattus norvegicus chr. 4<br>neurotrophin 3                                             | <a href="#">neur-nr2f</a> | <a href="#">462 - 342</a> | (-) |
| <b>GXP_253486</b> [ <a href="#">GXP_253486</a> ] (1 - 611)<br><b>Trh</b> , GXL_212219, GeneID: 25569, Rattus norvegicus chr. 4<br>thyrotropin releasing hormone                                 | <a href="#">neur-nr2f</a> | <a href="#">169 - 285</a> | (+) |
| <b>GXP_1415330</b> [ <a href="#">GXP_1415330</a> ] (1 - 618)<br><b>Clsn3</b> , GXL_212309, GeneID: 171393, Rattus norvegicus chr. 4<br>calsyntenin 3                                            | <a href="#">neur-nr2f</a> | <a href="#">188 - 312</a> | (+) |
| <b>GXP_258838</b> [ <a href="#">GXP_258838</a> ] (1 - 601)<br><b>Olr1 predicted</b> , GXL_216794, GeneID: 365170, Rattus norvegicus chr. 1<br>olfactory receptor 1 (predicted)                  | <a href="#">neur-nr2f</a> | <a href="#">507 - 386</a> | (-) |
| <b>GXP_258882</b> [ <a href="#">GXP_258882</a> ] (1 - 1440)<br><b>Lgi4</b> , GXL_216836, GeneID: 361549, Rattus norvegicus chr. 1<br>leucine-rich repeat LGI family, member 4                   | <a href="#">neur-nr2f</a> | <a href="#">402 - 251</a> | (-) |
| <b>GXP_258910</b> [ <a href="#">GXP_258910</a> ] (1 - 700)<br><b>Lypd3</b> , GXL_216864, GeneID: 60378, Rattus norvegicus chr. 1<br>Ly6/Plaur domain containing 3                               | <a href="#">neur-nr2f</a> | <a href="#">674 - 546</a> | (-) |
| <b>GXP_1157968</b> [ <a href="#">GXP_1157968</a> ] (1 - 601)<br><b>Syt3</b> , GXL_216876, GeneID: 25731, Rattus norvegicus chr. 1<br>synaptotagmin III                                          | <a href="#">neur-nr2f</a> | <a href="#">468 - 594</a> | (+) |
| <b>GXP_258937</b> [ <a href="#">GXP_258937</a> ] (1 - 1035)<br><b>Nphs1</b> , GXL_216890, GeneID: 64563, Rattus norvegicus chr. 1<br>nephrosis 1 homolog, nephrin (human)                       | <a href="#">neur-nr2f</a> | <a href="#">368 - 245</a> | (-) |
|                                                                                                                                                                                                 | <a href="#">neur-nr2f</a> | <a href="#">543 - 406</a> | (-) |

|                                                                                                                                                                                                                              |                           |                           |     |
|------------------------------------------------------------------------------------------------------------------------------------------------------------------------------------------------------------------------------|---------------------------|---------------------------|-----|
| <b>GXP_1409476</b> [ <a href="#">GXP_1409476</a> ] (1 - 618)<br><b>Kcnc3</b> , GXL_216903, GeneID: 117101, Rattus norvegicus chr. 1<br>potassium voltage gated channel, Shaw-related subfamily, member 3                     |                           |                           |     |
| <b>GXP_258983</b> [ <a href="#">GXP_258983</a> ] (1 - 601)<br><b>Ceacam3</b> , GXL_216933, GeneID: 24926, Rattus norvegicus chr. 1<br>carcinoembryonic antigen-related cell adhesion molecule 3                              | <a href="#">neur-nr2f</a> | <a href="#">334 - 211</a> | (-) |
| <b>GXP_1409196</b> [ <a href="#">GXP_1409196</a> ] (1 - 714)<br><b>Ckm</b> , GXL_217103, GeneID: 24265, Rattus norvegicus chr. 1<br>creatine kinase, muscle                                                                  | <a href="#">neur-nr2f</a> | <a href="#">706 - 589</a> | (-) |
| <b>GXP_259196</b> [ <a href="#">GXP_259196</a> ] (1 - 601)<br><b>Pglyrp1</b> , GXL_217139, GeneID: 84387, Rattus norvegicus chr. 1<br>peptidoglycan recognition protein 1                                                    | <a href="#">neur-nr2f</a> | <a href="#">137 - 284</a> | (+) |
| <b>GXP_259200</b> [ <a href="#">GXP_259200</a> ] (1 - 1140)<br><b>Slc27a5</b> , GXL_217143, GeneID: 79111, Rattus norvegicus chr. 1<br>solute carrier family 27 (fatty acid transporter), member 5                           | <a href="#">neur-nr2f</a> | <a href="#">375 - 236</a> | (-) |
| <b>GXP_1409528</b> [ <a href="#">GXP_1409528</a> ] (1 - 601)<br><b>Ntf5</b> , GXL_217255, GeneID: 25730, Rattus norvegicus chr. 1<br>neurotrophin 5                                                                          | <a href="#">neur-nr2f</a> | <a href="#">425 - 307</a> | (-) |
| <b>GXP_1410549</b> [ <a href="#">GXP_1410549</a> ] (1 - 602)<br><b>B3gnt6_predicted</b> , GXL_232973, GeneID: 293667, Rattus norvegicus chr. 1<br>UDP-GlcNAc:betaGal beta-1, 3-N-acetylglucosaminyltransferase 6 (predicted) | <a href="#">neur-nr2f</a> | <a href="#">507 - 366</a> | (-) |
| <b>GXP_1411004</b> [ <a href="#">GXP_1411004</a> ] (1 - 601)<br><b>Nolc1</b> , GXL_233143, GeneID: 64896, Rattus norvegicus chr. 1<br>nucleolar and coiled-body phosphoprotein 1                                             | <a href="#">neur-nr2f</a> | <a href="#">237 - 389</a> | (+) |
| <b>GXP_1410548</b> [ <a href="#">GXP_1410548</a> ] (1 - 601)<br><b>Slc29a2</b> , GXL_233171, GeneID: 65194, Rattus norvegicus chr. 1<br>solute carrier family 29 (nucleoside transporters), member 2                         | <a href="#">neur-nr2f</a> | <a href="#">450 - 566</a> | (+) |
| <b>GXP_1420287</b> [ <a href="#">GXP_1420287</a> ] (1 - 668)<br><b>Il1rl1</b> , GXL_233349, GeneID: 25556, Rattus norvegicus chr. 9<br>interleukin 1 receptor-like 1                                                         | <a href="#">neur-nr2f</a> | <a href="#">613 - 499</a> | (-) |
| <b>GXP_1420700</b> [ <a href="#">GXP_1420700</a> ] (1 - 601)<br><b>Ngep</b> , GXL_233396, GeneID: 367318, Rattus norvegicus chr. 9<br>new gene expressed in prostate                                                         | <a href="#">neur-nr2f</a> | <a href="#">312 - 444</a> | (+) |
| <b>GXP_865917</b> [ <a href="#">GXP_865917</a> ] (1 - 601)<br><b>Ugt1a1</b> , GXL_233421, GeneID: 24861, Rattus norvegicus chr. 9<br>UDP glycosyltransferase 1 family, polypeptide A1                                        | <a href="#">neur-nr2f</a> | <a href="#">523 - 375</a> | (-) |
| <b>GXP_278591</b> [ <a href="#">GXP_278591</a> ] (1 - 601)<br><b>Rpl37a_predicted</b> , GXL_233475, GeneID: 363248, Rattus norvegicus chr. 9<br>ribosomal protein L37a (predicted)                                           | <a href="#">neur-nr2f</a> | <a href="#">146 - 266</a> | (+) |
|                                                                                                                                                                                                                              | <a href="#">neur-nr2f</a> | <a href="#">243 - 113</a> | (-) |

|                                                                                                                                                                                                       |                           |                           |     |
|-------------------------------------------------------------------------------------------------------------------------------------------------------------------------------------------------------|---------------------------|---------------------------|-----|
| <b>GXP_1173524</b> [ <a href="#">GXP_1173524</a> ] (1 - 889)<br><b>Abi2</b> , GXL_233484, GeneID: 286928, Rattus norvegicus chr. 9<br>abl-interactor 2                                                |                           |                           |     |
| <b>GXP_1420509</b> [ <a href="#">GXP_1420509</a> ] (1 - 1314)<br><b>Bcs1l</b> , GXL_233532, GeneID: 301514, Rattus norvegicus chr. 9<br>BCS1-like (yeast)                                             | <a href="#">neur-nr2f</a> | <a href="#">799 - 667</a> | (-) |
| <b>GXP_1420777</b> [ <a href="#">GXP_1420777</a> ] (1 - 601)<br><b>Dlgap1</b> , GXL_233554, GeneID: 65040, Rattus norvegicus chr. 9<br>discs, large (Drosophila) homolog-associated protein 1         | <a href="#">neur-nr2f</a> | <a href="#">163 - 288</a> | (+) |
| <b>GXP_1415550</b> [ <a href="#">GXP_1415550</a> ] (1 - 608)<br><b>Rdh10</b> , GXL_241568, GeneID: 353252, Rattus norvegicus chr. 5<br>retinol dehydrogenase 10 (all-trans)                           | <a href="#">neur-nr2f</a> | <a href="#">307 - 186</a> | (-) |
| <b>GXP_287412</b> [ <a href="#">GXP_287412</a> ] (1 - 601)<br><b>Dio1</b> , GXL_241575, GeneID: 25430, Rattus norvegicus chr. 5<br>deiodinase, iodothyronine, type I                                  | <a href="#">neur-nr2f</a> | <a href="#">306 - 437</a> | (+) |
| <b>GXP_287522</b> [ <a href="#">GXP_287522</a> ] (1 - 601)<br><b>Olr866_predicted</b> , GXL_241681, GeneID: 298475, Rattus norvegicus chr. 5<br>olfactory receptor 866 (predicted)                    | <a href="#">neur-nr2f</a> | <a href="#">306 - 434</a> | (+) |
| <b>GXP_1416241</b> [ <a href="#">GXP_1416241</a> ] (1 - 1447)<br><b>Lrrc41</b> , GXL_241693, GeneID: 362566, Rattus norvegicus chr. 5<br>leucine rich repeat containing 41                            | <a href="#">neur-nr2f</a> | <a href="#">505 - 626</a> | (+) |
| <b>GXP_1416175</b> [ <a href="#">GXP_1416175</a> ] (1 - 602)<br><b>Mrpl37</b> , GXL_241818, GeneID: 56281, Rattus norvegicus chr. 5<br>mitochondrial ribosomal protein L37                            | <a href="#">neur-nr2f</a> | <a href="#">539 - 413</a> | (-) |
| <b>GXP_1416021</b> [ <a href="#">GXP_1416021</a> ] (1 - 601)<br><b>Mpdz</b> , GXL_241859, GeneID: 29365, Rattus norvegicus chr. 5<br>multiple PDZ domain protein                                      | <a href="#">neur-nr2f</a> | <a href="#">555 - 435</a> | (-) |
| <b>GXP_1416303</b> [ <a href="#">GXP_1416303</a> ] (1 - 602)<br><b>Ptpnf</b> , GXL_241910, GeneID: 360406, Rattus norvegicus chr. 5<br>protein tyrosine phosphatase, receptor type, F                 | <a href="#">neur-nr2f</a> | <a href="#">390 - 275</a> | (-) |
| <b>GXP_287852</b> [ <a href="#">GXP_287852</a> ] (1 - 655)<br><b>Dbccr1</b> , GXL_242008, GeneID: 140610, Rattus norvegicus chr. 5<br>deleted in bladder cancer chromosome region candidate 1 (human) | <a href="#">neur-nr2f</a> | <a href="#">642 - 525</a> | (-) |
| <b>GXP_287857</b> [ <a href="#">GXP_287857</a> ] (1 - 1062)<br><b>Atabd1b_predicted</b> , GXL_242013, GeneID: 362614, Rattus norvegicus chr. 5<br>ATP binding domain 1 family, member B (predicted)   | <a href="#">neur-nr2f</a> | <a href="#">397 - 280</a> | (-) |
| <b>GXP_288196</b> [ <a href="#">GXP_288196</a> ] (1 - 711)<br><b>Cog6</b> , GXL_242272, GeneID: 310411, Rattus norvegicus chr. 2<br>component of oligomeric golgi complex 6                           | <a href="#">neur-nr2f</a> | <a href="#">354 - 469</a> | (+) |
|                                                                                                                                                                                                       | <a href="#">neur-nr2f</a> | <a href="#">159 - 40</a>  | (-) |



|                                                                                                                                                                                                |                           |                           |     |
|------------------------------------------------------------------------------------------------------------------------------------------------------------------------------------------------|---------------------------|---------------------------|-----|
| <b>GXP_288228</b> [ <a href="#">GXP_288228</a> ] (1 - 955)<br><b>Pfn2</b> , GXL_242302, GeneID: 81531, Rattus norvegicus chr. 2<br>profilin 2                                                  |                           |                           |     |
| <b>GXP_1411678</b> [ <a href="#">GXP_1411678</a> ] (1 - 602)<br><b>Sv2c</b> , GXL_242333, GeneID: 29643, Rattus norvegicus chr. 2<br>synaptic vesicle glycoprotein 2c                          | <a href="#">neur-nr2f</a> | <a href="#">204 - 78</a>  | (-) |
| <b>GXP_355553</b> [ <a href="#">GXP_355553</a> ] (1 - 601)<br><b>Lmna</b> , GXL_242362, GeneID: 60374, Rattus norvegicus chr. 2<br>lamin A                                                     | <a href="#">neur-nr2f</a> | <a href="#">359 - 490</a> | (+) |
| <b>GXP_288367</b> [ <a href="#">GXP_288367</a> ] (1 - 1085)<br><b>Efna1</b> , GXL_242438, GeneID: 94268, Rattus norvegicus chr. 2<br>ephrin A1                                                 | <a href="#">neur-nr2f</a> | <a href="#">45 - 179</a>  | (+) |
| <b>GXP_1412475</b> [ <a href="#">GXP_1412475</a> ] (1 - 601)<br><b>Pde4dip</b> , GXL_242523, GeneID: 64183, Rattus norvegicus chr. 2<br>phosphodiesterase 4D interacting protein (myomegalin)  | <a href="#">neur-nr2f</a> | <a href="#">484 - 349</a> | (-) |
| <b>GXP_288509</b> [ <a href="#">GXP_288509</a> ] (1 - 881)<br><b>Pelo</b> , GXL_242579, GeneID: 294754, Rattus norvegicus chr. 2<br>pelota homolog                                             | <a href="#">neur-nr2f</a> | <a href="#">212 - 73</a>  | (-) |
| <b>GXP_1411671</b> [ <a href="#">GXP_1411671</a> ] (1 - 613)<br><b>Pde8b</b> , GXL_242650, GeneID: 309962, Rattus norvegicus chr. 2<br>phosphodiesterase 8B                                    | <a href="#">neur-nr2f</a> | <a href="#">2 - 118</a>   | (+) |
| <b>GXP_1412319</b> [ <a href="#">GXP_1412319</a> ] (1 - 643)<br><b>Rab25_predicted</b> , GXL_242656, GeneID: 310632, Rattus norvegicus chr. 2<br>RAB25, member RAS oncogene family (predicted) | <a href="#">neur-nr2f</a> | <a href="#">195 - 325</a> | (+) |
| <b>GXP_1414259</b> [ <a href="#">GXP_1414259</a> ] (1 - 601)<br><b>Svs2</b> , GXL_246083, GeneID: 25013, Rattus norvegicus chr. 3<br>seminal vesicle protein, secretion 2                      | <a href="#">neur-nr2f</a> | <a href="#">430 - 287</a> | (-) |
| <b>GXP_1414260</b> [ <a href="#">GXP_1414260</a> ] (1 - 601)<br><b>Svs2</b> , GXL_246083, GeneID: 25013, Rattus norvegicus chr. 3<br>seminal vesicle protein, secretion 2                      | <a href="#">neur-nr2f</a> | <a href="#">432 - 289</a> | (-) |
| <b>GXP_292703</b> [ <a href="#">GXP_292703</a> ] (1 - 1219)<br><b>Arfrp1</b> , GXL_246111, GeneID: 117051, Rattus norvegicus chr. 3<br>ADP-ribosylation factor related protein 1               | <a href="#">neur-nr2f</a> | <a href="#">712 - 559</a> | (-) |
| <b>GXP_1412938</b> [ <a href="#">GXP_1412938</a> ] (1 - 602)<br><b>Kcnt1</b> , GXL_246117, GeneID: 60444, Rattus norvegicus chr. 3<br>potassium channel, subfamily T, member 1                 | <a href="#">neur-nr2f</a> | <a href="#">153 - 287</a> | (+) |
| <b>GXP_292721</b> [ <a href="#">GXP_292721</a> ] (1 - 1030)<br><b>Rgs19</b> , GXL_246129, GeneID: 59293, Rattus norvegicus chr. 3<br>regulator of G-protein signaling 19                       | <a href="#">neur-nr2f</a> | <a href="#">924 - 784</a> | (-) |
|                                                                                                                                                                                                | <a href="#">neur-nr2f</a> | <a href="#">463 - 310</a> | (-) |

|                                                                                                                                                                                                          |                           |                            |     |
|----------------------------------------------------------------------------------------------------------------------------------------------------------------------------------------------------------|---------------------------|----------------------------|-----|
| <b>GXP_292790</b> [ <a href="#">GXP_292790</a> ] (1 - 875)<br><b>Angptl2</b> , GXL_246197, GeneID: 171100, Rattus norvegicus chr. 3<br>angiopoietin-like 2                                               |                           |                            |     |
| <b>GXP_1413981</b> [ <a href="#">GXP_1413981</a> ] (1 - 1365)<br><b>Mkks</b> , GXL_246314, GeneID: 311456, Rattus norvegicus chr. 3<br>McKusick-Kaufman syndrome protein                                 | <a href="#">neur-nr2f</a> | <a href="#">31 - 183</a>   | (+) |
| <b>GXP_1164811</b> [ <a href="#">GXP_1164811</a> ] (1 - 601)<br><b>Stau1</b> , GXL_246370, GeneID: 84496, Rattus norvegicus chr. 3<br>staufen RNA binding protein homolog 1 (Drosophila)                 | <a href="#">neur-nr2f</a> | <a href="#">405 - 260</a>  | (-) |
| <b>GXP_1413705</b> [ <a href="#">GXP_1413705</a> ] (1 - 602)<br><b>Plcb2</b> , GXL_246397, GeneID: 85240, Rattus norvegicus chr. 3<br>phospholipase C, beta 2                                            | <a href="#">neur-nr2f</a> | <a href="#">460 - 321</a>  | (-) |
| <b>GXP_1164895</b> [ <a href="#">GXP_1164895</a> ] (1 - 629)<br><b>Sycp2</b> , GXL_246438, GeneID: 83820, Rattus norvegicus chr. 3<br>synaptonemal complex protein 2                                     | <a href="#">neur-nr2f</a> | <a href="#">101 - 250</a>  | (+) |
| <b>GXP_1405648</b> [ <a href="#">GXP_1405648</a> ] (1 - 1064)<br><b>Pdgfra</b> , GXL_247065, GeneID: 25267, Rattus norvegicus chr. 14<br>platelet derived growth factor receptor, alpha polypeptide      | <a href="#">neur-nr2f</a> | <a href="#">900 - 1044</a> | (+) |
| <b>GXP_293856</b> [ <a href="#">GXP_293856</a> ] (1 - 601)<br><b>Rpl5</b> , GXL_247132, GeneID: 81763, Rattus norvegicus chr. 14<br>ribosomal protein L5                                                 | <a href="#">neur-nr2f</a> | <a href="#">121 - 3</a>    | (-) |
| <b>GXP_1405574</b> [ <a href="#">GXP_1405574</a> ] (1 - 626)<br><b>Ereg</b> , GXL_247162, GeneID: 59325, Rattus norvegicus chr. 14<br>epiregulin                                                         | <a href="#">neur-nr2f</a> | <a href="#">261 - 387</a>  | (+) |
| <b>GXP_1405491</b> [ <a href="#">GXP_1405491</a> ] (1 - 602)<br><b>Arhgap24</b> , GXL_247228, GeneID: 305156, Rattus norvegicus chr. 14<br>Rho GTPase activating protein 24                              | <a href="#">neur-nr2f</a> | <a href="#">169 - 311</a>  | (+) |
| <b>GXP_293981</b> [ <a href="#">GXP_293981</a> ] (1 - 601)<br><b>Ccng2_predicted</b> , GXL_247255, GeneID: 29157, Rattus norvegicus chr. 14<br>cyclin G2 (predicted)                                     | <a href="#">neur-nr2f</a> | <a href="#">360 - 496</a>  | (+) |
| <b>GXP_302445</b> [ <a href="#">GXP_302445</a> ] (1 - 601)<br><b>Olr7_predicted</b> , GXL_254115, GeneID: 405043, Rattus norvegicus chr. 1<br>olfactory receptor 7 (predicted)                           | <a href="#">neur-nr2f</a> | <a href="#">525 - 378</a>  | (-) |
| <b>GXP_309296</b> [ <a href="#">GXP_309296</a> ] (1 - 710)<br><b>Spink1</b> , GXL_260107, GeneID: 24833, Rattus norvegicus chr. 18<br>serine protease inhibitor, Kazal type 1                            | <a href="#">neur-nr2f</a> | <a href="#">521 - 654</a>  | (+) |
| <b>GXP_1408105</b> [ <a href="#">GXP_1408105</a> ] (1 - 602)<br><b>Stard6</b> , GXL_260132, GeneID: 291527, Rattus norvegicus chr. 18<br>STAR-related lipid transfer (START) domain containing protein 6 | <a href="#">neur-nr2f</a> | <a href="#">332 - 189</a>  | (-) |
|                                                                                                                                                                                                          | <a href="#">neur-nr2f</a> | <a href="#">162 - 24</a>   | (-) |

|                                                                                                                                                                                                                           |                           |                           |     |
|---------------------------------------------------------------------------------------------------------------------------------------------------------------------------------------------------------------------------|---------------------------|---------------------------|-----|
| <b>GXP_309383</b> [ <a href="#">GXP_309383</a> ] (1 - 898)<br><b>Atp5a1</b> , GXL_260179, GeneID: 65262, Rattus norvegicus chr. 18<br>ATP synthase, H+ transporting, mitochondrial F1 complex, alpha subunit, isoform 1   |                           |                           |     |
| <b>GXP_1407874</b> [ <a href="#">GXP_1407874</a> ] (1 - 621)<br><b>Cxxc5</b> , GXL_260256, GeneID: 291670, Rattus norvegicus chr. 18<br>CXXC finger 5                                                                     | <a href="#">neur-nr2f</a> | <a href="#">459 - 579</a> | (+) |
| <b>GXP_1408192</b> [ <a href="#">GXP_1408192</a> ] (1 - 602)<br><b>Cndp2</b> , GXL_260267, GeneID: 291394, Rattus norvegicus chr. 18<br>CNDP dipeptidase 2 (metallopeptidase M20 family)                                  | <a href="#">neur-nr2f</a> | <a href="#">472 - 342</a> | (-) |
| <b>GXP_309558</b> [ <a href="#">GXP_309558</a> ] (1 - 832)<br><b>Txn1l1</b> , GXL_260349, GeneID: 140922, Rattus norvegicus chr. 18<br>thioredoxin-like 1                                                                 | <a href="#">neur-nr2f</a> | <a href="#">140 - 279</a> | (+) |
| <b>GXP_1407863</b> [ <a href="#">GXP_1407863</a> ] (1 - 602)<br><b>Catna1</b> , GXL_260411, GeneID: 307505, Rattus norvegicus chr. 18<br>catenin (cadherin-associated protein), alpha 1                                   | <a href="#">neur-nr2f</a> | <a href="#">125 - 244</a> | (+) |
| <b>GXP_1408128</b> [ <a href="#">GXP_1408128</a> ] (1 - 602)<br><b>Acaa2</b> , GXL_260536, GeneID: 170465, Rattus norvegicus chr. 18<br>acetyl-Coenzyme A acyltransferase 2 (mitochondrial 3-oxoacyl-Coenzyme A thiolase) | <a href="#">neur-nr2f</a> | <a href="#">278 - 152</a> | (-) |
| <b>GXP_312760</b> [ <a href="#">GXP_312760</a> ] (1 - 950)<br><b>Sucla2 predicted</b> , GXL_262999, GeneID: 361071, Rattus norvegicus chr. 15<br>succinate-Coenzyme A ligase, ADP-forming, beta subunit (predicted)       | <a href="#">neur-nr2f</a> | <a href="#">537 - 412</a> | (-) |
| <b>GXP_1406598</b> [ <a href="#">GXP_1406598</a> ] (1 - 601)<br><b>Tdrd3</b> , GXL_263094, GeneID: 306066, Rattus norvegicus chr. 15<br>tudor domain containing 3                                                         | <a href="#">neur-nr2f</a> | <a href="#">808 - 665</a> | (-) |
| <b>GXP_312933</b> [ <a href="#">GXP_312933</a> ] (1 - 679)<br><b>Nufip1</b> , GXL_263172, GeneID: 364430, Rattus norvegicus chr. 15<br>nuclear fragile X mental retardation protein interacting protein 1                 | <a href="#">neur-nr2f</a> | <a href="#">521 - 405</a> | (-) |
| <b>GXP_313057</b> [ <a href="#">GXP_313057</a> ] (1 - 601)<br><b>Udpgr2</b> , GXL_263281, GeneID: 286954, Rattus norvegicus chr. 14<br>liver UDP-glucuronosyltransferase, phenobarbital-inducible form                    | <a href="#">neur-nr2f</a> | <a href="#">510 - 363</a> | (-) |
| <b>GXP_1406047</b> [ <a href="#">GXP_1406047</a> ] (1 - 1424)<br><b>Vps54</b> , GXL_263293, GeneID: 286932, Rattus norvegicus chr. 14<br>vacuolar protein sorting 54 (yeast)                                              | <a href="#">neur-nr2f</a> | <a href="#">279 - 149</a> | (-) |
| <b>GXP_313107</b> [ <a href="#">GXP_313107</a> ] (1 - 601)<br><b>Tmem17</b> , GXL_263330, GeneID: 360985, Rattus norvegicus chr. 14<br>transmembrane protein 17                                                           | <a href="#">neur-nr2f</a> | <a href="#">579 - 453</a> | (-) |
| <b>GXP_1405979</b> [ <a href="#">GXP_1405979</a> ] (1 - 601)<br><b>Spergen2</b> , GXL_263336, GeneID: 305491, Rattus norvegicus chr. 14<br>spermatogenic cell-specific gene 2                                             | <a href="#">neur-nr2f</a> | <a href="#">573 - 434</a> | (-) |
|                                                                                                                                                                                                                           | <a href="#">neur-nr2f</a> | <a href="#">7 - 147</a>   | (+) |
|                                                                                                                                                                                                                           | <a href="#">neur-nr2f</a> | <a href="#">373 - 249</a> | (-) |

|                                                                                                                                                                                                              |                           |                           |     |
|--------------------------------------------------------------------------------------------------------------------------------------------------------------------------------------------------------------|---------------------------|---------------------------|-----|
| <b>GXP_313217</b> [ <a href="#">GXP_313217</a> ] (1 - 601)<br><b>Ugt2a1</b> , GXL_263438, GeneID: 63867, Rattus norvegicus chr. 14<br>UDP glucuronosyltransferase 2 family, polypeptide A1                   |                           |                           |     |
| <b>GXP_1405602</b> [ <a href="#">GXP_1405602</a> ] (1 - 672)<br><b>Csn2</b> , GXL_263442, GeneID: 29173, Rattus norvegicus chr. 14<br>casein beta                                                            | <a href="#">neur-nr2f</a> | <a href="#">296 - 449</a> | (+) |
| <b>GXP_313249</b> [ <a href="#">GXP_313249</a> ] (1 - 601)<br><b>Gnrhr</b> , GXL_263468, GeneID: 81668, Rattus norvegicus chr. 14<br>gonadotropin releasing hormone receptor                                 | <a href="#">neur-nr2f</a> | <a href="#">312 - 426</a> | (+) |
| <b>GXP_1405940</b> [ <a href="#">GXP_1405940</a> ] (1 - 603)<br><b>Sf3a1_predicted</b> , GXL_263482, GeneID: 305479, Rattus norvegicus chr. 14<br>splicing factor 3a, subunit 1 (predicted)                  | <a href="#">neur-nr2f</a> | <a href="#">341 - 468</a> | (+) |
| <b>GXP_1405941</b> [ <a href="#">GXP_1405941</a> ] (1 - 602)<br><b>Sf3a1_predicted</b> , GXL_263482, GeneID: 305479, Rattus norvegicus chr. 14<br>splicing factor 3a, subunit 1 (predicted)                  | <a href="#">neur-nr2f</a> | <a href="#">183 - 302</a> | (+) |
| <b>GXP_313272</b> [ <a href="#">GXP_313272</a> ] (1 - 666)<br><b>Htra3_predicted</b> , GXL_263491, GeneID: 360959, Rattus norvegicus chr. 14<br>HtrA serine peptidase 3 (predicted)                          | <a href="#">neur-nr2f</a> | <a href="#">355 - 230</a> | (-) |
| <b>GXP_314996</b> [ <a href="#">GXP_314996</a> ] (1 - 642)<br><b>Cd48</b> , GXL_264972, GeneID: 245962, Rattus norvegicus chr. 13<br>CD48 antigen                                                            | <a href="#">neur-nr2f</a> | <a href="#">218 - 101</a> | (-) |
| <b>GXP_315038</b> [ <a href="#">GXP_315038</a> ] (1 - 672)<br><b>Slamf9_predicted</b> , GXL_265013, GeneID: 289235, Rattus norvegicus chr. 13<br>SLAM family member 9 (predicted)                            | <a href="#">neur-nr2f</a> | <a href="#">294 - 169</a> | (-) |
| <b>GXP_1157032</b> [ <a href="#">GXP_1157032</a> ] (1 - 601)<br><b>Rps6ka2</b> , GXL_317448, GeneID: 117269, Rattus norvegicus chr. 1<br>ribosomal protein S6 kinase polypeptide 2                           | <a href="#">neur-nr2f</a> | <a href="#">120 - 265</a> | (+) |
| <b>GXP_495515</b> [ <a href="#">GXP_495515</a> ] (1 - 601)<br><b>Psg16_predicted</b> , GXL_317659, GeneID: 24257, Rattus norvegicus chr. 1<br>pregnancy specific glycoprotein 16 (predicted)                 | <a href="#">neur-nr2f</a> | <a href="#">417 - 294</a> | (-) |
| <b>GXP_1409301</b> [ <a href="#">GXP_1409301</a> ] (1 - 602)<br><b>Samd4b</b> , GXL_317747, GeneID: 308473, Rattus norvegicus chr. 1<br>sterile alpha motif domain containing 4B                             | <a href="#">neur-nr2f</a> | <a href="#">155 - 24</a>  | (-) |
| <b>GXP_495741</b> [ <a href="#">GXP_495741</a> ] (1 - 822)<br><b>Map4k1_predicted</b> , GXL_317754, GeneID: 292763, Rattus norvegicus chr. 1<br>mitogen activated protein kinase kinase kinase 1 (predicted) | <a href="#">neur-nr2f</a> | <a href="#">231 - 373</a> | (+) |
| <b>GXP_495892</b> [ <a href="#">GXP_495892</a> ] (1 - 602)<br><b>Gramd1a</b> , GXL_317805, GeneID: 361550, Rattus norvegicus chr. 1<br>GRAM domain containing 1A                                             | <a href="#">neur-nr2f</a> | <a href="#">130 - 1</a>   | (-) |
|                                                                                                                                                                                                              | <a href="#">neur-nr2f</a> | <a href="#">469 - 324</a> | (-) |

|                                                                                                                                                                                                                                               |                           |                           |     |
|-----------------------------------------------------------------------------------------------------------------------------------------------------------------------------------------------------------------------------------------------|---------------------------|---------------------------|-----|
| <b>GXP_496190</b> [ <a href="#">GXP_496190</a> ] (1 - 1317)<br><b>Kdelr1</b> , GXL_317916, GeneID: 361577, Rattus norvegicus chr. 1<br>KDEL (Lys-Asp-Glu-Leu) endoplasmic reticulum protein retention receptor 1                              |                           |                           |     |
| <b>GXP_1410073</b> [ <a href="#">GXP_1410073</a> ] (1 - 601)<br><b>Arntl</b> , GXL_318178, GeneID: 29657, Rattus norvegicus chr. 1<br>aryl hydrocarbon receptor nuclear translocator-like                                                     | <a href="#">neur-nr2f</a> | <a href="#">202 - 349</a> | (+) |
| <b>GXP_1410212</b> [ <a href="#">GXP_1410212</a> ] (1 - 602)<br><b>Eif3s8</b> , GXL_318245, GeneID: 293484, Rattus norvegicus chr. 1<br>eukaryotic translation initiation factor 3, subunit 8, 110kDa                                         | <a href="#">neur-nr2f</a> | <a href="#">335 - 221</a> | (-) |
| <b>GXP_850539</b> [ <a href="#">GXP_850539</a> ] (1 - 607)<br><b>Tcirg1</b> , GXL_318406, GeneID: 293650, Rattus norvegicus chr. 1<br>T-cell, immune regulator 1                                                                              | <a href="#">neur-nr2f</a> | <a href="#">414 - 552</a> | (+) |
| <b>GXP_497662</b> [ <a href="#">GXP_497662</a> ] (1 - 602)<br><b>Cnih2</b> , GXL_318424, GeneID: 361705, Rattus norvegicus chr. 1<br>cornichon homolog 2 (Drosophila)                                                                         | <a href="#">neur-nr2f</a> | <a href="#">32 - 171</a>  | (+) |
| <b>GXP_497843</b> [ <a href="#">GXP_497843</a> ] (1 - 754)<br><b>Taf6l_predicted</b> , GXL_318477, GeneID: 309194, Rattus norvegicus chr. 1<br>TAF6-like RNA polymerase II, p300/CBP-associated factor (PCAF)-associated factor (predicted)   | <a href="#">neur-nr2f</a> | <a href="#">233 - 382</a> | (+) |
| <b>GXP_1410649</b> [ <a href="#">GXP_1410649</a> ] (1 - 733)<br><b>Taf6l_predicted</b> , GXL_318477, GeneID: 309194, Rattus norvegicus chr. 1<br>TAF6-like RNA polymerase II, p300/CBP-associated factor (PCAF)-associated factor (predicted) | <a href="#">neur-nr2f</a> | <a href="#">323 - 191</a> | (-) |
| <b>GXP_497852</b> [ <a href="#">GXP_497852</a> ] (1 - 650)<br><b>Ganab_predicted</b> , GXL_318481, GeneID: 293721, Rattus norvegicus chr. 1<br>alpha glucosidase 2 alpha neutral subunit (predicted)                                          | <a href="#">neur-nr2f</a> | <a href="#">48 - 178</a>  | (+) |
| <b>GXP_850705</b> [ <a href="#">GXP_850705</a> ] (1 - 601)<br><b>Ganab_predicted</b> , GXL_318481, GeneID: 293721, Rattus norvegicus chr. 1<br>alpha glucosidase 2 alpha neutral subunit (predicted)                                          | <a href="#">neur-nr2f</a> | <a href="#">354 - 484</a> | (+) |
| <b>GXP_1410904</b> [ <a href="#">GXP_1410904</a> ] (1 - 698)<br><b>Cep55</b> , GXL_318610, GeneID: 294074, Rattus norvegicus chr. 1<br>centrosomal protein 55                                                                                 | <a href="#">neur-nr2f</a> | <a href="#">545 - 427</a> | (-) |
| <b>GXP_1410963</b> [ <a href="#">GXP_1410963</a> ] (1 - 602)<br><b>Cwf19l1_predicted</b> , GXL_318651, GeneID: 365465, Rattus norvegicus chr. 1<br>CWF19-like 1, cell cycle control (S. pombe) (predicted)                                    | <a href="#">neur-nr2f</a> | <a href="#">392 - 240</a> | (-) |
| <b>GXP_498338</b> [ <a href="#">GXP_498338</a> ] (1 - 601)<br><b>Poll</b> , GXL_318669, GeneID: 361767, Rattus norvegicus chr. 1<br>polymerase (DNA directed), lambda                                                                         | <a href="#">neur-nr2f</a> | <a href="#">188 - 36</a>  | (-) |
| <b>GXP_498450</b> [ <a href="#">GXP_498450</a> ] (1 - 739)<br><b>Ins1</b> , GXL_318706, GeneID: 24505, Rattus norvegicus chr. 1<br>insulin 1                                                                                                  | <a href="#">neur-nr2f</a> | <a href="#">399 - 255</a> | (-) |
|                                                                                                                                                                                                                                               | <a href="#">neur-nr2f</a> | <a href="#">386 - 246</a> | (-) |

|                                                                                                                                                                                                     |                           |                           |     |
|-----------------------------------------------------------------------------------------------------------------------------------------------------------------------------------------------------|---------------------------|---------------------------|-----|
| <b>GXP_1402161</b> [ <a href="#">GXP_1402161</a> ] (1 - 601)<br><b>Zc3h7a predicted</b> , GXL_318765, GeneID: 360466, Rattus norvegicus chr. 10<br>zinc finger CCCH type containing 7 A (predicted) |                           |                           |     |
| <b>GXP_1147259</b> [ <a href="#">GXP_1147259</a> ] (1 - 601)<br><b>Sqstm1</b> , GXL_318931, GeneID: 113894, Rattus norvegicus chr. 10<br>sequestosome 1                                             | <a href="#">neur-nr2f</a> | <a href="#">307 - 444</a> | (+) |
| <b>GXP_1147458</b> [ <a href="#">GXP_1147458</a> ] (1 - 601)<br><b>Map2k3</b> , GXL_319020, GeneID: 303200, Rattus norvegicus chr. 10<br>mitogen activated protein kinase kinase 3                  | <a href="#">neur-nr2f</a> | <a href="#">144 - 260</a> | (+) |
| <b>GXP_499296</b> [ <a href="#">GXP_499296</a> ] (1 - 673)<br><b>Mfap4</b> , GXL_319025, GeneID: 287382, Rattus norvegicus chr. 10<br>microfibrillar-associated protein 4                           | <a href="#">neur-nr2f</a> | <a href="#">234 - 374</a> | (+) |
| <b>GXP_1402796</b> [ <a href="#">GXP_1402796</a> ] (1 - 602)<br><b>Rutbc1 predicted</b> , GXL_319143, GeneID: 303304, Rattus norvegicus chr. 10<br>RUN and TBC1 domain containing 1 (predicted)     | <a href="#">neur-nr2f</a> | <a href="#">217 - 348</a> | (+) |
| <b>GXP_499948</b> [ <a href="#">GXP_499948</a> ] (1 - 671)<br><b>Mks1</b> , GXL_319258, GeneID: 287612, Rattus norvegicus chr. 10<br>Meckel syndrome, type 1                                        | <a href="#">neur-nr2f</a> | <a href="#">344 - 220</a> | (-) |
| <b>GXP_500185</b> [ <a href="#">GXP_500185</a> ] (1 - 601)<br><b>Thrap4</b> , GXL_319339, GeneID: 619436, Rattus norvegicus chr. 10<br>thyroid hormone receptor associated protein 4                | <a href="#">neur-nr2f</a> | <a href="#">223 - 83</a>  | (-) |
| <b>GXP_1403263</b> [ <a href="#">GXP_1403263</a> ] (1 - 601)<br><b>Vat1</b> , GXL_319378, GeneID: 287721, Rattus norvegicus chr. 10<br>vesicle amine transport protein 1 homolog (T californica)    | <a href="#">neur-nr2f</a> | <a href="#">190 - 63</a>  | (-) |
| <b>GXP_500389</b> [ <a href="#">GXP_500389</a> ] (1 - 777)<br><b>Slc4a1</b> , GXL_319400, GeneID: 24779, Rattus norvegicus chr. 10<br>solute carrier family 4, member 1                             | <a href="#">neur-nr2f</a> | <a href="#">732 - 580</a> | (-) |
| <b>GXP_500611</b> [ <a href="#">GXP_500611</a> ] (1 - 601)<br><b>Sox9</b> , GXL_319475, GeneID: 140586, Rattus norvegicus chr. 10<br>SRY-box containing gene 9                                      | <a href="#">neur-nr2f</a> | <a href="#">162 - 36</a>  | (-) |
| <b>GXP_500703</b> [ <a href="#">GXP_500703</a> ] (1 - 686)<br><b>Pcnt1</b> , GXL_319519, GeneID: 287830, Rattus norvegicus chr. 10<br>pericentrin 1                                                 | <a href="#">neur-nr2f</a> | <a href="#">517 - 373</a> | (-) |
| <b>GXP_1403479</b> [ <a href="#">GXP_1403479</a> ] (1 - 601)<br><b>Mif4gd</b> , GXL_319521, GeneID: 360659, Rattus norvegicus chr. 10<br>MIF4G domain containing                                    | <a href="#">neur-nr2f</a> | <a href="#">208 - 356</a> | (+) |
| <b>GXP_1148706</b> [ <a href="#">GXP_1148706</a> ] (1 - 601)<br><b>Srp68 predicted</b> , GXL_319532, GeneID: 363707, Rattus norvegicus chr. 10<br>signal recognition particle 68 (predicted)        | <a href="#">neur-nr2f</a> | <a href="#">332 - 202</a> | (-) |
|                                                                                                                                                                                                     | <a href="#">neur-nr2f</a> | <a href="#">242 - 363</a> | (+) |

|                                                                                                                                                                                             |                           |                           |     |
|---------------------------------------------------------------------------------------------------------------------------------------------------------------------------------------------|---------------------------|---------------------------|-----|
| <b>GXP_501064</b> [ <a href="#">GXP_501064</a> ] (1 - 614)<br><b>Mx1</b> , GXL_319662, GeneID: 24575, Rattus norvegicus chr. 11<br>myxovirus (influenza virus) resistance 1                 | <a href="#">neur-nr2f</a> | <a href="#">379 - 496</a> | (+) |
| <b>GXP_1404070</b> [ <a href="#">GXP_1404070</a> ] (1 - 601)<br><b>Chrd</b> , GXL_319834, GeneID: 117275, Rattus norvegicus chr. 11<br>chordin                                              | <a href="#">neur-nr2f</a> | <a href="#">181 - 302</a> | (+) |
| <b>GXP_501696</b> [ <a href="#">GXP_501696</a> ] (1 - 708)<br><b>Lrrc8e</b> , GXL_319899, GeneID: 304203, Rattus norvegicus chr. 12<br>leucine rich repeat containing 8 family, member E    | <a href="#">neur-nr2f</a> | <a href="#">312 - 187</a> | (-) |
| <b>GXP_502069</b> [ <a href="#">GXP_502069</a> ] (1 - 1094)<br><b>Mospd3</b> , GXL_320050, GeneID: 288557, Rattus norvegicus chr. 12<br>motile sperm domain containing 3                    | <a href="#">neur-nr2f</a> | <a href="#">849 - 972</a> | (+) |
| <b>GXP_502097</b> [ <a href="#">GXP_502097</a> ] (1 - 855)<br><b>Cldn15_predicted</b> , GXL_320067, GeneID: 304388, Rattus norvegicus chr. 12<br>claudin 15 (predicted)                     | <a href="#">neur-nr2f</a> | <a href="#">175 - 303</a> | (+) |
| <b>GXP_502242</b> [ <a href="#">GXP_502242</a> ] (1 - 601)<br><b>Ncor2_predicted</b> , GXL_320117, GeneID: 360801, Rattus norvegicus chr. 12<br>nuclear receptor co-repressor 2 (predicted) | <a href="#">neur-nr2f</a> | <a href="#">209 - 343</a> | (+) |
| <b>GXP_502370</b> [ <a href="#">GXP_502370</a> ] (1 - 735)<br><b>Fln29</b> , GXL_320155, GeneID: 114635, Rattus norvegicus chr. 12<br>FLN29 gene product                                    | <a href="#">neur-nr2f</a> | <a href="#">411 - 286</a> | (-) |
| <b>GXP_1404979</b> [ <a href="#">GXP_1404979</a> ] (1 - 601)<br><b>Glrx2</b> , GXL_320365, GeneID: 114022, Rattus norvegicus chr. 13<br>glutaredoxin 2 (thioltransferase)                   | <a href="#">neur-nr2f</a> | <a href="#">238 - 388</a> | (+) |
| <b>GXP_503409</b> [ <a href="#">GXP_503409</a> ] (1 - 982)<br><b>Sccpdh</b> , GXL_320546, GeneID: 305021, Rattus norvegicus chr. 13<br>saccharopine dehydrogenase (putative)                | <a href="#">neur-nr2f</a> | <a href="#">68 - 216</a>  | (+) |
| <b>GXP_1152196</b> [ <a href="#">GXP_1152196</a> ] (1 - 601)<br><b>Tbc1d10a</b> , GXL_320906, GeneID: 360968, Rattus norvegicus chr. 14<br>TBC1 domain family, member 10a                   | <a href="#">neur-nr2f</a> | <a href="#">174 - 288</a> | (+) |
| <b>GXP_1406007</b> [ <a href="#">GXP_1406007</a> ] (1 - 629)<br><b>Upp1</b> , GXL_320941, GeneID: 289801, Rattus norvegicus chr. 14<br>uridine phosphorylase 1                              | <a href="#">neur-nr2f</a> | <a href="#">357 - 510</a> | (+) |
| <b>GXP_1406109</b> [ <a href="#">GXP_1406109</a> ] (1 - 1187)<br><b>Spnb2</b> , GXL_321003, GeneID: 305614, Rattus norvegicus chr. 14<br>spectrin beta 2                                    | <a href="#">neur-nr2f</a> | <a href="#">132 - 280</a> | (+) |
| <b>GXP_1406325</b> [ <a href="#">GXP_1406325</a> ] (1 - 602)<br><b>Acin1</b> , GXL_321206, GeneID: 305884, Rattus norvegicus chr. 15<br>apoptotic chromatin condensation inducer 1          | <a href="#">neur-nr2f</a> | <a href="#">450 - 308</a> | (-) |
|                                                                                                                                                                                             | <a href="#">neur-nr2f</a> | <a href="#">413 - 533</a> | (+) |

|                                                                                                                                                                                                                  |                           |                           |     |
|------------------------------------------------------------------------------------------------------------------------------------------------------------------------------------------------------------------|---------------------------|---------------------------|-----|
| <b>GXP_1406355</b> [ <a href="#">GXP_1406355</a> ] (1 - 1059)<br><b>Gmpr2</b> , GXL_321224, GeneID: 192357, Rattus norvegicus chr. 15<br>guanosine monophosphate reductase 2                                     |                           |                           |     |
| <b>GXP_505414</b> [ <a href="#">GXP_505414</a> ] (1 - 601)<br><b>Ppp3cc</b> , GXL_321338, GeneID: 171378, Rattus norvegicus chr. 15<br>protein phosphatase 3, catalytic subunit, gamma isoform                   | <a href="#">neur-nr2f</a> | <a href="#">274 - 425</a> | (+) |
| <b>GXP_1406512</b> [ <a href="#">GXP_1406512</a> ] (1 - 602)<br><b>Ppp3cc</b> , GXL_321338, GeneID: 171378, Rattus norvegicus chr. 15<br>protein phosphatase 3, catalytic subunit, gamma isoform                 | <a href="#">neur-nr2f</a> | <a href="#">218 - 350</a> | (+) |
| <b>GXP_505542</b> [ <a href="#">GXP_505542</a> ] (1 - 1108)<br><b>Wbp4</b> , GXL_321382, GeneID: 114765, Rattus norvegicus chr. 15<br>WW domain binding protein 4                                                | <a href="#">neur-nr2f</a> | <a href="#">362 - 243</a> | (-) |
| <b>GXP_505737</b> [ <a href="#">GXP_505737</a> ] (1 - 601)<br><b>Actr8_predicted</b> , GXL_321459, GeneID: 361107, Rattus norvegicus chr. 16<br>ARP8 actin-related protein 8 homolog (S. cerevisiae) (predicted) | <a href="#">neur-nr2f</a> | <a href="#">304 - 445</a> | (+) |
| <b>GXP_1406822</b> [ <a href="#">GXP_1406822</a> ] (1 - 601)<br><b>Tspan14_predicted</b> , GXL_321535, GeneID: 306324, Rattus norvegicus chr. 16<br>tetraspanin 14 (predicted)                                   | <a href="#">neur-nr2f</a> | <a href="#">536 - 388</a> | (-) |
| <b>GXP_506476</b> [ <a href="#">GXP_506476</a> ] (1 - 635)<br><b>Defb12</b> , GXL_321760, GeneID: 641643, Rattus norvegicus chr. 16<br>defensin beta 12                                                          | <a href="#">neur-nr2f</a> | <a href="#">403 - 289</a> | (-) |
| <b>GXP_507580</b> [ <a href="#">GXP_507580</a> ] (1 - 1195)<br><b>Nol4_predicted</b> , GXL_322266, GeneID: 307553, Rattus norvegicus chr. 18<br>nucleolar protein 4 (predicted)                                  | <a href="#">neur-nr2f</a> | <a href="#">153 - 306</a> | (+) |
| <b>GXP_1407784</b> [ <a href="#">GXP_1407784</a> ] (1 - 601)<br><b>Nol4_predicted</b> , GXL_322266, GeneID: 307553, Rattus norvegicus chr. 18<br>nucleolar protein 4 (predicted)                                 | <a href="#">neur-nr2f</a> | <a href="#">437 - 590</a> | (+) |
| <b>GXP_1407812</b> [ <a href="#">GXP_1407812</a> ] (1 - 603)<br><b>Wdr33_predicted</b> , GXL_322289, GeneID: 307524, Rattus norvegicus chr. 18<br>WD repeat domain 33 (predicted)                                | <a href="#">neur-nr2f</a> | <a href="#">235 - 89</a>  | (-) |
| <b>GXP_507963</b> [ <a href="#">GXP_507963</a> ] (1 - 817)<br><b>Pde6a_predicted</b> , GXL_322424, GeneID: 307401, Rattus norvegicus chr. 18<br>phosphodiesterase 6A, cGMP-specific, rod, alpha (predicted)      | <a href="#">neur-nr2f</a> | <a href="#">4 - 134</a>   | (+) |
| <b>GXP_508193</b> [ <a href="#">GXP_508193</a> ] (1 - 1037)<br><b>Cbln2</b> , GXL_322517, GeneID: 291388, Rattus norvegicus chr. 18<br>cerebellin 2 precursor protein                                            | <a href="#">neur-nr2f</a> | <a href="#">418 - 553</a> | (+) |
| <b>GXP_1408211</b> [ <a href="#">GXP_1408211</a> ] (1 - 750)<br><b>Cmtm3_predicted</b> , GXL_322532, GeneID: 291813, Rattus norvegicus chr. 19<br>CKLF-like MARVEL transmembrane domain containing 3 (predicted) | <a href="#">neur-nr2f</a> | <a href="#">401 - 273</a> | (-) |
|                                                                                                                                                                                                                  | <a href="#">neur-nr2f</a> | <a href="#">486 - 358</a> | (-) |



|                                                                                                                                                                                                                                                 |                           |                           |     |
|-------------------------------------------------------------------------------------------------------------------------------------------------------------------------------------------------------------------------------------------------|---------------------------|---------------------------|-----|
| <b>GXP_1408212</b> [ <a href="#">GXP_1408212</a> ] (1 - 602)<br><b>Cmtm3 predicted</b> , GXL_322532, GeneID: 291813, Rattus norvegicus chr. 19<br>CKLF-like MARVEL transmembrane domain containing 3 (predicted)                                |                           |                           |     |
| <b>GXP_1408246</b> [ <a href="#">GXP_1408246</a> ] (1 - 704)<br><b>Katnb1</b> , GXL_322557, GeneID: 291852, Rattus norvegicus chr. 19<br>katanin p80 (WD40-containing) subunit B 1                                                              | <a href="#">neur-nr2f</a> | <a href="#">669 - 549</a> | (-) |
| <b>GXP_1408398</b> [ <a href="#">GXP_1408398</a> ] (1 - 606)<br><b>Rnaseh2a</b> , GXL_322635, GeneID: 364974, Rattus norvegicus chr. 19<br>ribonuclease H2, large subunit                                                                       | <a href="#">neur-nr2f</a> | <a href="#">229 - 109</a> | (-) |
| <b>GXP_1408608</b> [ <a href="#">GXP_1408608</a> ] (1 - 602)<br><b>Txnl4b</b> , GXL_322725, GeneID: 292008, Rattus norvegicus chr. 19<br>thioredoxin-like 4B                                                                                    | <a href="#">neur-nr2f</a> | <a href="#">182 - 63</a>  | (-) |
| <b>GXP_508945</b> [ <a href="#">GXP_508945</a> ] (1 - 703)<br><b>Aprt predicted</b> , GXL_322795, GeneID: 292072, Rattus norvegicus chr. 19<br>adenine phosphoribosyl transferase (predicted)                                                   | <a href="#">neur-nr2f</a> | <a href="#">240 - 382</a> | (+) |
| <b>GXP_509340</b> [ <a href="#">GXP_509340</a> ] (1 - 674)<br><b>Erc8 predicted</b> , GXL_322948, GeneID: 310071, Rattus norvegicus chr. 2<br>excision repair cross-complementing rodent repair deficiency, complementation group 8 (predicted) | <a href="#">neur-nr2f</a> | <a href="#">280 - 154</a> | (-) |
| <b>GXP_1411861</b> [ <a href="#">GXP_1411861</a> ] (1 - 1180)<br><b>Prlr</b> , GXL_323004, GeneID: 24684, Rattus norvegicus chr. 2<br>prolactin receptor                                                                                        | <a href="#">neur-nr2f</a> | <a href="#">445 - 331</a> | (-) |
| <b>GXP_1412129</b> [ <a href="#">GXP_1412129</a> ] (1 - 602)<br><b>Alg5</b> , GXL_323189, GeneID: 295051, Rattus norvegicus chr. 2<br>asparagine-linked glycosylation 5 homolog (yeast, dolichyl-phosphate beta-glucosyltransferase)            | <a href="#">neur-nr2f</a> | <a href="#">222 - 360</a> | (+) |
| <b>GXP_1412173</b> [ <a href="#">GXP_1412173</a> ] (1 - 601)<br><b>Tiparp predicted</b> , GXL_323223, GeneID: 310467, Rattus norvegicus chr. 2<br>TCDD-inducible poly(ADP-ribose) polymerase (predicted)                                        | <a href="#">neur-nr2f</a> | <a href="#">164 - 316</a> | (+) |
| <b>GXP_510142</b> [ <a href="#">GXP_510142</a> ] (1 - 1065)<br><b>Insrr</b> , GXL_323280, GeneID: 60663, Rattus norvegicus chr. 2<br>insulin receptor-related receptor                                                                          | <a href="#">neur-nr2f</a> | <a href="#">247 - 374</a> | (+) |
| <b>GXP_510390</b> [ <a href="#">GXP_510390</a> ] (1 - 1157)<br><b>Milt11</b> , GXL_323369, GeneID: 295264, Rattus norvegicus chr. 2<br>myeloid/lymphoid or mixed-lineage leukemia (trithorax homolog, Drosophila), translocated to, 11          | <a href="#">neur-nr2f</a> | <a href="#">583 - 716</a> | (+) |
| <b>GXP_1411125</b> [ <a href="#">GXP_1411125</a> ] (1 - 603)<br><b>Gabbr1</b> , GXL_323632, GeneID: 81657, Rattus norvegicus chr. 20<br>gamma-aminobutyric acid (GABA) B receptor 1                                                             | <a href="#">neur-nr2f</a> | <a href="#">377 - 511</a> | (+) |
| <b>GXP_511243</b> [ <a href="#">GXP_511243</a> ] (1 - 638)<br><b>Zfp297</b> , GXL_323657, GeneID: 309630, Rattus norvegicus chr. 20<br>zinc finger protein 297                                                                                  | <a href="#">neur-nr2f</a> | <a href="#">362 - 224</a> | (-) |
|                                                                                                                                                                                                                                                 | <a href="#">neur-nr2f</a> | <a href="#">480 - 342</a> | (-) |

|                                                                                                                                                                                                                          |                           |                           |     |
|--------------------------------------------------------------------------------------------------------------------------------------------------------------------------------------------------------------------------|---------------------------|---------------------------|-----|
| <b>GXP_1160330</b> [ <a href="#">GXP_1160330</a> ] (1 - 601)<br><b>Zfp297</b> , GXL_323657, GeneID: 309630, Rattus norvegicus chr. 20<br>zinc finger protein 297                                                         |                           |                           |     |
| <b>GXP_1411378</b> [ <a href="#">GXP_1411378</a> ] (1 - 601)<br><b>Hrmt1l1</b> , GXL_323724, GeneID: 499420, Rattus norvegicus chr. 20<br>HMT1 hnRNP methyltransferase-like 1 (S. cerevisiae)                            | <a href="#">neur-nr2f</a> | <a href="#">551 - 423</a> | (-) |
| <b>GXP_512408</b> [ <a href="#">GXP_512408</a> ] (1 - 601)<br><b>Nr4a2</b> , GXL_324134, GeneID: 54278, Rattus norvegicus chr. 3<br>nuclear receptor subfamily 4, group A, member 2                                      | <a href="#">neur-nr2f</a> | <a href="#">423 - 553</a> | (+) |
| <b>GXP_1413494</b> [ <a href="#">GXP_1413494</a> ] (1 - 601)<br><b>Pacsin3</b> , GXL_324249, GeneID: 311187, Rattus norvegicus chr. 3<br>protein kinase C and casein kinase substrate in neurons 3                       | <a href="#">neur-nr2f</a> | <a href="#">198 - 83</a>  | (-) |
| <b>GXP_1413497</b> [ <a href="#">GXP_1413497</a> ] (1 - 602)<br><b>Pacsin3</b> , GXL_324249, GeneID: 311187, Rattus norvegicus chr. 3<br>protein kinase C and casein kinase substrate in neurons 3                       | <a href="#">neur-nr2f</a> | <a href="#">65 - 205</a>  | (+) |
| <b>GXP_1413558</b> [ <a href="#">GXP_1413558</a> ] (1 - 602)<br><b>Alkbh3</b> , GXL_324270, GeneID: 362169, Rattus norvegicus chr. 3<br>alkB, alkylation repair homolog 3 (E. coli)                                      | <a href="#">neur-nr2f</a> | <a href="#">383 - 534</a> | (+) |
| <b>GXP_1413591</b> [ <a href="#">GXP_1413591</a> ] (1 - 982)<br><b>Elf5 predicted</b> , GXL_324293, GeneID: 366142, Rattus norvegicus chr. 3<br>E74-like factor 5 (predicted)                                            | <a href="#">neur-nr2f</a> | <a href="#">706 - 850</a> | (+) |
| <b>GXP_1413691</b> [ <a href="#">GXP_1413691</a> ] (1 - 602)<br><b>Eif2ak4 predicted</b> , GXL_324352, GeneID: 114859, Rattus norvegicus chr. 3<br>eukaryotic translation initiation factor 2 alpha kinase 4 (predicted) | <a href="#">neur-nr2f</a> | <a href="#">204 - 76</a>  | (-) |
| <b>GXP_513645</b> [ <a href="#">GXP_513645</a> ] (1 - 642)<br><b>Rem1</b> , GXL_324565, GeneID: 366232, Rattus norvegicus chr. 3<br>rad and gem related GTP binding protein 1                                            | <a href="#">neur-nr2f</a> | <a href="#">546 - 405</a> | (-) |
| <b>GXP_1414173</b> [ <a href="#">GXP_1414173</a> ] (1 - 647)<br><b>Rnpc2</b> , GXL_324607, GeneID: 362251, Rattus norvegicus chr. 3<br>RNA-binding region (RNP1, RRM) containing 2                                       | <a href="#">neur-nr2f</a> | <a href="#">31 - 146</a>  | (+) |
| <b>GXP_1414275</b> [ <a href="#">GXP_1414275</a> ] (1 - 723)<br><b>Tnnc2</b> , GXL_324666, GeneID: 296369, Rattus norvegicus chr. 3<br>troponin C type 2 (fast)                                                          | <a href="#">neur-nr2f</a> | <a href="#">151 - 279</a> | (+) |
| <b>GXP_514209</b> [ <a href="#">GXP_514209</a> ] (1 - 779)<br><b>Polr3k</b> , GXL_324761, GeneID: 366277, Rattus norvegicus chr. 3<br>polymerase (RNA) III (DNA directed) polypeptide K                                  | <a href="#">neur-nr2f</a> | <a href="#">371 - 512</a> | (+) |
| <b>GXP_514312</b> [ <a href="#">GXP_514312</a> ] (1 - 789)<br><b>Lrrc17</b> , GXL_324798, GeneID: 502715, Rattus norvegicus chr. 4<br>leucine rich repeat containing 17                                                  | <a href="#">neur-nr2f</a> | <a href="#">368 - 482</a> | (+) |
|                                                                                                                                                                                                                          | <a href="#">neur-nr2f</a> | <a href="#">408 - 286</a> | (-) |

|                                                                                                                                                                                                                 |                           |                           |     |
|-----------------------------------------------------------------------------------------------------------------------------------------------------------------------------------------------------------------|---------------------------|---------------------------|-----|
| <b>GXP_514538</b> [ <a href="#">GXP_514538</a> ] (1 - 662)<br><b>Wnt16</b> , GXL_324895, GeneID: 500047, Rattus norvegicus chr. 4<br>wingless-related MMTV integration site 16                                  |                           |                           |     |
| <b>GXP_1415148</b> [ <a href="#">GXP_1415148</a> ] (1 - 638)<br><b>Foxp1</b> , GXL_325320, GeneID: 297480, Rattus norvegicus chr. 4<br>forkhead box P1                                                          | <a href="#">neur-nr2f</a> | <a href="#">200 - 345</a> | (+) |
| <b>GXP_1415185</b> [ <a href="#">GXP_1415185</a> ] (1 - 601)<br><b>Cpne9</b> , GXL_325351, GeneID: 297516, Rattus norvegicus chr. 4<br>copine family member IX                                                  | <a href="#">neur-nr2f</a> | <a href="#">237 - 105</a> | (-) |
| <b>GXP_1415278</b> [ <a href="#">GXP_1415278</a> ] (1 - 1000)<br><b>Adipor2</b> , GXL_325391, GeneID: 312670, Rattus norvegicus chr. 4<br>adiponectin receptor 2                                                | <a href="#">neur-nr2f</a> | <a href="#">388 - 521</a> | (+) |
| <b>GXP_1415445</b> [ <a href="#">GXP_1415445</a> ] (1 - 602)<br><b>Ddx47</b> , GXL_325502, GeneID: 297685, Rattus norvegicus chr. 4<br>DEAD (Asp-Glu-Ala-Asp) box polypeptide 47                                | <a href="#">neur-nr2f</a> | <a href="#">272 - 413</a> | (+) |
| <b>GXP_1415558</b> [ <a href="#">GXP_1415558</a> ] (1 - 603)<br><b>Lactb2</b> , GXL_325568, GeneID: 297768, Rattus norvegicus chr. 5<br>lactamase, beta 2                                                       | <a href="#">neur-nr2f</a> | <a href="#">108 - 227</a> | (+) |
| <b>GXP_1415593</b> [ <a href="#">GXP_1415593</a> ] (1 - 602)<br><b>Adhfe1</b> , GXL_325584, GeneID: 362474, Rattus norvegicus chr. 5<br>alcohol dehydrogenase, iron containing, 1                               | <a href="#">neur-nr2f</a> | <a href="#">507 - 361</a> | (-) |
| <b>GXP_516324</b> [ <a href="#">GXP_516324</a> ] (1 - 666)<br><b>Wwp1</b> , GXL_325656, GeneID: 297930, Rattus norvegicus chr. 5<br>WW domain containing E3 ubiquitin protein ligase 1                          | <a href="#">neur-nr2f</a> | <a href="#">167 - 48</a>  | (-) |
| <b>GXP_1415691</b> [ <a href="#">GXP_1415691</a> ] (1 - 602)<br><b>Wwp1</b> , GXL_325656, GeneID: 297930, Rattus norvegicus chr. 5<br>WW domain containing E3 ubiquitin protein ligase 1                        | <a href="#">neur-nr2f</a> | <a href="#">331 - 209</a> | (-) |
| <b>GXP_1415856</b> [ <a href="#">GXP_1415856</a> ] (1 - 601)<br><b>Igfbp1_predicted</b> , GXL_325744, GeneID: 366366, Rattus norvegicus chr. 5<br>insulin-like growth factor binding protein-like 1 (predicted) | <a href="#">neur-nr2f</a> | <a href="#">289 - 164</a> | (-) |
| <b>GXP_519508</b> [ <a href="#">GXP_519508</a> ] (1 - 601)<br><b>Olr991_predicted</b> , GXL_326881, GeneID: 500780, Rattus norvegicus chr. 7<br>olfactory receptor 991 (predicted)                              | <a href="#">neur-nr2f</a> | <a href="#">551 - 404</a> | (-) |
| <b>GXP_1169886</b> [ <a href="#">GXP_1169886</a> ] (1 - 601)<br><b>Rexo1</b> , GXL_326914, GeneID: 314630, Rattus norvegicus chr. 7<br>REX1, RNA exonuclease 1 homolog (S. cerevisiae)                          | <a href="#">neur-nr2f</a> | <a href="#">270 - 387</a> | (+) |
| <b>GXP_1417947</b> [ <a href="#">GXP_1417947</a> ] (1 - 602)<br><b>Tcp11l2</b> , GXL_327008, GeneID: 314683, Rattus norvegicus chr. 7<br>t-complex 11 (mouse) like 2                                            | <a href="#">neur-nr2f</a> | <a href="#">179 - 327</a> | (+) |
|                                                                                                                                                                                                                 | <a href="#">neur-nr2f</a> | <a href="#">519 - 403</a> | (-) |

|                                                                                                                                                                                                            |                           |                             |     |
|------------------------------------------------------------------------------------------------------------------------------------------------------------------------------------------------------------|---------------------------|-----------------------------|-----|
| <b>GXP_1418049</b> [ <a href="#">GXP_1418049</a> ] (1 - 601)<br><b>Dspg3_predicted</b> , GXL_327058, GeneID: 314772, Rattus norvegicus chr. 7<br>dermatan sulphate proteoglycan 3 (predicted)              |                           |                             |     |
| <b>GXP_1418095</b> [ <a href="#">GXP_1418095</a> ] (1 - 601)<br><b>Syt1</b> , GXL_327074, GeneID: 25716, Rattus norvegicus chr. 7<br>synaptotagmin I                                                       | <a href="#">neur-nr2f</a> | <a href="#">478 - 337</a>   | (-) |
| <b>GXP_1170496</b> [ <a href="#">GXP_1170496</a> ] (1 - 601)<br><b>Ankrd46</b> , GXL_327167, GeneID: 299982, Rattus norvegicus chr. 7<br>ankyrin repeat domain 46                                          | <a href="#">neur-nr2f</a> | <a href="#">88 - 241</a>    | (+) |
| <b>GXP_1170923</b> [ <a href="#">GXP_1170923</a> ] (1 - 901)<br><b>Grap2</b> , GXL_327350, GeneID: 366962, Rattus norvegicus chr. 7<br>GRB2-related adaptor protein 2                                      | <a href="#">neur-nr2f</a> | <a href="#">721 - 867</a>   | (+) |
| <b>GXP_1418569</b> [ <a href="#">GXP_1418569</a> ] (1 - 602)<br><b>Pacsin2</b> , GXL_327374, GeneID: 124461, Rattus norvegicus chr. 7<br>protein kinase C and casein kinase substrate in neurons 2         | <a href="#">neur-nr2f</a> | <a href="#">283 - 426</a>   | (+) |
| <b>GXP_521012</b> [ <a href="#">GXP_521012</a> ] (1 - 601)<br><b>Hdac7a</b> , GXL_327444, GeneID: 84582, Rattus norvegicus chr. 7<br>histone deacetylase 7A                                                | <a href="#">neur-nr2f</a> | <a href="#">261 - 147</a>   | (-) |
| <b>GXP_521605</b> [ <a href="#">GXP_521605</a> ] (1 - 601)<br><b>Pvrl1</b> , GXL_327675, GeneID: 192183, Rattus norvegicus chr. 8<br>poliovirus receptor-related 1                                         | <a href="#">neur-nr2f</a> | <a href="#">454 - 571</a>   | (+) |
| <b>GXP_1419250</b> [ <a href="#">GXP_1419250</a> ] (1 - 628)<br><b>Slc35f2_predicted</b> , GXL_327738, GeneID: 300713, Rattus norvegicus chr. 8<br>solute carrier family 35, member F2 (predicted)         | <a href="#">neur-nr2f</a> | <a href="#">169 - 320</a>   | (+) |
| <b>GXP_522431</b> [ <a href="#">GXP_522431</a> ] (1 - 1468)<br><b>Dnajc13_predicted</b> , GXL_327962, GeneID: 363127, Rattus norvegicus chr. 8<br>DnaJ (Hsp40) homolog, subfamily C, member 13 (predicted) | <a href="#">neur-nr2f</a> | <a href="#">1209 - 1070</a> | (-) |
| <b>GXP_1419732</b> [ <a href="#">GXP_1419732</a> ] (1 - 661)<br><b>Pcbp4_predicted</b> , GXL_327974, GeneID: 363133, Rattus norvegicus chr. 8<br>poly(rC) binding protein 4 (predicted)                    | <a href="#">neur-nr2f</a> | <a href="#">357 - 234</a>   | (-) |
| <b>GXP_522593</b> [ <a href="#">GXP_522593</a> ] (1 - 601)<br><b>Ihpk2</b> , GXL_328007, GeneID: 59268, Rattus norvegicus chr. 8<br>inositol hexaphosphate kinase 2                                        | <a href="#">neur-nr2f</a> | <a href="#">2 - 155</a>     | (+) |
| <b>GXP_1419882</b> [ <a href="#">GXP_1419882</a> ] (1 - 1158)<br><b>Dclk3_predicted</b> , GXL_328036, GeneID: 316023, Rattus norvegicus chr. 8<br>doublecortin-like kinase 3 (predicted)                   | <a href="#">neur-nr2f</a> | <a href="#">251 - 369</a>   | (+) |
| <b>GXP_522781</b> [ <a href="#">GXP_522781</a> ] (1 - 601)<br><b>Xylb</b> , GXL_328071, GeneID: 316067, Rattus norvegicus chr. 8<br>xylulokinase homolog (H. influenzae)                                   | <a href="#">neur-nr2f</a> | <a href="#">471 - 341</a>   | (-) |
|                                                                                                                                                                                                            | <a href="#">neur-nr2f</a> | <a href="#">157 - 38</a>    | (-) |

|                                                                                                                                                                                                               |                           |                           |     |
|---------------------------------------------------------------------------------------------------------------------------------------------------------------------------------------------------------------|---------------------------|---------------------------|-----|
| <b>GXP_1172853</b> [ <a href="#">GXP_1172853</a> ] (1 - 601)<br><b>Gup1 predicted</b> , GXL_328085, GeneID: 301073, Rattus norvegicus chr. 8<br>Gup1, glycerol uptake/transporter homolog (yeast) (predicted) |                           |                           |     |
| <b>GXP_1420678</b> [ <a href="#">GXP_1420678</a> ] (1 - 612)<br><b>Hes6</b> , GXL_328463, GeneID: 316626, Rattus norvegicus chr. 9<br>hairy and enhancer of split 6 (Drosophila)                              | <a href="#">neur-nr2f</a> | <a href="#">517 - 370</a> | (-) |
| <b>GXP_1420842</b> [ <a href="#">GXP_1420842</a> ] (1 - 601)<br><b>Dock11</b> , GXL_328563, GeneID: 313438, Rattus norvegicus chr. X<br>dedicator of cytokinesis 11                                           | <a href="#">neur-nr2f</a> | <a href="#">330 - 189</a> | (-) |
| <b>GXP_1420874</b> [ <a href="#">GXP_1420874</a> ] (1 - 602)<br><b>Fundc1</b> , GXL_328587, GeneID: 363442, Rattus norvegicus chr. X<br>FUN14 domain containing 1                                             | <a href="#">neur-nr2f</a> | <a href="#">146 - 24</a>  | (-) |
| <b>GXP_1174372</b> [ <a href="#">GXP_1174372</a> ] (1 - 601)<br><b>Maged2</b> , GXL_328670, GeneID: 113947, Rattus norvegicus chr. X<br>melanoma antigen, family D, 2                                         | <a href="#">neur-nr2f</a> | <a href="#">177 - 40</a>  | (-) |
| <b>GXP_1421017</b> [ <a href="#">GXP_1421017</a> ] (1 - 602)<br><b>Msl31</b> , GXL_328689, GeneID: 317464, Rattus norvegicus chr. X<br>male-specific lethal-3 homolog 1 (Drosophila)                          | <a href="#">neur-nr2f</a> | <a href="#">191 - 308</a> | (+) |
| <b>GXP_1175246</b> [ <a href="#">GXP_1175246</a> ] (1 - 601)<br><b>Irak1 predicted</b> , GXL_329031, GeneID: 363520, Rattus norvegicus chr. X<br>interleukin-1 receptor-associated kinase 1 (predicted)       | <a href="#">neur-nr2f</a> | <a href="#">249 - 111</a> | (-) |
| <b>GXP_1408994</b> [ <a href="#">GXP_1408994</a> ] (1 - 602)<br><b>Fndc1</b> , GXL_467842, GeneID: 308099, Rattus norvegicus chr. 1<br>fibronectin type III domain containing 1                               | <a href="#">neur-nr2f</a> | <a href="#">426 - 547</a> | (+) |
| <b>GXP_1409621</b> [ <a href="#">GXP_1409621</a> ] (1 - 602)<br><b>Nell1</b> , GXL_467904, GeneID: 81733, Rattus norvegicus chr. 1<br>NEL-like 1 (chicken)                                                    | <a href="#">neur-nr2f</a> | <a href="#">256 - 120</a> | (-) |
| <b>GXP_850097</b> [ <a href="#">GXP_850097</a> ] (1 - 601)<br><b>Olr233 predicted</b> , GXL_467936, GeneID: 293377, Rattus norvegicus chr. 1<br>olfactory receptor 233 (predicted)                            | <a href="#">neur-nr2f</a> | <a href="#">325 - 173</a> | (-) |
| <b>GXP_851427</b> [ <a href="#">GXP_851427</a> ] (1 - 601)<br><b>Olr1388 predicted</b> , GXL_468002, GeneID: 405066, Rattus norvegicus chr. 10<br>olfactory receptor 1388 (predicted)                         | <a href="#">neur-nr2f</a> | <a href="#">106 - 251</a> | (+) |
| <b>GXP_852869</b> [ <a href="#">GXP_852869</a> ] (1 - 1101)<br><b>Trp63</b> , GXL_468112, GeneID: 246334, Rattus norvegicus chr. 11<br>transformation related protein 63                                      | <a href="#">neur-nr2f</a> | <a href="#">777 - 928</a> | (+) |
| <b>GXP_1404310</b> [ <a href="#">GXP_1404310</a> ] (1 - 607)<br><b>Kiaa0415</b> , GXL_468145, GeneID: 641386, Rattus norvegicus chr. 12<br>KIAA0415 protein                                                   | <a href="#">neur-nr2f</a> | <a href="#">329 - 479</a> | (+) |
|                                                                                                                                                                                                               | <a href="#">neur-nr2f</a> | <a href="#">752 - 635</a> | (-) |

|                                                                                                                                                                                                            |                           |                           |     |
|------------------------------------------------------------------------------------------------------------------------------------------------------------------------------------------------------------|---------------------------|---------------------------|-----|
| <b>GXP_1404312</b> [ <a href="#">GXP_1404312</a> ] (1 - 1111)<br><b>Kiaa0415</b> , GXL_468145, GeneID: 641386, Rattus norvegicus chr. 12<br>KIAA0415 protein                                               |                           |                           |     |
| <b>GXP_1404867</b> [ <a href="#">GXP_1404867</a> ] (1 - 601)<br><b>Nfasc</b> , GXL_468187, GeneID: 116690, Rattus norvegicus chr. 13<br>neurofascin                                                        | <a href="#">neur-nr2f</a> | <a href="#">535 - 406</a> | (-) |
| <b>GXP_1405357</b> [ <a href="#">GXP_1405357</a> ] (1 - 601)<br><b>Rab3gap2</b> , GXL_468217, GeneID: 289350, Rattus norvegicus chr. 13<br>RAB3 GTPase activating protein subunit 2                        | <a href="#">neur-nr2f</a> | <a href="#">203 - 61</a>  | (-) |
| <b>GXP_855159</b> [ <a href="#">GXP_855159</a> ] (1 - 1068)<br><b>Hr</b> , GXL_468319, GeneID: 60563, Rattus norvegicus chr. 15<br>hairless homolog (mouse)                                                | <a href="#">neur-nr2f</a> | <a href="#">777 - 923</a> | (+) |
| <b>GXP_856343</b> [ <a href="#">GXP_856343</a> ] (1 - 605)<br><b>B4galt6</b> , GXL_468416, GeneID: 65196, Rattus norvegicus chr. 18<br>UDP-Gal:betaGlcNAc beta 1,4-galactosyltransferase, polypeptide 6    | <a href="#">neur-nr2f</a> | <a href="#">329 - 481</a> | (+) |
| <b>GXP_856667</b> [ <a href="#">GXP_856667</a> ] (1 - 601)<br><b>Slc14a2</b> , GXL_468437, GeneID: 54302, Rattus norvegicus chr. 18<br>solute carrier family 14 (urea transporter), member 2               | <a href="#">neur-nr2f</a> | <a href="#">165 - 291</a> | (+) |
| <b>GXP_1408700</b> [ <a href="#">GXP_1408700</a> ] (1 - 601)<br><b>Efcbp2</b> , GXL_468485, GeneID: 170928, Rattus norvegicus chr. 19<br>EF hand calcium binding protein 2                                 | <a href="#">neur-nr2f</a> | <a href="#">85 - 210</a>  | (+) |
| <b>GXP_858122</b> [ <a href="#">GXP_858122</a> ] (1 - 1206)<br><b>Magi3</b> , GXL_468542, GeneID: 245903, Rattus norvegicus chr. 2<br>membrane associated guanylate kinase, WW and PDZ domain containing 3 | <a href="#">neur-nr2f</a> | <a href="#">31 - 177</a>  | (+) |
| <b>GXP_859449</b> [ <a href="#">GXP_859449</a> ] (1 - 601)<br><b>Olr681_predicted</b> , GXL_468659, GeneID: 404824, Rattus norvegicus chr. 3<br>olfactory receptor 681 (predicted)                         | <a href="#">neur-nr2f</a> | <a href="#">38 - 185</a>  | (+) |
| <b>GXP_1413488</b> [ <a href="#">GXP_1413488</a> ] (1 - 601)<br><b>Madd</b> , GXL_468665, GeneID: 94193, Rattus norvegicus chr. 3<br>MAP-kinase activating death domain                                    | <a href="#">neur-nr2f</a> | <a href="#">161 - 15</a>  | (-) |
| <b>GXP_862296</b> [ <a href="#">GXP_862296</a> ] (1 - 697)<br><b>Spata21</b> , GXL_468836, GeneID: 366491, Rattus norvegicus chr. 5<br>spermatogenesis associated 21                                       | <a href="#">neur-nr2f</a> | <a href="#">381 - 248</a> | (-) |
| <b>GXP_1417517</b> [ <a href="#">GXP_1417517</a> ] (1 - 602)<br><b>Zdhhc22</b> , GXL_468867, GeneID: 299211, Rattus norvegicus chr. 6<br>zinc finger, DHHC-type containing 22                              | <a href="#">neur-nr2f</a> | <a href="#">455 - 578</a> | (+) |
| <b>GXP_1417816</b> [ <a href="#">GXP_1417816</a> ] (1 - 601)<br><b>Pias4</b> , GXL_468901, GeneID: 362827, Rattus norvegicus chr. 7<br>protein inhibitor of activated STAT, 4                              | <a href="#">neur-nr2f</a> | <a href="#">53 - 205</a>  | (+) |
|                                                                                                                                                                                                            | <a href="#">neur-nr2f</a> | <a href="#">174 - 319</a> | (+) |

|                                                                                                                                                                                                                           |                           |                            |     |
|---------------------------------------------------------------------------------------------------------------------------------------------------------------------------------------------------------------------------|---------------------------|----------------------------|-----|
| <b>GXP_865913</b> [ <a href="#">GXP_865913</a> ] (1 - 858)<br><b>Sag</b> , GXL_469070, GeneID: 25539, Rattus norvegicus chr. 9<br>retinal S-antigen                                                                       |                           |                            |     |
| <b>GXP_1402231</b> [ <a href="#">GXP_1402231</a> ] (1 - 1455)<br><b>Srrm2_predicted</b> , GXL_621399, GeneID: 302969, Rattus norvegicus chr. 10<br>serine/arginine repetitive matrix 2 (predicted)                        | <a href="#">neur-nr2f</a> | <a href="#">905 - 1032</a> | (+) |
| <b>GXP_1147398</b> [ <a href="#">GXP_1147398</a> ] (1 - 661)<br><b>Zfp39_predicted</b> , GXL_621557, GeneID: 303173, Rattus norvegicus chr. 10<br>zinc finger protein 39 (predicted)                                      | <a href="#">neur-nr2f</a> | <a href="#">399 - 547</a>  | (+) |
| <b>GXP_1147500</b> [ <a href="#">GXP_1147500</a> ] (1 - 1020)<br><b>Zfp287_predicted</b> , GXL_621598, GeneID: 303212, Rattus norvegicus chr. 10<br>zinc finger protein 287 (predicted)                                   | <a href="#">neur-nr2f</a> | <a href="#">464 - 344</a>  | (-) |
| <b>GXP_1147504</b> [ <a href="#">GXP_1147504</a> ] (1 - 853)<br><b>Trim16_predicted</b> , GXL_621600, GeneID: 303214, Rattus norvegicus chr. 10<br>tripartite motif protein 16 (predicted)                                | <a href="#">neur-nr2f</a> | <a href="#">758 - 622</a>  | (-) |
| <b>GXP_1402653</b> [ <a href="#">GXP_1402653</a> ] (1 - 602)<br><b>Arhgef15_predicted</b> , GXL_621629, GeneID: 287418, Rattus norvegicus chr. 10<br>Rho guanine nucleotide exchange factor (GEF) 15 (predicted)          | <a href="#">neur-nr2f</a> | <a href="#">595 - 456</a>  | (-) |
| <b>GXP_1147661</b> [ <a href="#">GXP_1147661</a> ] (1 - 668)<br><b>Alox12_predicted</b> , GXL_621651, GeneID: 287454, Rattus norvegicus chr. 10<br>arachidonate 12-lipoxygenase (predicted)                               | <a href="#">neur-nr2f</a> | <a href="#">141 - 23</a>   | (-) |
| <b>GXP_1147665</b> [ <a href="#">GXP_1147665</a> ] (1 - 917)<br><b>Tm4sf5_predicted</b> , GXL_621653, GeneID: 303256, Rattus norvegicus chr. 10<br>transmembrane 4 superfamily member 5 (predicted)                       | <a href="#">neur-nr2f</a> | <a href="#">580 - 733</a>  | (+) |
| <b>GXP_1402812</b> [ <a href="#">GXP_1402812</a> ] (1 - 668)<br><b>Rpa1</b> , GXL_621694, GeneID: 287524, Rattus norvegicus chr. 10<br>replication protein A1                                                             | <a href="#">neur-nr2f</a> | <a href="#">275 - 143</a>  | (-) |
| <b>GXP_1147786</b> [ <a href="#">GXP_1147786</a> ] (1 - 709)<br><b>Smyd4_predicted</b> , GXL_621695, GeneID: 287525, Rattus norvegicus chr. 10<br>SET and MYND domain containing 4 (predicted)                            | <a href="#">neur-nr2f</a> | <a href="#">565 - 697</a>  | (+) |
| <b>GXP_1147943</b> [ <a href="#">GXP_1147943</a> ] (1 - 791)<br><b>Psm11_predicted</b> , GXL_621742, GeneID: 303353, Rattus norvegicus chr. 10<br>proteasome (prosome, macropain) 26S subunit, non-ATPase, 11 (predicted) | <a href="#">neur-nr2f</a> | <a href="#">496 - 357</a>  | (-) |
| <b>GXP_1403019</b> [ <a href="#">GXP_1403019</a> ] (1 - 602)<br><b>Tex14_predicted</b> , GXL_621783, GeneID: 287603, Rattus norvegicus chr. 10<br>testis expressed gene 14 (predicted)                                    | <a href="#">neur-nr2f</a> | <a href="#">565 - 412</a>  | (-) |
| <b>GXP_1403022</b> [ <a href="#">GXP_1403022</a> ] (1 - 602)<br><b>Tex14_predicted</b> , GXL_621783, GeneID: 287603, Rattus norvegicus chr. 10<br>testis expressed gene 14 (predicted)                                    | <a href="#">neur-nr2f</a> | <a href="#">530 - 395</a>  | (-) |
|                                                                                                                                                                                                                           | <a href="#">neur-nr2f</a> | <a href="#">380 - 532</a>  | (+) |

|                                                                                                                                                                                                            |                           |                           |     |
|------------------------------------------------------------------------------------------------------------------------------------------------------------------------------------------------------------|---------------------------|---------------------------|-----|
| <b>GXP_1403032</b> [ <a href="#">GXP_1403032</a> ] (1 - 602)<br><b>Mpo</b> , GXL_621789, GeneID: 303413, Rattus norvegicus chr. 10<br>myeloperoxidase                                                      |                           |                           |     |
| <b>GXP_1403095</b> [ <a href="#">GXP_1403095</a> ] (1 - 601)<br><b>Itga3_predicted</b> , GXL_621819, GeneID: 360606, Rattus norvegicus chr. 10<br>integrin alpha 3 (predicted)                             | <a href="#">neur-nr2f</a> | <a href="#">161 - 43</a>  | (-) |
| <b>GXP_1403116</b> [ <a href="#">GXP_1403116</a> ] (1 - 601)<br><b>Ttl6_predicted</b> , GXL_621826, GeneID: 287646, Rattus norvegicus chr. 10<br>tubulin tyrosine ligase-like family, member 6 (predicted) | <a href="#">neur-nr2f</a> | <a href="#">189 - 310</a> | (+) |
| <b>GXP_1403139</b> [ <a href="#">GXP_1403139</a> ] (1 - 712)<br><b>Osbpl7_predicted</b> , GXL_621835, GeneID: 303497, Rattus norvegicus chr. 10<br>oxysterol binding protein-like 7 (predicted)            | <a href="#">neur-nr2f</a> | <a href="#">270 - 153</a> | (-) |
| <b>GXP_1403198</b> [ <a href="#">GXP_1403198</a> ] (1 - 681)<br><b>Cdc6_predicted</b> , GXL_621855, GeneID: 360621, Rattus norvegicus chr. 10<br>cell division cycle 6 homolog (S. cerevisiae) (predicted) | <a href="#">neur-nr2f</a> | <a href="#">434 - 580</a> | (+) |
| <b>GXP_1403199</b> [ <a href="#">GXP_1403199</a> ] (1 - 602)<br><b>Cdc6_predicted</b> , GXL_621855, GeneID: 360621, Rattus norvegicus chr. 10<br>cell division cycle 6 homolog (S. cerevisiae) (predicted) | <a href="#">neur-nr2f</a> | <a href="#">91 - 237</a>  | (+) |
| <b>GXP_1403395</b> [ <a href="#">GXP_1403395</a> ] (1 - 639)<br><b>Helz_predicted</b> , GXL_621941, GeneID: 287773, Rattus norvegicus chr. 10<br>helicase with zinc finger domain (predicted)              | <a href="#">neur-nr2f</a> | <a href="#">264 - 121</a> | (-) |
| <b>GXP_1403435</b> [ <a href="#">GXP_1403435</a> ] (1 - 627)<br><b>Sdk2_predicted</b> , GXL_621962, GeneID: 360652, Rattus norvegicus chr. 10<br>sidekick homolog 2 (chicken) (predicted)                  | <a href="#">neur-nr2f</a> | <a href="#">377 - 237</a> | (-) |
| <b>GXP_1148637</b> [ <a href="#">GXP_1148637</a> ] (1 - 602)<br><b>Ush1g_predicted</b> , GXL_621983, GeneID: 287819, Rattus norvegicus chr. 10<br>Usher syndrome 1G homolog (human) (predicted)            | <a href="#">neur-nr2f</a> | <a href="#">355 - 486</a> | (+) |
| <b>GXP_1403550</b> [ <a href="#">GXP_1403550</a> ] (1 - 601)<br><b>Usp36_predicted</b> , GXL_622018, GeneID: 303700, Rattus norvegicus chr. 10<br>ubiquitin specific protease 36 (predicted)               | <a href="#">neur-nr2f</a> | <a href="#">382 - 251</a> | (-) |
| <b>GXP_1403678</b> [ <a href="#">GXP_1403678</a> ] (1 - 601)<br><b>Sfrs15</b> , GXL_622113, GeneID: 245924, Rattus norvegicus chr. 11<br>splicing factor, arginine/serine-rich 15                          | <a href="#">neur-nr2f</a> | <a href="#">136 - 10</a>  | (-) |
| <b>GXP_1403764</b> [ <a href="#">GXP_1403764</a> ] (1 - 727)<br><b>Prdm15_predicted</b> , GXL_622141, GeneID: 304054, Rattus norvegicus chr. 11<br>PR domain containing 15 (predicted)                     | <a href="#">neur-nr2f</a> | <a href="#">238 - 87</a>  | (-) |
| <b>GXP_1403767</b> [ <a href="#">GXP_1403767</a> ] (1 - 602)<br><b>Zfp295_predicted</b> , GXL_622143, GeneID: 304056, Rattus norvegicus chr. 11<br>zinc finger protein 295 (predicted)                     | <a href="#">neur-nr2f</a> | <a href="#">345 - 483</a> | (+) |
|                                                                                                                                                                                                            | <a href="#">neur-nr2f</a> | <a href="#">104 - 243</a> | (+) |



|                                                                                                                                                                                                             |                           |                           |     |
|-------------------------------------------------------------------------------------------------------------------------------------------------------------------------------------------------------------|---------------------------|---------------------------|-----|
| <b>GXP_1403919</b> [ <a href="#">GXP_1403919</a> ] (1 - 607)<br><b>Mylk predicted</b> , GXL_622247, GeneID: 288057, Rattus norvegicus chr. 11<br>myosin, light polypeptide kinase (predicted)               |                           |                           |     |
| <b>GXP_1149546</b> [ <a href="#">GXP_1149546</a> ] (1 - 601)<br><b>Vpreb1</b> , GXL_622337, GeneID: 303782, Rattus norvegicus chr. 11<br>pre-B lymphocyte gene 1                                            | <a href="#">neur-nr2f</a> | <a href="#">199 - 61</a>  | (-) |
| <b>GXP_1404165</b> [ <a href="#">GXP_1404165</a> ] (1 - 602)<br><b>Lass4 predicted</b> , GXL_622360, GeneID: 304208, Rattus norvegicus chr. 12<br>longevity assurance homolog 4 (S. cerevisiae) (predicted) | <a href="#">neur-nr2f</a> | <a href="#">428 - 300</a> | (-) |
| <b>GXP_1404179</b> [ <a href="#">GXP_1404179</a> ] (1 - 1379)<br><b>Pcp2</b> , GXL_622379, GeneID: 304195, Rattus norvegicus chr. 12<br>Purkinje cell protein 2 (L7)                                        | <a href="#">neur-nr2f</a> | <a href="#">667 - 543</a> | (-) |
| <b>GXP_1149855</b> [ <a href="#">GXP_1149855</a> ] (1 - 665)<br><b>Zfp68 predicted</b> , GXL_622474, GeneID: 304337, Rattus norvegicus chr. 12<br>zinc finger protein 68 (predicted)                        | <a href="#">neur-nr2f</a> | <a href="#">379 - 498</a> | (+) |
| <b>GXP_1150117</b> [ <a href="#">GXP_1150117</a> ] (1 - 1090)<br><b>Rimbp2</b> , GXL_622582, GeneID: 266780, Rattus norvegicus chr. 12<br>RIM binding protein 2                                             | <a href="#">neur-nr2f</a> | <a href="#">387 - 533</a> | (+) |
| <b>GXP_1404548</b> [ <a href="#">GXP_1404548</a> ] (1 - 601)<br><b>Fbxl10</b> , GXL_622620, GeneID: 304495, Rattus norvegicus chr. 12<br>F-box and leucine-rich repeat protein 10                           | <a href="#">neur-nr2f</a> | <a href="#">424 - 305</a> | (-) |
| <b>GXP_1404552</b> [ <a href="#">GXP_1404552</a> ] (1 - 602)<br><b>Anapc5 predicted</b> , GXL_622621, GeneID: 288671, Rattus norvegicus chr. 12<br>anaphase-promoting complex subunit 5 (predicted)         | <a href="#">neur-nr2f</a> | <a href="#">141 - 17</a>  | (-) |
| <b>GXP_1150310</b> [ <a href="#">GXP_1150310</a> ] (1 - 726)<br><b>Fbxw8 predicted</b> , GXL_622645, GeneID: 304522, Rattus norvegicus chr. 12<br>F-box and WD-40 domain protein 8 (predicted)              | <a href="#">neur-nr2f</a> | <a href="#">590 - 449</a> | (-) |
| <b>GXP_1150323</b> [ <a href="#">GXP_1150323</a> ] (1 - 601)<br><b>Rfc5 predicted</b> , GXL_622650, GeneID: 304528, Rattus norvegicus chr. 12<br>replication factor C (activator 1) 5 (predicted)           | <a href="#">neur-nr2f</a> | <a href="#">32 - 180</a>  | (+) |
| <b>GXP_1404695</b> [ <a href="#">GXP_1404695</a> ] (1 - 601)<br><b>Usp30 predicted</b> , GXL_622671, GeneID: 304579, Rattus norvegicus chr. 12<br>ubiquitin specific protease 30 (predicted)                | <a href="#">neur-nr2f</a> | <a href="#">395 - 535</a> | (+) |
| <b>GXP_1150622</b> [ <a href="#">GXP_1150622</a> ] (1 - 876)<br><b>Elk4 predicted</b> , GXL_622774, GeneID: 304786, Rattus norvegicus chr. 13<br>ELK4, member of ETS oncogene family (predicted)            | <a href="#">neur-nr2f</a> | <a href="#">183 - 330</a> | (+) |
| <b>GXP_1405068</b> [ <a href="#">GXP_1405068</a> ] (1 - 601)<br><b>Tdrd5 predicted</b> , GXL_622875, GeneID: 289129, Rattus norvegicus chr. 13<br>tudor domain containing 5 (predicted)                     | <a href="#">neur-nr2f</a> | <a href="#">329 - 199</a> | (-) |
|                                                                                                                                                                                                             | <a href="#">neur-nr2f</a> | <a href="#">808 - 663</a> | (-) |

|                                                                                                                                                                                                                         |                           |                           |     |
|-------------------------------------------------------------------------------------------------------------------------------------------------------------------------------------------------------------------------|---------------------------|---------------------------|-----|
| <b>GXP_1151143</b> [ <a href="#">GXP_1151143</a> ] (1 - 823)<br><b>Slamf8 predicted</b> , GXL_622971, GeneID: 289237, Rattus norvegicus chr. 13<br>SLAM family member 8 (predicted)                                     |                           |                           |     |
| <b>GXP_1405815</b> [ <a href="#">GXP_1405815</a> ] (1 - 946)<br><b>Zfp509 predicted</b> , GXL_623347, GeneID: 305428, Rattus norvegicus chr. 14<br>zinc finger protein 509 (predicted)                                  | <a href="#">neur-nr2f</a> | <a href="#">764 - 635</a> | (-) |
| <b>GXP_1152178</b> [ <a href="#">GXP_1152178</a> ] (1 - 601)<br><b>Smtn</b> , GXL_623388, GeneID: 289734, Rattus norvegicus chr. 14<br>smoothelin                                                                       | <a href="#">neur-nr2f</a> | <a href="#">462 - 340</a> | (-) |
| <b>GXP_1405925</b> [ <a href="#">GXP_1405925</a> ] (1 - 601)<br><b>Smtn</b> , GXL_623388, GeneID: 289734, Rattus norvegicus chr. 14<br>smoothelin                                                                       | <a href="#">neur-nr2f</a> | <a href="#">369 - 223</a> | (-) |
| <b>GXP_1152317</b> [ <a href="#">GXP_1152317</a> ] (1 - 1111)<br><b>Spred2</b> , GXL_623442, GeneID: 305539, Rattus norvegicus chr. 14<br>sprouty-related, EVH1 domain containing 2                                     | <a href="#">neur-nr2f</a> | <a href="#">13 - 144</a>  | (+) |
| <b>GXP_1406113</b> [ <a href="#">GXP_1406113</a> ] (1 - 601)<br><b>Psme4</b> , GXL_623488, GeneID: 498433, Rattus norvegicus chr. 14<br>proteasome (prosome, macropain) activator subunit 4                             | <a href="#">neur-nr2f</a> | <a href="#">388 - 261</a> | (-) |
| <b>GXP_1406114</b> [ <a href="#">GXP_1406114</a> ] (1 - 601)<br><b>Psme4</b> , GXL_623488, GeneID: 498433, Rattus norvegicus chr. 14<br>proteasome (prosome, macropain) activator subunit 4                             | <a href="#">neur-nr2f</a> | <a href="#">385 - 258</a> | (-) |
| <b>GXP_1406147</b> [ <a href="#">GXP_1406147</a> ] (1 - 601)<br><b>Ndst2 predicted</b> , GXL_623497, GeneID: 114002, Rattus norvegicus chr. 15<br>N-deacetylase/N-sulfotransferase (heparan glucosaminyl) 2 (predicted) | <a href="#">neur-nr2f</a> | <a href="#">245 - 395</a> | (+) |
| <b>GXP_1406339</b> [ <a href="#">GXP_1406339</a> ] (1 - 850)<br><b>Pck2 predicted</b> , GXL_623657, GeneID: 361042, Rattus norvegicus chr. 15<br>phosphoenolpyruvate carboxykinase 2 (mitochondrial) (predicted)        | <a href="#">neur-nr2f</a> | <a href="#">646 - 496</a> | (-) |
| <b>GXP_1152860</b> [ <a href="#">GXP_1152860</a> ] (1 - 601)<br><b>Mcpt4l1</b> , GXL_623662, GeneID: 408208, Rattus norvegicus chr. 15<br>mast cell protease 4-like 1                                                   | <a href="#">neur-nr2f</a> | <a href="#">96 - 230</a>  | (+) |
| <b>GXP_1406376</b> [ <a href="#">GXP_1406376</a> ] (1 - 655)<br><b>Adprt1l</b> , GXL_623681, GeneID: 361046, Rattus norvegicus chr. 15<br>ADP-ribosyltransferase (NAD+, poly (ADP-ribose) polymerase)-like 1            | <a href="#">neur-nr2f</a> | <a href="#">425 - 272</a> | (-) |
| <b>GXP_1152997</b> [ <a href="#">GXP_1152997</a> ] (1 - 704)<br><b>Pbk predicted</b> , GXL_623725, GeneID: 290326, Rattus norvegicus chr. 15<br>PDZ binding kinase (predicted)                                          | <a href="#">neur-nr2f</a> | <a href="#">361 - 491</a> | (+) |
| <b>GXP_1406666</b> [ <a href="#">GXP_1406666</a> ] (1 - 603)<br><b>Dock9</b> , GXL_623860, GeneID: 259237, Rattus norvegicus chr. 15<br>dedicator of cytokinesis 9                                                      | <a href="#">neur-nr2f</a> | <a href="#">105 - 232</a> | (+) |
|                                                                                                                                                                                                                         | <a href="#">neur-nr2f</a> | <a href="#">128 - 250</a> | (+) |

|                                                                                                                                                                                                                                 |                           |                           |     |
|---------------------------------------------------------------------------------------------------------------------------------------------------------------------------------------------------------------------------------|---------------------------|---------------------------|-----|
| <b>GXP_1406698</b> [ <a href="#">GXP_1406698</a> ] (1 - 601)<br><b>Simap_predicted</b> , GXL_623881, GeneID: 290533, Rattus norvegicus chr. 16<br>sarcolemma associated protein (predicted)                                     |                           |                           |     |
| <b>GXP_1153440</b> [ <a href="#">GXP_1153440</a> ] (1 - 668)<br><b>Sema3g</b> , GXL_623906, GeneID: 290562, Rattus norvegicus chr. 16<br>sema domain, immunoglobulin domain (Ig), short basic domain, secreted, (semaphorin) 3G | <a href="#">neur-nr2f</a> | <a href="#">630 - 506</a> | (-) |
| <b>GXP_1153489</b> [ <a href="#">GXP_1153489</a> ] (1 - 601)<br><b>Zfp488_predicted</b> , GXL_623925, GeneID: 290571, Rattus norvegicus chr. 16<br>zinc finger protein 488 (predicted)                                          | <a href="#">neur-nr2f</a> | <a href="#">456 - 333</a> | (-) |
| <b>GXP_1153557</b> [ <a href="#">GXP_1153557</a> ] (1 - 884)<br><b>Sh2d4b_predicted</b> , GXL_623966, GeneID: 290612, Rattus norvegicus chr. 16<br>SH2 domain containing 4B (predicted)                                         | <a href="#">neur-nr2f</a> | <a href="#">381 - 256</a> | (-) |
| <b>GXP_1406841</b> [ <a href="#">GXP_1406841</a> ] (1 - 602)<br><b>Ap1m1</b> , GXL_623970, GeneID: 306332, Rattus norvegicus chr. 16<br>adaptor-related protein complex AP-1, mu subunit 1                                      | <a href="#">neur-nr2f</a> | <a href="#">438 - 295</a> | (-) |
| <b>GXP_1153905</b> [ <a href="#">GXP_1153905</a> ] (1 - 602)<br><b>F11</b> , GXL_624109, GeneID: 290757, Rattus norvegicus chr. 16<br>coagulation factor XI                                                                     | <a href="#">neur-nr2f</a> | <a href="#">425 - 566</a> | (+) |
| <b>GXP_1407037</b> [ <a href="#">GXP_1407037</a> ] (1 - 601)<br><b>Sgcz_predicted</b> , GXL_624130, GeneID: 364605, Rattus norvegicus chr. 16<br>sarcoglycan zeta (predicted)                                                   | <a href="#">neur-nr2f</a> | <a href="#">419 - 299</a> | (-) |
| <b>GXP_1154071</b> [ <a href="#">GXP_1154071</a> ] (1 - 616)<br><b>Myst3</b> , GXL_624182, GeneID: 306571, Rattus norvegicus chr. 16<br>MYST histone acetyltransferase (monocytic leukemia) 3                                   | <a href="#">neur-nr2f</a> | <a href="#">201 - 332</a> | (+) |
| <b>GXP_1407119</b> [ <a href="#">GXP_1407119</a> ] (1 - 687)<br><b>Thsd1_predicted</b> , GXL_624187, GeneID: 364630, Rattus norvegicus chr. 16<br>thrombospondin, type I, domain 1 (predicted)                                  | <a href="#">neur-nr2f</a> | <a href="#">44 - 191</a>  | (+) |
| <b>GXP_1154097</b> [ <a href="#">GXP_1154097</a> ] (1 - 601)<br><b>RatNP-3b</b> , GXL_624193, GeneID: 498659, Rattus norvegicus chr. 16<br>defensin RatNP-3 precursor                                                           | <a href="#">neur-nr2f</a> | <a href="#">314 - 175</a> | (-) |
| <b>GXP_1154299</b> [ <a href="#">GXP_1154299</a> ] (1 - 601)<br><b>Trpc7</b> , GXL_624287, GeneID: 282822, Rattus norvegicus chr. 17<br>transient receptor potential cation channel, subfamily C, member 7                      | <a href="#">neur-nr2f</a> | <a href="#">212 - 66</a>  | (-) |
| <b>GXP_1407296</b> [ <a href="#">GXP_1407296</a> ] (1 - 601)<br><b>Dok3_predicted</b> , GXL_624300, GeneID: 306760, Rattus norvegicus chr. 17<br>docking protein 3 (predicted)                                                  | <a href="#">neur-nr2f</a> | <a href="#">200 - 68</a>  | (-) |
| <b>GXP_1154452</b> [ <a href="#">GXP_1154452</a> ] (1 - 601)<br><b>Zfp169_predicted</b> , GXL_624351, GeneID: 306816, Rattus norvegicus chr. 17<br>zinc finger protein 169 (predicted)                                          | <a href="#">neur-nr2f</a> | <a href="#">105 - 238</a> | (+) |
|                                                                                                                                                                                                                                 | <a href="#">neur-nr2f</a> | <a href="#">435 - 555</a> | (+) |

|                                                                                                                                                                                                                      |                           |                           |     |
|----------------------------------------------------------------------------------------------------------------------------------------------------------------------------------------------------------------------|---------------------------|---------------------------|-----|
| <b>GXP_1407483</b> [ <a href="#">GXP_1407483</a> ] (1 - 601)<br><b>Lrrc16 predicted</b> , GXL_624439, GeneID: 306941, Rattus norvegicus chr. 17<br>leucine rich repeat containing 16 (predicted)                     |                           |                           |     |
| <b>GXP_1407509</b> [ <a href="#">GXP_1407509</a> ] (1 - 603)<br><b>Gli3</b> , GXL_624494, GeneID: 140588, Rattus norvegicus chr. 17<br>GLI-Kruppel family member GLI3                                                | <a href="#">neur-nr2f</a> | <a href="#">218 - 343</a> | (+) |
| <b>GXP_1407640</b> [ <a href="#">GXP_1407640</a> ] (1 - 601)<br><b>Usp6nl predicted</b> , GXL_624591, GeneID: 291309, Rattus norvegicus chr. 17<br>USP6 N-terminal like (predicted)                                  | <a href="#">neur-nr2f</a> | <a href="#">157 - 32</a>  | (-) |
| <b>GXP_1407641</b> [ <a href="#">GXP_1407641</a> ] (1 - 1018)<br><b>Upf2 predicted</b> , GXL_624592, GeneID: 361271, Rattus norvegicus chr. 17<br>UPF2 regulator of nonsense transcripts homolog (yeast) (predicted) | <a href="#">neur-nr2f</a> | <a href="#">291 - 411</a> | (+) |
| <b>GXP_1155048</b> [ <a href="#">GXP_1155048</a> ] (1 - 601)<br><b>Gpr158 predicted</b> , GXL_624644, GeneID: 291352, Rattus norvegicus chr. 17<br>G protein-coupled receptor 158 (predicted)                        | <a href="#">neur-nr2f</a> | <a href="#">419 - 302</a> | (-) |
| <b>GXP_1155148</b> [ <a href="#">GXP_1155148</a> ] (1 - 601)<br><b>Dsc1 predicted</b> , GXL_624692, GeneID: 291759, Rattus norvegicus chr. 18<br>desmocollin 1 (predicted)                                           | <a href="#">neur-nr2f</a> | <a href="#">210 - 338</a> | (+) |
| <b>GXP_1155345</b> [ <a href="#">GXP_1155345</a> ] (1 - 607)<br><b>Pcdhb18</b> , GXL_624773, GeneID: 548105, Rattus norvegicus chr. 18<br>protocadherin beta 18                                                      | <a href="#">neur-nr2f</a> | <a href="#">429 - 294</a> | (-) |
| <b>GXP_1407914</b> [ <a href="#">GXP_1407914</a> ] (1 - 602)<br><b>Arhgap26 predicted</b> , GXL_624790, GeneID: 307459, Rattus norvegicus chr. 18<br>Rho GTPase activating protein 26 (predicted)                    | <a href="#">neur-nr2f</a> | <a href="#">130 - 270</a> | (+) |
| <b>GXP_1155429</b> [ <a href="#">GXP_1155429</a> ] (1 - 601)<br><b>Dcp2 predicted</b> , GXL_624809, GeneID: 291604, Rattus norvegicus chr. 18<br>DCP2 decapping enzyme homolog (S. cerevisiae) (predicted)           | <a href="#">neur-nr2f</a> | <a href="#">448 - 330</a> | (-) |
| <b>GXP_1155474</b> [ <a href="#">GXP_1155474</a> ] (1 - 601)<br><b>Tnfaip8 predicted</b> , GXL_624839, GeneID: 307428, Rattus norvegicus chr. 18<br>tumor necrosis factor, alpha-induced protein 8 (predicted)       | <a href="#">neur-nr2f</a> | <a href="#">445 - 571</a> | (+) |
| <b>GXP_1407972</b> [ <a href="#">GXP_1407972</a> ] (1 - 602)<br><b>Sncaip predicted</b> , GXL_624846, GeneID: 307309, Rattus norvegicus chr. 18<br>synuclein, alpha interacting protein (synphilin) (predicted)      | <a href="#">neur-nr2f</a> | <a href="#">117 - 2</a>   | (-) |
| <b>GXP_1155633</b> [ <a href="#">GXP_1155633</a> ] (1 - 897)<br><b>Spire1 predicted</b> , GXL_624909, GeneID: 307348, Rattus norvegicus chr. 18<br>spire homolog 1 (Drosophila) (predicted)                          | <a href="#">neur-nr2f</a> | <a href="#">119 - 2</a>   | (-) |
| <b>GXP_1155821</b> [ <a href="#">GXP_1155821</a> ] (1 - 601)<br><b>Cd226 predicted</b> , GXL_624983, GeneID: 307199, Rattus norvegicus chr. 18<br>CD226 antigen (predicted)                                          | <a href="#">neur-nr2f</a> | <a href="#">321 - 202</a> | (-) |
|                                                                                                                                                                                                                      | <a href="#">neur-nr2f</a> | <a href="#">285 - 133</a> | (-) |

|                                                                                                                                                                                                                                                   |                           |                           |     |
|---------------------------------------------------------------------------------------------------------------------------------------------------------------------------------------------------------------------------------------------------|---------------------------|---------------------------|-----|
| <b>GXP_1408337</b> [ <a href="#">GXP_1408337</a> ] (1 - 605)<br><b>Nkd1_predicted</b> , GXL_625056, GeneID: 364952, Rattus norvegicus chr. 19<br>naked cuticle 1 homolog (Drosophila) (predicted)                                                 |                           |                           |     |
| <b>GXP_1156023</b> [ <a href="#">GXP_1156023</a> ] (1 - 1072)<br><b>Brd7_predicted</b> , GXL_625057, GeneID: 361374, Rattus norvegicus chr. 19<br>bromodomain containing 7 (predicted)                                                            | <a href="#">neur-nr2f</a> | <a href="#">507 - 375</a> | (-) |
| <b>GXP_1408393</b> [ <a href="#">GXP_1408393</a> ] (1 - 601)<br><b>Tnpo2_predicted</b> , GXL_625105, GeneID: 304670, Rattus norvegicus chr. 19<br>transportin 2 (importin 3, karyopherin beta 2b) (predicted)                                     | <a href="#">neur-nr2f</a> | <a href="#">131 - 254</a> | (+) |
| <b>GXP_1408424</b> [ <a href="#">GXP_1408424</a> ] (1 - 602)<br><b>Zswim4_predicted</b> , GXL_625113, GeneID: 304655, Rattus norvegicus chr. 19<br>zinc finger, SWIM domain containing 4 (predicted)                                              | <a href="#">neur-nr2f</a> | <a href="#">12 - 154</a>  | (+) |
| <b>GXP_1408559</b> [ <a href="#">GXP_1408559</a> ] (1 - 603)<br><b>Rbm35b_predicted</b> , GXL_625172, GeneID: 307810, Rattus norvegicus chr. 19<br>RNA binding motif protein 35b (predicted)                                                      | <a href="#">neur-nr2f</a> | <a href="#">502 - 356</a> | (-) |
| <b>GXP_1408716</b> [ <a href="#">GXP_1408716</a> ] (1 - 618)<br><b>Cotl1_predicted</b> , GXL_625234, GeneID: 361422, Rattus norvegicus chr. 19<br>coactosin-like 1 (Dictyostelium) (predicted)                                                    | <a href="#">neur-nr2f</a> | <a href="#">392 - 521</a> | (+) |
| <b>GXP_1408741</b> [ <a href="#">GXP_1408741</a> ] (1 - 602)<br><b>Snai3_predicted</b> , GXL_625250, GeneID: 307919, Rattus norvegicus chr. 19<br>snail homolog 3 (Drosophila) (predicted)                                                        | <a href="#">neur-nr2f</a> | <a href="#">374 - 514</a> | (+) |
| <b>GXP_1156599</b> [ <a href="#">GXP_1156599</a> ] (1 - 601)<br><b>Sult5a1_predicted</b> , GXL_625259, GeneID: 292077, Rattus norvegicus chr. 19<br>sulfotransferase family 5A, member 1 (predicted)                                              | <a href="#">neur-nr2f</a> | <a href="#">308 - 162</a> | (-) |
| <b>GXP_1156626</b> [ <a href="#">GXP_1156626</a> ] (1 - 601)<br><b>Galnt2_predicted</b> , GXL_625271, GeneID: 292090, Rattus norvegicus chr. 19<br>UDP-N-acetyl-alpha-D-galactosamine:polypeptide N-acetylgalactosaminyltransferase 2 (predicted) | <a href="#">neur-nr2f</a> | <a href="#">33 - 185</a>  | (+) |
| <b>GXP_1408784</b> [ <a href="#">GXP_1408784</a> ] (1 - 601)<br><b>Pgbd5_predicted</b> , GXL_625272, GeneID: 292098, Rattus norvegicus chr. 19<br>piggyBac transposable element derived 5 (predicted)                                             | <a href="#">neur-nr2f</a> | <a href="#">335 - 480</a> | (+) |
| <b>GXP_1408926</b> [ <a href="#">GXP_1408926</a> ] (1 - 601)<br><b>Slc12a7</b> , GXL_625399, GeneID: 308069, Rattus norvegicus chr. 1<br>solute carrier family 12 (potassium/chloride transporters), member 7                                     | <a href="#">neur-nr2f</a> | <a href="#">74 - 215</a>  | (+) |
| <b>GXP_1409018</b> [ <a href="#">GXP_1409018</a> ] (1 - 601)<br><b>Rnaset2_predicted</b> , GXL_625455, GeneID: 292306, Rattus norvegicus chr. 1<br>ribonuclease T2 (predicted)                                                                    | <a href="#">neur-nr2f</a> | <a href="#">9 - 130</a>   | (+) |
| <b>GXP_1157118</b> [ <a href="#">GXP_1157118</a> ] (1 - 680)<br><b>Wdr27_predicted</b> , GXL_625523, GeneID: 308222, Rattus norvegicus chr. 1<br>WD repeat domain 27 (predicted)                                                                  | <a href="#">neur-nr2f</a> | <a href="#">409 - 260</a> | (-) |
|                                                                                                                                                                                                                                                   | <a href="#">neur-nr2f</a> | <a href="#">105 - 251</a> | (+) |

|                                                                                                                                                                                                                                                   |                           |                           |     |
|---------------------------------------------------------------------------------------------------------------------------------------------------------------------------------------------------------------------------------------------------|---------------------------|---------------------------|-----|
| <b>GXP_1409107</b> [ <a href="#">GXP_1409107</a> ] (1 - 633)<br><b>Ptprh</b> , GXL_625649, GeneID: 171125, Rattus norvegicus chr. 1<br>protein tyrosine phosphatase, receptor type, H                                                             |                           |                           |     |
| <b>GXP_1157805</b> [ <a href="#">GXP_1157805</a> ] (1 - 601)<br><b>Etsrp71 predicted</b> , GXL_625853, GeneID: 361544, Rattus norvegicus chr. 1<br>ets related protein 71 (predicted)                                                             | <a href="#">neur-nr2f</a> | <a href="#">456 - 589</a> | (+) |
| <b>GXP_1409417</b> [ <a href="#">GXP_1409417</a> ] (1 - 601)<br><b>Ankrd27 predicted</b> , GXL_625880, GeneID: 361555, Rattus norvegicus chr. 1<br>ankyrin repeat domain 27 (VPS9 domain) (predicted)                                             | <a href="#">neur-nr2f</a> | <a href="#">506 - 360</a> | (-) |
| <b>GXP_1157955</b> [ <a href="#">GXP_1157955</a> ] (1 - 601)<br><b>Klk5</b> , GXL_625921, GeneID: 408211, Rattus norvegicus chr. 1<br>kallikrein 5                                                                                                | <a href="#">neur-nr2f</a> | <a href="#">425 - 289</a> | (-) |
| <b>GXP_1409520</b> [ <a href="#">GXP_1409520</a> ] (1 - 634)<br><b>Trpm4</b> , GXL_625939, GeneID: 171143, Rattus norvegicus chr. 1<br>transient receptor potential cation channel, subfamily M, member 4                                         | <a href="#">neur-nr2f</a> | <a href="#">385 - 538</a> | (+) |
| <b>GXP_1409526</b> [ <a href="#">GXP_1409526</a> ] (1 - 601)<br><b>Ppfia3</b> , GXL_625940, GeneID: 140591, Rattus norvegicus chr. 1<br>protein tyrosine phosphatase, receptor type, f polypeptide (PTPRF), interacting protein (liprin), alpha 3 | <a href="#">neur-nr2f</a> | <a href="#">574 - 443</a> | (-) |
| <b>GXP_1409595</b> [ <a href="#">GXP_1409595</a> ] (1 - 621)<br><b>Tph1</b> , GXL_625955, GeneID: 24848, Rattus norvegicus chr. 1<br>tryptophan hydroxylase 1                                                                                     | <a href="#">neur-nr2f</a> | <a href="#">376 - 513</a> | (+) |
| <b>GXP_1409630</b> [ <a href="#">GXP_1409630</a> ] (1 - 602)<br><b>Tubgcp5 predicted</b> , GXL_625983, GeneID: 308663, Rattus norvegicus chr. 1<br>tubulin, gamma complex associated protein 5 (predicted)                                        | <a href="#">neur-nr2f</a> | <a href="#">335 - 459</a> | (+) |
| <b>GXP_1158193</b> [ <a href="#">GXP_1158193</a> ] (1 - 601)<br><b>Mkrn3 predicted</b> , GXL_625996, GeneID: 292988, Rattus norvegicus chr. 1<br>makorin, ring finger protein, 3 (predicted)                                                      | <a href="#">neur-nr2f</a> | <a href="#">523 - 371</a> | (-) |
| <b>GXP_1409783</b> [ <a href="#">GXP_1409783</a> ] (1 - 601)<br><b>Nmb predicted</b> , GXL_626062, GeneID: 308751, Rattus norvegicus chr. 1<br>neuromedin B (predicted)                                                                           | <a href="#">neur-nr2f</a> | <a href="#">377 - 525</a> | (+) |
| <b>GXP_1409824</b> [ <a href="#">GXP_1409824</a> ] (1 - 948)<br><b>Eed predicted</b> , GXL_626092, GeneID: 293104, Rattus norvegicus chr. 1<br>embryonic ectoderm development (predicted)                                                         | <a href="#">neur-nr2f</a> | <a href="#">744 - 618</a> | (-) |
| <b>GXP_1409937</b> [ <a href="#">GXP_1409937</a> ] (1 - 619)<br><b>Centd2</b> , GXL_626139, GeneID: 361617, Rattus norvegicus chr. 1<br>centaurin, delta 2                                                                                        | <a href="#">neur-nr2f</a> | <a href="#">167 - 282</a> | (+) |
| <b>GXP_1158688</b> [ <a href="#">GXP_1158688</a> ] (1 - 629)<br><b>Nalp10 predicted</b> , GXL_626184, GeneID: 293426, Rattus norvegicus chr. 1<br>NACHT, leucine rich repeat and PYD containing 10 (predicted)                                    | <a href="#">neur-nr2f</a> | <a href="#">232 - 364</a> | (+) |
|                                                                                                                                                                                                                                                   | <a href="#">neur-nr2f</a> | <a href="#">223 - 108</a> | (-) |

|                                                                                                                                                                                                                                  |                           |                           |     |
|----------------------------------------------------------------------------------------------------------------------------------------------------------------------------------------------------------------------------------|---------------------------|---------------------------|-----|
| <b>GXP_1158698</b> [ <a href="#">GXP_1158698</a> ] (1 - 602)<br><b>St5 predicted</b> , GXL_626189, GeneID: 308944, Rattus norvegicus chr. 1<br>suppression of tumorigenicity 5 (predicted)                                       |                           |                           |     |
| <b>GXP_1410050</b> [ <a href="#">GXP_1410050</a> ] (1 - 754)<br><b>Mrv1 predicted</b> , GXL_626198, GeneID: 308899, Rattus norvegicus chr. 1<br>MRV integration site 1 homolog (mouse) (predicted)                               | <a href="#">neur-nr2f</a> | <a href="#">97 - 245</a>  | (+) |
| <b>GXP_1410222</b> [ <a href="#">GXP_1410222</a> ] (1 - 601)<br><b>Gdpd3 predicted</b> , GXL_626271, GeneID: 293490, Rattus norvegicus chr. 1<br>glycerophosphodiester phosphodiesterase domain containing 3 (predicted)         | <a href="#">neur-nr2f</a> | <a href="#">552 - 408</a> | (-) |
| <b>GXP_1158984</b> [ <a href="#">GXP_1158984</a> ] (1 - 601)<br><b>Seps2</b> , GXL_626279, GeneID: 308993, Rattus norvegicus chr. 1<br>selenophosphate synthetase 2                                                              | <a href="#">neur-nr2f</a> | <a href="#">413 - 294</a> | (-) |
| <b>GXP_1410449</b> [ <a href="#">GXP_1410449</a> ] (1 - 619)<br><b>Th</b> , GXL_626397, GeneID: 25085, Rattus norvegicus chr. 1<br>tyrosine hydroxylase                                                                          | <a href="#">neur-nr2f</a> | <a href="#">71 - 185</a>  | (+) |
| <b>GXP_1410557</b> [ <a href="#">GXP_1410557</a> ] (1 - 601)<br><b>Sf3b2 predicted</b> , GXL_626437, GeneID: 293671, Rattus norvegicus chr. 1<br>splicing factor 3b, subunit 2 (predicted)                                       | <a href="#">neur-nr2f</a> | <a href="#">207 - 67</a>  | (-) |
| <b>GXP_1159619</b> [ <a href="#">GXP_1159619</a> ] (1 - 824)<br><b>Vwce predicted</b> , GXL_626496, GeneID: 309209, Rattus norvegicus chr. 1<br>von Willebrand factor C and EGF domains (predicted)                              | <a href="#">neur-nr2f</a> | <a href="#">82 - 203</a>  | (+) |
| <b>GXP_1159640</b> [ <a href="#">GXP_1159640</a> ] (1 - 601)<br><b>Ms4a12 predicted</b> , GXL_626504, GeneID: 293741, Rattus norvegicus chr. 1<br>membrane-spanning 4-domains, subfamily A, member 12 (predicted)                | <a href="#">neur-nr2f</a> | <a href="#">326 - 449</a> | (+) |
| <b>GXP_1410730</b> [ <a href="#">GXP_1410730</a> ] (1 - 602)<br><b>Dtx4</b> , GXL_626518, GeneID: 293774, Rattus norvegicus chr. 1<br>deltex 4 homolog (Drosophila)                                                              | <a href="#">neur-nr2f</a> | <a href="#">158 - 276</a> | (+) |
| <b>GXP_1410753</b> [ <a href="#">GXP_1410753</a> ] (1 - 602)<br><b>Trpm6</b> , GXL_626536, GeneID: 293874, Rattus norvegicus chr. 1<br>transient receptor potential cation channel, subfamily M, member 6                        | <a href="#">neur-nr2f</a> | <a href="#">201 - 79</a>  | (-) |
| <b>GXP_1410767</b> [ <a href="#">GXP_1410767</a> ] (1 - 632)<br><b>Tmem2 predicted</b> , GXL_626545, GeneID: 309400, Rattus norvegicus chr. 1<br>transmembrane protein 2 (predicted)                                             | <a href="#">neur-nr2f</a> | <a href="#">68 - 187</a>  | (+) |
| <b>GXP_1410886</b> [ <a href="#">GXP_1410886</a> ] (1 - 602)<br><b>Tnks2 predicted</b> , GXL_626601, GeneID: 309512, Rattus norvegicus chr. 1<br>tankyrase, TRF1-interacting ankyrin-related ADP-ribose polymerase 2 (predicted) | <a href="#">neur-nr2f</a> | <a href="#">566 - 413</a> | (-) |
| <b>GXP_1159919</b> [ <a href="#">GXP_1159919</a> ] (1 - 601)<br><b>Cyp2c6</b> , GXL_626619, GeneID: 246070, Rattus norvegicus chr. 1<br>Cytochrome P450, subfamily IIC6                                                          | <a href="#">neur-nr2f</a> | <a href="#">152 - 7</a>   | (-) |
|                                                                                                                                                                                                                                  | <a href="#">neur-nr2f</a> | <a href="#">25 - 150</a>  | (+) |

|                                                                                                                                                                                                                                             |                           |                           |     |
|---------------------------------------------------------------------------------------------------------------------------------------------------------------------------------------------------------------------------------------------|---------------------------|---------------------------|-----|
| <b>GXP_1410968</b> [ <a href="#">GXP_1410968</a> ] (1 - 602)<br><b>Wnt8b_predicted</b> , GXL_626648, GeneID: 293990, Rattus norvegicus chr. 1<br>wingless related MMTV integration site 8b (predicted)                                      |                           |                           |     |
| <b>GXP_1161060</b> [ <a href="#">GXP_1161060</a> ] (1 - 641)<br><b>Ptcd2_predicted</b> , GXL_627077, GeneID: 310025, Rattus norvegicus chr. 2<br>pentatricopeptide repeat domain 2 (predicted)                                              | <a href="#">neur-nr2f</a> | <a href="#">98 - 243</a>  | (+) |
| <b>GXP_1411990</b> [ <a href="#">GXP_1411990</a> ] (1 - 602)<br><b>Hps3_predicted</b> , GXL_627266, GeneID: 310288, Rattus norvegicus chr. 2<br>Hermansky-Pudlak syndrome 3 homolog (human) (predicted)                                     | <a href="#">neur-nr2f</a> | <a href="#">274 - 408</a> | (+) |
| <b>GXP_1412065</b> [ <a href="#">GXP_1412065</a> ] (1 - 601)<br><b>Dcun1d1_predicted</b> , GXL_627310, GeneID: 310324, Rattus norvegicus chr. 2<br>DCN1, defective in cullin neddylation 1, domain containing 1 (S. cerevisiae) (predicted) | <a href="#">neur-nr2f</a> | <a href="#">149 - 266</a> | (+) |
| <b>GXP_1161619</b> [ <a href="#">GXP_1161619</a> ] (1 - 720)<br><b>Ccna2</b> , GXL_627314, GeneID: 114494, Rattus norvegicus chr. 2<br>cyclin A2                                                                                            | <a href="#">neur-nr2f</a> | <a href="#">280 - 433</a> | (+) |
| <b>GXP_1412157</b> [ <a href="#">GXP_1412157</a> ] (1 - 707)<br><b>Mbnl1</b> , GXL_627393, GeneID: 282635, Rattus norvegicus chr. 2<br>muscleblind-like 1 (Drosophila)                                                                      | <a href="#">neur-nr2f</a> | <a href="#">588 - 463</a> | (-) |
| <b>GXP_1162115</b> [ <a href="#">GXP_1162115</a> ] (1 - 601)<br><b>Fig</b> , GXL_627534, GeneID: 24641, Rattus norvegicus chr. 2<br>filaggrin                                                                                               | <a href="#">neur-nr2f</a> | <a href="#">207 - 65</a>  | (-) |
| <b>GXP_1412499</b> [ <a href="#">GXP_1412499</a> ] (1 - 601)<br><b>Igsf3_predicted</b> , GXL_627624, GeneID: 295325, Rattus norvegicus chr. 2<br>immunoglobulin superfamily, member 3 (predicted)                                           | <a href="#">neur-nr2f</a> | <a href="#">470 - 347</a> | (-) |
| <b>GXP_1412693</b> [ <a href="#">GXP_1412693</a> ] (1 - 726)<br><b>Bcar3_predicted</b> , GXL_627714, GeneID: 310838, Rattus norvegicus chr. 2<br>breast cancer anti-estrogen resistance 3 (predicted)                                       | <a href="#">neur-nr2f</a> | <a href="#">97 - 240</a>  | (+) |
| <b>GXP_1412694</b> [ <a href="#">GXP_1412694</a> ] (1 - 602)<br><b>Bcar3_predicted</b> , GXL_627714, GeneID: 310838, Rattus norvegicus chr. 2<br>breast cancer anti-estrogen resistance 3 (predicted)                                       | <a href="#">neur-nr2f</a> | <a href="#">254 - 137</a> | (-) |
| <b>GXP_1412695</b> [ <a href="#">GXP_1412695</a> ] (1 - 601)<br><b>Bcar3_predicted</b> , GXL_627714, GeneID: 310838, Rattus norvegicus chr. 2<br>breast cancer anti-estrogen resistance 3 (predicted)                                       | <a href="#">neur-nr2f</a> | <a href="#">408 - 523</a> | (+) |
| <b>GXP_1412763</b> [ <a href="#">GXP_1412763</a> ] (1 - 602)<br><b>Bdh2_predicted</b> , GXL_627763, GeneID: 295458, Rattus norvegicus chr. 2<br>3-hydroxybutyrate dehydrogenase, type 2 (predicted)                                         | <a href="#">neur-nr2f</a> | <a href="#">276 - 153</a> | (-) |
| <b>GXP_1162729</b> [ <a href="#">GXP_1162729</a> ] (1 - 833)<br><b>Clca2_predicted</b> , GXL_627795, GeneID: 308016, Rattus norvegicus chr. 2<br>chloride channel, calcium activated, family member 2 (predicted)                           | <a href="#">neur-nr2f</a> | <a href="#">650 - 771</a> | (+) |
|                                                                                                                                                                                                                                             | <a href="#">neur-nr2f</a> | <a href="#">150 - 268</a> | (+) |



|                                                                                                                                                                                                                    |                           |                           |     |
|--------------------------------------------------------------------------------------------------------------------------------------------------------------------------------------------------------------------|---------------------------|---------------------------|-----|
| <b>GXP_1412988</b> [ <a href="#">GXP_1412988</a> ] (1 - 611)<br><b>Brd3_predicted</b> , GXL_627914, GeneID: 362092, Rattus norvegicus chr. 3<br>bromodomain containing 3 (predicted)                               |                           |                           |     |
| <b>GXP_1163046</b> [ <a href="#">GXP_1163046</a> ] (1 - 1036)<br><b>Ntnq2_predicted</b> , GXL_627926, GeneID: 311836, Rattus norvegicus chr. 3<br>netrin G2 (predicted)                                            | <a href="#">neur-nr2f</a> | <a href="#">240 - 115</a> | (-) |
| <b>GXP_1163090</b> [ <a href="#">GXP_1163090</a> ] (1 - 808)<br><b>Ppp2r4_predicted</b> , GXL_627937, GeneID: 362102, Rattus norvegicus chr. 3<br>protein phosphatase 2A, regulatory subunit B (PR 53) (predicted) | <a href="#">neur-nr2f</a> | <a href="#">752 - 889</a> | (+) |
| <b>GXP_1413094</b> [ <a href="#">GXP_1413094</a> ] (1 - 602)<br><b>Ciz1_predicted</b> , GXL_627953, GeneID: 296639, Rattus norvegicus chr. 3<br>CDKN1A interacting zinc finger protein 1 (predicted)               | <a href="#">neur-nr2f</a> | <a href="#">768 - 649</a> | (-) |
| <b>GXP_1163546</b> [ <a href="#">GXP_1163546</a> ] (1 - 848)<br><b>Hoxd4_predicted</b> , GXL_628106, GeneID: 288153, Rattus norvegicus chr. 3<br>homeo box D4 (predicted)                                          | <a href="#">neur-nr2f</a> | <a href="#">295 - 167</a> | (-) |
| <b>GXP_1413587</b> [ <a href="#">GXP_1413587</a> ] (1 - 620)<br><b>Ehf_predicted</b> , GXL_628201, GeneID: 295965, Rattus norvegicus chr. 3<br>ets homologous factor (predicted)                                   | <a href="#">neur-nr2f</a> | <a href="#">251 - 382</a> | (+) |
| <b>GXP_1413703</b> [ <a href="#">GXP_1413703</a> ] (1 - 601)<br><b>Pak6_predicted</b> , GXL_628262, GeneID: 296078, Rattus norvegicus chr. 3<br>p21 (CDKN1A)-activated kinase 6 (predicted)                        | <a href="#">neur-nr2f</a> | <a href="#">372 - 517</a> | (+) |
| <b>GXP_1413742</b> [ <a href="#">GXP_1413742</a> ] (1 - 601)<br><b>Pla2g4b_predicted</b> , GXL_628283, GeneID: 311341, Rattus norvegicus chr. 3<br>phospholipase A2, group IVB (cytosolic) (predicted)             | <a href="#">neur-nr2f</a> | <a href="#">122 - 5</a>   | (-) |
| <b>GXP_1164054</b> [ <a href="#">GXP_1164054</a> ] (1 - 601)<br><b>Snap23</b> , GXL_628290, GeneID: 64630, Rattus norvegicus chr. 3<br>synaptosomal-associated protein 23                                          | <a href="#">neur-nr2f</a> | <a href="#">347 - 211</a> | (-) |
| <b>GXP_1164072</b> [ <a href="#">GXP_1164072</a> ] (1 - 761)<br><b>Epb4.2_predicted</b> , GXL_628296, GeneID: 362202, Rattus norvegicus chr. 3<br>erythrocyte protein band 4.2 (predicted)                         | <a href="#">neur-nr2f</a> | <a href="#">75 - 210</a>  | (+) |
| <b>GXP_1414158</b> [ <a href="#">GXP_1414158</a> ] (1 - 603)<br><b>Myh7b_predicted</b> , GXL_628500, GeneID: 311570, Rattus norvegicus chr. 3<br>myosin, heavy polypeptide 7B, cardiac muscle, beta (predicted)    | <a href="#">neur-nr2f</a> | <a href="#">534 - 382</a> | (-) |
| <b>GXP_1164850</b> [ <a href="#">GXP_1164850</a> ] (1 - 678)<br><b>Zfp217_predicted</b> , GXL_628580, GeneID: 311764, Rattus norvegicus chr. 3<br>zinc finger protein 217 (predicted)                              | <a href="#">neur-nr2f</a> | <a href="#">378 - 500</a> | (+) |
| <b>GXP_1164933</b> [ <a href="#">GXP_1164933</a> ] (1 - 976)<br><b>Dat1_predicted</b> , GXL_628613, GeneID: 362286, Rattus norvegicus chr. 3<br>death associated transcription factor 1 (predicted)                | <a href="#">neur-nr2f</a> | <a href="#">87 - 207</a>  | (+) |
|                                                                                                                                                                                                                    | <a href="#">neur-nr2f</a> | <a href="#">880 - 755</a> | (-) |
|                                                                                                                                                                                                                    | <a href="#">neur-nr2f</a> | <a href="#">56 - 193</a>  | (+) |

|                                                                                                                                                                                                                              |                           |                           |     |
|------------------------------------------------------------------------------------------------------------------------------------------------------------------------------------------------------------------------------|---------------------------|---------------------------|-----|
| <b>GXP_1414372</b> [ <a href="#">GXP_1414372</a> ] (1 - 608)<br><b>Datf1 predicted</b> , GXL_628613, GeneID: 362286, Rattus norvegicus chr. 3<br>death associated transcription factor 1 (predicted)                         |                           |                           |     |
| <b>GXP_1414612</b> [ <a href="#">GXP_1414612</a> ] (1 - 602)<br><b>Mdfic predicted</b> , GXL_628751, GeneID: 362325, Rattus norvegicus chr. 4<br>MyoD family inhibitor domain containing (predicted)                         | <a href="#">neur-nr2f</a> | <a href="#">83 - 234</a>  | (+) |
| <b>GXP_1165594</b> [ <a href="#">GXP_1165594</a> ] (1 - 601)<br><b>Igf2bp3</b> , GXL_628866, GeneID: 312320, Rattus norvegicus chr. 4<br>insulin-like growth factor 2, binding protein 3                                     | <a href="#">neur-nr2f</a> | <a href="#">275 - 142</a> | (-) |
| <b>GXP_1414862</b> [ <a href="#">GXP_1414862</a> ] (1 - 737)<br><b>Mpp6 predicted</b> , GXL_628871, GeneID: 362359, Rattus norvegicus chr. 4<br>membrane protein, palmitoylated 6 (MAGUK p55 subfamily member 6) (predicted) | <a href="#">neur-nr2f</a> | <a href="#">54 - 169</a>  | (+) |
| <b>GXP_1165911</b> [ <a href="#">GXP_1165911</a> ] (1 - 672)<br><b>Smyd5 predicted</b> , GXL_629012, GeneID: 312503, Rattus norvegicus chr. 4<br>SET and MYND domain containing 5 (predicted)                                | <a href="#">neur-nr2f</a> | <a href="#">141 - 25</a>  | (-) |
| <b>GXP_1415041</b> [ <a href="#">GXP_1415041</a> ] (1 - 602)<br><b>Alms1 predicted</b> , GXL_629014, GeneID: 297408, Rattus norvegicus chr. 4<br>Alstrom syndrome 1 (predicted)                                              | <a href="#">neur-nr2f</a> | <a href="#">72 - 219</a>  | (+) |
| <b>GXP_1165919</b> [ <a href="#">GXP_1165919</a> ] (1 - 601)<br><b>Cml5</b> , GXL_629018, GeneID: 114020, Rattus norvegicus chr. 4<br>camello-like 5                                                                         | <a href="#">neur-nr2f</a> | <a href="#">176 - 298</a> | (+) |
| <b>GXP_1165980</b> [ <a href="#">GXP_1165980</a> ] (1 - 703)<br><b>Mcm2 predicted</b> , GXL_629040, GeneID: 312538, Rattus norvegicus chr. 4<br>minichromosome maintenance deficient 2 mitotin (S. cerevisiae) (predicted)   | <a href="#">neur-nr2f</a> | <a href="#">8 - 132</a>   | (+) |
| <b>GXP_1415083</b> [ <a href="#">GXP_1415083</a> ] (1 - 601)<br><b>Mcm2 predicted</b> , GXL_629040, GeneID: 312538, Rattus norvegicus chr. 4<br>minichromosome maintenance deficient 2 mitotin (S. cerevisiae) (predicted)   | <a href="#">neur-nr2f</a> | <a href="#">150 - 285</a> | (+) |
| <b>GXP_1415201</b> [ <a href="#">GXP_1415201</a> ] (1 - 603)<br><b>Il17rc predicted</b> , GXL_629100, GeneID: 297520, Rattus norvegicus chr. 4<br>interleukin 17 receptor C (predicted)                                      | <a href="#">neur-nr2f</a> | <a href="#">164 - 317</a> | (+) |
| <b>GXP_1415248</b> [ <a href="#">GXP_1415248</a> ] (1 - 683)<br><b>Plxnd1 predicted</b> , GXL_629115, GeneID: 312652, Rattus norvegicus chr. 4<br>plexin D1 (predicted)                                                      | <a href="#">neur-nr2f</a> | <a href="#">326 - 475</a> | (+) |
| <b>GXP_1166224</b> [ <a href="#">GXP_1166224</a> ] (1 - 601)<br><b>Rasgef1a predicted</b> , GXL_629127, GeneID: 312664, Rattus norvegicus chr. 4<br>RasGEF domain family, member 1A (predicted)                              | <a href="#">neur-nr2f</a> | <a href="#">422 - 539</a> | (+) |
| <b>GXP_1166692</b> [ <a href="#">GXP_1166692</a> ] (1 - 601)<br><b>Rrs1 predicted</b> , GXL_629330, GeneID: 297784, Rattus norvegicus chr. 5<br>RRS1 ribosome biogenesis regulator homolog (S. cerevisiae) (predicted)       | <a href="#">neur-nr2f</a> | <a href="#">383 - 244</a> | (-) |
|                                                                                                                                                                                                                              | <a href="#">neur-nr2f</a> | <a href="#">391 - 539</a> | (+) |
|                                                                                                                                                                                                                              | <a href="#">neur-nr2f</a> | <a href="#">437 - 321</a> | (-) |

|                                                                                                                                                                                                                                                    |                           |                           |     |
|----------------------------------------------------------------------------------------------------------------------------------------------------------------------------------------------------------------------------------------------------|---------------------------|---------------------------|-----|
| <b>GXP_1167096</b> [ <a href="#">GXP_1167096</a> ] (1 - 666)<br><b>Galnt12 predicted</b> , GXL_629493, GeneID: 313233, Rattus norvegicus chr. 5<br>UDP-N-acetyl-alpha-D-galactosamine:polypeptide N-acetylgalactosaminyltransferase 12 (predicted) |                           |                           |     |
| <b>GXP_1415900</b> [ <a href="#">GXP_1415900</a> ] (1 - 602)<br><b>Rnf20 predicted</b> , GXL_629499, GeneID: 313216, Rattus norvegicus chr. 5<br>ring finger protein 20 (predicted)                                                                | <a href="#">neur-nr2f</a> | <a href="#">235 - 387</a> | (+) |
| <b>GXP_1167187</b> [ <a href="#">GXP_1167187</a> ] (1 - 629)<br><b>Susd1 predicted</b> , GXL_629528, GeneID: 298031, Rattus norvegicus chr. 5<br>sushi domain containing 1 (predicted)                                                             | <a href="#">neur-nr2f</a> | <a href="#">235 - 85</a>  | (-) |
| <b>GXP_1416076</b> [ <a href="#">GXP_1416076</a> ] (1 - 602)<br><b>Mtbp predicted</b> , GXL_629607, GeneID: 298227, Rattus norvegicus chr. 5<br>methylthioadenosine phosphorylase (predicted)                                                      | <a href="#">neur-nr2f</a> | <a href="#">217 - 84</a>  | (-) |
| <b>GXP_1416089</b> [ <a href="#">GXP_1416089</a> ] (1 - 659)<br><b>Mysm1 predicted</b> , GXL_629626, GeneID: 298247, Rattus norvegicus chr. 5<br>myb-like, SWIRM and MPN domains 1 (predicted)                                                     | <a href="#">neur-nr2f</a> | <a href="#">326 - 448</a> | (+) |
| <b>GXP_1416231</b> [ <a href="#">GXP_1416231</a> ] (1 - 610)<br><b>Stil predicted</b> , GXL_629710, GeneID: 313506, Rattus norvegicus chr. 5<br>Scl/Tal1 interrupting locus (predicted)                                                            | <a href="#">neur-nr2f</a> | <a href="#">399 - 539</a> | (+) |
| <b>GXP_1416251</b> [ <a href="#">GXP_1416251</a> ] (1 - 605)<br><b>lpp predicted</b> , GXL_629721, GeneID: 298439, Rattus norvegicus chr. 5<br>IAP promoted placental gene (predicted)                                                             | <a href="#">neur-nr2f</a> | <a href="#">518 - 389</a> | (-) |
| <b>GXP_1416436</b> [ <a href="#">GXP_1416436</a> ] (1 - 826)<br><b>Eif2c4 predicted</b> , GXL_629794, GeneID: 298533, Rattus norvegicus chr. 5<br>eukaryotic translation initiation factor 2C, 4 (predicted)                                       | <a href="#">neur-nr2f</a> | <a href="#">520 - 644</a> | (+) |
| <b>GXP_1167909</b> [ <a href="#">GXP_1167909</a> ] (1 - 612)<br><b>Sync predicted</b> , GXL_629815, GeneID: 362606, Rattus norvegicus chr. 5<br>syncollin (predicted)                                                                              | <a href="#">neur-nr2f</a> | <a href="#">193 - 67</a>  | (-) |
| <b>GXP_1167915</b> [ <a href="#">GXP_1167915</a> ] (1 - 734)<br><b>Zbtb8 predicted</b> , GXL_629818, GeneID: 313049, Rattus norvegicus chr. 5<br>zinc finger and BTB domain containing 8 (predicted)                                               | <a href="#">neur-nr2f</a> | <a href="#">596 - 721</a> | (+) |
| <b>GXP_1168036</b> [ <a href="#">GXP_1168036</a> ] (1 - 601)<br><b>Extl1 predicted</b> , GXL_629857, GeneID: 313610, Rattus norvegicus chr. 5<br>exostoses (multiple)-like 1 (predicted)                                                           | <a href="#">neur-nr2f</a> | <a href="#">340 - 215</a> | (-) |
| <b>GXP_1168093</b> [ <a href="#">GXP_1168093</a> ] (1 - 602)<br><b>Epha8</b> , GXL_629875, GeneID: 60589, Rattus norvegicus chr. 5<br>Eph receptor A8                                                                                              | <a href="#">neur-nr2f</a> | <a href="#">323 - 170</a> | (-) |
| <b>GXP_1416620</b> [ <a href="#">GXP_1416620</a> ] (1 - 601)<br><b>Eif4g3 predicted</b> , GXL_629882, GeneID: 298573, Rattus norvegicus chr. 5<br>eukaryotic translation initiation factor 4 gamma, 3 (predicted)                                  | <a href="#">neur-nr2f</a> | <a href="#">159 - 11</a>  | (-) |
|                                                                                                                                                                                                                                                    | <a href="#">neur-nr2f</a> | <a href="#">71 - 222</a>  | (+) |

|                                                                                                                                                                                                                                                                   |                           |                           |     |
|-------------------------------------------------------------------------------------------------------------------------------------------------------------------------------------------------------------------------------------------------------------------|---------------------------|---------------------------|-----|
| <b>GXP_1168184</b> [ <a href="#">GXP_1168184</a> ] (1 - 602)<br><b>Crocc predicted</b> , GXL_629906, GeneID: 313663, Rattus norvegicus chr. 5<br>ciliary rootlet coiled-coil, rootletin (predicted)                                                               |                           |                           |     |
| <b>GXP_1168285</b> [ <a href="#">GXP_1168285</a> ] (1 - 601)<br><b>Mthfr predicted</b> , GXL_629949, GeneID: 362657, Rattus norvegicus chr. 5<br>5, 10-methylenetetrahydrofolate reductase (NADPH) (predicted)                                                    | <a href="#">neur-nr2f</a> | <a href="#">178 - 304</a> | (+) |
| <b>GXP_1416860</b> [ <a href="#">GXP_1416860</a> ] (1 - 797)<br><b>Centb5 predicted</b> , GXL_629998, GeneID: 313772, Rattus norvegicus chr. 5<br>centaurin, beta 5 (predicted)                                                                                   | <a href="#">neur-nr2f</a> | <a href="#">553 - 427</a> | (-) |
| <b>GXP_1417045</b> [ <a href="#">GXP_1417045</a> ] (1 - 603)<br><b>Otof</b> , GXL_630102, GeneID: 84573, Rattus norvegicus chr. 6<br>otoferlin                                                                                                                    | <a href="#">neur-nr2f</a> | <a href="#">480 - 334</a> | (-) |
| <b>GXP_1168790</b> [ <a href="#">GXP_1168790</a> ] (1 - 601)<br><b>Ddef2 predicted</b> , GXL_630143, GeneID: 362719, Rattus norvegicus chr. 6<br>development and differentiation enhancing factor 2 (predicted)                                                   | <a href="#">neur-nr2f</a> | <a href="#">210 - 360</a> | (+) |
| <b>GXP_1417126</b> [ <a href="#">GXP_1417126</a> ] (1 - 602)<br><b>Grhl1 predicted</b> , GXL_630145, GeneID: 313993, Rattus norvegicus chr. 6<br>grainyhead-like 1 (Drosophila) (predicted)                                                                       | <a href="#">neur-nr2f</a> | <a href="#">239 - 375</a> | (+) |
| <b>GXP_1168974</b> [ <a href="#">GXP_1168974</a> ] (1 - 601)<br><b>Nkx2-9 predicted</b> , GXL_630219, GeneID: 299061, Rattus norvegicus chr. 6<br>NK2 transcription factor related, locus 9 (Drosophila) (predicted)                                              | <a href="#">neur-nr2f</a> | <a href="#">576 - 448</a> | (-) |
| <b>GXP_1168989</b> [ <a href="#">GXP_1168989</a> ] (1 - 620)<br><b>Mgea6 predicted</b> , GXL_630228, GeneID: 299078, Rattus norvegicus chr. 6<br>meningioma expressed antigen 6 (coiled-coil proline-rich) (predicted)                                            | <a href="#">neur-nr2f</a> | <a href="#">467 - 594</a> | (+) |
| <b>GXP_1417417</b> [ <a href="#">GXP_1417417</a> ] (1 - 601)<br><b>Zfyve26 predicted</b> , GXL_630308, GeneID: 314265, Rattus norvegicus chr. 6<br>zinc finger, FYVE domain containing 26 (predicted)                                                             | <a href="#">neur-nr2f</a> | <a href="#">451 - 586</a> | (+) |
| <b>GXP_1417554</b> [ <a href="#">GXP_1417554</a> ] (1 - 631)<br><b>Ches1 predicted</b> , GXL_630422, GeneID: 314374, Rattus norvegicus chr. 6<br>checkpoint suppressor 1 (predicted)                                                                              | <a href="#">neur-nr2f</a> | <a href="#">402 - 541</a> | (+) |
| <b>GXP_1417612</b> [ <a href="#">GXP_1417612</a> ] (1 - 601)<br><b>Serpina9 predicted</b> , GXL_630453, GeneID: 299274, Rattus norvegicus chr. 6<br>serine (or cysteine) peptidase inhibitor, clade A (alpha-1 antiproteinase, antitrypsin), member 9 (predicted) | <a href="#">neur-nr2f</a> | <a href="#">376 - 523</a> | (+) |
| <b>GXP_1169512</b> [ <a href="#">GXP_1169512</a> ] (1 - 633)<br><b>Dicer1</b> , GXL_630463, GeneID: 299284, Rattus norvegicus chr. 6<br>Dicer1, Dcr-1 homolog (Drosophila)                                                                                        | <a href="#">neur-nr2f</a> | <a href="#">169 - 33</a>  | (-) |
| <b>GXP_1169523</b> [ <a href="#">GXP_1169523</a> ] (1 - 663)<br><b>Tcl1</b> , GXL_630467, GeneID: 690575, Rattus norvegicus chr. 6<br>T-cell leukemia/lymphoma protein 1A (P14 TCL1 protein) (TCL1 oncogene) (TCL-1 protein)                                      | <a href="#">neur-nr2f</a> | <a href="#">581 - 438</a> | (-) |
|                                                                                                                                                                                                                                                                   | <a href="#">neur-nr2f</a> | <a href="#">488 - 367</a> | (-) |

|                                                                                                                                                                                                                 |                           |                           |     |
|-----------------------------------------------------------------------------------------------------------------------------------------------------------------------------------------------------------------|---------------------------|---------------------------|-----|
| <b>GXP_1169590</b> [ <a href="#">GXP_1169590</a> ] (1 - 695)<br><b>Amn predicted</b> , GXL_630497, GeneID: 314459, Rattus norvegicus chr. 6<br>amnionless (predicted)                                           |                           |                           |     |
| <b>GXP_1417735</b> [ <a href="#">GXP_1417735</a> ] (1 - 602)<br><b>Baz2a predicted</b> , GXL_630553, GeneID: 304601, Rattus norvegicus chr. 7<br>bromodomain adjacent to zinc finger domain, 2A (predicted)     | <a href="#">neur-nr2f</a> | <a href="#">113 - 229</a> | (+) |
| <b>GXP_1417778</b> [ <a href="#">GXP_1417778</a> ] (1 - 601)<br><b>Ankrd24 predicted</b> , GXL_630592, GeneID: 299639, Rattus norvegicus chr. 7<br>ankyrin repeat domain 24 (predicted)                         | <a href="#">neur-nr2f</a> | <a href="#">472 - 324</a> | (-) |
| <b>GXP_1169937</b> [ <a href="#">GXP_1169937</a> ] (1 - 628)<br><b>Cfd</b> , GXL_630635, GeneID: 54249, Rattus norvegicus chr. 7<br>complement factor D (adipsin)                                               | <a href="#">neur-nr2f</a> | <a href="#">219 - 88</a>  | (-) |
| <b>GXP_1417880</b> [ <a href="#">GXP_1417880</a> ] (1 - 601)<br><b>Polrmt predicted</b> , GXL_630636, GeneID: 299604, Rattus norvegicus chr. 7<br>polymerase (RNA) mitochondrial (DNA directed) (predicted)     | <a href="#">neur-nr2f</a> | <a href="#">569 - 420</a> | (-) |
| <b>GXP_1417891</b> [ <a href="#">GXP_1417891</a> ] (1 - 616)<br><b>Brd4</b> , GXL_630649, GeneID: 362844, Rattus norvegicus chr. 7<br>bromodomain containing 4                                                  | <a href="#">neur-nr2f</a> | <a href="#">204 - 347</a> | (+) |
| <b>GXP_1169979</b> [ <a href="#">GXP_1169979</a> ] (1 - 661)<br><b>Wiz predicted</b> , GXL_630650, GeneID: 314598, Rattus norvegicus chr. 7<br>widely-interspaced zinc finger motifs (predicted)                | <a href="#">neur-nr2f</a> | <a href="#">159 - 24</a>  | (-) |
| <b>GXP_1417954</b> [ <a href="#">GXP_1417954</a> ] (1 - 607)<br><b>Aldh1l2 predicted</b> , GXL_630708, GeneID: 299699, Rattus norvegicus chr. 7<br>aldehyde dehydrogenase 1 family, member L2 (predicted)       | <a href="#">neur-nr2f</a> | <a href="#">490 - 355</a> | (-) |
| <b>GXP_1170104</b> [ <a href="#">GXP_1170104</a> ] (1 - 780)<br><b>Gnn</b> , GXL_630714, GeneID: 362863, Rattus norvegicus chr. 7<br>Grp94 neighboring nucleotidase                                             | <a href="#">neur-nr2f</a> | <a href="#">449 - 310</a> | (-) |
| <b>GXP_1170191</b> [ <a href="#">GXP_1170191</a> ] (1 - 601)<br><b>Plxnc1 predicted</b> , GXL_630746, GeneID: 362873, Rattus norvegicus chr. 7<br>plexin C1 (predicted)                                         | <a href="#">neur-nr2f</a> | <a href="#">211 - 337</a> | (+) |
| <b>GXP_1170200</b> [ <a href="#">GXP_1170200</a> ] (1 - 602)<br><b>Eea1 predicted</b> , GXL_630751, GeneID: 314764, Rattus norvegicus chr. 7<br>early endosome antigen 1 (predicted)                            | <a href="#">neur-nr2f</a> | <a href="#">21 - 153</a>  | (+) |
| <b>GXP_1418234</b> [ <a href="#">GXP_1418234</a> ] (1 - 601)<br><b>Stat6 predicted</b> , GXL_630846, GeneID: 362896, Rattus norvegicus chr. 7<br>signal transducer and activator of transcription 6 (predicted) | <a href="#">neur-nr2f</a> | <a href="#">537 - 400</a> | (-) |
| <b>GXP_1170839</b> [ <a href="#">GXP_1170839</a> ] (1 - 645)<br><b>Tmprss6 predicted</b> , GXL_631008, GeneID: 315388, Rattus norvegicus chr. 7<br>transmembrane serine protease 6 (predicted)                  | <a href="#">neur-nr2f</a> | <a href="#">578 - 441</a> | (-) |
|                                                                                                                                                                                                                 | <a href="#">neur-nr2f</a> | <a href="#">7 - 150</a>   | (+) |

|                                                                                                                                                                                                                                            |                           |                           |     |
|--------------------------------------------------------------------------------------------------------------------------------------------------------------------------------------------------------------------------------------------|---------------------------|---------------------------|-----|
| <b>GXP_1418503</b> [ <a href="#">GXP_1418503</a> ] (1 - 602)<br><b>Kdelr3 predicted</b> , GXL_631021, GeneID: 315131, Rattus norvegicus chr. 7<br>KDEL (Lys-Asp-Glu-Leu) endoplasmic reticulum protein retention receptor 3 (predicted)    |                           |                           |     |
| <b>GXP_1170915</b> [ <a href="#">GXP_1170915</a> ] (1 - 602)<br><b>Cacna1i</b> , GXL_631027, GeneID: 56827, Rattus norvegicus chr. 7<br>calcium channel, voltage-dependent, alpha 1I subunit                                               | <a href="#">neur-nr2f</a> | <a href="#">329 - 179</a> | (-) |
| <b>GXP_1418547</b> [ <a href="#">GXP_1418547</a> ] (1 - 601)<br><b>Mei1 predicted</b> , GXL_631047, GeneID: 315162, Rattus norvegicus chr. 7<br>meiosis defective 1 (predicted)                                                            | <a href="#">neur-nr2f</a> | <a href="#">536 - 414</a> | (-) |
| <b>GXP_1418558</b> [ <a href="#">GXP_1418558</a> ] (1 - 601)<br><b>Nfam1 predicted</b> , GXL_631054, GeneID: 362966, Rattus norvegicus chr. 7<br>NFAT activating protein with ITAM motif 1 (predicted)                                     | <a href="#">neur-nr2f</a> | <a href="#">88 - 236</a>  | (+) |
| <b>GXP_1418631</b> [ <a href="#">GXP_1418631</a> ] (1 - 608)<br><b>Plxnb2</b> , GXL_631089, GeneID: 315217, Rattus norvegicus chr. 7<br>plexin B2                                                                                          | <a href="#">neur-nr2f</a> | <a href="#">464 - 338</a> | (-) |
| <b>GXP_1418780</b> [ <a href="#">GXP_1418780</a> ] (1 - 602)<br><b>eplin</b> , GXL_631161, GeneID: 300228, Rattus norvegicus chr. 7<br>epithelial protein lost in neoplasm                                                                 | <a href="#">neur-nr2f</a> | <a href="#">272 - 410</a> | (+) |
| <b>GXP_1171359</b> [ <a href="#">GXP_1171359</a> ] (1 - 609)<br><b>Itgb7</b> , GXL_631185, GeneID: 25713, Rattus norvegicus chr. 7<br>integrin, beta 7                                                                                     | <a href="#">neur-nr2f</a> | <a href="#">322 - 466</a> | (+) |
| <b>GXP_1418911</b> [ <a href="#">GXP_1418911</a> ] (1 - 775)<br><b>Pin1 predicted</b> , GXL_631256, GeneID: 298696, Rattus norvegicus chr. 8<br>protein (peptidyl-prolyl cis/trans isomerase) NIMA-interacting 1 (predicted)               | <a href="#">neur-nr2f</a> | <a href="#">273 - 149</a> | (-) |
| <b>GXP_1418936</b> [ <a href="#">GXP_1418936</a> ] (1 - 602)<br><b>Smarca4</b> , GXL_631266, GeneID: 171379, Rattus norvegicus chr. 8<br>SWI/SNF related, matrix associated, actin dependent regulator of chromatin, subfamily a, member 4 | <a href="#">neur-nr2f</a> | <a href="#">569 - 444</a> | (-) |
| <b>GXP_1418943</b> [ <a href="#">GXP_1418943</a> ] (1 - 602)<br><b>Dock6 predicted</b> , GXL_631268, GeneID: 367039, Rattus norvegicus chr. 8<br>dedicator of cytokinesis 6 (predicted)                                                    | <a href="#">neur-nr2f</a> | <a href="#">422 - 572</a> | (+) |
| <b>GXP_1418944</b> [ <a href="#">GXP_1418944</a> ] (1 - 602)<br><b>Dock6 predicted</b> , GXL_631268, GeneID: 367039, Rattus norvegicus chr. 8<br>dedicator of cytokinesis 6 (predicted)                                                    | <a href="#">neur-nr2f</a> | <a href="#">300 - 453</a> | (+) |
| <b>GXP_1419007</b> [ <a href="#">GXP_1419007</a> ] (1 - 601)<br><b>Kirrel3 predicted</b> , GXL_631308, GeneID: 315546, Rattus norvegicus chr. 8<br>kin of IRRE like 3 (Drosophila) (predicted)                                             | <a href="#">neur-nr2f</a> | <a href="#">116 - 261</a> | (+) |
| <b>GXP_1419071</b> [ <a href="#">GXP_1419071</a> ] (1 - 601)<br><b>Sorl1</b> , GXL_631374, GeneID: 300652, Rattus norvegicus chr. 8<br>sortilin-related receptor, LDLR class A repeats-containing                                          | <a href="#">neur-nr2f</a> | <a href="#">534 - 387</a> | (-) |
|                                                                                                                                                                                                                                            | <a href="#">neur-nr2f</a> | <a href="#">161 - 33</a>  | (-) |

|                                                                                                                                                                                                                                  |                           |                           |     |
|----------------------------------------------------------------------------------------------------------------------------------------------------------------------------------------------------------------------------------|---------------------------|---------------------------|-----|
| <b>GXP_1419124</b> [ <a href="#">GXP_1419124</a> ] (1 - 602)<br><b>Phldb1</b> , GXL_631391, GeneID: 171434, Rattus norvegicus chr. 8<br>pleckstrin homology-like domain, family B, member 1                                      |                           |                           |     |
| <b>GXP_1419125</b> [ <a href="#">GXP_1419125</a> ] (1 - 602)<br><b>Phldb1</b> , GXL_631391, GeneID: 171434, Rattus norvegicus chr. 8<br>pleckstrin homology-like domain, family B, member 1                                      | <a href="#">neur-nr2f</a> | <a href="#">244 - 94</a>  | (-) |
| <b>GXP_1172182</b> [ <a href="#">GXP_1172182</a> ] (1 - 1271)<br><b>Pif1</b> , GXL_631505, GeneID: 367645, Rattus norvegicus chr. 8<br>Pif1/Rrm3 DNA-helicase-like protein                                                       | <a href="#">neur-nr2f</a> | <a href="#">178 - 49</a>  | (-) |
| <b>GXP_1419515</b> [ <a href="#">GXP_1419515</a> ] (1 - 602)<br><b>Myo5c_predicted</b> , GXL_631541, GeneID: 315820, Rattus norvegicus chr. 8<br>myosin VC (predicted)                                                           | <a href="#">neur-nr2f</a> | <a href="#">12 - 150</a>  | (+) |
| <b>GXP_1419636</b> [ <a href="#">GXP_1419636</a> ] (1 - 602)<br><b>Xrn1_predicted</b> , GXL_631601, GeneID: 300944, Rattus norvegicus chr. 8<br>5'-3' exoribonuclease 1 (predicted)                                              | <a href="#">neur-nr2f</a> | <a href="#">151 - 267</a> | (+) |
| <b>GXP_1172538</b> [ <a href="#">GXP_1172538</a> ] (1 - 786)<br><b>Mrpl3_predicted</b> , GXL_631642, GeneID: 300974, Rattus norvegicus chr. 8<br>mitochondrial ribosomal protein L3 (predicted)                                  | <a href="#">neur-nr2f</a> | <a href="#">442 - 585</a> | (+) |
| <b>GXP_1419941</b> [ <a href="#">GXP_1419941</a> ] (1 - 680)<br><b>Slc22a14_predicted</b> , GXL_631721, GeneID: 316061, Rattus norvegicus chr. 8<br>solute carrier family 22 (organic cation transporter), member 14 (predicted) | <a href="#">neur-nr2f</a> | <a href="#">585 - 470</a> | (-) |
| <b>GXP_1420010</b> [ <a href="#">GXP_1420010</a> ] (1 - 601)<br><b>Fyco1_predicted</b> , GXL_631745, GeneID: 301085, Rattus norvegicus chr. 8<br>FYVE and coiled-coil domain containing 1 (predicted)                            | <a href="#">neur-nr2f</a> | <a href="#">311 - 432</a> | (+) |
| <b>GXP_1420086</b> [ <a href="#">GXP_1420086</a> ] (1 - 605)<br><b>Xpo5_predicted</b> , GXL_631815, GeneID: 363194, Rattus norvegicus chr. 9<br>exportin 5 (predicted)                                                           | <a href="#">neur-nr2f</a> | <a href="#">512 - 367</a> | (-) |
| <b>GXP_1173254</b> [ <a href="#">GXP_1173254</a> ] (1 - 704)<br><b>Ankrd39_predicted</b> , GXL_631894, GeneID: 367251, Rattus norvegicus chr. 9<br>ankyrin repeat domain 39 (predicted)                                          | <a href="#">neur-nr2f</a> | <a href="#">81 - 234</a>  | (+) |
| <b>GXP_1420260</b> [ <a href="#">GXP_1420260</a> ] (1 - 601)<br><b>Eif5b</b> , GXL_631905, GeneID: 308306, Rattus norvegicus chr. 9<br>eukaryotic translation initiation factor 5B                                               | <a href="#">neur-nr2f</a> | <a href="#">451 - 579</a> | (+) |
| <b>GXP_1420261</b> [ <a href="#">GXP_1420261</a> ] (1 - 602)<br><b>Eif5b</b> , GXL_631905, GeneID: 308306, Rattus norvegicus chr. 9<br>eukaryotic translation initiation factor 5B                                               | <a href="#">neur-nr2f</a> | <a href="#">121 - 249</a> | (+) |
| <b>GXP_1420388</b> [ <a href="#">GXP_1420388</a> ] (1 - 601)<br><b>Als2</b> , GXL_631978, GeneID: 363235, Rattus norvegicus chr. 9<br>amyotrophic lateral sclerosis 2 (juvenile) homolog (human)                                 | <a href="#">neur-nr2f</a> | <a href="#">312 - 198</a> | (-) |
|                                                                                                                                                                                                                                  | <a href="#">neur-nr2f</a> | <a href="#">460 - 323</a> | (-) |

|                                                                                                                                                                                                                                            |                           |                           |     |
|--------------------------------------------------------------------------------------------------------------------------------------------------------------------------------------------------------------------------------------------|---------------------------|---------------------------|-----|
| <b>GXP_1420436</b> [ <a href="#">GXP_1420436</a> ] (1 - 644)<br><b>Klf7 predicted</b> , GXL_631995, GeneID: 363243, Rattus norvegicus chr. 9<br>Kruppel-like factor 7 (ubiquitous) (predicted)                                             |                           |                           |     |
| <b>GXP_1173580</b> [ <a href="#">GXP_1173580</a> ] (1 - 601)<br><b>Rpe predicted</b> , GXL_632004, GeneID: 316460, Rattus norvegicus chr. 9<br>ribulose-5-phosphate-3-epimerase (predicted)                                                | <a href="#">neur-nr2f</a> | <a href="#">160 - 284</a> | (+) |
| <b>GXP_1173652</b> [ <a href="#">GXP_1173652</a> ] (1 - 754)<br><b>Vil1 predicted</b> , GXL_632025, GeneID: 316521, Rattus norvegicus chr. 9<br>villin 1 (predicted)                                                                       | <a href="#">neur-nr2f</a> | <a href="#">708 - 593</a> | (-) |
| <b>GXP_1420657</b> [ <a href="#">GXP_1420657</a> ] (1 - 602)<br><b>Centg2 predicted</b> , GXL_632083, GeneID: 316611, Rattus norvegicus chr. 9<br>centaurin, gamma 2 (predicted)                                                           | <a href="#">neur-nr2f</a> | <a href="#">533 - 383</a> | (-) |
| <b>GXP_1420720</b> [ <a href="#">GXP_1420720</a> ] (1 - 618)<br><b>Neu4 predicted</b> , GXL_632110, GeneID: 316642, Rattus norvegicus chr. 9<br>sialidase 4 (predicted)                                                                    | <a href="#">neur-nr2f</a> | <a href="#">199 - 66</a>  | (-) |
| <b>GXP_1420848</b> [ <a href="#">GXP_1420848</a> ] (1 - 602)<br><b>Klhl13</b> , GXL_632210, GeneID: 313445, Rattus norvegicus chr. X<br>kelch-like 13 (Drosophila)                                                                         | <a href="#">neur-nr2f</a> | <a href="#">168 - 317</a> | (+) |
| <b>GXP_1420891</b> [ <a href="#">GXP_1420891</a> ] (1 - 601)<br><b>Bcor predicted</b> , GXL_632250, GeneID: 317346, Rattus norvegicus chr. X<br>Bcl6 interacting corepressor (predicted)                                                   | <a href="#">neur-nr2f</a> | <a href="#">94 - 212</a>  | (+) |
| <b>GXP_1174351</b> [ <a href="#">GXP_1174351</a> ] (1 - 601)<br><b>Irs4 predicted</b> , GXL_632314, GeneID: 315350, Rattus norvegicus chr. X<br>insulin receptor substrate 4 (predicted)                                                   | <a href="#">neur-nr2f</a> | <a href="#">51 - 189</a>  | (+) |
| <b>GXP_1421136</b> [ <a href="#">GXP_1421136</a> ] (1 - 607)<br><b>Stard8 predicted</b> , GXL_632488, GeneID: 312113, Rattus norvegicus chr. X<br>START domain containing 8 (predicted)                                                    | <a href="#">neur-nr2f</a> | <a href="#">391 - 540</a> | (+) |
| <b>GXP_1421206</b> [ <a href="#">GXP_1421206</a> ] (1 - 601)<br><b>Tbx</b> , GXL_632554, GeneID: 302369, Rattus norvegicus chr. X<br>T-box 22                                                                                              | <a href="#">neur-nr2f</a> | <a href="#">235 - 91</a>  | (-) |
| <b>GXP_1421236</b> [ <a href="#">GXP_1421236</a> ] (1 - 601)<br><b>Taf7l predicted</b> , GXL_632615, GeneID: 363493, Rattus norvegicus chr. X<br>TAF7-like RNA polymerase II, TATA box binding protein (TBP)-associated factor (predicted) | <a href="#">neur-nr2f</a> | <a href="#">571 - 429</a> | (-) |
| <b>GXP_1408308</b> [ <a href="#">GXP_1408308</a> ] (1 - 601)<br><b>Mmp2</b> , GXL_688272, GeneID: 81686, Rattus norvegicus chr. 19<br>matrix metalloproteinase 2                                                                           | <a href="#">neur-nr2f</a> | <a href="#">219 - 345</a> | (+) |
| <b>GXP_1408686</b> [ <a href="#">GXP_1408686</a> ] (1 - 605)<br><b>Gcsh</b> , GXL_688281, GeneID: 171133, Rattus norvegicus chr. 19<br>glycine cleavage system protein H (aminomethyl carrier)                                             | <a href="#">neur-nr2f</a> | <a href="#">299 - 437</a> | (+) |
|                                                                                                                                                                                                                                            | <a href="#">neur-nr2f</a> | <a href="#">205 - 68</a>  | (-) |



|                                                                                                                                                                                        |                           |                           |     |
|----------------------------------------------------------------------------------------------------------------------------------------------------------------------------------------|---------------------------|---------------------------|-----|
| <b>GXP_1410154</b> [ <a href="#">GXP_1410154</a> ] (1 - 601)<br><b>Eef2k</b> , GXL_688301, GeneID: 25435, Rattus norvegicus chr. 1<br>eukaryotic elongation factor-2 kinase            |                           |                           |     |
| <b>GXP_1411269</b> [ <a href="#">GXP_1411269</a> ] (1 - 601)<br><b>Tead3</b> , GXL_688309, GeneID: 294299, Rattus norvegicus chr. 20<br>TEA domain family member 3                     | <a href="#">neur-nr2f</a> | <a href="#">538 - 407</a> | (-) |
| <b>GXP_1414418</b> [ <a href="#">GXP_1414418</a> ] (1 - 602)<br><b>Opr1</b> , GXL_688342, GeneID: 29256, Rattus norvegicus chr. 3<br>opioid receptor-like 1                            | <a href="#">neur-nr2f</a> | <a href="#">288 - 415</a> | (+) |
| <b>GXP_1415654</b> [ <a href="#">GXP_1415654</a> ] (1 - 601)<br><b>Asph_predicted</b> , GXL_688353, GeneID: 312981, Rattus norvegicus chr. 5<br>aspartate-beta-hydroxylase (predicted) | <a href="#">neur-nr2f</a> | <a href="#">281 - 163</a> | (-) |
| <b>GXP_1418148</b> [ <a href="#">GXP_1418148</a> ] (1 - 695)<br><b>Rap1b</b> , GXL_688374, GeneID: 171337, Rattus norvegicus chr. 7<br>RAS related protein 1b                          | <a href="#">neur-nr2f</a> | <a href="#">264 - 117</a> | (-) |
| <b>GXP_1418461</b> [ <a href="#">GXP_1418461</a> ] (1 - 816)<br><b>Pvalb</b> , GXL_688376, GeneID: 25269, Rattus norvegicus chr. 7<br>parvalbumin                                      | <a href="#">neur-nr2f</a> | <a href="#">378 - 242</a> | (-) |
| <b>GXP_1419860</b> [ <a href="#">GXP_1419860</a> ] (1 - 601)<br><b>Pthr1</b> , GXL_688389, GeneID: 56813, Rattus norvegicus chr. 8<br>parathyroid hormone receptor 1                   | <a href="#">neur-nr2f</a> | <a href="#">363 - 214</a> | (-) |
| <b>GXP_1419995</b> [ <a href="#">GXP_1419995</a> ] (1 - 604)<br><b>Tgm4</b> , GXL_688391, GeneID: 64679, Rattus norvegicus chr. 8<br>transglutaminase 4 (prostate)                     | <a href="#">neur-nr2f</a> | <a href="#">68 - 201</a>  | (+) |

A total of 788 matches (731 non-redundant matches) was found in 726 sequences.

Sequences searched: 28203 (18846677 bp).

## Evaluation of results

Model: neur-nr2f

Number of input genes: 696

GO category "biological\_process"

Number of genes annotated in GO: 443

Number of significant GO groups found: 30

| GO group | p-value | list of genes | GeneIDs |
|----------|---------|---------------|---------|
|----------|---------|---------------|---------|

|                                              |             | # genes<br>(observed) | # genes<br>(expected) |                                                                                                                                                                                                                              |                                                                                                                                                                                                                         |
|----------------------------------------------|-------------|-----------------------|-----------------------|------------------------------------------------------------------------------------------------------------------------------------------------------------------------------------------------------------------------------|-------------------------------------------------------------------------------------------------------------------------------------------------------------------------------------------------------------------------|
| regulation of developmental process          | 0.000421303 | 24                    | 11.37                 | Cntn4, Fzd1, Notch2, Klf10, Hes5, Dynll1, Inhba, Timp2, Ntn1, Arhgef18_predicted, Wnt7b, Tgfb2, Twsg1_predicted, Ntf3, Efna1, Ereg, Chrd, Acin1, Prlr, Pvr1, Nell1, Myst3, Dicer1, Plxnb2                                    | 116658, 58868, 29492, 81813, 79225, 58945, 29200, 29543, 114523, 304193, 315196, 81809, 363294, 81737, 94268, 59325, 117275, 305884, 24684, 192183, 81733, 306571, 299284, 315217                                       |
| regulation of cell differentiation           | 0.000508592 | 18                    | 7.53                  | Cntn4, Fzd1, Notch2, Klf10, Hes5, Inhba, Timp2, Wnt7b, Tgfb2, Twsg1_predicted, Ntf3, Ereg, Chrd, Acin1, Prlr, Nell1, Myst3, Dicer1                                                                                           | 116658, 58868, 29492, 81813, 79225, 29200, 29543, 315196, 81809, 363294, 81737, 59325, 117275, 305884, 24684, 81733, 306571, 299284                                                                                     |
| osteoblast differentiation                   | 0.000536761 | 7                     | 1.49                  | Fzd1, Wnt7b, Twsg1_predicted, Chrd, Gabbr1, Nell1, Pthr1                                                                                                                                                                     | 58868, 315196, 363294, 117275, 81657, 81733, 56813                                                                                                                                                                      |
| negative regulation of cell differentiation  | 0.000663321 | 10                    | 2.97                  | Cntn4, Notch2, Hes5, Inhba, Tgfb2, Twsg1_predicted, Ereg, Chrd, Myst3, Dicer1                                                                                                                                                | 116658, 29492, 79225, 29200, 81809, 363294, 59325, 117275, 306571, 299284                                                                                                                                               |
| dopamine metabolic process                   | 0.00094984  | 5                     | 0.82                  | Cyp2d22, Tgfb2, Nr4a2, Sncaip_predicted, Th                                                                                                                                                                                  | 171522, 81809, 54278, 307309, 25085                                                                                                                                                                                     |
| regulation of neurotransmitter levels        | 0.00106735  | 14                    | 5.47                  | Rab3a, Stx1a, Lin7a, Cyp2d22, Tgfb2, Lin7c, Trh, Syt3, Nr4a2, Syt1, Sncaip_predicted, Ppfia3, Tph1, Th                                                                                                                       | 25531, 116470, 85327, 171522, 81809, 60442, 25569, 25731, 54278, 25716, 307309, 140591, 24848, 25085                                                                                                                    |
| regulation of osteoblast differentiation     | 0.0012637   | 5                     | 0.86                  | Fzd1, Wnt7b, Twsg1_predicted, Chrd, Nell1                                                                                                                                                                                    | 58868, 315196, 363294, 117275, 81733                                                                                                                                                                                    |
| synaptic transmission                        | 0.00147683  | 30                    | 16.84                 | Cntn4, Lynx1_predicted, Htr1d, Syp, Rab3a, Kcnmb1, Gabrg2, Stx1a, Dlgh4, Lin7a, Cyp2d22, Htr3b, Fnta, Tgfb2, Lin7c, Acp2, Grm8, Ntf3, Trh, Clstn3, Syt3, Ntf5, Dlgap1, Sv2c, Nr4a2, Syt1, Sncaip_predicted, Ppfia3, Tph1, Th | 116658, 300018, 25323, 24804, 25531, 29747, 29709, 116470, 29495, 85327, 171522, 58963, 25318, 81809, 60442, 24162, 60590, 81737, 25569, 171393, 25731, 25730, 65040, 29643, 54278, 25716, 307309, 140591, 24848, 25085 |
| tissue remodeling                            | 0.0014962   | 14                    | 5.66                  | Fzd1, Klf10, Wnt7b, Csrp3, Tgfb2, Ptpv, Vegfa, Twsg1_predicted, Tcirg1, Chrd, Gabbr1, Nell1, Mmp2, Pthr1                                                                                                                     | 58868, 81813, 315196, 117505, 81809, 64576, 83785, 363294, 293650, 117275, 81657, 81733, 81686, 56813                                                                                                                   |
| negative regulation of developmental process | 0.00193896  | 11                    | 3.98                  | Cntn4, Notch2, Hes5, Inhba, Ntn1, Tgfb2, Twsg1_predicted, Ereg, Chrd, Myst3, Dicer1                                                                                                                                          | 116658, 29492, 79225, 29200, 114523, 81809, 363294, 59325, 117275, 306571, 299284                                                                                                                                       |
| stem cell development                        | 0.00196501  | 3                     | 0.29                  | Notch2, Myst3, Dicer1                                                                                                                                                                                                        | 29492, 306571, 299284                                                                                                                                                                                                   |
| stem cell maintenance                        | 0.00196501  | 3                     | 0.29                  | Notch2, Myst3, Dicer1                                                                                                                                                                                                        | 29492, 306571, 299284                                                                                                                                                                                                   |
| cell organization and biogenesis             | 0.00200744  | 96                    | 72.91                 | Hsd3b7, Rock2, M6pr, Cntn4, Zfp384, Eif2ak3, Notch2, Arhgef2, Frap1, Dynll1, Hrasls_predicted, Tnk2, Ap2m1, Mid1, Syp, Phb, Rab3a, H2afy,                                                                                    | 246211, 25537, 312689, 116658, 171018, 29702, 29492, 310635, 56718, 58945, 288025, 303882,                                                                                                                              |

|                                    |            |    |       |                                                                                                                                                                                                                                                                                                                                                                                                                                                                                                                                                                                                                                                                                                                                                                                                                         |                                                                                                                                                                                                                                                                                                                                                                                                                                                                                                                                                                                                                                                                   |
|------------------------------------|------------|----|-------|-------------------------------------------------------------------------------------------------------------------------------------------------------------------------------------------------------------------------------------------------------------------------------------------------------------------------------------------------------------------------------------------------------------------------------------------------------------------------------------------------------------------------------------------------------------------------------------------------------------------------------------------------------------------------------------------------------------------------------------------------------------------------------------------------------------------------|-------------------------------------------------------------------------------------------------------------------------------------------------------------------------------------------------------------------------------------------------------------------------------------------------------------------------------------------------------------------------------------------------------------------------------------------------------------------------------------------------------------------------------------------------------------------------------------------------------------------------------------------------------------------|
|                                    |            |    |       | Ntrk2, Prm2, Ntn1, Rasd1, Pxn, Arhgef18_predicted, Ramp2, Dlgh4, Wnt7b, Abcd3, Pola2, Emp3, Ap3b2_predicted, Notch4, Tgfb2, Csrp1, Abtb2, Acp2, Tep1, Vegfa, Tuba4a, Smarcc1_predicted, Ntf3, Nlcl1, Abi2, Pfn2, Lmna, Efn1, Pelo, Mkks, Sycp2, Vps54, Sf3a1_predicted, Kdelr1, Arntl, Eif3s8, Taf6l_predicted, Sqstm1, Pcnt1, Spnb2, Acin1, Katnb1, Pacsin3, Eif2ak4_predicted, Pacsin2, Hdac7a, Pvr1, Nfasc, Alox12_predicted, Ap1m1, Sgcz_predicted, Myst3, Arhgap26_predicted, Spire1_predicted, Ankrd27_predicted, Tubgcp5_predicted, Eed_predicted, Hps3_predicted, Mbnl1, Flg, Ntng2_predicted, Snap23, Mcm2_predicted, Sync_predicted, Eif4g3_predicted, Nkx2-9_predicted, Dicer1, Baz2a_predicted, Eea1_predicted, Kdelr3_predicted, Plxnb2, Smarca4, Sorl1, Xpo5_predicted, Eif5b, Als2, Vil1_predicted, Mmp2 | 116563, 54252, 24804, 25344, 25531, 29384, 25054, 25345, 114523, 64455, 360820, 304193, 58966, 29495, 315196, 25270, 85242, 81505, 308777, 406162, 81809, 29276, 171440, 24162, 64523, 83785, 316531, 301020, 81737, 64896, 286928, 81531, 60374, 94268, 294754, 311456, 83820, 286932, 305479, 361577, 29657, 293484, 309194, 113894, 287830, 305614, 305884, 291852, 311187, 114859, 124461, 84582, 192183, 116690, 287454, 306332, 364605, 306571, 307459, 307348, 361555, 308663, 293104, 310288, 282635, 24641, 311836, 64630, 312538, 362606, 298573, 299061, 299284, 304601, 314764, 315131, 315217, 171379, 300652, 363194, 308306, 363235, 316521, 81686 |
| glial cell fate commitment         | 0.00229565 | 2  | 0.10  | Ntf3, Smarca4                                                                                                                                                                                                                                                                                                                                                                                                                                                                                                                                                                                                                                                                                                                                                                                                           | 81737, 171379                                                                                                                                                                                                                                                                                                                                                                                                                                                                                                                                                                                                                                                     |
| glial cell fate determination      | 0.00229565 | 2  | 0.10  | Ntf3, Smarca4                                                                                                                                                                                                                                                                                                                                                                                                                                                                                                                                                                                                                                                                                                                                                                                                           | 81737, 171379                                                                                                                                                                                                                                                                                                                                                                                                                                                                                                                                                                                                                                                     |
| transmission of nerve impulse      | 0.00246398 | 32 | 18.95 | Cntn4, Lynx1_predicted, Htr1d, Syp, Rab3a, Kcnmb1, Gabrg2, Stx1a, Dlgh4, Lin7a, Cyp2d22, Tpo1, Htr3b, Fnta, Tgfb2, Lin7c, Acp2, Grm8, Ntf3, Trh, Clstn3, Syt3, Ntf5, Dlgap1, Mpdz, Sv2c, Nr4a2, Syt1, Sncap_predicted, Ppfia3, Tph1, Th                                                                                                                                                                                                                                                                                                                                                                                                                                                                                                                                                                                 | 116658, 300018, 25323, 24804, 25531, 29747, 29709, 116470, 29495, 85327, 171522, 170907, 58963, 25318, 81809, 60442, 24162, 60590, 81737, 25569, 171393, 25731, 25730, 65040, 29365, 29643, 54278, 25716, 307309, 140591, 24848, 25085                                                                                                                                                                                                                                                                                                                                                                                                                            |
| stem cell differentiation          | 0.00331434 | 3  | 0.34  | Notch2, Myst3, Dicer1                                                                                                                                                                                                                                                                                                                                                                                                                                                                                                                                                                                                                                                                                                                                                                                                   | 29492, 306571, 299284                                                                                                                                                                                                                                                                                                                                                                                                                                                                                                                                                                                                                                             |
| neurotransmitter metabolic process | 0.00431841 | 6  | 1.58  | Cyp2d22, Tgfb2, Nr4a2, Sncap_predicted, Tph1, Th                                                                                                                                                                                                                                                                                                                                                                                                                                                                                                                                                                                                                                                                                                                                                                        | 171522, 81809, 54278, 307309, 24848, 25085                                                                                                                                                                                                                                                                                                                                                                                                                                                                                                                                                                                                                        |
| cell-cell signaling                | 0.00510852 | 44 | 29.64 | Cntn4, Fzd1, Lynx1_predicted, Htr1d, Syp, Wnt5a, Rab3a, Inhba, Kcnmb1, Gabrg2, Ntn1, Stx1a, Ccl11, Dlgh4, Lin7a, Wnt7b, Cyp2d22, Tpo1, Htr3b, Fnta, Tgfb2, Lin7c, Acp2, Grm8, Ntf3, Trh, Clstn3, Syt3, Ntf5, Dlgap1, Mpdz, Sv2c, Ereg, Ins1, Nr4a2, Syt1, Grap2, Trp63, Sncap_predicted, Ppfia3, Tph1, Nmb_predicted, Th, Wnt8b_predicted                                                                                                                                                                                                                                                                                                                                                                                                                                                                               | 116658, 58868, 300018, 25323, 24804, 64566, 25531, 29200, 29747, 29709, 114523, 116470, 29397, 29495, 85327, 315196, 171522, 170907, 58963, 25318, 81809, 60442, 24162, 60590, 81737, 25569, 171393, 25731, 25730, 65040, 29365, 29643, 59325, 24505, 54278, 25716, 366962, 246334, 307309, 140591, 24848, 308751, 25085, 293990                                                                                                                                                                                                                                                                                                                                  |
| synaptic vesicle transport         | 0.00519383 | 7  | 2.16  | Syp, Stx1a, Dlgh4, Lin7a, Syt3, Syt1, Eea1_predicted                                                                                                                                                                                                                                                                                                                                                                                                                                                                                                                                                                                                                                                                                                                                                                    | 24804, 116470, 29495, 85327, 25731, 25716, 314764                                                                                                                                                                                                                                                                                                                                                                                                                                                                                                                                                                                                                 |
| catecholamine metabolic process    | 0.00594228 | 5  | 1.20  | Cyp2d22, Tgfb2, Nr4a2, Sncap_predicted, Th                                                                                                                                                                                                                                                                                                                                                                                                                                                                                                                                                                                                                                                                                                                                                                              | 171522, 81809, 54278, 307309, 25085                                                                                                                                                                                                                                                                                                                                                                                                                                                                                                                                                                                                                               |

|                                                   |            |   |      |                                                                       |                                                                  |
|---------------------------------------------------|------------|---|------|-----------------------------------------------------------------------|------------------------------------------------------------------|
| phenol metabolic process                          | 0.00594228 | 5 | 1.20 | Cyp2d22, Tgfb2, Nr4a2, Sncaip_predicted, Th                           | 171522, 81809, 54278, 307309, 25085                              |
| synaptic vesicle maturation                       | 0.00655803 | 2 | 0.14 | Syp, Dlgh4                                                            | 24804, 29495                                                     |
| positive regulation of neurotransmitter secretion | 0.00655803 | 2 | 0.14 | Stx1a, Trh                                                            | 116470, 25569                                                    |
| regulation of gene expression, epigenetic         | 0.0067307  | 6 | 1.73 | H2afy, Cntn1, Il1rl1, Eed_predicted, Dicer1, Smarca4                  | 29384, 117258, 25556, 293104, 299284, 171379                     |
| cell fate determination                           | 0.00707275 | 5 | 1.25 | Notch2, Notch4, Ntf3, Ntf5, Smarca4                                   | 29492, 406162, 81737, 25730, 171379                              |
| drug metabolic process                            | 0.00741184 | 3 | 0.43 | Cyp2d22, Udpgr2, Cyp2c6                                               | 171522, 286954, 246070                                           |
| neurotransmitter secretion                        | 0.0078628  | 9 | 3.50 | Rab3a, Stx1a, Lin7a, Lin7c, Trh, Syt3, Syt1, Sncaip_predicted, Ppfia3 | 25531, 116470, 85327, 60442, 25569, 25731, 25716, 307309, 140591 |
| tissue morphogenesis                              | 0.00880128 | 6 | 1.82 | Tbx6_predicted, Tgfb2, Twsg1_predicted, Chrd, Trp63, Flg              | 365371, 81809, 363294, 117275, 246334, 24641                     |
| mesoderm formation                                | 0.00934254 | 4 | 0.86 | Tbx6_predicted, Tgfb2, Twsg1_predicted, Chrd                          | 365371, 81809, 363294, 117275                                    |

**GO category "molecular\_function"**

Number of genes annotated in GO: 465  
 Number of significant GO groups found: 9

| GO group        | p-value     | # genes (observed) | # genes (expected) | list of genes                                                                                                                                                                                                                                                                                                                                                                                                                                                                                                                                                                                                                                                                                                                                                                                                             | GeneIDs                                                                                                                                                                                                                                                                                                                                                                                                                                                                                                                                          |
|-----------------|-------------|--------------------|--------------------|---------------------------------------------------------------------------------------------------------------------------------------------------------------------------------------------------------------------------------------------------------------------------------------------------------------------------------------------------------------------------------------------------------------------------------------------------------------------------------------------------------------------------------------------------------------------------------------------------------------------------------------------------------------------------------------------------------------------------------------------------------------------------------------------------------------------------|--------------------------------------------------------------------------------------------------------------------------------------------------------------------------------------------------------------------------------------------------------------------------------------------------------------------------------------------------------------------------------------------------------------------------------------------------------------------------------------------------------------------------------------------------|
| protein binding | 0.000943263 | 210                | 177.48             | Tacc2, Ctsc, Tnfrsf1b, Rock2, Zfp384, Fzd1, Itpr1, S100a11, Lmo4, Kcnd3, Notch2, Arhgef2, Dlgap4, Pscdbp, Acvr1, Lynx1_predicted, Slc2a1, Pla2g2a, Frap1, Casp9, Camkk2, Dynll1, Tnk2, Clcn2, Ap2m1, Apg3l, Mid1, Syp, Phb, Myr8, Wnt5a, Rab3a, Ntrk2, Inhba, Fbp1, Stat3, Timp2, Snip, Gabrg2, Maml1_predicted, Ntn1, Rasd1, Atp1b2, Lnx2_predicted, Pxn, Stx1a, Serpine1, Ramp2, Ccl11, Flot2, Dlgh4, Aoc3, Lin7a, Nfe2, Wnt7b, Grip1, Msn, Abcd3, Pola2, Tagln, Csrp3, Notch4, Ltb, Cdon, Tgfb2, Dpt_predicted, Csrp1, Lhx9, Lin7c, Chgb, Acp2, Ptk2b, Pdlim2, Igfbp5, Vegfa, Twsg1_predicted, Tuba4a, Orc2l, Per2, Hspcb, Adm2, Csf2rb1, Smarcc1_predicted, Oldlr1, Nos3, Ntf3, Trh, Syt3, Nphs1, Ntf5, Nolc1, Il1rl1, Abi2, Bcs1l, Dlgap1, Mpdz, Dbccr1, Pfn2, Lmna, Efna1, Pde4dip, Rab25_predicted, Arfrp1, Rgs19, | 309025, 25423, 156767, 25537, 171018, 58868, 25262, 445415, 362051, 65195, 29492, 310635, 286930, 311047, 79558, 300018, 24778, 29692, 56718, 58918, 83506, 58945, 303882, 29232, 116563, 171415, 54252, 24804, 25344, 192253, 64566, 25531, 25054, 29200, 24362, 25125, 29543, 56029, 29709, 303101, 114523, 64455, 24214, 360761, 360820, 116470, 24617, 58966, 29397, 83764, 29495, 29473, 85327, 366998, 315196, 84016, 81521, 25270, 85242, 25123, 117505, 406162, 361795, 50938, 81809, 289178, 29276, 289048, 60442, 24259, 24162, 50646, |

|                                                   |            |     |        |                                                                                                                                                                                                                                                                                                                                                                                                                                                                                                                                                                                                                                                                                                                                                                                                                                                                                                                                                                                                                                                                                                                                                                                          |                                                                                                                                                                                                                                                                                                                                                                                                                                                                                                                                                                                                                                                                                                                                                                                                                                                                                                                                                                                                                                                                                                         |
|---------------------------------------------------|------------|-----|--------|------------------------------------------------------------------------------------------------------------------------------------------------------------------------------------------------------------------------------------------------------------------------------------------------------------------------------------------------------------------------------------------------------------------------------------------------------------------------------------------------------------------------------------------------------------------------------------------------------------------------------------------------------------------------------------------------------------------------------------------------------------------------------------------------------------------------------------------------------------------------------------------------------------------------------------------------------------------------------------------------------------------------------------------------------------------------------------------------------------------------------------------------------------------------------------------|---------------------------------------------------------------------------------------------------------------------------------------------------------------------------------------------------------------------------------------------------------------------------------------------------------------------------------------------------------------------------------------------------------------------------------------------------------------------------------------------------------------------------------------------------------------------------------------------------------------------------------------------------------------------------------------------------------------------------------------------------------------------------------------------------------------------------------------------------------------------------------------------------------------------------------------------------------------------------------------------------------------------------------------------------------------------------------------------------------|
|                                                   |            |     |        | Angptl2, Mkks, Stau1, Plcb2, Pdgfra, Rpl5, Ereg, Atp5a1, Catna1, Nufip1, Gnrhr, Cd48, Rps6ka2, Map4k1_predicted, Arntl, Ganab_predicted, Ins1, Sqstm1, Map2k3, Thrap4, Slc4a1, Mx1, Chrd, Mospd3, Ncor2_predicted, Fln29, Spnb2, Acin1, Ppp3cc, Wbp4, Katnb1, Prlr, Tiparp_predicted, Gabbr1, Nr4a2, Pacsin3, Rnpc2, Foxp1, Adipor2, Wwp1, Syt1, Grap2, Pacsin2, Hdac7a, Pvr1, Hes6, Irak1_predicted, Nell1, Trp63, Rab3gap2, Hr, Pias4, Sag, Rpa1, Itga3_predicted, Sfrs15, Zfp295_predicted, Rimbp2, Rfc5_predicted, Elk4_predicted, Zfp509_predicted, Smtm, Spred2, Pbk_predicted, Dock9, Ap1m1, Sgcz_predicted, Myst3, Dok3_predicted, Dsc1_predicted, Sncaip_predicted, Cd226_predicted, Brd7_predicted, Cotl1_predicted, Ppfia3, Tubgcp5_predicted, Nmb_predicted, Eed_predicted, Sf3b2_predicted, Wnt8b_predicted, Ccna2, Ppp2r4_predicted, Snap23, Mpp6_predicted, Mcm2_predicted, Plxnd1_predicted, lpp_predicted, Sync_predicted, Eif4g3_predicted, Mthfr_predicted, Ddef2_predicted, Mgea6_predicted, Ches1_predicted, Dicer1, Ankrd24_predicted, Brd4, Plxnc1_predicted, Eea1_predicted, Plxnb2, Itgb7, Pin1_predicted, Smarca4, Eif5b, Klf7_predicted, Rpe_predicted, Rap1b | 290354, 25285, 83785, 363294, 316531, 301430, 63840, 301252, 399475, 171081, 301020, 140914, 24600, 81737, 25569, 25731, 64563, 25730, 64896, 25556, 286928, 301514, 65040, 29365, 140610, 81531, 60374, 94268, 64183, 310632, 117051, 59293, 171100, 311456, 84496, 85240, 25267, 81763, 59325, 65262, 307505, 364430, 81668, 245962, 117269, 292763, 29657, 293721, 24505, 113894, 303200, 619436, 24779, 24575, 117275, 288557, 360801, 114635, 305614, 305884, 171378, 114765, 291852, 24684, 310467, 81657, 54278, 311187, 362251, 297480, 312670, 297930, 25716, 366962, 124461, 84582, 192183, 316626, 363520, 81733, 246334, 289350, 60563, 362827, 25539, 287524, 360606, 245924, 304056, 266780, 304528, 304786, 305428, 289734, 305539, 290326, 259237, 306332, 364605, 306571, 306760, 291759, 307309, 307199, 361374, 361422, 140591, 308663, 308751, 293104, 293671, 293990, 114494, 362102, 64630, 362359, 312538, 312652, 298439, 362606, 298573, 362657, 362719, 299078, 314374, 299284, 299639, 362844, 362873, 314764, 315217, 25713, 298696, 171379, 308306, 363243, 316460, 171337 |
| transferase activity, transferring hexosyl groups | 0.00160576 | 12  | 4.48   | Pomgnt1, Fut4, Pygl, Fut11, B3gnt6_predicted, Ugt1a1, Udpgr2, Ugt2a1, Alg5, B4galt6, Galnt2_predicted, Mtap_predicted                                                                                                                                                                                                                                                                                                                                                                                                                                                                                                                                                                                                                                                                                                                                                                                                                                                                                                                                                                                                                                                                    | 362567, 60670, 64035, 286971, 293667, 24861, 286954, 63867, 295051, 65196, 292090, 298227                                                                                                                                                                                                                                                                                                                                                                                                                                                                                                                                                                                                                                                                                                                                                                                                                                                                                                                                                                                                               |
| binding                                           | 0.00301622 | 291 | 262.01 | Tacc2, Tbx6_predicted, Ctsc, Tnfrsf1b, Rock2, Hpcal1, Zfp384, Fzd1, Itpr1, S100a11, Lmo4, Kcnd3, Notch2, Arhgef2, Dlgap4, Rcn1_predicted, Pscdbp, C8g_predicted, Acvr1, Ptgds, Lynx1_predicted, Myf6, Eef2, Slc2a1, Pla2g2a, Frap1, Rpl22, Casp9, Hes5, Camkk2, Zcchc8_predicted, Dynll1, Tnk2, Clcn2, Ap2m1, Apg3l, Abcb10, Rbm10, Mid1, Syp, Phb, Ppp1r3b, Myr8, Wnt5a, Rab3a, H2afy, Ntrk2, Inhba, Fbp1, Stat3, Timp2, Prm2, Snip, Gabrg2, Mam11_predicted, Ntn1, Rasd1, Atp1b2, Lnx2_predicted, Pxn, Stx1a, Gtf2ird1, Serpine1, Ramp2, Ccl11, Flot2, Col23a1, Dlgh4, Aoc3, Lin7a, Nfe2, Wnt7b, Grip1, Cyp2d22, Avpr2, Msn, Fhl1, Abcd3, Gstm1, Pola2, Tagln, Asb2, Anpep, Csrp3, Inpp1, Notch4, Ltb, Cdon, Ireb2, Tgfb2, Dpt_predicted, Csrp1, Lbr, Lhx9, Fkbp1a, Lin7c, Chgb, Acp2, Ptk2b, Pdlim2, Igfbp5, Vegfa, Twsg1_predicted, Tuba4a, Orc2l, Per2, Hspcb, Adm2, Csf2rb1, Cntn1, Smarcc1_predicted, C3ar1, Oldlr1, Nos3, Ntf3,                                                                                                                                                                                                                                                  | 309025, 365371, 25423, 156767, 25537, 50871, 171018, 58868, 25262, 445415, 362051, 65195, 29492, 310635, 286930, 362182, 311047, 296545, 79558, 25526, 300018, 25714, 29565, 24778, 29692, 56718, 81768, 58918, 79225, 83506, 288661, 58945, 303882, 29232, 116563, 171415, 361439, 64510, 54252, 24804, 25344, 192280, 192253, 64566, 25531, 29384, 25054, 29200, 24362, 25125, 29543, 25345, 56029, 29709, 303101, 114523, 64455, 24214, 360761, 360820, 116470, 246770, 24617, 58966, 29397, 83764, 353303, 29495, 29473, 85327, 366998, 315196, 84016, 171522, 25108, 81521, 25177, 25270, 24423, 85242, 25123, 299266, 81641,                                                                                                                                                                                                                                                                                                                                                                                                                                                                      |

|                               |            |    |       |                                                                                                                                                                                                                                                                                                                                                                                                                                                                                                                                                                                                                                                                                                                                                                                                                                                                                                                                                                                                                                                                                                                                                                                                                                                                                                                                                                                                                                                                                                                                                                                                                                                                                                                                                                                                                                                                                                                                                                                                                                                              |                                                                                                                                                                                                                                                                                                                                                                                                                                                                                                                                                                                                                                                                                                                                                                                                                                                                                                                                                                                                                                                                                                                                                                                                                                                                                                                                                                                                                                                                                                                                                                                                                                                                    |
|-------------------------------|------------|----|-------|--------------------------------------------------------------------------------------------------------------------------------------------------------------------------------------------------------------------------------------------------------------------------------------------------------------------------------------------------------------------------------------------------------------------------------------------------------------------------------------------------------------------------------------------------------------------------------------------------------------------------------------------------------------------------------------------------------------------------------------------------------------------------------------------------------------------------------------------------------------------------------------------------------------------------------------------------------------------------------------------------------------------------------------------------------------------------------------------------------------------------------------------------------------------------------------------------------------------------------------------------------------------------------------------------------------------------------------------------------------------------------------------------------------------------------------------------------------------------------------------------------------------------------------------------------------------------------------------------------------------------------------------------------------------------------------------------------------------------------------------------------------------------------------------------------------------------------------------------------------------------------------------------------------------------------------------------------------------------------------------------------------------------------------------------------------|--------------------------------------------------------------------------------------------------------------------------------------------------------------------------------------------------------------------------------------------------------------------------------------------------------------------------------------------------------------------------------------------------------------------------------------------------------------------------------------------------------------------------------------------------------------------------------------------------------------------------------------------------------------------------------------------------------------------------------------------------------------------------------------------------------------------------------------------------------------------------------------------------------------------------------------------------------------------------------------------------------------------------------------------------------------------------------------------------------------------------------------------------------------------------------------------------------------------------------------------------------------------------------------------------------------------------------------------------------------------------------------------------------------------------------------------------------------------------------------------------------------------------------------------------------------------------------------------------------------------------------------------------------------------|
|                               |            |    |       | Trh, Syt3, Nphs1, Pglyrp1, Ntf5, Nlc1, Il1r1l, Abi2, Bcs1l, Dlgap1, Dio1, Mpdz, Dbccr1, Atpbd1b_predicted, Pfn2, Lmna, Efna1, Pde4dip, Rab25_predicted, Arfrp1, Rgs19, Angptl2, Mkks, Stau1, Plcb2, Sycp2, Pdgfra, Rpl5, Ereg, Atp5a1, Cxxc5, Catna1, Tdrd3, Nufip1, Gnrrh, Sf3a1_predicted, Cd48, Rps6ka2, Map4k1_predicted, Kdelr1, Arntl, Eif3s8, Taf6l_predicted, Ganab_predicted, Ins1, Sqstm1, Map2k3, Thrap4, Slc4a1, Sox9, Srp68_predicted, Mx1, Chrd, Mospd3, Ncor2_predicted, Fln29, Spnb2, Acin1, Ppp3cc, Wbp4, Nol4_predicted, Katnb1, Aprt_predicted, Prlr, Tiparp_predicted, Gabbr1, Nr4a2, Pacsin3, Elf5_predicted, Rnpc2, Foxp1, Adipor2, Adhfe1, Wwp1, Dspg3_predicted, Syt1, Ankrd46, Grap2, Pacsin2, Hdac7a, Pvrl1, Pcbp4_predicted, Hes6, Irak1_predicted, Nell1, Trp63, Rab3gap2, Hr, Slc14a2, Efcfbp2, Pias4, Sag, Trim16_predicted, Rpa1, Itga3_predicted, Cdc6_predicted, Sfrs15, Prdm15_predicted, Zfp295_predicted, Lass4_predicted, Zfp68_predicted, Rimbpb2, Fbxl10, Rfc5_predicted, Elk4_predicted, Zfp509_predicted, Smtn, Spred2, Pbk_predicted, Dock9, Ap1m1, Sgcz_predicted, Myst3, Dok3_predicted, Zfp169_predicted, Dsc1_predicted, Sncap_predicted, Cd226_predicted, Nkd1_predicted, Brd7_predicted, Tnpo2_predicted, Rbm35b_predicted, Cotl1_predicted, Snai3_predicted, Ppfia3, Tubgcp5_predicted, Nmb_predicted, Eed_predicted, Th, Sf3b2_predicted, Wnt8b_predicted, Ccna2, Mbnl1, Ppp2r4_predicted, Ciz1_predicted, Hoxd4_predicted, Ehf_predicted, Pla2g4b_predicted, Snap23, Epb4.2_predicted, Zfp217_predicted, Mpp6_predicted, Mcm2_predicted, Plxnd1_predicted, Mysm1_predicted, lpp_predicted, Sync_predicted, Eif4g3_predicted, Mthfr_predicted, Centb5_predicted, Ddef2_predicted, Mgea6_predicted, Ches1_predicted, Dicer1, Baz2a_predicted, Ankrd24_predicted, Polrmt_predicted, Brd4, Plxnc1_predicted, Eea1_predicted, Stat6_predicted, Plxnb2, Itgb7, Pin1_predicted, Smarca4, Mrpl3_predicted, Xpo5_predicted, Eif5b, Klf7_predicted, Rpe_predicted, Mmp2, Eef2k, Oprl1, Asph_predicted, Rap1b, Pvalb | 117505, 65038, 406162, 361795, 50938, 64831, 81809, 289178, 29276, 89789, 289048, 25639, 60442, 24259, 24162, 50646, 290354, 25285, 83785, 363294, 316531, 301430, 63840, 301252, 399475, 171081, 117258, 301020, 84007, 140914, 24600, 81737, 25569, 25731, 64563, 84387, 25730, 64896, 25556, 286928, 301514, 65040, 25430, 29365, 140610, 362614, 81531, 60374, 94268, 64183, 310632, 117051, 59293, 171100, 311456, 84496, 85240, 83820, 25267, 81763, 59325, 65262, 291670, 307505, 306066, 364430, 81668, 305479, 245962, 117269, 292763, 361577, 29657, 293484, 309194, 293721, 24505, 113894, 303200, 619436, 24779, 140586, 363707, 24575, 117275, 288557, 360801, 114635, 305614, 305884, 171378, 114765, 307553, 291852, 292072, 24684, 310467, 81657, 54278, 311187, 366142, 362251, 297480, 312670, 362474, 297930, 314772, 25716, 299982, 366962, 124461, 84582, 192183, 363133, 316626, 363520, 81733, 246334, 289350, 60563, 54302, 170928, 362827, 25539, 303214, 287524, 360606, 360621, 245924, 304054, 304056, 304208, 304337, 266780, 304495, 304528, 304786, 305428, 289734, 305539, 290326, 259237, 306332, 364605, 306571, 306760, 306816, 291759, 307309, 307199, 364952, 361374, 304670, 307810, 361422, 307919, 140591, 308663, 308751, 293104, 25085, 293671, 293990, 114494, 282635, 362102, 296639, 288153, 295965, 311341, 64630, 362202, 311764, 362359, 312538, 312652, 298247, 298439, 362606, 298573, 362657, 313772, 362719, 299078, 314374, 299284, 304601, 299639, 299604, 362844, 362873, 314764, 362896, 315217, 25713, 298696, 171379, 300974, 363194, 308306, 363243, 316460, 81686, 25435, 29256, 312981, 171337, 25269 |
| protein dimerization activity | 0.00338682 | 22 | 11.75 | S100a11, Notch2, Dynll1, Stat3, Stx1a, Ramp2, Aoc3, Pola2, Notch4, Tgfb2, Vegfa, Tuba4a, Pdgfra, Ereg, Katnb1, Prlr, Foxp1, Adipor2, Pvrl1, Rab3gap2, Ppp2r4_predicted, Eea1_predicted                                                                                                                                                                                                                                                                                                                                                                                                                                                                                                                                                                                                                                                                                                                                                                                                                                                                                                                                                                                                                                                                                                                                                                                                                                                                                                                                                                                                                                                                                                                                                                                                                                                                                                                                                                                                                                                                       | 445415, 29492, 58945, 25125, 116470, 58966, 29473, 85242, 406162, 81809, 83785, 316531, 25267, 59325, 291852, 24684, 297480, 312670, 192183, 289350, 362102, 314764                                                                                                                                                                                                                                                                                                                                                                                                                                                                                                                                                                                                                                                                                                                                                                                                                                                                                                                                                                                                                                                                                                                                                                                                                                                                                                                                                                                                                                                                                                |

|                                                                 |            |    |      |                                                                                                                                             |                                                                                                           |
|-----------------------------------------------------------------|------------|----|------|---------------------------------------------------------------------------------------------------------------------------------------------|-----------------------------------------------------------------------------------------------------------|
| transferase activity, transferring glycosyl groups              | 0.00576501 | 14 | 6.55 | Pomgnt1, Fut4, Pygl, Fut11, B3gnt6_predicted, Ugt1a1, Udpgr2, Ugt2a1, Upp1, Aprt_predicted, Alg5, B4galt6, Galnt2_predicted, Mtap_predicted | 362567, 60670, 64035, 286971, 293667, 24861, 286954, 63867, 289801, 292072, 295051, 65196, 292090, 298227 |
| eukaryotic translation initiation factor 2alpha kinase activity | 0.00660461 | 2  | 0.14 | Eif2ak3, Eif2ak4_predicted                                                                                                                  | 29702, 114859                                                                                             |
| neurotrophin p75 receptor binding                               | 0.00660461 | 2  | 0.14 | Ntf3, Ntf5                                                                                                                                  | 81737, 25730                                                                                              |
| protein heterodimerization activity                             | 0.00697578 | 14 | 6.69 | Notch2, Stx1a, Ramp2, Pola2, Notch4, Tgfb2, Tuba4a, Ereg, Katnb1, Foxp1, Adipor2, Pvr11, Rab3gap2, Ppp2r4_predicted                         | 29492, 116470, 58966, 85242, 406162, 81809, 316531, 59325, 291852, 297480, 312670, 192183, 289350, 362102 |
| growth factor binding                                           | 0.00949646 | 7  | 2.41 | Acvr1, Ntrk2, Igfbp5, Csf2rb1, Ntf3, Pdgfra, Ins1                                                                                           | 79558, 25054, 25285, 171081, 81737, 25267, 24505                                                          |

**GO category "cellular\_component"**

Number of genes annotated in GO: 435  
 Number of significant GO groups found: 9

| GO group           | p-value    | # genes (observed) | # genes (expected) | list of genes                                                                                                                                                                                                                                                                                                                                                                                                                                                                                                                                                                                                                                                                                                                                                                                                                                                                                                                                                                                                                                                                                                                                                                  | GeneIDs                                                                                                                                                                                                                                                                                                                                                                                                                                                                                                                                                                                                                |
|--------------------|------------|--------------------|--------------------|--------------------------------------------------------------------------------------------------------------------------------------------------------------------------------------------------------------------------------------------------------------------------------------------------------------------------------------------------------------------------------------------------------------------------------------------------------------------------------------------------------------------------------------------------------------------------------------------------------------------------------------------------------------------------------------------------------------------------------------------------------------------------------------------------------------------------------------------------------------------------------------------------------------------------------------------------------------------------------------------------------------------------------------------------------------------------------------------------------------------------------------------------------------------------------|------------------------------------------------------------------------------------------------------------------------------------------------------------------------------------------------------------------------------------------------------------------------------------------------------------------------------------------------------------------------------------------------------------------------------------------------------------------------------------------------------------------------------------------------------------------------------------------------------------------------|
| synapse            | 0.00068348 | 14                 | 5.23               | Itpr1, Slc32a1, Dlgap4, Syp, Dlgh4, Lin7a, Lin7c, Clstn3, Syt3, Dlgap1, Syt1, Pvr11, Sncaip_predicted, Sync_predicted                                                                                                                                                                                                                                                                                                                                                                                                                                                                                                                                                                                                                                                                                                                                                                                                                                                                                                                                                                                                                                                          | 25262, 83612, 286930, 24804, 29495, 85327, 60442, 171393, 25731, 65040, 25716, 192183, 307309, 362606                                                                                                                                                                                                                                                                                                                                                                                                                                                                                                                  |
| intracellular part | 0.00125542 | 241                | 209.77             | Tbx6_predicted, Ctsc, Pde4b, Rock2, M6pr, Zfp384, Itpr1, Eif2ak3, S100a11, Lmo4, Notch2, Rcn1_predicted, Pscdbp, Ptgds, Myf6, Fgf22, Slc2a1, Frap1, Nt5c1a_predicted, Rpl22, Casp9, Dynll1, Cyb5, Hrasls_predicted, Tnk2, Clcn2, Ap2m1, Apg3l, Ldhd, Mvd, Abcb10, Rbm10, Mid1, Syp, Phb, Ppp1r3b, Myr8, Rab3a, H2afy, Nmt2, Ntrk2, Fbp1, Stat3, Timp2, Prm2, Snip, Gabrg2, Maml1_predicted, Rasd1, Atp1b2, Tekt1, Pxn, Stx1a, Gtf2ird1, Ramp2, Dlgh4, Nfe2, Cyp2d22, Avpr2, Msn, Abcd3, Pola2, Mapkapk3, Fnta, Ap3b2_predicted, Anpep, Csrp3, Inpp11, Cln3, Cuzd1, Notch4, Ireb2, Tgfb2, Csrp1, Lbr, Ptpn7, Entpd6, Chgb, Acp2, Tep1, Ndr2, Vegfa, Tuba4a, Orc2l, Per2, Hspcb, Smarcc1_predicted, Slc35b4_predicted, Opn1sw, Nos3, Ntf3, Trh, Ckm, Slc27a5, B3gnt6_predicted, Nlcn1, Slc29a2, Ngep, Abi2, Bcs1l, Mrpl37, Pfn2, Sv2c, Lmna, Pde4dip, Pelo, Rgs19, Stau1, Plcb2, Sycp2, Rpl5, Atp5a1, Txnl1, Acaa2, Sucla2_predicted, Nufip1, Spergen2, Sf3a1_predicted, Rps6ka2, Kdelr1, Arntl, Eif3s8, Tcigr1, Taf6l_predicted, Ganab_predicted, Poll, Sqstm1, Thrap4, Vat1, Slc4a1, Sox9, Srp68_predicted, Mx1, Ncor2_predicted, Spnb2, Acin1, Ppp3cc, Wbp4, Actr8_predicted, | 365371, 25423, 24626, 25537, 312689, 171018, 25262, 29702, 445415, 362051, 29492, 362182, 311047, 25526, 25714, 170579, 24778, 56718, 313574, 81768, 58918, 58945, 64001, 288025, 303882, 29232, 116563, 171415, 307858, 81726, 361439, 64510, 54252, 24804, 25344, 192280, 192253, 25531, 29384, 291318, 25054, 24362, 25125, 29543, 25345, 56029, 29709, 303101, 64455, 24214, 85270, 360820, 116470, 246770, 58966, 29495, 366998, 171522, 25108, 81521, 25270, 85242, 315994, 25318, 308777, 81641, 117505, 65038, 293485, 117179, 406162, 64831, 81809, 29276, 89789, 246781, 85260, 24259, 24162, 64523, 171114, |

|               |            |     |        |                                                                                                                                                                                                                                                                                                                                                                                                                                                                                                                                                                                                                                                                                                                                                                                                                                                                                                                                                                                                                                                                                                                                                                                                                                                                                                                                     |                                                                                                                                                                                                                                                                                                                                                                                                                                                                                                                                                                                                                                                                                                                                                                                                                                                                                                                                                                                                                                                                                                                                                                                                                                                                                        |
|---------------|------------|-----|--------|-------------------------------------------------------------------------------------------------------------------------------------------------------------------------------------------------------------------------------------------------------------------------------------------------------------------------------------------------------------------------------------------------------------------------------------------------------------------------------------------------------------------------------------------------------------------------------------------------------------------------------------------------------------------------------------------------------------------------------------------------------------------------------------------------------------------------------------------------------------------------------------------------------------------------------------------------------------------------------------------------------------------------------------------------------------------------------------------------------------------------------------------------------------------------------------------------------------------------------------------------------------------------------------------------------------------------------------|----------------------------------------------------------------------------------------------------------------------------------------------------------------------------------------------------------------------------------------------------------------------------------------------------------------------------------------------------------------------------------------------------------------------------------------------------------------------------------------------------------------------------------------------------------------------------------------------------------------------------------------------------------------------------------------------------------------------------------------------------------------------------------------------------------------------------------------------------------------------------------------------------------------------------------------------------------------------------------------------------------------------------------------------------------------------------------------------------------------------------------------------------------------------------------------------------------------------------------------------------------------------------------------|
|               |            |     |        | Nol4_predicted, Wdr33_predicted, Katnb1, Txnl4b, Aprt_predicted, Gabbr1, Nr4a2, Pacsin3, Elf5_predicted, Rnpc2, Tnnc2, Foxp1, Lactb2, Wwp1, Syt1, Grap2, Pacsin2, Hdac7a, Gup1_predicted, Hes6, Nell1, Trp63, Hr, Efcbp2, Pias4, Sag, Zfp287_predicted, Trim16_predicted, Alox12_predicted, Rpa1, Psm11_predicted, Cdc6_predicted, Prdm15_predicted, Lass4_predicted, Fbxl10, Rfc5_predicted, Smtn, Spred2, Pck2_predicted, Adprt1, Ap1m1, Sgcz_predicted, Myst3, Dok3_predicted, Zfp169_predicted, Sncaip_predicted, Spire1_predicted, Brd7_predicted, Tnpo2_predicted, Snai3_predicted, Galnt2_predicted, Rnaset2_predicted, Ankrd27_predicted, Tph1, Tubgcp5_predicted, Mkrn3_predicted, Eed_predicted, Mrvi1_predicted, Th, Sf3b2_predicted, Wnt8b_predicted, Hps3_predicted, Ccna2, Mbnl1, Flg, Brd3_predicted, Ppp2r4_predicted, Ciz1_predicted, Hoxd4_predicted, Ehf_predicted, Pla2g4b_predicted, Snap23, Epb4.2_predicted, Alms1_predicted, Mcm2_predicted, Mysm1_predicted, lpp_predicted, Sync_predicted, Eif4g3_predicted, Centb5_predicted, Ches1_predicted, Baz2a_predicted, Polrmt_predicted, Brd4, Eea1_predicted, Stat6_predicted, Kdelr3_predicted, Itgb7, Pin1_predicted, Smarca4, Xrn1_predicted, Mrpl3_predicted, Als2, Vil1_predicted, Neu4_predicted, Mmp2, Gcsh, Eef2k, Tead3, Asph_predicted, Pvalb, Pthr1 | 83785, 316531, 301430, 63840, 301252, 301020, 296969, 81644, 24600, 81737, 25569, 24265, 79111, 293667, 64896, 65194, 367318, 286928, 301514, 56281, 81531, 29643, 60374, 64183, 294754, 59293, 84496, 85240, 83820, 81763, 65262, 140922, 170465, 361071, 364430, 305491, 305479, 117269, 361577, 29657, 293484, 293650, 309194, 293721, 361767, 113894, 619436, 287721, 24779, 140586, 363707, 24575, 360801, 305614, 305884, 171378, 114765, 361107, 307553, 307524, 291852, 292008, 292072, 81657, 54278, 311187, 366142, 362251, 296369, 297480, 297768, 297930, 25716, 366962, 124461, 84582, 301073, 316626, 81733, 246334, 60563, 170928, 362827, 25539, 303212, 303214, 287454, 287524, 303353, 360621, 304054, 304208, 304495, 304528, 289734, 305539, 361042, 361046, 306332, 364605, 306571, 306760, 306816, 307309, 307348, 361374, 304670, 307919, 292090, 292306, 361555, 24848, 308663, 292988, 293104, 308899, 25085, 293671, 293990, 310288, 114494, 282635, 24641, 362092, 362102, 296639, 288153, 295965, 311341, 64630, 362202, 297408, 312538, 298247, 298439, 362606, 298573, 313772, 314374, 304601, 299604, 362844, 314764, 362896, 315131, 25713, 298696, 171379, 300944, 300974, 363235, 316521, 316642, 81686, 171133, 25435, 294299, 312981, 25269, 56813 |
| synaptosome   | 0.00138841 | 7   | 1.73   | Syp, Dlgh4, Lin7c, Acp2, Pvr1, Itga3_predicted, Als2                                                                                                                                                                                                                                                                                                                                                                                                                                                                                                                                                                                                                                                                                                                                                                                                                                                                                                                                                                                                                                                                                                                                                                                                                                                                                | 24804, 29495, 60442, 24162, 192183, 360606, 363235                                                                                                                                                                                                                                                                                                                                                                                                                                                                                                                                                                                                                                                                                                                                                                                                                                                                                                                                                                                                                                                                                                                                                                                                                                     |
| intracellular | 0.00188359 | 245 | 215.05 | Tbx6_predicted, Ctsc, Pde4b, Rock2, M6pr, Zfp384, Itpr1, Eif2ak3, S100a11, Lmo4, Notch2, Rcn1_predicted, Pscdbp, Ptgs, Myf6, Fgf22, Slc2a1, Frap1, Nt5c1a_predicted, Rpl22, Casp9, Camkk2, Dynll1, Cyb5, Hrasls_predicted, Tnk2, Clcn2, Ap2m1, Apg3l, Ldhd, Mvd, Abcb10, Rbm10, Mid1, Syp, Phb, Ppp1r3b, Myr8, Rab3a, H2afy, Nmt2, Ntrk2, Fbp1, Stat3, Timp2, Prm2, Snip, Gabrg2, Maml1_predicted, Rasd1, Atp1b2, Tekt1, Pxn, Stx1a, Gtf2ird1, Ramp2, Dlgh4, Nfe2, Cyp2d22, Avpr2, Msn, Abcd3, Pola2, Mapkapk3, Fnta, Ap3b2_predicted, Anpep, Csrp3, Inpp1, Cln3, Cuzd1, Notch4, Ireb2, Tgfb2, Csrp1, Lbr, Ptpn7, Entpd6, Chgb, Acp2, Tep1, Ndrg2, Vegfa, Tuba4a, Orc2l,                                                                                                                                                                                                                                                                                                                                                                                                                                                                                                                                                                                                                                                            | 365371, 25423, 24626, 25537, 312689, 171018, 25262, 29702, 445415, 362051, 29492, 362182, 311047, 25526, 25714, 170579, 24778, 56718, 313574, 81768, 58918, 83506, 58945, 64001, 288025, 303882, 29232, 116563, 171415, 307858, 81726, 361439, 64510, 54252, 24804, 25344, 192280, 192253, 25531, 29384, 291318, 25054, 24362, 25125, 29543,                                                                                                                                                                                                                                                                                                                                                                                                                                                                                                                                                                                                                                                                                                                                                                                                                                                                                                                                           |



|                 |            |    |       |                                                                                                                                                                                                                                                                                                                                                                                                                                                                                                                                                                                                                                                                                                                                                                                                                                                                                                                                                                                                                                                                                                                                                                                                                                                                                                                                                                                                                                                                                                                                                                                                                                                                                                                                                                                                                                                                                             |                                                                                                                                                                                                                                                                                                                                                                                                                                                                                                                                                                                                                                                                                                                                                                                                                                                                                                                                                                                                                                                                                                                                                                                                                                                                                                                                                                                                                                                                                                                                                                                                 |
|-----------------|------------|----|-------|---------------------------------------------------------------------------------------------------------------------------------------------------------------------------------------------------------------------------------------------------------------------------------------------------------------------------------------------------------------------------------------------------------------------------------------------------------------------------------------------------------------------------------------------------------------------------------------------------------------------------------------------------------------------------------------------------------------------------------------------------------------------------------------------------------------------------------------------------------------------------------------------------------------------------------------------------------------------------------------------------------------------------------------------------------------------------------------------------------------------------------------------------------------------------------------------------------------------------------------------------------------------------------------------------------------------------------------------------------------------------------------------------------------------------------------------------------------------------------------------------------------------------------------------------------------------------------------------------------------------------------------------------------------------------------------------------------------------------------------------------------------------------------------------------------------------------------------------------------------------------------------------|-------------------------------------------------------------------------------------------------------------------------------------------------------------------------------------------------------------------------------------------------------------------------------------------------------------------------------------------------------------------------------------------------------------------------------------------------------------------------------------------------------------------------------------------------------------------------------------------------------------------------------------------------------------------------------------------------------------------------------------------------------------------------------------------------------------------------------------------------------------------------------------------------------------------------------------------------------------------------------------------------------------------------------------------------------------------------------------------------------------------------------------------------------------------------------------------------------------------------------------------------------------------------------------------------------------------------------------------------------------------------------------------------------------------------------------------------------------------------------------------------------------------------------------------------------------------------------------------------|
|                 |            |    |       | Per2, Hspcb, Smarcc1_predicted, Slc35b4_predicted, Opn1sw, Nos3, Ntf3, Trh, Ckm, Slc27a5, B3gnt6_predicted, Nolc1, Slc29a2, Ngep, Abi2, Bcs1l, Mrpl37, Pfn2, Sv2c, Lmna, Pde4dip, Pelo, Rgs19, Stau1, Plcb2, Sycp2, Rpl5, Atp5a1, Txnl1, Acaa2, Sucla2_predicted, Nufip1, Spergen2, Sf3a1_predicted, Rps6ka2, Kdelr1, Arntl, Eif3s8, Tcigr1, Taf6l_predicted, Ganab_predicted, Poll, Sqstm1, Thrap4, Vat1, Slc4a1, Sox9, Srp68_predicted, Mx1, Ncor2_predicted, Spnb2, Acin1, Ppp3cc, Wbp4, Actr8_predicted, Nol4_predicted, Wdr33_predicted, Katnb1, Txnl4b, Aprt_predicted, Gabbr1, Nr4a2, Pacsin3, Elf5_predicted, Eif2ak4_predicted, Rnpc2, Tnnc2, Foxp1, Lactb2, Wwp1, Syt1, Grap2, Pacsin2, Hdac7a, Gup1_predicted, Hes6, Nell1, Trp63, Hr, Efcfbp2, Pias4, Sag, Zfp287_predicted, Trim16_predicted, Alox12_predicted, Rpa1, Psm11_predicted, Cdc6_predicted, Prdm15_predicted, Lass4_predicted, Zfp68_predicted, Fbxl10, Rfc5_predicted, Smtn, Spred2, Pck2_predicted, Adprt1, Ap1m1, Sgcz_predicted, Myst3, Dok3_predicted, Zfp169_predicted, Sncaip_predicted, Spire1_predicted, Brd7_predicted, Tnp2_predicted, Snai3_predicted, Galnt2_predicted, Rnaset2_predicted, Ankrd27_predicted, Tph1, Tubgcp5_predicted, Mkrn3_predicted, Eed_predicted, Mrvi1_predicted, Th, Sf3b2_predicted, Wnt8b_predicted, Hps3_predicted, Ccna2, Mbnl1, Flg, Brd3_predicted, Ppp2r4_predicted, Ciz1_predicted, Hoxd4_predicted, Ehf_predicted, Pla2g4b_predicted, Snap23, Epb4.2_predicted, Alms1_predicted, Mcm2_predicted, Mym1_predicted, lpp_predicted, Sync_predicted, Eif4g3_predicted, Centb5_predicted, Ches1_predicted, Dicer1, Baz2a_predicted, Polrmt_predicted, Brd4, Eea1_predicted, Stat6_predicted, Kdelr3_predicted, Itgb7, Pin1_predicted, Smarca4, Xrn1_predicted, Mrpl3_predicted, Als2, Vil1_predicted, Neu4_predicted, Mmp2, Gcsh, Eef2k, Tead3, Asph_predicted, Pvalb, Pthr1 | 25345, 56029, 29709, 303101, 64455, 24214, 85270, 360820, 116470, 246770, 58966, 29495, 366998, 171522, 25108, 81521, 25270, 85242, 315994, 25318, 308777, 81641, 117505, 65038, 293485, 117179, 406162, 64831, 81809, 29276, 89789, 246781, 85260, 24259, 24162, 64523, 171114, 83785, 316531, 301430, 63840, 301252, 301020, 296969, 81644, 24600, 81737, 25569, 24265, 79111, 293667, 64896, 65194, 367318, 286928, 301514, 56281, 81531, 29643, 60374, 64183, 294754, 59293, 84496, 85240, 83820, 81763, 65262, 140922, 170465, 361071, 364430, 305491, 305479, 117269, 361577, 29657, 293484, 293650, 309194, 293721, 361767, 113894, 619436, 287721, 24779, 140586, 363707, 24575, 360801, 305614, 305884, 171378, 114765, 361107, 307553, 307524, 291852, 292008, 292072, 81657, 54278, 311187, 366142, 114859, 362251, 296369, 297480, 297768, 297930, 25716, 366962, 124461, 84582, 301073, 316626, 81733, 246334, 60563, 170928, 362827, 25539, 303212, 303214, 287454, 287524, 303353, 360621, 304054, 304208, 304337, 304495, 304528, 289734, 305539, 361042, 361046, 306332, 364605, 306571, 306760, 306816, 307309, 307348, 361374, 304670, 307919, 292090, 292306, 361555, 24848, 308663, 292988, 293104, 308899, 25085, 293671, 293990, 310288, 114494, 282635, 24641, 362092, 362102, 296639, 288153, 295965, 311341, 64630, 362202, 297408, 312538, 298247, 298439, 362606, 298573, 313772, 314374, 299284, 304601, 299604, 362844, 314764, 362896, 315131, 25713, 298696, 171379, 300944, 300974, 363235, 316521, 316642, 81686, 171133, 25435, 294299, 312981, 25269, 56813 |
| cell projection | 0.00190982 | 29 | 16.37 | Cntn4, S100a11, Kcnd3, Arhgef2, Slc34a3, Tnk2, Clcn2, Timp2, Pxn, Msn, Tgfb2, Fkbp1a, Mep1a, Opn1sw, Grm8, Abi2, Stau1, Catna1, Katnb1, Syt1, Pvr11, Nfasc, Tph1, Th, Trpm6, Alms1_predicted, Vil1_predicted, Pvalb, Pthr1                                                                                                                                                                                                                                                                                                                                                                                                                                                                                                                                                                                                                                                                                                                                                                                                                                                                                                                                                                                                                                                                                                                                                                                                                                                                                                                                                                                                                                                                                                                                                                                                                                                                  | 116658, 445415, 65195, 310635, 246234, 303882, 29232, 29543, 360820, 81521, 81809, 25639, 25684, 81644, 60590,                                                                                                                                                                                                                                                                                                                                                                                                                                                                                                                                                                                                                                                                                                                                                                                                                                                                                                                                                                                                                                                                                                                                                                                                                                                                                                                                                                                                                                                                                  |

|                                                   |            |    |       |                                                                                                                                                                                                                                                                                                                                                                                                                                                                                                                                                                                                                                                                                                                                                                                                                                                                                                                         |                                                                                                                                                                                                                                                                                                                                                                                                                                                                                                                                                                                                                                                                                                                                                |
|---------------------------------------------------|------------|----|-------|-------------------------------------------------------------------------------------------------------------------------------------------------------------------------------------------------------------------------------------------------------------------------------------------------------------------------------------------------------------------------------------------------------------------------------------------------------------------------------------------------------------------------------------------------------------------------------------------------------------------------------------------------------------------------------------------------------------------------------------------------------------------------------------------------------------------------------------------------------------------------------------------------------------------------|------------------------------------------------------------------------------------------------------------------------------------------------------------------------------------------------------------------------------------------------------------------------------------------------------------------------------------------------------------------------------------------------------------------------------------------------------------------------------------------------------------------------------------------------------------------------------------------------------------------------------------------------------------------------------------------------------------------------------------------------|
|                                                   |            |    |       |                                                                                                                                                                                                                                                                                                                                                                                                                                                                                                                                                                                                                                                                                                                                                                                                                                                                                                                         | 286928, 84496, 307505, 291852, 25716, 192183, 116690, 24848, 25085, 293874, 297408, 316521, 25269, 56813                                                                                                                                                                                                                                                                                                                                                                                                                                                                                                                                                                                                                                       |
| neuron projection                                 | 0.00285938 | 17 | 8.06  | Cntn4, Kcnd3, Arhgef2, Tnk2, Timp2, Tgfb2, Fkbp1a, Grm8, Abi2, Stau1, Katnb1, Syt1, Pvrl1, Nfasc, Tph1, Th, Pvalb                                                                                                                                                                                                                                                                                                                                                                                                                                                                                                                                                                                                                                                                                                                                                                                                       | 116658, 65195, 310635, 303882, 29543, 81809, 25639, 60590, 286928, 84496, 291852, 25716, 192183, 116690, 24848, 25085, 25269                                                                                                                                                                                                                                                                                                                                                                                                                                                                                                                                                                                                                   |
| secretory granule                                 | 0.00493614 | 8  | 2.69  | Itpr1, Ap2m1, Stx1a, Cuzd1, Tgfb2, Chgb, Trh, Syt1                                                                                                                                                                                                                                                                                                                                                                                                                                                                                                                                                                                                                                                                                                                                                                                                                                                                      | 25262, 116563, 116470, 117179, 81809, 24259, 25569, 25716                                                                                                                                                                                                                                                                                                                                                                                                                                                                                                                                                                                                                                                                                      |
| plasma membrane                                   | 0.00622192 | 96 | 75.73 | Cntn4, Zfp384, Itpr1, Kcnd3, Notch2, Slc32a1, Slc34a3, Acvr1, Lynx1_predicted, Slc2a1, Htr1d, Clcn2, Kcnj6, Phb, Testin, Ntrk2, Stat3, Cd7_predicted, Gabrg2, Atp1b2, Pxn, Stx1a, Ramp2, Flot2, Dlgh4, Aoc3, Lin7a, Grip1, Avpr2, Msn, Htr3b, Anpep, Cln3, Prss8, Notch4, Ltb, Xtrp3, Lin7c, Ptpra, Slc22a7, Mep1a, Gpr1, Csf2rb1, Opn1sw, Oldlr1, Ntf3, Trh, Nphs1, Kcnc3, Slc29a2, Ngep, Ugt1a1, Abi2, Mpdz, Ptprf, Pdgfra, Ereg, Catna1, Gnrhr, Cd48, Tcirg1, Slc4a1, Spnb2, Insrr, Gabbr1, Pvrl1, Nfasc, Alox12_predicted, Tm4sf5_predicted, Itga3_predicted, Spred2, Sgcz_predicted, Dsc1_predicted, Cd226_predicted, Slc12a7, Trpm4, Trpm6, Clca2_predicted, Ntng2_predicted, Snap23, Epb4.2_predicted, Mpp6_predicted, Plxnd1_predicted, Sync_predicted, Epha8, Plxnc1_predicted, Eea1_predicted, Tmprss6_predicted, Cacna1i, Nfam1_predicted, Itgb7, Kirrel3_predicted, Sorl1, Slc22a14_predicted, Oprl1, Pthr1 | 116658, 171018, 25262, 65195, 29492, 83612, 246234, 79558, 300018, 24778, 25323, 29232, 25743, 25344, 286916, 25054, 25125, 303747, 29709, 24214, 360820, 116470, 58966, 83764, 29495, 29473, 85327, 84016, 25108, 81521, 58963, 81641, 293485, 192107, 406162, 361795, 113918, 60442, 25167, 89776, 25684, 25457, 171081, 81644, 140914, 81737, 25569, 64563, 117101, 65194, 367318, 24861, 286928, 29365, 360406, 25267, 59325, 307505, 81668, 245962, 293650, 24779, 305614, 60663, 81657, 192183, 116690, 287454, 303256, 360606, 305539, 364605, 291759, 307199, 308069, 171143, 293874, 308016, 311836, 64630, 362202, 362359, 312652, 362606, 60589, 362873, 314764, 315388, 56827, 362966, 25713, 315546, 300652, 316061, 29256, 56813 |
| nuclear origin of replication recognition complex | 0.00656515 | 2  | 0.14  | Orc2l, Mcm2_predicted                                                                                                                                                                                                                                                                                                                                                                                                                                                                                                                                                                                                                                                                                                                                                                                                                                                                                                   | 301430, 312538                                                                                                                                                                                                                                                                                                                                                                                                                                                                                                                                                                                                                                                                                                                                 |

**Sequence Extraction**

**GeneID Extraction**

**Excel Extraction**

**Extraction Options**

Selected elements with start/end ± bp  
 Complete sequence reverse complement  
 in FASTA format GenBank format

---

**Compare results**

**Enter GeneIDs**

(separated by spaces, returns, or commas)

---

**Further Evaluation of Matches**

**Search PubMed for**

**("gene name") AND**

(where "gene name" is automatically extracted from the description lines)

**Note:** This works only for annotated genomic DNA sequences from eukaryotes!

---

For [comments](#), questions, or bug reports, please contact [support@genomatix.de](mailto:support@genomatix.de).
